# Supplementary material for: Concise synthesis of chiral γ-butenolides via an allylation/lactonization cascade reaction
Source: Royal Society of Chemistry journal article supplement (doi:10.1039/d4cc02781g), 2024-01-01
Supplement: d4cc02781g1.pdf [file d4cc02781g1.pdf]

# Supporting Information

## **Concise synthesis of chiral $\gamma$ -butenolides via an allylation/lactonization cascade**

Zheng Tan, Aying Yihuo, Zhao Wu, Fei Wang, Shunxi Dong,\* and Xiaoming Feng\*

E-mail: dongs@scu.edu.cn; xmfeng@scu.edu.cn

## Table of Content

|                                                                      |     |
|----------------------------------------------------------------------|-----|
| (A) General information .....                                        | 3   |
| (B) Characterization of the substrates .....                         | 3   |
| (C) General procedures for the preparation of racemic products ..... | 7   |
| (D) General procedures for the preparation of chiral products.....   | 7   |
| (E) Optimization of reaction conditions.....                         | 8   |
| (F) Gram-scale synthesis of compound <b>C1</b> .....                 | 11  |
| (G) Transformation of compound <b>C1</b> .....                       | 12  |
| (H). Biological activity study .....                                 | 13  |
| (I). X-ray crystallography data .....                                | 15  |
| (J) Characterization of the products.....                            | 17  |
| (K) Copies of NMR spectra .....                                      | 52  |
| (L) References .....                                                 | 112 |

## (A) General information

$^1\text{H}$  NMR spectra were recorded on Bruker ASCEND<sup>TM</sup> operating at 400 MHz. Chemical shifts were recorded in ppm from tetramethylsilane with the solvent resonance as the internal standard ( $\text{CDCl}_3$ ,  $\delta = 7.26$ ). Data were reported as follows: chemical shift (ppm), multiplicity (s = singlet, d = doublet, t = triplet, q = quartet, m = multiplet, dd = doublet of doublets, dt = doublet of triplets), coupling constants (Hz), integration.  $^{13}\text{C}\{^1\text{H}\}$  NMR data were collected on commercial instruments (101 MHz) with complete proton decoupling. Chemical shifts were reported in ppm from tetramethylsilane with the solvent resonance as internal standard ( $\text{CDCl}_3$ ,  $\delta = 77.0$ ).  $^{19}\text{F}\{^1\text{H}\}$  NMR spectra were collected on a Bruker ASCEND<sup>TM</sup> 400M (376 MHz) in  $\text{CDCl}_3$  with complete proton decoupling. Enantiomeric excesses (ee) were determined by HPLC analysis by using the corresponding commercial chiralpak column as stated in the experimental procedures at 25 °C. Optical rotations were reported as follows:  $[\alpha]_{\lambda}^T$  ( $c = \text{g}/100 \text{ mL}$ , in  $\text{CH}_2\text{Cl}_2$ , unless otherwise noted,  $\lambda = 589 \text{ nm}$ ). IR was detected by Bruker Tensor II spectrometer with Plantium ATR accessory. HRMS was recorded on a Q Exactive hybrid quadrupole-Orbitrap mass spectrometer (ESI). All reactions were carried out in flame-dried reaction flasks, and all reactions involving air-sensitive reagents were performed under nitrogen atmosphere. Solvents were dried and distilled prior to use according to the standard methods. Metal salts obtained from commercial sources were used without further purification. The chiral *N,N'*-dioxide ligands<sup>1</sup>, potassium allyltrifluoroborate<sup>2</sup>, and enone diesters<sup>3</sup> were synthesized by the same procedure in the literature.

## (B) Characterization of the substrates

All the substrates were synthesized according to the methods reported in the literature<sup>2,3</sup>, and the NMR of the known substrates was also consistent with the literature reports, and the NMR characterization of the other new compounds (the blue-marked ones) were as follows:

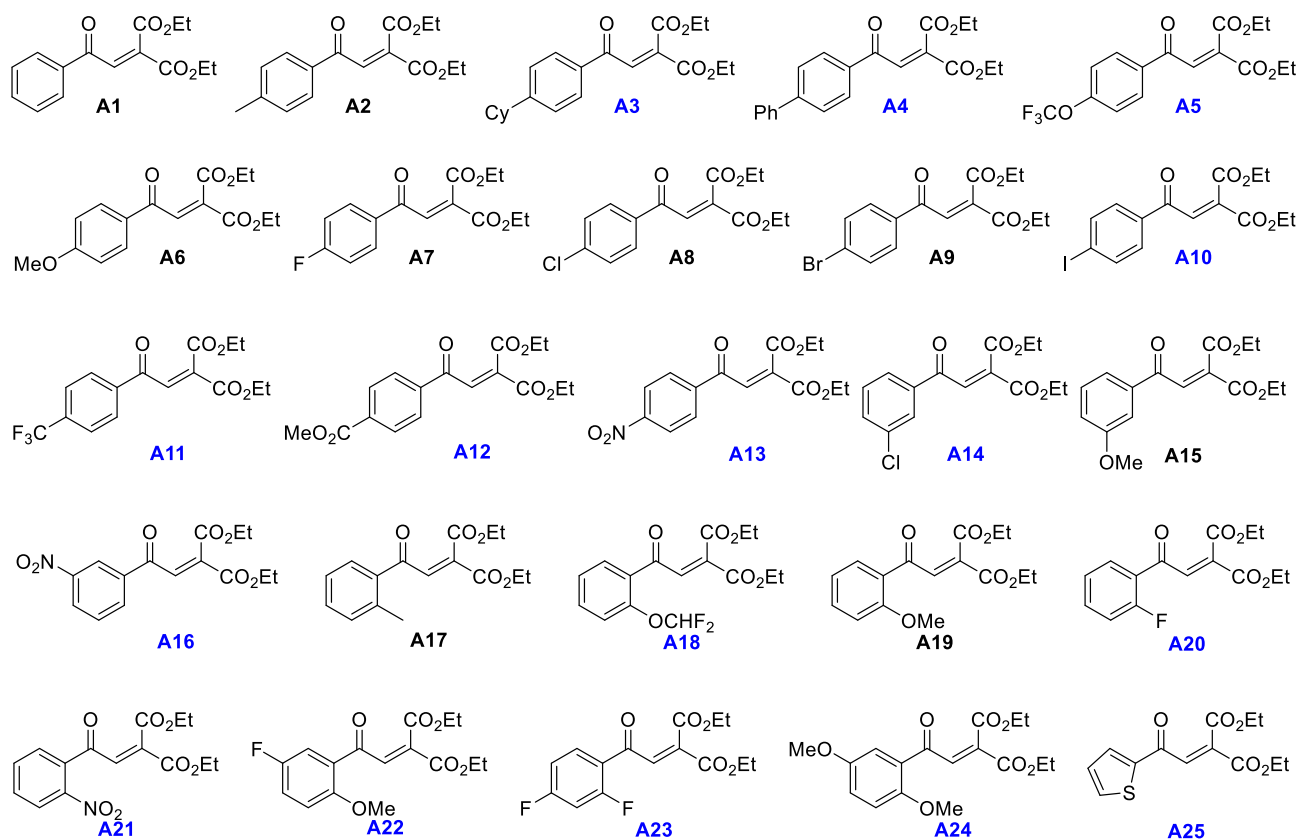

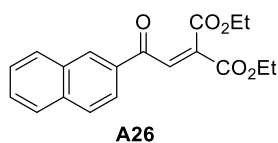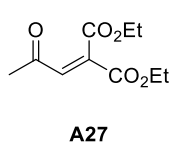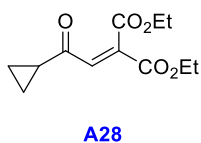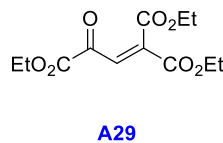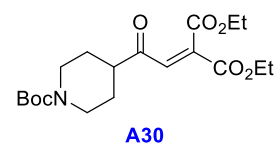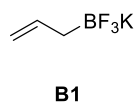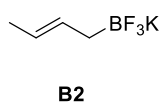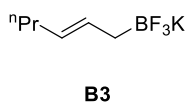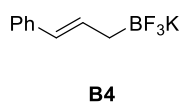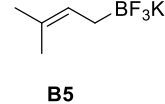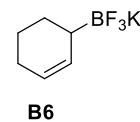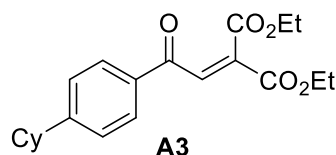

**<sup>1</sup>H NMR** (400 MHz, Chloroform-*d*):  $\delta$  7.93 – 7.88 (m, 2H), 7.85 (s, 1H), 7.37 – 7.30 (m, 2H), 4.34 (q,  $J = 7.2$  Hz, 2H), 4.30 (q,  $J = 7.2$  Hz, 2H), 2.65 – 2.53 (m, 1H), 1.94 – 1.80 (m, 4H), 1.80 – 1.72 (m, 1H), 1.50 – 1.38 (m, 4H), 1.35 (t,  $J = 7.2$  Hz, 3H), 1.29–1.26 (m, 1H), 1.25 (t,  $J = 7.2$  Hz, 4H); **<sup>13</sup>C{<sup>1</sup>H} NMR** (101 MHz, Chloroform-*d*):  $\delta$  188.57, 164.66, 162.96, 155.16, 136.26, 135.43, 133.99, 129.09, 127.45, 62.39, 61.91, 44.80, 34.00, 26.65, 25.97, 14.03, 13.75; **ESI-HRMS** calcd for [C<sub>21</sub>H<sub>26</sub>NO<sub>5</sub>+Na<sup>+</sup>]: 381.1673, found 381.1667;

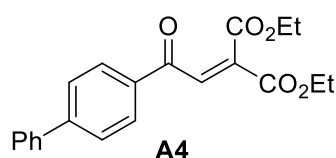

**<sup>1</sup>H NMR** (400 MHz, Chloroform-*d*):  $\delta$  8.33 – 7.17 (m, 10H), 4.61 – 4.02 (m, 4H), 1.55 – 1.00 (m, 6H); **<sup>13</sup>C{<sup>1</sup>H} NMR** (101 MHz, Chloroform-*d*):  $\delta$  188.57, 164.64, 162.94, 146.91, 139.52, 136.55, 135.23, 134.81, 129.48, 129.06, 128.59, 127.56, 127.34, 62.50, 62.03, 14.07, 13.81; **ESI-HRMS** calcd for [C<sub>21</sub>H<sub>20</sub>NO<sub>5</sub>+Na<sup>+</sup>]: 375.1203, found 375.1195;

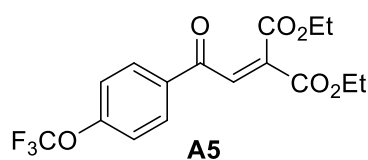

**<sup>1</sup>H NMR** (400 MHz, Chloroform-*d*):  $\delta$  8.08 – 8.00 (m, 2H), 7.81 (s, 1H), 7.38 – 7.30 (m, 2H), 4.33 (dq,  $J = 19.1, 7.1$  Hz, 4H), 1.36 (t,  $J = 7.2$  Hz, 3H), 1.27 (t,  $J = 7.2$  Hz, 3H); **<sup>13</sup>C{<sup>1</sup>H} NMR** (101 MHz, Chloroform-*d*):  $\delta$  187.68, 164.31, 162.69, 153.34 (q,  $J_{F-C} = 1.8$  Hz), 136.99, 134.66, 134.20, 130.91, 120.22 (q,  $J_{F-C} = 259.3$  Hz), 116.36, 62.55, 62.06, 13.97, 13.70; **<sup>19</sup>F{<sup>1</sup>H} NMR** (377 MHz, Chloroform-*d*)  $\delta$  -57.65; **ESI-HRMS** calcd for [C<sub>16</sub>H<sub>15</sub>F<sub>3</sub>O<sub>6</sub>+Na<sup>+</sup>]: 383.0713, found 383.0708;

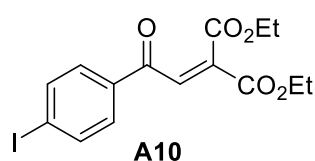

**<sup>1</sup>H NMR** (400 MHz, Chloroform-*d*):  $\delta$  7.92 – 7.82 (m, 2H), 7.78 (s, 1H), 7.72 – 7.64 (m, 2H), 4.33 (dq,  $J = 18.4, 7.1$  Hz, 4H), 1.36 (t,  $J = 7.1$  Hz, 3H), 1.27 (t,  $J = 7.1$  Hz, 3H); **<sup>13</sup>C{<sup>1</sup>H} NMR** (101 MHz, Chloroform-*d*):  $\delta$  188.48, 164.38, 162.75, 138.32, 136.93, 135.31, 134.60, 130.03, 102.71, 62.58, 62.09, 14.04, 13.79; **ESI-HRMS** calcd for [C<sub>15</sub>H<sub>15</sub>IO<sub>5</sub>+Na<sup>+</sup>]: 424.9857, found 424.9849;

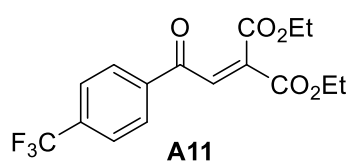

**<sup>1</sup>H NMR** (400 MHz, Chloroform-*d*):  $\delta$  8.12 – 8.06 (m, 2H), 7.82 (s, 1H), 7.79 (d,  $J = 8.2$  Hz, 2H), 4.34 (dq,  $J = 21.7, 7.1$  Hz, 2H), 1.37 (t,  $J = 7.2$  Hz, 1H), 1.27 (t,  $J = 7.1$  Hz, 1H); **<sup>13</sup>C{<sup>1</sup>H} NMR** (101 MHz, Chloroform-*d*):  $\delta$  188.36, 164.20, 162.62, 138.64, 137.36, 135.27 (q,  $J_{F-C} = 32.9$  Hz), 134.45, 129.12, 126.00 (q,  $J = 3.8$  Hz), 123.40 (q,  $J = 272.8$  Hz), 62.65, 62.15, 13.98, 13.72; **ESI-HRMS** calcd for [C<sub>16</sub>H<sub>15</sub>F<sub>3</sub>O<sub>5</sub>+Na<sup>+</sup>]: 367.0764, found 367.0757;

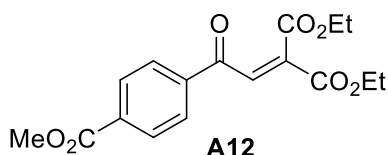

**<sup>1</sup>H NMR** (400 MHz, Chloroform-*d*): δ 8.20 – 8.13 (m, 2H), 8.06 – 7.99 (m, 2H), 7.83 (s, 1H), 4.33 (dq, *J* = 25.4, 7.1 Hz, 4H), 3.97 (s, 3H), 1.37 (t, *J* = 7.1 Hz, 3H), 1.27 (t, *J* = 7.1 Hz, 3H); **<sup>13</sup>C{<sup>1</sup>H} NMR** (101 MHz, Chloroform-*d*): δ 188.75, 165.97, 164.29, 162.71, 139.14, 137.11, 134.78, 134.72, 130.10, 128.71, 62.62, 62.13, 52.62, 14.04, 13.77; **ESI-**

**HRMS** calcd for [C<sub>18</sub>H<sub>18</sub>O<sub>7</sub>+Na<sup>+</sup>]: 357.0945, found 357.0939;

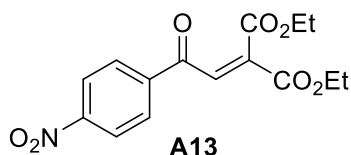

**<sup>1</sup>H NMR** (400 MHz, Chloroform-*d*): δ 8.40 – 8.33 (m, 2H), 8.20 – 8.08 (m, 2H), 7.81 (s, 1H), 4.35 (dq, *J* = 21.6, 7.1 Hz, 4H), 1.37 (t, *J* = 7.1 Hz, 3H), 1.29 (t, *J* = 7.1 Hz, 3H); **<sup>13</sup>C{<sup>1</sup>H} NMR** (101 MHz, Chloroform-*d*): δ 187.88, 164.04, 162.49, 150.82, 140.34, 137.80, 134.07, 129.81, 124.16, 62.78, 62.28, 14.02, 13.79; **ESI-HRMS** calcd for [C<sub>15</sub>H<sub>15</sub>NO<sub>7</sub>+Na<sup>+</sup>]: 344.0741,

found 344.0735; **ESI-HRMS** calcd for [C<sub>15</sub>H<sub>15</sub>NO<sub>7</sub>+Na<sup>+</sup>]: 344.0741, found 344.0735;

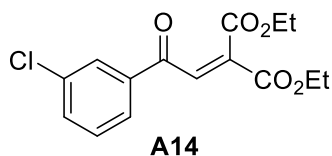

**<sup>1</sup>H NMR** (400 MHz, Chloroform-*d*): δ 7.94 (t, *J* = 1.9 Hz, 1H), 7.88 – 7.81 (m, 1H), 7.78 (s, 1H), 7.60 (ddd, *J* = 8.0, 2.1, 1.0 Hz, 1H), 7.46 (t, *J* = 7.9 Hz, 1H), 4.33 (dq, *J* = 20.1, 7.2 Hz, 4H), 1.36 (t, *J* = 7.1 Hz, 3H), 1.28 (t, *J* = 7.2 Hz, 3H); **<sup>13</sup>C{<sup>1</sup>H} NMR** (101 MHz, Chloroform-*d*): δ 187.98, 164.29, 162.69, 137.52, 137.14, 135.36, 134.56, 134.13, 130.31, 128.73, 126.92, 62.61,

62.12, 14.03, 13.76; **ESI-HRMS** calcd for [C<sub>15</sub>H<sub>15</sub>ClO<sub>5</sub>+Na<sup>+</sup>]: 333.0501, 335.0471, found 333.0495, 335.0463;

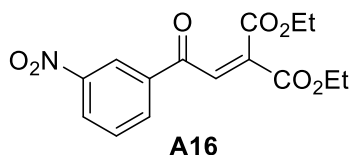

**<sup>1</sup>H NMR** (400 MHz, Chloroform-*d*): δ 8.80 (t, *J* = 2.0 Hz, 1H), 8.50 (ddd, *J* = 8.2, 2.3, 1.1 Hz, 1H), 8.31 (dt, *J* = 7.9, 1.4 Hz, 1H), 7.83 (s, 1H), 7.76 (t, *J* = 8.0 Hz, 1H), 4.36 (dq, *J* = 20.5, 7.2 Hz, 4H), 1.38 (t, *J* = 7.2 Hz, 3H), 1.29 (t, *J* = 7.2 Hz, 3H); **<sup>13</sup>C{<sup>1</sup>H} NMR** (101 MHz, Chloroform-*d*): δ 187.24, 164.11, 162.49, 148.59, 138.03, 137.27, 134.19, 133.73, 130.34, 128.33, 123.57,

62.80, 62.28, 14.03, 13.80; **ESI-HRMS** calcd for [C<sub>15</sub>H<sub>15</sub>NO<sub>7</sub>+Na<sup>+</sup>]: 344.0741, found 344.0736;

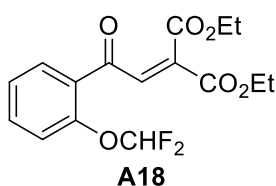

**<sup>1</sup>H NMR** (400 MHz, Chloroform-*d*): δ 7.82 (dd, *J* = 7.8, 1.8 Hz, 1H), 7.71 (s, 1H), 7.60 (ddd, *J* = 8.3, 7.4, 1.8 Hz, 1H), 7.34 (td, *J* = 7.6, 1.1 Hz, 1H), 7.24 (dd, *J* = 8.3, 1.2 Hz, 1H), 6.60 (t, *J*<sub>F-H</sub> = 72.9 Hz, 1H), 4.31 (dq, *J* = 17.1, 7.1 Hz, 4H), 1.34 (t, *J* = 7.1 Hz, 3H), 1.28 (t, *J* = 7.1 Hz, 3H); **<sup>13</sup>C{<sup>1</sup>H} NMR** (101 MHz, Chloroform-*d*): δ 188.99, 164.52, 162.89, 149.97 (t, *J* = 2.8 Hz), 138.07, 134.78, 134.75, 131.14, 129.76, 125.95, 120.04, 115.79 (t, *J* = 262.6 Hz), 62.35, 61.99, 13.97,

13.76; **<sup>19</sup>F{<sup>1</sup>H} NMR** (377 MHz, Chloroform-*d*) δ -81.19; **ESI-HRMS** calcd for [C<sub>16</sub>H<sub>16</sub>F<sub>2</sub>O<sub>6</sub>+Na<sup>+</sup>]: 365.0808, found 365.0802;

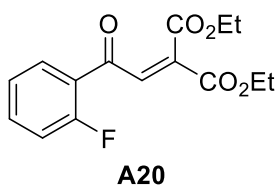

**<sup>1</sup>H NMR** (400 MHz, Chloroform-*d*): δ 7.87 (td, *J* = 7.6, 1.9 Hz, 1H), 7.77 (d, *J* = 3.9 Hz, 1H), 7.65 – 7.55 (m, 1H), 7.32 – 7.24 (m, 1H), 7.22 – 7.14 (m, 1H), 4.34 (qd, *J* = 7.1, 1.8 Hz, 4H), 1.33 (dt, *J* = 15.1, 7.2 Hz, 6H); **<sup>13</sup>C{<sup>1</sup>H} NMR** (101 MHz, Chloroform-*d*): δ 186.86, 186.83, 164.64, 162.87, 162.07 (d, *J*<sub>F-C</sub> = 256.4 Hz), 137.01 (d, *J*<sub>F-C</sub> = 7.1 Hz), 136.09 (d, *J*<sub>F-C</sub> = 1.8 Hz), 135.89 (d, *J*<sub>F-C</sub> = 9.1 Hz), 131.09 (d, *J*<sub>F-C</sub> = 1.8 Hz), 124.95 (d, *J*<sub>F-C</sub> = 11.6 Hz), 124.83 (d, *J*<sub>F-C</sub> = 3.4 Hz),

116.85 (d,  $J_{F-C} = 22.9$  Hz), 62.43, 62.01, 14.01, 13.81;  **$^{19}\text{F}\{^1\text{H}\}$  NMR** (377 MHz, Chloroform-*d*)  $\delta$  -108.90; **ESI-HRMS** calcd for  $[\text{C}_{15}\text{H}_{15}\text{FO}_5+\text{Na}^+]$ : 317.0796, found 317.0792;

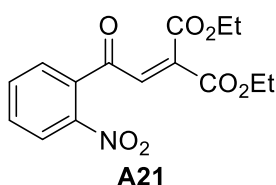

**$^1\text{H}$  NMR** (400 MHz, Chloroform-*d*):  $\delta$  8.18 (dd,  $J = 8.2, 1.2$  Hz, 1H), 7.82 – 7.76 (m, 1H), 7.74 – 7.68 (m, 1H), 7.56 – 7.51 (m, 1H), 4.30 (q,  $J = 7.1$  Hz, 2H), 4.22 (q,  $J = 7.2$  Hz, 2H), 1.31 (td,  $J = 7.2, 1.2$  Hz, 6H);  **$^{13}\text{C}\{^1\text{H}\}$  NMR** (101 MHz, Chloroform-*d*):  $\delta$  189.68, 164.19, 162.45, 146.18, 136.07, 135.31, 134.59, 134.48, 131.85, 129.16, 124.38, 62.67, 62.18, 13.95, 13.78; **ESI-HRMS** calcd for  $[\text{C}_{15}\text{H}_{15}\text{NO}_7+\text{Na}^+]$ : 344.0741, found 344.0735;

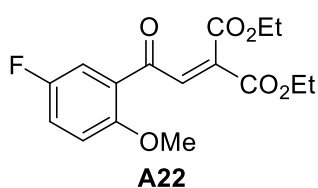

**$^1\text{H}$  NMR** (400 MHz, Chloroform-*d*):  $\delta$  7.82 (s, 1H), 7.51 – 7.42 (m, 1H), 7.30 – 7.20 (m, 1H), 7.01 – 6.91 (m, 1H), 4.33 (q,  $J = 7.1$  Hz, 4H), 3.91 (s, 3H), 1.33 (dt,  $J = 13.9, 7.1$  Hz, 6H);  **$^{13}\text{C}\{^1\text{H}\}$  NMR** (101 MHz, Chloroform-*d*):  $\delta$  188.56 (d,  $J_{F-C} = 1.8$  Hz), 164.92, 163.25, 156.88 (d,  $J_{F-C} = 241.2$  Hz), 155.77 (d,  $J_{F-C} = 2.0$  Hz), 138.66, 133.97, 127.30 (d,  $J_{F-C} = 6.3$  Hz), 121.73 (d,  $J_{F-C} = 23.6$  Hz), 116.97 (d,  $J_{F-C} = 24.3$  Hz), 113.37 (d,  $J_{F-C} = 7.5$  Hz) 62.21, 61.86, 56.44, 14.02, 13.82;  **$^{19}\text{F}$  NMR{ $^1\text{H}$ }** (377 MHz, Chloroform-*d*)  $\delta$  -122.56; **ESI-HRMS** calcd for  $[\text{C}_{16}\text{H}_{17}\text{FO}_6+\text{Na}^+]$ : 347.0902, found 347.0895;

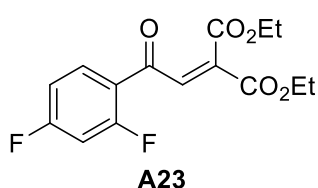

**$^1\text{H}$  NMR** (400 MHz, Chloroform-*d*):  $\delta$  7.94 (td,  $J = 8.6, 6.4$  Hz, 1H), 7.73 (d,  $J = 4.0$  Hz, 1H), 7.07 – 6.97 (m, 1H), 6.93 (ddd,  $J = 11.0, 8.6, 2.4$  Hz, 1H), 4.34 (qd,  $J = 7.2, 3.1$  Hz, 1H), 1.33 (dt,  $J = 14.1, 7.1$  Hz, 1H)  **$^{13}\text{C}\{^1\text{H}\}$  NMR** (101 MHz, Chloroform-*d*):  $\delta$  185.35 (d,  $J_{F-C} = 3.1$  Hz), 167.89 (d,  $J_{F-C} = 12.4$  Hz), 165.31 (d,  $J_{F-C} = 12.3$  Hz), 164.54, 164.21 (d,  $J_{F-C} = 12.7$  Hz), 162.76, 161.64 (d,  $J_{F-C} = 12.8$  Hz), 136.71 (d,  $J_{F-C} = 7.4$  Hz), 136.39 (d,  $J_{F-C} = 1.9$  Hz), 133.17 (dd,  $J_{F-C} = 10.8, 3.4$  Hz), 121.56 (dd,  $J_{F-C} = 11.8, 3.5$  Hz), 112.76 (dd,  $J_{F-C} = 21.7, 3.4$  Hz), 105.05 (dd,  $J_{F-C} = 26.8, 25.5$  Hz), 62.48, 62.03, 13.98, 13.80;  **$^{19}\text{F}$  NMR** (377 MHz, Chloroform-*d*)  $\delta$  -98.99, -99.02, -103.98, -104.01; **ESI-HRMS** calcd for  $[\text{C}_{15}\text{H}_{14}\text{F}_2\text{O}_5+\text{Na}^+]$ : 335.0702, found 335.0895;

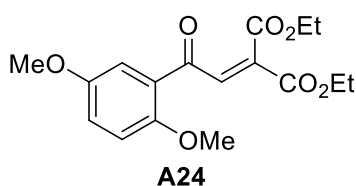

**$^1\text{H}$  NMR** (400 MHz, Chloroform-*d*):  $\delta$  7.87 (s, 1H), 7.30 (d,  $J = 3.2$  Hz, 1H), 7.11 (dd,  $J = 9.1, 3.2$  Hz, 1H), 6.94 (d,  $J = 9.1$  Hz, 1H), 4.33 (qd,  $J = 7.2, 2.8$  Hz, 4H), 3.88 (s, 3H), 3.79 (s, 3H), 1.33 (dt,  $J = 11.9, 7.2$  Hz, 6H);  **$^{13}\text{C}\{^1\text{H}\}$  NMR** (101 MHz, Chloroform-*d*):  $\delta$  189.33, 165.15, 163.41, 154.22, 153.73, 139.34, 133.48, 126.69, 122.53, 113.64, 113.60, 62.11, 61.78, 56.40, 55.83, 14.03, 13.86; **ESI-HRMS** calcd for  $[\text{C}_{17}\text{H}_{20}\text{O}_7+\text{Na}^+]$ : 359.1102, found 359.1094;

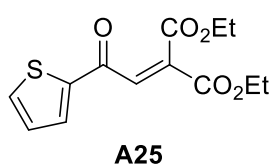

**$^1\text{H}$  NMR** (400 MHz, Chloroform-*d*):  $\delta$  7.85 (dd,  $J = 3.8, 1.2$  Hz, 1H), 7.79 (dd,  $J = 4.9, 1.1$  Hz, 1H), 7.74 (s, 1H), 7.20 (dd,  $J = 4.9, 3.9$  Hz, 1H), 4.36 (dq,  $J = 10.4, 7.1$  Hz, 4H), 1.34 (dt,  $J = 9.5, 7.1$  Hz, 6H);  **$^{13}\text{C}\{^1\text{H}\}$  NMR** (101 MHz, Chloroform-*d*):  $\delta$  180.24, 164.72, 162.75, 143.91, 137.15, 136.34, 133.86, 132.94, 128.72, 62.56, 62.06, 14.00, 13.84; **ESI-HRMS** calcd for  $[\text{C}_{13}\text{H}_{14}\text{O}_5\text{S}+\text{Na}^+]$ : 305.0455, found 305.0450;

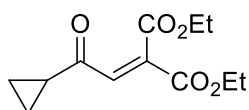

**A28**

**$^1\text{H NMR}$**  (400 MHz, Chloroform-*d*):  $\delta$  7.27 (s, 1H), 4.33 (dq,  $J$  = 15.8, 7.1 Hz, 4H), 2.13 (tt,  $J$  = 7.8, 4.5 Hz, 1H), 1.33 (td,  $J$  = 7.2, 1.6 Hz, 6H), 1.25 – 1.15 (m, 2H), 1.14 – 1.02 (m, 2H);  **$^{13}\text{C}\{^1\text{H}\}$  NMR** (101 MHz, Chloroform-*d*):  $\delta$  198.62, 164.84, 162.86, 135.50, 135.00, 62.41, 61.95, 22.33, 13.97, 13.86, 12.98; **ESI-HRMS** calcd for  $[\text{C}_{12}\text{H}_{16}\text{O}_5+\text{Na}^+]$ : 263.0890, found 263.0886;

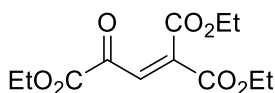

**A29**

**$^1\text{H NMR}$**  (600 MHz, Chloroform-*d*):  $\delta$  7.71 (s, 1H), 4.42 – 4.30 (m, 6H), 1.39 (t,  $J$  = 7.2 Hz, 3H), 1.35 (td,  $J$  = 7.2, 4.0 Hz, 6H);  **$^{13}\text{C}\{^1\text{H}\}$  NMR** (151 MHz, Chloroform-*d*):  $\delta$  181.45, 163.92, 162.12, 159.80, 139.31, 131.14, 63.28, 62.78, 62.45, 13.97, 13.82; **ESI-HRMS** calcd for  $[\text{C}_{12}\text{H}_{16}\text{O}_7+\text{Na}^+]$ : 295.0789, found 295.0783;

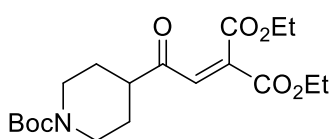

**A30**

**$^1\text{H NMR}$**  (400 MHz, Chloroform-*d*):  $\delta$  7.24 (s, 1H), 4.40 – 4.25 (m, 4H), 4.15 – 4.02 (m, 2H), 2.85 (t,  $J$  = 12.8 Hz, 2H), 2.72 – 2.62 (m, 2H), 1.96 – 1.80 (m, 2H), 1.62 – 1.52 (m, 2H), 1.45 (s, 9H), 1.33 (td,  $J$  = 7.1, 3.0 Hz, 6H);  **$^{13}\text{C}\{^1\text{H}\}$  NMR** (101 MHz, Chloroform-*d*):  $\delta$  199.76, 164.61, 162.56, 154.54, 136.49, 134.49, 79.69, 79.67, 62.47, 61.99, 48.54, 48.52, 28.35, 26.68, 13.93, 13.82;

**ESI-HRMS** calcd for  $[\text{C}_{19}\text{H}_{29}\text{NO}_7+\text{Na}^+]$ : 406.1837, found 406.1830;

## (C) General procedures for the preparation of racemic products

### 1. General procedure for the racemic allylboration/lactonization.

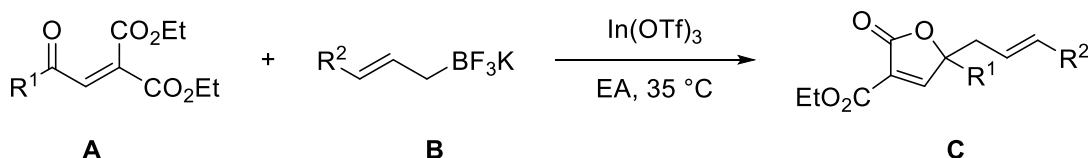

$\text{In}(\text{OTf})_3$  (10 mol%, 5.6 mg), enone diesters **A** (0.10 mmol) and potassium allyltrifluoroborate **B** (0.20 mmol) were stirred in 1.0 mL of ethyl acetate (EA) at 35 °C in water bath till substrate **A** was fully consumed. The reaction mixture was directly subjected to flash column chromatography on silica gel and eluted with petroleum ether/ethyl acetate to afford the racemic product **C**.

## (D) General procedures for the preparation of chiral products

### 1. Representative experimental procedure for the reaction of trifluoroacetophenone **A1** and allyltrifluoroborate **B1**

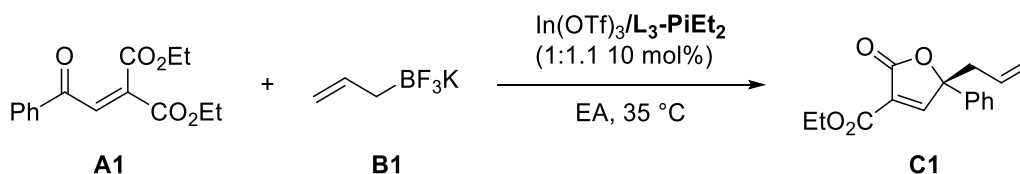

$\text{L}_3\text{-PiEt}_2$  (11 mol%, 6.5 mg),  $\text{In}(\text{OTf})_3$  (10 mol%, 5.6 mg) and enone diesters **A1** (0.10 mmol, 25  $\mu\text{L}$ ) were stirred in 1.0 mL of EA at 35 °C for 30 minutes under  $\text{N}_2$  atmosphere. Then potassium allyltrifluoroborate **B1** (0.20 mmol, 30.0 mg) was added in the glovebox as one portion and the mixture was stirred at 35 °C

for another 10 minutes. The above steps and the reactions must be carried out under N<sub>2</sub> atmosphere. After the reaction was completed, the mixture was directly subjected to flash column chromatography on silica gel and eluted with petroleum ether/ethyl acetate (4/1, v/v) to afford the desired product **C1** as colorless oil.

## (E) Optimization of reaction conditions

### 1. Optimization of the reaction conditions of allylation between enone diesters **A1** and potassium allyltrifluoroborate **B1**

**Table S1.** Screening of the metal salts.

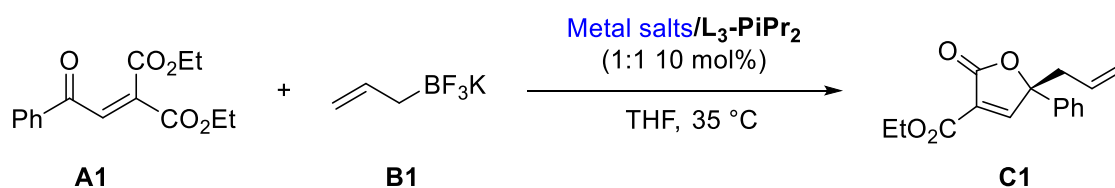

| entry <sup>a</sup> | metal salts          | reaction time | yield (%) <sup>b</sup> | ee (%) <sup>c</sup> |
|--------------------|----------------------|---------------|------------------------|---------------------|
| 1                  | -                    | 48 h          | NR                     | -                   |
| 2                  | Ni(OTf) <sub>2</sub> | 48 h          | NR                     | -                   |
| 3                  | Cu(OTf) <sub>2</sub> | 48 h          | 94                     | 20                  |
| 4                  | Co(OTf) <sub>2</sub> | 48 h          | NR                     | -                   |
| 5                  | Mg(OTf) <sub>2</sub> | 48 h          | NR                     | -                   |
| 6                  | Zn(OTf) <sub>2</sub> | 48 h          | 78                     | 13                  |
| 7                  | Sc(OTf) <sub>3</sub> | 48 h          | NR                     | -                   |
| 8                  | In(OTf) <sub>3</sub> | 2 h           | 99                     | 62                  |
| 9                  | Ga(OTf) <sub>3</sub> | 48 h          | trace                  | -                   |
| 10                 | Al(OTf) <sub>3</sub> | 48 h          | trace                  | -                   |
| 11                 | Yb(OTf) <sub>3</sub> | 48 h          | NR                     | -                   |

<sup>a</sup>All reactions were performed with **A1** (0.10 mmol), **B1** (0.20 mmol), metal salt (10 mol%), L<sub>3</sub>-PiPr<sub>2</sub> (10 mol%) and THF (1.0 mL) at 35 °C for indicated time. <sup>b</sup> Isolated yield. <sup>c</sup> Determined by HPLC analysis on Daicel chiralpak ID.



**Table S2.** Screening of the ligands.

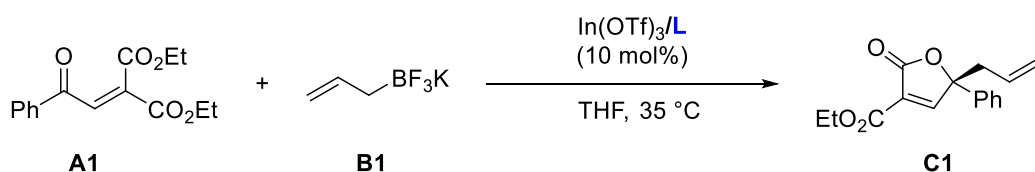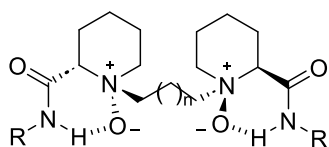

**L<sub>3</sub>-PiPr<sub>2</sub>**: R = 2,6-<sup>i</sup>Pr<sub>2</sub>C<sub>6</sub>H<sub>3</sub> n = 1

**L<sub>3</sub>-PiEt<sub>2</sub>**: R = 2,6-Et<sub>2</sub>C<sub>6</sub>H<sub>3</sub> n = 1

**L<sub>3</sub>-PiMe<sub>2</sub>**: R = 2,6-Me<sub>2</sub>C<sub>6</sub>H<sub>3</sub> n = 1

**L<sub>3</sub>-PiPh**: R = Ph, n = 1

**L<sub>3</sub>-PiMe<sub>3</sub>**: R = 2,4,6-Me<sub>3</sub>C<sub>6</sub>H<sub>2</sub>, n = 1

**L<sub>3</sub>-PiPr<sub>3</sub>**: R = 2,4,6-<sup>i</sup>Pr<sub>3</sub>C<sub>6</sub>H<sub>2</sub>, n = 1

**L<sub>3</sub>-PiEt<sub>2</sub>Me**: R = 2,6-Et<sub>2</sub>-4-MeC<sub>6</sub>H<sub>2</sub>, n = 1

**L<sub>3</sub>-PiF<sub>2</sub>**: R = 2,6-F<sub>2</sub>C<sub>6</sub>H<sub>3</sub>, n = 1

**L<sub>2</sub>-PiMe<sub>2</sub>**: R = 2,6-Me<sub>2</sub>C<sub>6</sub>H<sub>3</sub>, n = 0

**L<sub>2</sub>-PiEt<sub>2</sub>**: R = 2,6-Et<sub>2</sub>C<sub>6</sub>H<sub>3</sub>, n = 0

**L<sub>3</sub>-Pi(OMe)<sub>2</sub>**: R = 2,6-(OMe)<sub>2</sub>C<sub>6</sub>H<sub>3</sub>, n = 1

**L<sub>3</sub>-Pi(OEt)<sub>2</sub>**: R = 2,6-(OEt)<sub>2</sub>C<sub>6</sub>H<sub>3</sub> n = 1

**L<sub>3</sub>-Pi(OiPr)<sub>2</sub>**: R = 2,6-(OiPr)<sub>2</sub>C<sub>6</sub>H<sub>3</sub> n = 1

**L<sub>3</sub>-PiAd**: R = Ad, n = 1

**L<sub>3</sub>-Pi<sup>t</sup>Bu**: R = <sup>t</sup>Bu, n = 1

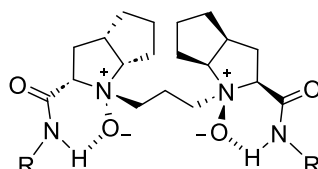

**L<sub>3</sub>-RaPr<sub>2</sub>**: R = 2,6-<sup>i</sup>Pr<sub>2</sub>C<sub>6</sub>H<sub>3</sub>

**L<sub>3</sub>-RaEt<sub>2</sub>**: R = 2,6-Et<sub>2</sub>C<sub>6</sub>H<sub>3</sub>

**L<sub>3</sub>-RaMe<sub>2</sub>**: R = 2,6-Me<sub>2</sub>C<sub>6</sub>H<sub>3</sub>

**L<sub>3</sub>-RaPh**: R = Ph

**L<sub>3</sub>-RaEt<sub>3</sub>**: R = 2,4,6-Et<sub>3</sub>C<sub>6</sub>H<sub>2</sub>

**L<sub>3</sub>-RaEt<sub>2</sub>Me**: R = 2,6-Et<sub>2</sub>-4-MeC<sub>6</sub>H<sub>2</sub>

**L<sub>3</sub>-RaMe<sub>2</sub>Ad**: R = 2,6-Me<sub>2</sub>-4-AdC<sub>6</sub>H<sub>2</sub>

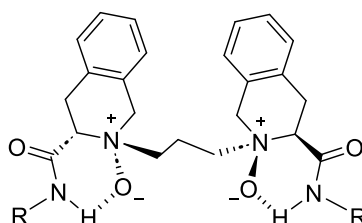

**L<sub>3</sub>-TQPr<sub>2</sub>**: R = 2,6-<sup>i</sup>Pr<sub>2</sub>C<sub>6</sub>H<sub>3</sub>

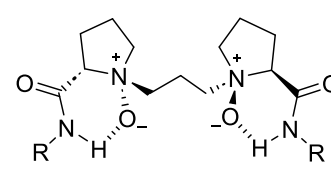

**L<sub>3</sub>-PrPr<sub>2</sub>**: R = 2,6-<sup>i</sup>Pr<sub>2</sub>C<sub>6</sub>H<sub>3</sub>

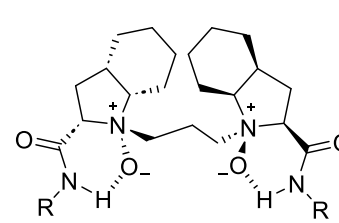

**L<sub>3</sub>-PePr<sub>2</sub>**: R = 2,6-<sup>i</sup>Pr<sub>2</sub>C<sub>6</sub>H<sub>3</sub>

| entry <sup>a</sup> | L                                       | yield (%) <sup>b</sup> | ee (%) <sup>c</sup> |
|--------------------|-----------------------------------------|------------------------|---------------------|
| 1                  | <b>L<sub>3</sub>-PiPr<sub>2</sub></b>   | 99                     | 62                  |
| 2                  | <b>L<sub>3</sub>-RaPr<sub>2</sub></b>   | 78                     | 85                  |
| 3                  | <b>L<sub>3</sub>-PrPr<sub>2</sub></b>   | 76                     | 25                  |
| 4                  | <b>L<sub>3</sub>-PePr<sub>2</sub></b>   | 96                     | 34                  |
| 5                  | <b>L<sub>3</sub>-TQPr<sub>2</sub></b>   | 99                     | 0                   |
| 6                  | <b>L<sub>3</sub>-PiPh</b>               | 99                     | 40                  |
| 7                  | <b>L<sub>3</sub>-PiMe<sub>2</sub></b>   | 99                     | 90                  |
| 8                  | <b>L<sub>3</sub>-PiEt<sub>2</sub></b>   | 99                     | 93                  |
| 9                  | <b>L<sub>3</sub>-PiPr<sub>3</sub></b>   | 99                     | 58                  |
| 10 <sup>d</sup>    | <b>L<sub>3</sub>-PiPh</b>               | 99                     | 56                  |
| 11 <sup>d</sup>    | <b>L<sub>3</sub>-PiMe<sub>2</sub></b>   | 99                     | 90                  |
| 12 <sup>d</sup>    | <b>L<sub>3</sub>-PiEt<sub>2</sub></b>   | 99                     | 93                  |
| 13 <sup>d</sup>    | <b>L<sub>3</sub>-PrEt<sub>2</sub></b>   | 99                     | 14                  |
| 14 <sup>d</sup>    | <b>L<sub>3</sub>-PeEt<sub>2</sub></b>   | 99                     | 9                   |
| 15 <sup>d</sup>    | <b>L<sub>3</sub>-TQEt<sub>2</sub></b>   | 99                     | 48                  |
| 13 <sup>d</sup>    | <b>L<sub>3</sub>-PiMe<sub>3</sub></b>   | 99                     | 76                  |
| 14 <sup>d</sup>    | <b>L<sub>3</sub>-PiEt<sub>2</sub>Me</b> | 99                     | 78                  |

|                 |                                           |    |    |
|-----------------|-------------------------------------------|----|----|
| 15 <sup>d</sup> | <b>L<sub>3</sub>-PiF<sub>2</sub></b>      | 99 | 12 |
| 16 <sup>d</sup> | <b>L<sub>2</sub>-PiMe<sub>2</sub></b>     | 99 | 18 |
| 17 <sup>d</sup> | <b>L<sub>2</sub>-PiEt<sub>2</sub></b>     | 99 | 84 |
| 18 <sup>d</sup> | <b>L<sub>3</sub>-Pi(OMe)<sub>2</sub></b>  | 99 | 19 |
| 19 <sup>d</sup> | <b>L<sub>3</sub>-Pi(OEt)<sub>2</sub></b>  | 99 | 48 |
| 20 <sup>d</sup> | <b>L<sub>3</sub>-Pi(OiPr)<sub>2</sub></b> | 99 | 76 |
| 21 <sup>d</sup> | <b>L<sub>3</sub>-PiAd</b>                 | 99 | 76 |
| 22 <sup>d</sup> | <b>L<sub>3</sub>-Pi<sup>t</sup>Bu</b>     | 99 | 72 |
| 23 <sup>d</sup> | <b>L<sub>3</sub>-RaPh</b>                 | 99 | 30 |
| 24 <sup>d</sup> | <b>L<sub>3</sub>-RaMe<sub>2</sub></b>     | 99 | 69 |
| 25 <sup>d</sup> | <b>L<sub>3</sub>-RaEt<sub>2</sub></b>     | 99 | 58 |
| 26 <sup>d</sup> | <b>L<sub>3</sub>-RaEt<sub>2</sub>Me</b>   | 99 | 70 |
| 27 <sup>d</sup> | <b>L<sub>3</sub>-RaEt<sub>3</sub></b>     | 74 | 45 |
| 28 <sup>d</sup> | <b>L<sub>3</sub>-RaMe<sub>2</sub>Ad</b>   | 88 | 58 |

<sup>a</sup> All reactions were performed with **A1** (0.10 mmol), **B1** (0.20 mmol), metal salt (10 mol%), **L<sub>3</sub>-PiPr<sub>2</sub>** (10 mol%) and THF (1.0 mL) at 35 °C and work up after the **A1** was fully consumed (monitored by TLC). <sup>b</sup> Isolated yield. <sup>c</sup> Determined by HPLC analysis on Daicel chiralpak ID. <sup>d</sup> Metal salt/Ligand = 1: 1.1 (10 mol%).

**Table S3.** Screening of the solvents.

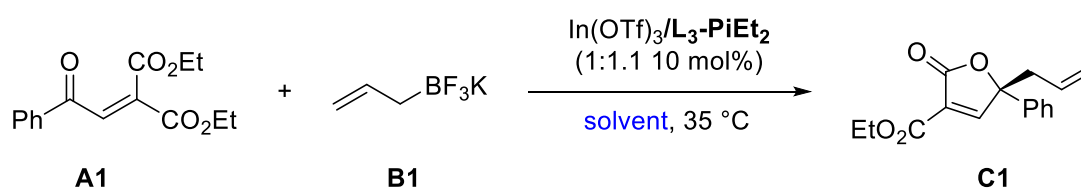

| entry <sup>a</sup> | solvent           | reaction time | yield (%) <sup>b</sup> | ee (%) <sup>c</sup> |
|--------------------|-------------------|---------------|------------------------|---------------------|
| 1                  | DCM               | 4 h           | 99                     | 95                  |
| 2                  | THF               | 2 h           | 99                     | 93                  |
| 3                  | toluene           | 8 h           | 99                     | 95                  |
| 4                  | Et <sub>2</sub> O | 8 h           | 99                     | 95                  |
| 5                  | EA                | 10 min        | 99                     | 95                  |
| 6                  | MeCN              | mess          | -                      | -                   |
| 7                  | 1,4-dioxane       | 10 min        | 99                     | 94                  |
| 8                  | MTBE              | 8 h           | 99                     | 94                  |
| 9                  | 2-Me-THF          | 2 h           | 99                     | 94                  |
| 10                 | DME               | 10 min        | 99                     | 95                  |
| 11                 | DMF               | 24 h          | 99                     | 42                  |

<sup>a</sup>All reactions were performed with **A1** (0.10 mmol), **B1** (0.20 mmol), metal salt (10 mol%), **L<sub>3</sub>-PiEt<sub>2</sub>** (11 mol%) and solvent (1.0 mL) at 35 °C and work up after the **A1** was fully consumed (monitored by TLC). <sup>b</sup> Isolated yield. <sup>c</sup> Determined by HPLC analysis on Daicel chiralpak ID.

**Table S4.** Screening of the reaction temperature.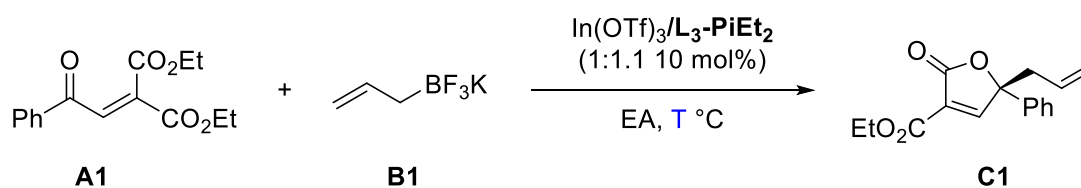

| entry <sup>a</sup> | T (°C) | t      | yield (%) <sup>b</sup> | ee (%) <sup>c</sup> |
|--------------------|--------|--------|------------------------|---------------------|
| 1                  | 35     | 10 min | 99                     | 95                  |
| 2                  | 20     | 2 h    | 99                     | 95                  |
| 3                  | 10     | 2 h    | 99                     | 94                  |
| 4                  | 0      | 3 h    | 99                     | 94                  |
| 5                  | -10    | 5 h    | 99                     | 95                  |

<sup>a</sup> All reactions were performed with **A1** (0.10 mmol), **B1** (0.20 mmol), metal salt (10 mol%), **L<sub>3</sub>-PiEt<sub>2</sub>** (11 mol%) and solvent (1.0 mL) at T °C and work up after the **A1** was fully consumed (monitored by TLC). <sup>b</sup> Isolated yield. <sup>c</sup> Determined by HPLC analysis on Daicel chiralpak ID.

**Table S5.** Screening of the catalyst loading.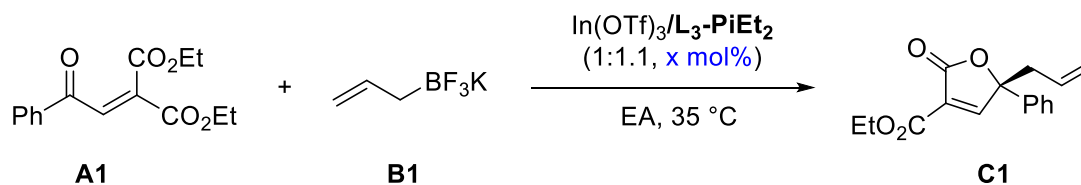

| entry <sup>a</sup> | x  | t      | Yield (%) <sup>b</sup> | ee (%) <sup>c</sup> |
|--------------------|----|--------|------------------------|---------------------|
| 1                  | 10 | 10 min | 99                     | 95                  |
| 2                  | 8  | 2 h    | 99                     | 95                  |
| 3                  | 5  | 12 h   | 72                     | 94                  |
| 4                  | 2  | 12 h   | Trace                  | -                   |
| 5                  | 1  | 12 h   | Trace                  | -                   |

<sup>a</sup> All reactions were performed with **A1** (0.10 mmol), **B1** (0.20 mmol), metal salt (10 mol%), **L<sub>3</sub>-PiEt<sub>2</sub>** (11 mol%) and solvent (1.0 mL) at 35 °C and work up after the **A1** was fully consumed (monitored by TLC). <sup>b</sup> Isolated yield. <sup>c</sup> Determined by HPLC analysis on Daicel chiralpak ID.

**(F) Gram-scale synthesis of compound C1.**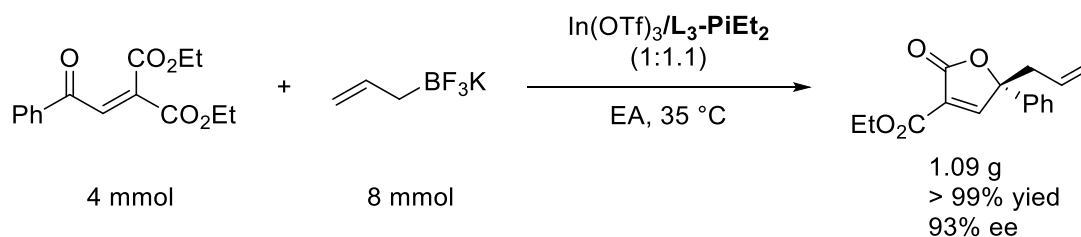

**L<sub>3</sub>-PiEt<sub>2</sub>** (11 mol%, 260 mg), In(OTf)<sub>3</sub> (10 mol%, 224 mg) and enone diesters **A1** (4 mmol, 1.104 g) were stirred in 40 mL of EA at 35 °C in water bath for 30 minutes under N<sub>2</sub> atmosphere. Then potassium

allyltrifluoroborate **B1** (8 mmol, 1.184 g) was added in the glovebox as one portion and the mixture was stirred at 35 °C for another 30 minutes. The above steps and the reactions must be carried out under N<sub>2</sub> atmosphere. After the reaction was completed, the solvent was removed under vacuum and the mixture was purified by flash column chromatography on silica gel and eluted with petroleum ether/ethyl acetate (4/1, v/v) to afford the desired product **C1** as colorless oil.

### (G) Scope Limitation

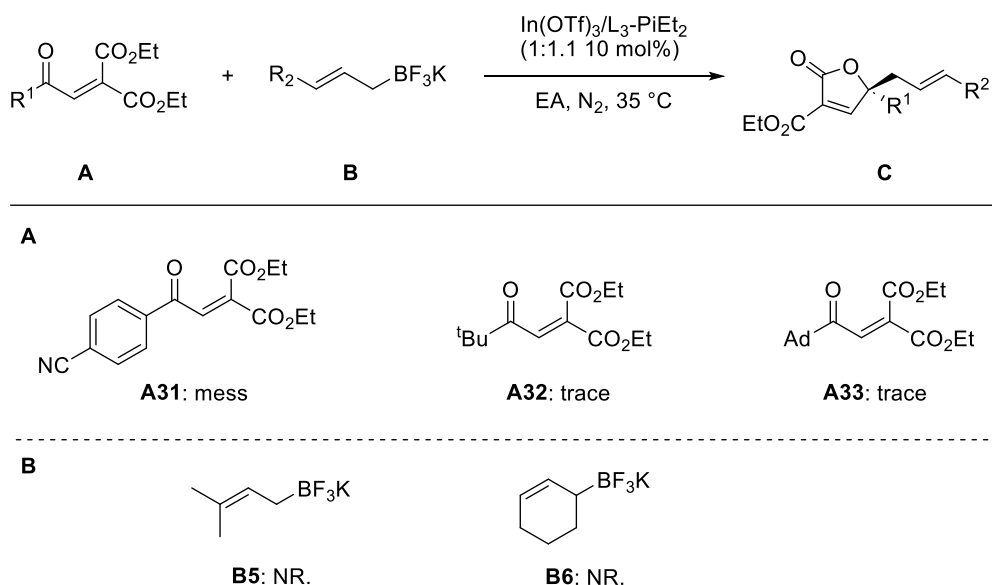

### (H) Transformation of compound C1

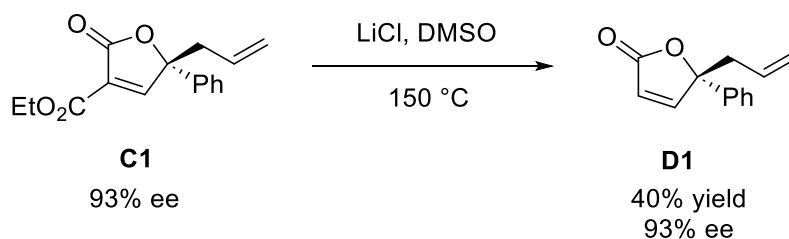

The products **C1** (0.2 mmol) and LiCl (2 mmol, 10 equiv) were added sequentially to the pre-dried reaction tube, then 2.0 mL of dimethyl sulfoxide (DMSO) was added, and the reaction was stirred in at 150 °C in an oil bath for 2 h. When the **C1** is fully consumed, the mixture was cooled to room temperature, and then extracted by ethyl acetate (3\* 3 ML). the organic phase was combined and dried over Na<sub>2</sub>SO<sub>4</sub>, the product **D1** was obtained by column chromatography (petroleum ether/ethyl acetate = 9/1~4/1, v/v).

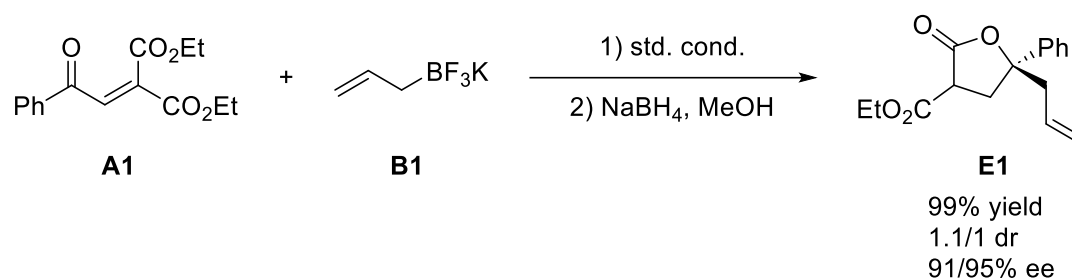

The catalytic reaction (0.1 mmol scale) was carried out under standard reaction conditions, and after the reaction was completed, 0.2 mL of methanol was added to the reaction system, and the reaction was cooled in an ice water bath at 0 °C, and NaBH<sub>4</sub> (1.5 equiv) was added to the reaction system. After the reaction was completed (about 30 minutes), the reduction product **E1** was obtained directly by column chromatography separation (elute: petroleum ether/ethyl acetate = 6/1, v/v).

### (I). Biological activity study

#### Anti-HCCLM3 cell proliferative activity assay

HCCLM3 cells were cultured to higher than 80% fusion rate in 10 mm dishes, trypsin-digested cells were diluted to the appropriate concentration and inoculated in 96-well plates. After 12-16 h of incubation in 37°C, 5% CO<sub>2</sub> incubator, the medium was aspirated, washed twice with phosphate buffered saline (PBS), and new medium was added, followed by the addition of the compound (20 μM) and dimethyl sulfoxide (DMSO) as a control. The medium was aspirated after 24 h, and a blank medium containing 10% (v/v) Cell Counting Kit-8 reagent (Selleck) was added for 1 h of incubation. Absorbance was then measured at 450 nm using a Varioskan Flash Multimode Reader (Thermo Fisher Scientific) and cell viability was calculated by GraphPad Prism 8.0, the data is represented as mean ± standard deviation (SD).

**Table S6. Structures and activities of synthetic compounds**

| compound   | HCCLM3 cell viability (% of control) | compound   | HCCLM3 cell viability (% of control) |
|------------|--------------------------------------|------------|--------------------------------------|
| sorafeinb  | 20.70476                             | <b>C18</b> | 120.5925                             |
| <b>C1</b>  | 140.8507                             | <b>C19</b> | 116.0756                             |
| <b>C2</b>  | 137.5647                             | <b>C20</b> | 104.8728                             |
| <b>C3</b>  | 65.44189                             | <b>C21</b> | 133.3856                             |
| <b>C4</b>  | 63.67407                             | <b>C22</b> | 135.5473                             |
| <b>C5</b>  | 95.99829                             | <b>C23</b> | 140.0133                             |
| <b>C6</b>  | 123.491                              | <b>C24</b> | 122.4767                             |
| <b>C7</b>  | 132.8001                             | <b>C25</b> | 110.2258                             |
| <b>C8</b>  | 132.3812                             | <b>C26</b> | 115.407                              |
| <b>C9</b>  | 123.0938                             | <b>C27</b> | 116.0941                             |
| <b>C10</b> | 107.3269                             | <b>C28</b> | 125.4862                             |
| <b>C11</b> | 116.404                              | <b>C29</b> | 128.5559                             |
| <b>C12</b> | 119.8826                             | <b>C30</b> | 119.5556                             |

|            |          |            |          |
|------------|----------|------------|----------|
| <b>C13</b> | 114.2488 | <b>C31</b> | 124.0899 |
| <b>C14</b> | 140.6541 | <b>C32</b> | 132.3831 |
| <b>C15</b> | 133.9822 | <b>C33</b> | 107.7849 |
| <b>C16</b> | 143.9308 | <b>D1</b>  | 105.4745 |
| <b>C17</b> | 118.8482 | <b>E1</b>  | 117.5245 |

**Table S7 IC<sub>50</sub> of C3 and C4**

| entry     | IC <sub>50</sub> (μM) |         |
|-----------|-----------------------|---------|
|           | HCCLM3                | MHCC97L |
| <b>C3</b> | 9.19                  | 93.51   |
| <b>C4</b> | 14.99                 | 121     |

## (J). X-ray crystallography data

The absolute configuration of product **C26** and the newly generated chiral center was determined to be (S) by X-ray chromatography analysis. Single crystal of **C26** [C<sub>20</sub>H<sub>18</sub>O<sub>4</sub>] was obtained by recrystallization in DCM at room temperature with slow vaporization. CCDC 2331720 (**C26**) contains the supplementary crystallographic data which can be obtained free of charge from The Cambridge Crystallographic Data Center.

For CCDC 2331720 (**C26**), The colourless crystal in rod-shape, with approximate dimensions of 0.228 × 0.441 × 0.530 mm<sup>3</sup>, was selected and mounted for the single-crystal X-ray diffraction. The data set was collected by Bruker D8 Venture Photon II diffractometer at 173(2)K equipped with micro-focus Cu radiation source ( $K\alpha = 1.54178 \text{ \AA}$ ). Applied with face-indexed numerical absorption correction, the structure solution was solved and refinement was processed by SHELXTL (version 6.14) and OLEX 2.3 program package<sup>4a, 4b, 4c, 4d</sup>The structure was analyzed by ADDSYM routine implemented in PLATON suite and no higher symmetry was suggested<sup>4e</sup>.

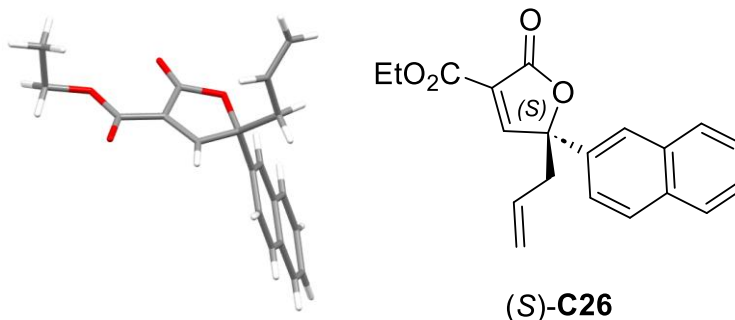

### Crystallographic Data for **C26**.

|                            |                                                |
|----------------------------|------------------------------------------------|
| Formula                    | C <sub>20</sub> H <sub>18</sub> O <sub>4</sub> |
| Formula mass (amu)         | 322.36                                         |
| Space group                | P2 <sub>1</sub> 2 <sub>1</sub> 2 <sub>1</sub>  |
| <i>a</i> (Å)               | 6.3415(1)                                      |
| <i>b</i> (Å)               | 8.4205(2)                                      |
| <i>c</i> (Å)               | 30.8465(7)                                     |
| $\alpha$ (deg)             | 90                                             |
| $\beta$ (deg)              | 90                                             |
| $\gamma$ (deg)             | 90                                             |
| <i>V</i> (Å <sup>3</sup> ) | 1647.16(6)                                     |
| <i>Z</i>                   | 4                                              |
| $\lambda$ (Å)              | 1.54178                                        |
| <i>T</i> (K)               | 173(2)                                         |

|                                                   |             |
|---------------------------------------------------|-------------|
| $\rho_{\text{calcd}}$ (g cm <sup>-3</sup> )       | 1.300       |
| $s\mu$ (mm <sup>-1</sup> )                        | 0.735       |
| Transmission factors                              | 0.730-0.910 |
| $\theta_{\text{max}}$ (deg)                       | 68.267      |
| No. of unique data, including $F_o^2 < 0$         | 3013        |
| No. of unique data, with $F_o^2 > 2\sigma(F_o^2)$ | 2993        |
| No. of variables                                  | 219         |
| $R(F)$ for $F_o^2 > 2\sigma(F_o^2)$ <sup>a</sup>  | 0.0257      |
| $R_w(F_o^2)$ <sup>b</sup>                         | 0.0664      |
| <hr/>                                             |             |
| Goodness of fit                                   | 1.095       |
| <hr/>                                             |             |

<sup>a</sup>  $R(F) = \sum ||F_o| - |F_c|| / \sum |F_o|$ .

<sup>b</sup>  $R_w(F_o^2) = [\sum [w(F_o^2 - F_c^2)^2] / \sum wF_o^4]^{1/2}$ ;  $w^{-1} = [\sigma^2(F_o^2) + (Ap)^2 + Bp]$ , where  $p = [\max(F_o^2, 0) + 2F_c^2] / 3$ .



## (K) Characterization of the products

### Ethyl (S)-5-allyl-2-oxo-5-phenyl-2,5-dihydrofuran-3-carboxylate (C1)

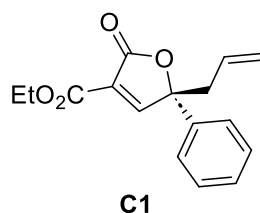

**Results:** colorless oil, 99% yield, 95 % ee;  $[\alpha]_D^{22} = -92.9$  ( $c = 0.95$  g/100 mL,  $\lambda = 589$  nm, in DCM), HPLC (Daicel Chiralpak ID, *n*-hexane/*i*-PrOH 70/30, 1.0 mL/min,  $\lambda = 210$  nm,  $t_{R(\text{minor})} = 8.16$  min,  $t_{R(\text{major})} = 8.93$  min);

**$^1\text{H NMR}$**  (400 MHz, Chloroform-*d*):  $\delta$  8.33 (s, 1H), 7.45 – 7.30 (m, 5H), 5.61 (m, 1H), 5.20 – 5.10 (m, 2H), 4.33 (q,  $J = 7.1$  Hz, 2H), 2.92 (ddt,  $J = 14.4, 7.2, 1.1$  Hz, 1H), 2.84 (ddt,  $J = 14.3, 7.0, 1.1$  Hz, 1H), 1.35 (t,  $J = 7.1$  Hz, 3H);

**$^{13}\text{C}\{^1\text{H}\}$  NMR** (101 MHz, Chloroform-*d*):  $\delta$  166.59, 164.94, 160.06, 137.23, 129.63, 129.06, 128.74, 125.16, 124.68, 121.23, 87.88, 61.85, 43.86, 14.14;

**IR** (film):  $\tilde{\nu}$  ( $\text{cm}^{-1}$ ) 3083, 2983, 2981, 1774, 1721, 1641, 1448, 1370, 1335, 1258, 1066, 1030, 799, 764, 700;

**ESI-HRMS** calcd for  $[\text{C}_{16}\text{H}_{16}\text{O}_4 + \text{Na}^+]$ : 295.0941, found 295.0938;

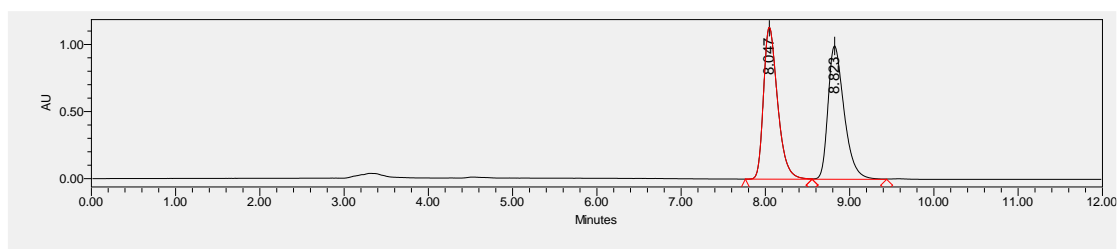

|   | Retention Time | Area     | % Area | Height  |
|---|----------------|----------|--------|---------|
| 1 | 8.047          | 13135899 | 49.94  | 1131785 |
| 2 | 8.823          | 13169363 | 50.06  | 993255  |

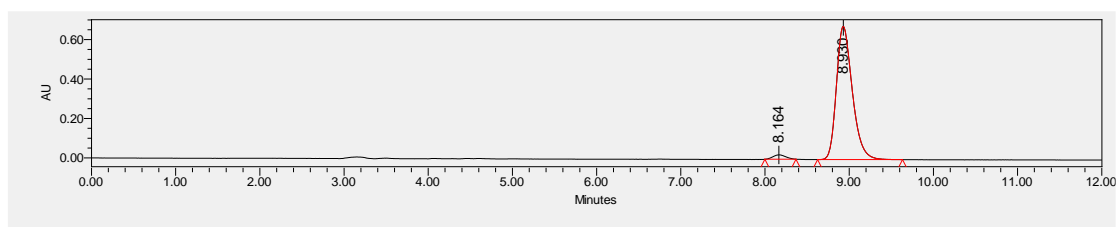

|   | Retention Time | Area    | % Area | Height |
|---|----------------|---------|--------|--------|
| 1 | 8.164          | 228198  | 2.52   | 21984  |
| 2 | 8.930          | 8829116 | 97.48  | 675128 |

## Ethyl (S)-5-allyl-2-oxo-5-(*p*-tolyl)-2,5-dihydrofuran-3-carboxylate (C2)

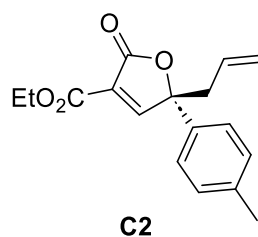

**Results:** colorless oil, 99% yield, 93 % ee;  $[\alpha]_D^{23} = -98.5$  ( $c = 0.62$  g/100 mL,  $\lambda = 589$  nm, in DCM), HPLC (Daicel Chiralpak IG, *n*-hexane/*i*-PrOH 70/30, 1.0 mL/min,  $\lambda = 210$  nm,  $t_{R(\text{minor})} = 10.43$  min,  $t_{R(\text{major})} = 12.67$  min);

**$^1\text{H NMR}$**  (400 MHz, Chloroform-*d*):  $\delta$  8.30 (s, 1H), 7.41 – 7.01 (m, 4H), 5.68 – 5.52 (m, 1H), 5.18 – 5.10 (m, 2H), 4.33 (q,  $J = 7.1$  Hz, 2H), 2.90 (ddt,  $J = 14.4, 7.3, 1.1$  Hz, 1H), 2.82 (ddt,  $J = 14.3, 7.0, 1.1$  Hz, 1H), 2.35 (s, 3H), 1.35 (t,  $J = 7.1$  Hz, 3H);

**$^{13}\text{C}\{^1\text{H}\}$  NMR** (101 MHz, Chloroform-*d*):  $\delta$  166.70, 165.14, 160.12, 138.71, 134.19, 129.77, 129.70, 125.10, 124.50, 121.10, 87.89, 61.81, 43.76, 21.09, 14.14;

**IR** (film):  $\tilde{\nu}$  ( $\text{cm}^{-1}$ ) 2985, 2923, 1780, 1722, 1642, 1264, 1075, 1032, 800, 735, 702;

**ESI-HRMS** calcd for  $[\text{C}_{17}\text{H}_{18}\text{O}_4 + \text{Na}^+]$ : 309.1098, found 295. 309.1093;

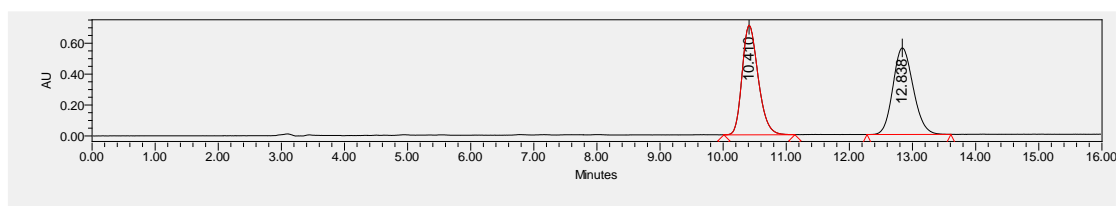

|   | Retention Time | Area     | % Area | Height |
|---|----------------|----------|--------|--------|
| 1 | 13.083         | 22573274 | 50.13  | 935385 |
| 2 | 14.877         | 22454788 | 49.87  | 814348 |

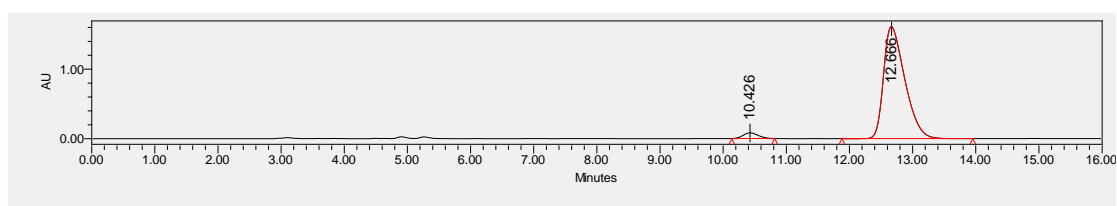

|   | Retention Time | Area     | % Area | Height  |
|---|----------------|----------|--------|---------|
| 1 | 10.426         | 1368298  | 3.52   | 81847   |
| 2 | 12.666         | 37498867 | 96.48  | 1611753 |

## Ethyl (S)-5-allyl-5-(4-cyclohexylphenyl)-2-oxo-2,5-dihydrofuran-3-carboxylate (C3)

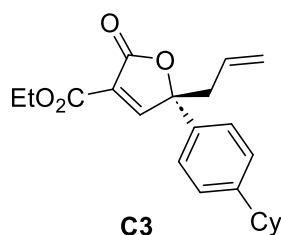

**Results:** colorless oil, 98% yield, 92 % ee;  $[\alpha]_D^{22} = 92.2$  ( $c = 1.10$  g/100 mL,  $\lambda = 589$  nm, in DCM), HPLC (Daicel Chiralpak IG, *n*-hexane/*i*-PrOH 70/30, 1.0 mL/min,  $\lambda = 210$  nm,  $t_{R(\text{minor})} = 8.41$  min,  $t_{R(\text{major})} = 9.53$  min);

**$^1\text{H NMR}$**  (400 MHz, Chloroform-*d*):  $\delta$  8.30 (s, 1H), 7.36 – 7.18 (m, 4H), 5.67 – 5.53 (m, 1H), 5.17 (s, 1H), 5.15 – 5.12 (m, 1H), 4.33 (q,  $J = 7.1$  Hz, 2H), 2.92 (ddt,  $J = 14.3, 7.2, 1.1$  Hz, 1H), 2.83 (ddt,  $J = 14.4, 7.2, 1.1$  Hz, 1H), 2.50 (m, 1H), 1.89 – 1.65 (m, 6H), 1.46 – 1.38 (m, 4H), 1.35 (t,  $J = 7.1$  Hz, 3H);

**$^{13}\text{C}\{^1\text{H}\}$  NMR** (101 MHz, Chloroform-*d*):  $\delta$  166.75, 165.20, 160.13, 148.82, 134.49, 129.78, 127.48, 125.13, 124.49, 121.10, 87.91, 61.80, 44.19, 43.71, 34.32, 34.31, 26.79, 26.06, 14.14;

**IR** (film):  $\tilde{\nu}$  ( $\text{cm}^{-1}$ ) 2924, 2850, 1782, 1723, 1448, 1370, 1314, 1074, 1032, 828, 799;

**ESI-HRMS** calcd for  $[\text{C}_{22}\text{H}_{26}\text{O}_4 + \text{Na}^+]$ : 377.1724, found 377.1717;

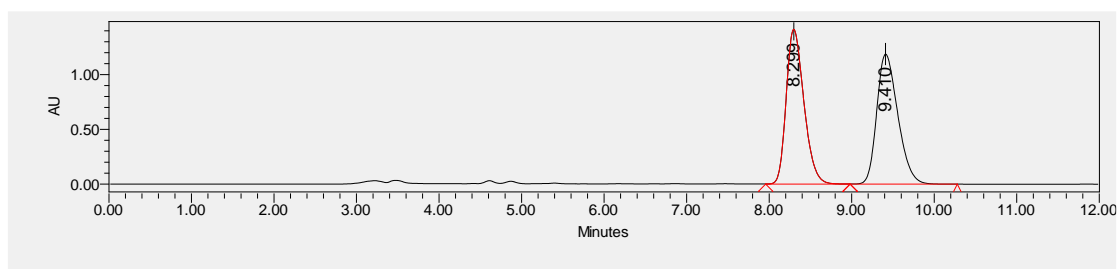

|   | Retention Time | Area     | % Area | Height  |
|---|----------------|----------|--------|---------|
| 1 | 8.299          | 21036944 | 49.98  | 1413372 |
| 2 | 9.410          | 21055800 | 50.02  | 1187552 |

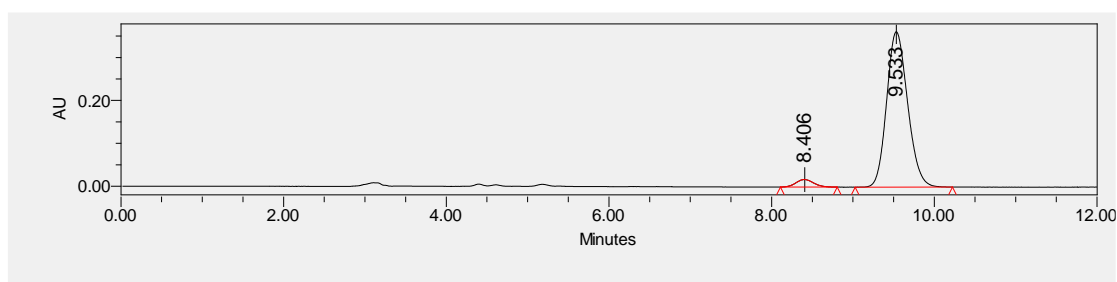

|   | Retention Time | Area    | % Area | Height |
|---|----------------|---------|--------|--------|
| 1 | 8.406          | 264158  | 3.91   | 17588  |
| 2 | 9.533          | 6483818 | 96.09  | 362040 |

## Ethyl (S)-5-([1,1'-biphenyl]-4-yl)-5-allyl-2-oxo-2,5-dihydrofuran-3-carboxylate (C4)

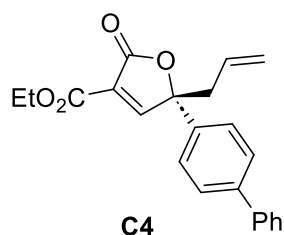

**Results:** white solid, 99% yield, 94 % ee;  $[\alpha]_D^{23} = -129.9$  ( $c = 0.668$  g/100 mL,  $\lambda = 589$  nm, in DCM), HPLC (Daicel Chiralpak IG, *n*-hexane/*i*-PrOH 70/30, 1.0 mL/min,  $\lambda = 210$  nm,  $t_{R(\text{minor})} = 13.82$  min,  $t_{R(\text{major})} = 15.88$  min);

**$^1\text{H NMR}$**  (400 MHz, Chloroform-*d*):  $\delta$  8.35 (s, 1H), 7.67 – 7.52 (m, 4H), 7.52 – 7.41 (m, 4H), 7.38 – 7.33 (m, 1H), 5.71– 5.57 (m, 1H), 5.20 (s, 1H), 5.19 – 5.14 (m, 1H), 4.34 (q,  $J = 7.1$  Hz, 2H), 2.96 (ddt,  $J = 14.3, 7.3, 1.1$  Hz, 1H), 2.87 (ddt,  $J = 14.4, 7.1, 1.1$  Hz, 1H), 1.36 (t,  $J = 7.1$  Hz, 3H);

**$^{13}\text{C}\{^1\text{H}\}$  NMR** (101 MHz, Chloroform-*d*):  $\delta$  166.61, 164.87, 160.07, 141.72, 140.03, 136.09, 129.62, 128.93, 127.80, 127.74, 127.12, 125.66, 124.72, 121.33, 87.81, 61.88, 43.79, 29.72, 14.16;

**IR** (film):  $\tilde{\nu}$  ( $\text{cm}^{-1}$ ) 3081, 2982, 2919, 1776, 1721, 1486, 1374, 1370, 1337, 1255, 1075, 1031, 840, 799, 767, 732, 697;

**ESI-HRMS** calcd for  $[\text{C}_{22}\text{H}_{20}\text{O}_4 + \text{Na}^+]$ : 371.1254, found 371.1248;

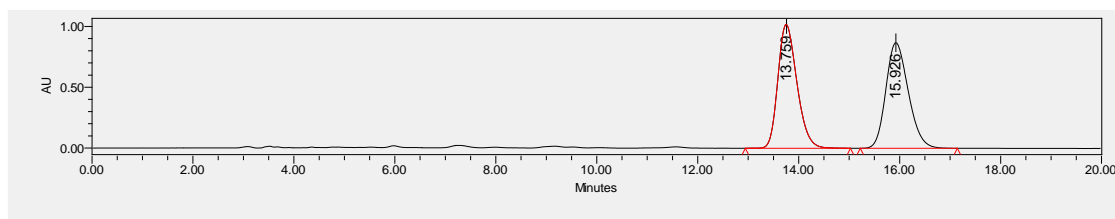

|   | Retention Time | Area     | % Area | Height  |
|---|----------------|----------|--------|---------|
| 1 | 13.759         | 26631164 | 49.87  | 1016790 |
| 2 | 15.926         | 26768694 | 50.13  | 867633  |

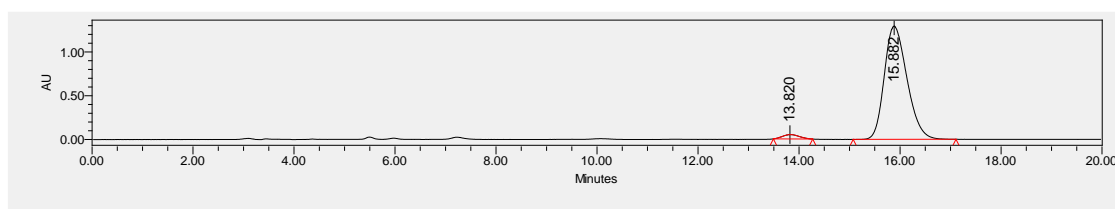

|   | Retention Time | Area     | % Area | Height  |
|---|----------------|----------|--------|---------|
| 1 | 13.820         | 1159021  | 2.79   | 50241   |
| 2 | 15.882         | 40311861 | 97.21  | 1295772 |

**Ethyl (S)-5-allyl-2-oxo-5-(4-(trifluoromethoxy)phenyl)-2,5-dihydrofuran-3-carboxylate (C5)**

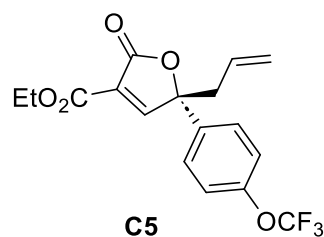

**Results:** colorless oil, 99% yield, 96 % ee;  $[\alpha]_D^{23} = -73.8$  ( $c = 1.31$  g/100 mL,  $\lambda = 589$  nm, in DCM), HPLC (Daicel Chiralpak ODH, *n*-hexane/*i*-PrOH 90/10, 1.0 mL/min,  $\lambda = 210$  nm,  $t_{R(\text{major})} = 7.26$  min,  $t_{R(\text{minor})} = 8.62$  min);

**$^1\text{H NMR}$**  (400 MHz, Chloroform-*d*):  $\delta$  8.31 (s, 1H), 7.50 – 7.40 (m, 2H), 7.30 – 7.22 (m, 2H), 5.67 – 5.53 (m, 1H), 5.24 – 5.11 (m, 2H), 4.34 (q,  $J = 7.1$  Hz, 2H), 2.91 (ddt,  $J = 14.3, 7.3, 1.1$  Hz, 1H), 2.83 (ddt,  $J = 14.3, 7.1, 1.2$  Hz, 1H), 1.36 (t,  $J = 7.1$  Hz, 3H);

**$^{13}\text{C}\{^1\text{H}\}$  NMR** (101 MHz, Chloroform-*d*):  $\delta$  166.22, 164.19, 159.87, 149.29 (d,  $J_{F-C} = 2.0$  Hz), 135.92, 129.21, 126.87, 125.03, 121.64, 121.43, 119.07, 87.28, 61.97, 43.89, 14.10;

**$^{19}\text{F}\{^1\text{H}\}$  NMR** (377 MHz, Chloroform-*d*)  $\delta$  -57.90.

**IR** (film):  $\tilde{\nu}$  ( $\text{cm}^{-1}$ ) 3085, 2985, 2917, 1778, 1723, 1510, 1255, 1212, 1165, 1032, 800, 691;

**ESI-HRMS** calcd for  $[\text{C}_{17}\text{H}_{15}\text{F}_3\text{O}_5 + \text{Na}^+]$ : 379.0764, found 379.0758;

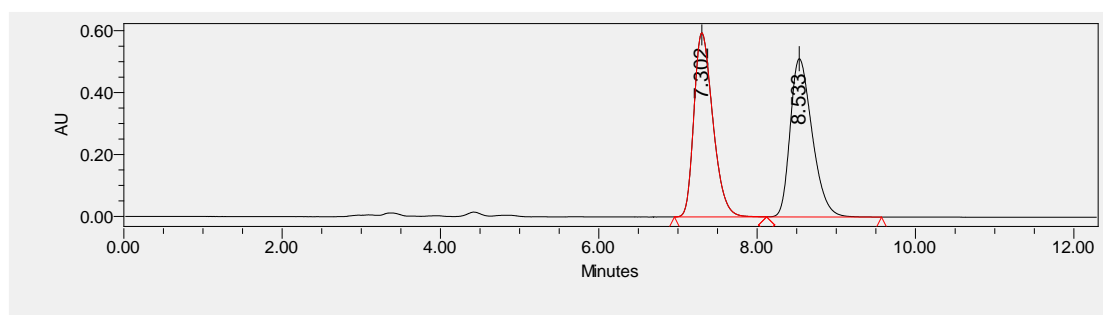

|   | Retention Time | Area    | % Area | Height |
|---|----------------|---------|--------|--------|
| 1 | 7.302          | 9871296 | 50.00  | 594776 |
| 2 | 8.533          | 9870171 | 50.00  | 511540 |

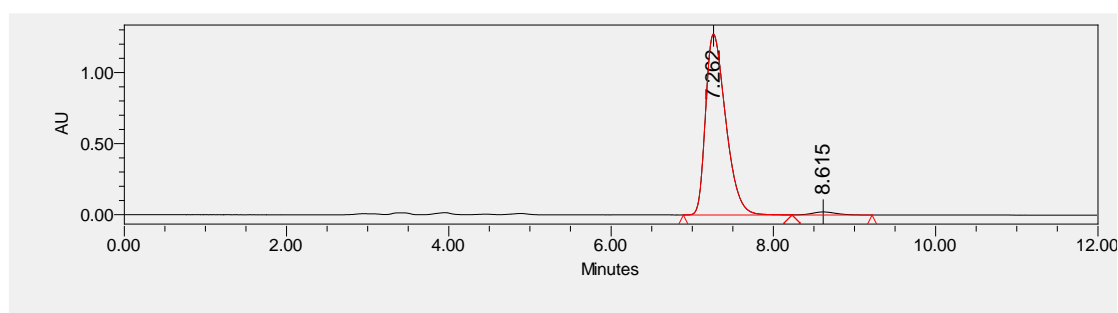

|   | Retention Time | Area     | % Area | Height  |
|---|----------------|----------|--------|---------|
| 1 | 7.262          | 21870145 | 98.05  | 1271550 |
| 2 | 8.615          | 434847   | 1.95   | 21213   |

## Ethyl (S)-5-allyl-5-(4-methoxyphenyl)-2-oxo-2,5-dihydrofuran-3-carboxylate (C6)

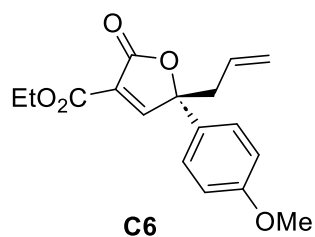

**Results:** colorless oil, 99% yield, 94 % ee;  $[\alpha]_D^{23} = -104.8$  ( $c = 0.546$  g/100 mL,  $\lambda = 589$  nm, in DCM), HPLC (Daicel Chiralpak IG, *n*-hexane/*i*-PrOH 70/30, 1.0 mL/min,  $\lambda = 210$  nm,  $t_{R(\text{minor})} = 12.94$  min,  $t_{R(\text{major})} = 17.00$  min);

**$^1\text{H NMR}$**  (400 MHz, Chloroform-*d*):  $\delta$  8.29 (s, 1H), 7.38 – 7.20 (m, 2H), 6.98 – 6.79 (m, 2H), 5.67 – 5.53 (m, 1H), 5.19 – 5.09 (m, 2H), 4.33 (q,  $J = 7.1$  Hz, 2H), 3.81 (s, 3H), 2.89 (ddt,  $J = 14.3, 7.2, 1.1$  Hz, 1H), 2.82 (ddt,  $J = 14.3, 7.0, 1.2$  Hz, 1H), 1.35 (t,  $J = 7.1$  Hz, 3H);

**$^{13}\text{C}\{^1\text{H}\}$  NMR** (101 MHz, Chloroform-*d*):  $\delta$  166.71, 165.12, 160.14, 159.78, 129.81, 129.03, 126.56, 124.45, 121.08, 114.36, 87.71, 61.81, 55.37, 43.74, 14.14;

**IR** (film):  $\tilde{\nu}$  ( $\text{cm}^{-1}$ ) 3082, 2983, 2935, 1778, 1722, 1514, 1255, 1072, 1032, 800, 750;

**ESI-HRMS** calcd for  $[\text{C}_{17}\text{H}_{18}\text{O}_5 + \text{Na}^+]$ : 325.1047, found 325.1041;

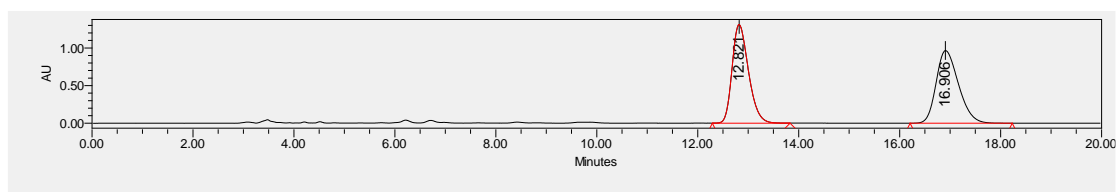

|   | Retention Time | Area     | % Area | Height  |
|---|----------------|----------|--------|---------|
| 1 | 12.821         | 29438208 | 49.86  | 1310921 |
| 2 | 16.906         | 29600763 | 50.14  | 965599  |

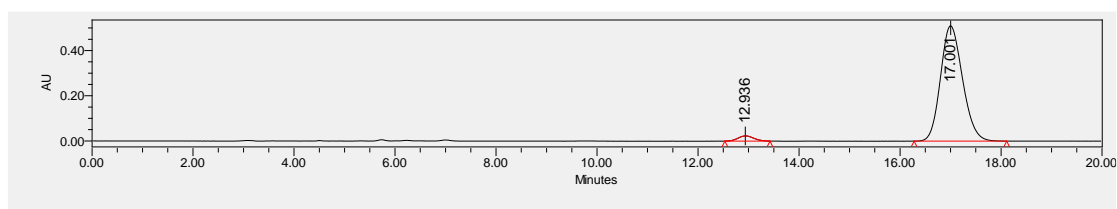

|   | Retention Time | Area     | % Area | Height |
|---|----------------|----------|--------|--------|
| 1 | 12.936         | 496691   | 3.12   | 23024  |
| 2 | 17.001         | 15435871 | 96.88  | 510384 |

## Ethyl (S)-5-allyl-5-(4-fluorophenyl)-2-oxo-2,5-dihydrofuran-3-carboxylate (C7)

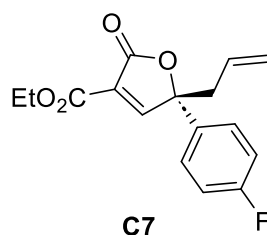

**Results:** colorless oil, 91% yield, 96 % ee;  $[\alpha]_D^{23} = -80.8$  ( $c = 0.500$  g/100 mL,  $\lambda = 589$  nm, in DCM), HPLC (Daicel Chiralpak IG, *n*-hexane/*i*-PrOH 70/30, 1.0 mL/min,  $\lambda = 210$  nm,  $t_{R(\text{minor})} = 7.72$  min,  $t_{R(\text{major})} = 8.57$  min);

**$^1\text{H NMR}$**  (400 MHz, Chloroform-*d*):  $\delta$  8.30 (s, 1H), 7.43 – 7.32 (m, 2H), 7.16 – 7.04 (m, 2H), 5.66 – 5.52 (m, 1H), 5.21 – 5.07 (m, 2H), 4.34 (q,  $J = 7.1$  Hz, 2H), 2.89 (ddt,  $J = 14.3, 7.4, 1.1$  Hz, 1H), 2.81 (ddt,  $J = 14.3, 7.0, 1.1$  Hz, 1H), 1.36 (t,  $J = 7.1$  Hz, 3H);

**$^{13}\text{C}\{^1\text{H}\}$  NMR** (101 MHz, Chloroform-*d*):  $\delta$  166.35, 164.51, 162.67 (d,  $J_{F-C} = 248.7$  Hz) 159.97, 133.07 (d,  $J_{F-C} = 3.3$  Hz), 129.42, 127.14 (d,  $J_{F-C} = 8.3$  Hz), 124.87, 121.45, 116.05 (d,  $J_{F-C} = 21.8$  Hz), 87.41, 61.93, 43.96, 14.12;

**$^{19}\text{F}\{^1\text{H}\}$  NMR** (377 MHz, Chloroform-*d*):  $\delta$  -112.58;

**IR** (film):  $\tilde{\nu}$  ( $\text{cm}^{-1}$ ) 3083, 2985, 2929, 1781, 1723, 1511, 1275, 1260, 1075, 1032, 837, 800, 750;

**ESI-HRMS** calcd for  $[\text{C}_{16}\text{H}_{15}\text{FO}_4 + \text{Na}^+]$ : 313.0847, found 313.0843;

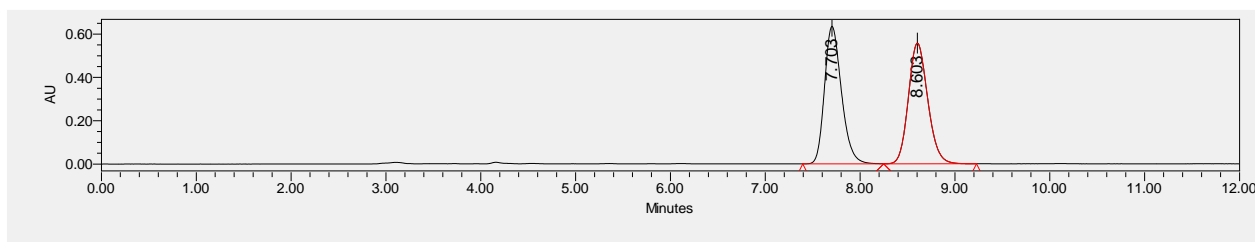

|   | Retention Time | Area    | % Area | Height |
|---|----------------|---------|--------|--------|
| 1 | 7.703          | 7888260 | 50.05  | 635069 |
| 2 | 8.603          | 7871887 | 49.95  | 556858 |

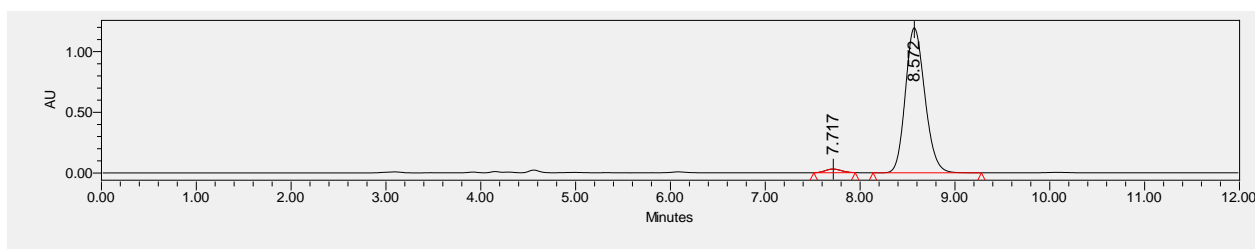

|   | Retention Time | Area     | % Area | Height  |
|---|----------------|----------|--------|---------|
| 1 | 7.717          | 351238   | 2.02   | 30088   |
| 2 | 8.572          | 17013165 | 97.98  | 1195886 |

## Ethyl (S)-5-allyl-5-(4-chlorophenyl)-2-oxo-2,5-dihydrofuran-3-carboxylate (C8)

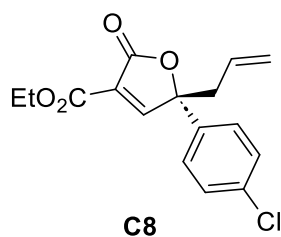

**Results:** colorless oil, 99% yield, 95 % ee;  $[\alpha]_D^{19} = -105.5$  ( $c = 0.584$  g/100 mL,  $\lambda = 589$  nm, in DCM), HPLC (Daicel Chiralpak IG, *n*-hexane/*i*-PrOH 70/30, 1.0 mL/min,  $\lambda = 210$  nm,  $t_{R(\text{minor})} = 8.51$  min,  $t_{R(\text{major})} = 9.61$  min);

**$^1\text{H NMR}$**  (400 MHz, Chloroform-*d*):  $\delta$  8.29 (s, 1H), 7.44 – 7.29 (m, 4H), 5.66 – 5.52 (m, 1H), 5.21 – 5.09 (m, 2H), 4.34 (q,  $J = 7.1$  Hz, 2H), 2.89 (ddt,  $J = 14.3, 7.3, 1.1$  Hz, 1H), 2.80 (ddt,  $J = 14.3, 7.0, 1.1$  Hz, 1H), 1.36 (t,  $J = 7.2$  Hz, 3H);

**$^{13}\text{C}\{^1\text{H}\}$  NMR** (101 MHz, Chloroform-*d*):  $\delta$  166.27, 164.28, 159.91, 135.73, 134.80, 129.29, 129.25, 126.64, 124.93, 121.55, 87.37, 61.95, 43.83, 14.12;

**IR** (film):  $\tilde{\nu}$  ( $\text{cm}^{-1}$ ) 3084, 2983, 2927, 1777, 1722, 1493, 1371, 1314, 1275, 1260, 1093, 1070, 1031, 828, 799, 750;

**ESI-HRMS** calcd for  $[\text{C}_{16}\text{H}_{15}^{35}\text{ClO}_4 + \text{Na}^+]$ : 329.0552, found 329.0547; calcd for  $[\text{C}_{16}\text{H}_{15}^{37}\text{ClO}_4 + \text{Na}^+]$ : 331.0522, found 331.0514;

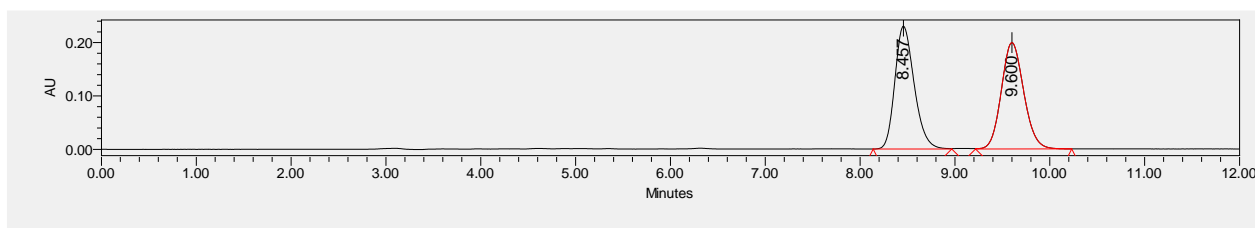

|   | Retention Time | Area    | % Area | Height |
|---|----------------|---------|--------|--------|
| 1 | 8.457          | 3254406 | 49.98  | 229875 |
| 2 | 9.600          | 3257628 | 50.02  | 198968 |

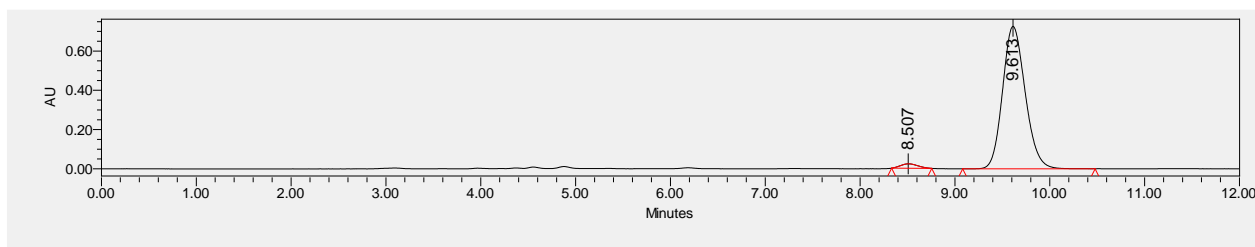

|   | Retention Time | Area     | % Area | Height |
|---|----------------|----------|--------|--------|
| 1 | 8.507          | 285714   | 2.33   | 22688  |
| 2 | 9.613          | 11997296 | 97.67  | 725595 |



## Ethyl (S)-5-allyl-5-(4-bromophenyl)-2-oxo-2,5-dihydrofuran-3-carboxylate (C9)

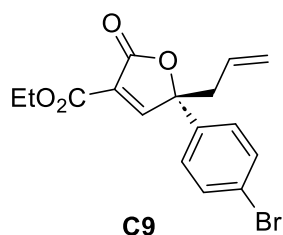

**Results:** colorless oil, 99% yield, 96 % ee;  $[\alpha]_D^{23} = -96.0$  ( $c = 0.650$  g/100 mL,  $\lambda = 589$  nm, in DCM), HPLC (Daicel Chiralpak IG, *n*-hexane/*i*-PrOH 70/30, 1.0 mL/min,  $\lambda = 210$  nm,  $t_{R(\text{minor})} = 9.02$  min,  $t_{R(\text{major})} = 10.25$  min);

**$^1\text{H NMR}$**  (400 MHz, Chloroform-*d*):  $\delta$  8.28 (s, 1H), 7.59 – 7.50 (m, 2H), 7.33 – 7.23 (m, 2H), 5.65 – 5.51 (m, 1H), 5.21 – 5.09 (m, 2H), 4.34 (q,  $J = 7.1$  Hz, 2H), 2.88 (ddt,  $J = 14.3, 7.4, 1.1$  Hz, 1H), 2.80 (ddt,  $J = 14.3, 7.0, 1.1$  Hz, 1H), 1.35 (t,  $J = 7.1$  Hz, 3H);

**$^{13}\text{C}\{^1\text{H}\}$  NMR** (101 MHz, Chloroform-*d*):  $\delta$  166.25, 164.20, 159.89, 136.27, 132.21, 129.26, 126.92, 124.95, 122.94, 121.58, 87.39, 61.96, 43.78, 14.13;

**IR** (film):  $\tilde{\nu}$  ( $\text{cm}^{-1}$ ) 3085, 2983, 2928, 1778, 1722, 1488, 1396, 1370, 1314, 1275, 1259, 1074, 1030, 1010, 824, 799, 749;

**ESI-HRMS** calcd for  $[\text{C}_{16}\text{H}_{15}^{79}\text{BrO}_4 + \text{Na}^+]$ : 373.0046, found 373.0041; calcd for  $[\text{C}_{16}\text{H}_{15}^{37}\text{ClO}_4 + \text{Na}^+]$ : 375.0026, found 375.0020;

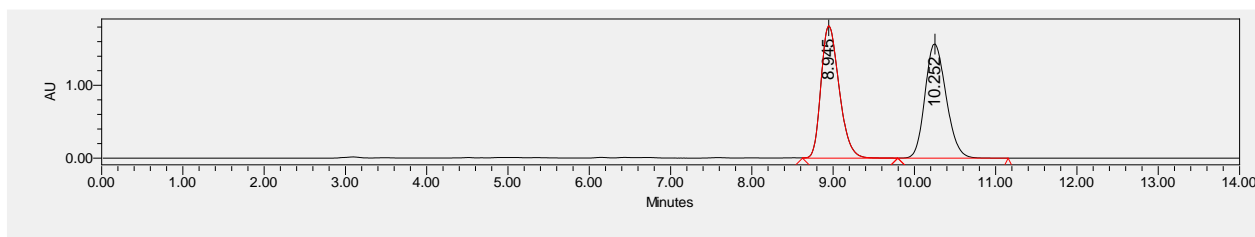

|   | Retention Time | Area     | % Area | Height  |
|---|----------------|----------|--------|---------|
| 1 | 8.945          | 28106627 | 49.85  | 1818342 |
| 2 | 10.252         | 28273166 | 50.15  | 1565329 |

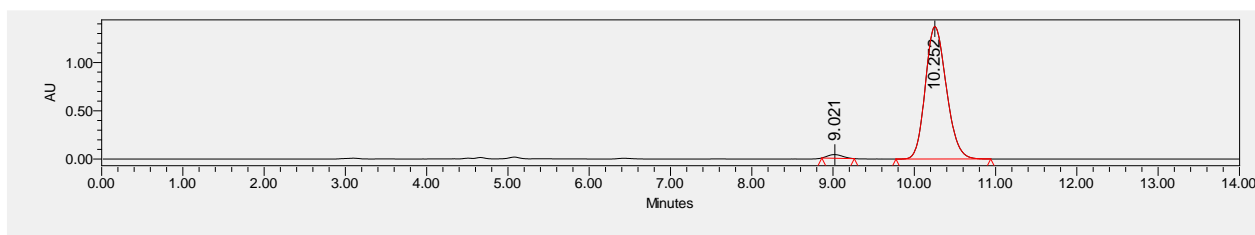

|   | Retention Time | Area     | % Area | Height  |
|---|----------------|----------|--------|---------|
| 1 | 9.021          | 465659   | 1.85   | 37456   |
| 2 | 10.252         | 24642580 | 98.15  | 1371240 |

## Ethyl (S)-5-allyl-5-(4-iodophenyl)-2-oxo-2,5-dihydrofuran-3-carboxylate (C10)

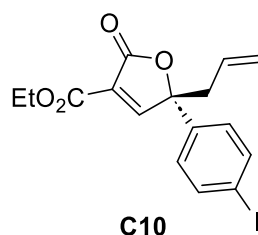

**Results:** colorless oil, 99% yield, 96 % ee;  $[\alpha]_D^{23} = -98.9$  ( $c = 0.750$  g/100 mL,  $\lambda = 589$  nm, in DCM), HPLC (Daicel Chiralpak IG, *n*-hexane/*i*-PrOH 70/30, 1.0 mL/min,  $\lambda = 210$  nm,  $t_{R(\text{minor})} = 9.79$  min,  $t_{R(\text{major})} = 11.14$  min);

**$^1\text{H NMR}$**  (400 MHz, Chloroform-*d*):  $\delta$  8.27 (s, 1H), 7.79 – 7.68 (m, 2H), 7.20 – 7.10 (m, 2H), 5.65 – 5.51 (m, 1H), 5.21 – 5.08 (m, 2H), 4.33 (q,  $J = 7.1$  Hz, 2H), 2.88 (ddt,  $J = 14.3, 7.3, 1.1$  Hz, 1H), 2.79 (ddt,  $J = 14.4, 7.0, 1.1$  Hz, 1H), 1.35 (t,  $J = 7.1$  Hz, 3H);

**$^{13}\text{C}\{^1\text{H}\}$  NMR** (101 MHz, Chloroform-*d*):  $\delta$  166.25, 164.20, 159.88, 138.16, 136.96, 129.26, 127.05, 124.93, 121.58, 94.60, 87.45, 61.95, 43.72, 14.13;

**IR** (film):  $\tilde{\nu}$  ( $\text{cm}^{-1}$ ) 3083, 2982, 2927, 1778, 1722, 1486, 1393, 1370, 1314, 1275, 1259, 1066, 1031, 1005, 821, 799, 750;

**ESI-HRMS** calcd for  $[\text{C}_{16}\text{H}_{15}\text{IO}_4 + \text{Na}^+]$ : 420.9908, found 420.9899;

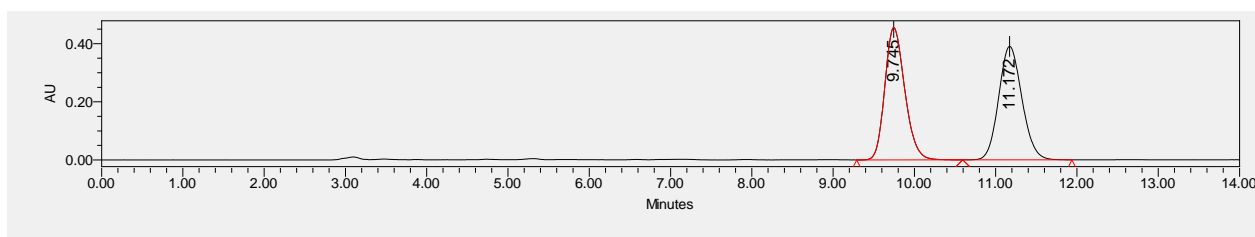

|   | Retention Time | Area    | % Area | Height |
|---|----------------|---------|--------|--------|
| 1 | 9.745          | 7754559 | 50.00  | 455709 |
| 2 | 11.172         | 7755716 | 50.00  | 390068 |

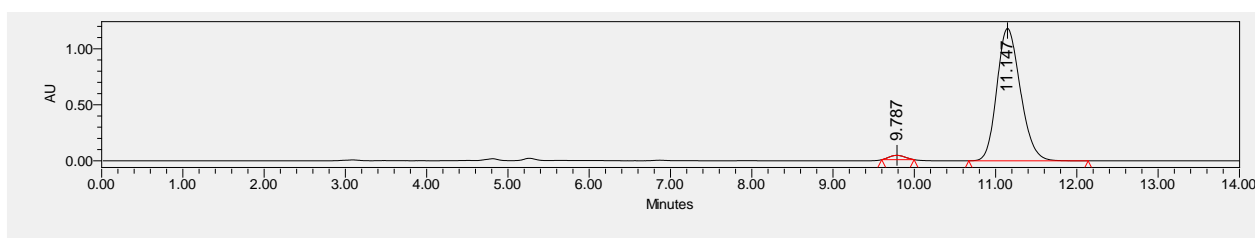

|   | Retention Time | Area     | % Area | Height  |
|---|----------------|----------|--------|---------|
| 1 | 9.787          | 511835   | 2.11   | 38653   |
| 2 | 11.147         | 23721220 | 97.89  | 1182711 |

**Ethyl (S)-5-allyl-2-oxo-5-(4-(trifluoromethyl)phenyl)-2,5-dihydrofuran-3-carboxylate (C11)**

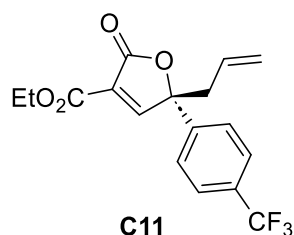

**Results:** colorless oil, 99% yield, 96 % ee;  $[\alpha]_D^{23} = -77.8$  ( $c = 0.636$  g/100 mL,  $\lambda = 589$  nm, in DCM), HPLC (Daicel Chiralpak IG, *n*-hexane/*i*-PrOH 80/20, 1.0 mL/min,  $\lambda = 210$  nm,  $t_{R(\text{minor})} = 7.46$  min,  $t_{R(\text{major})} = 8.13$  min);

**$^1\text{H NMR}$**  (400 MHz, Chloroform-*d*):  $\delta$  8.32 (s, 1H), 7.68 (d,  $J = 8.3$  Hz, 2H), 7.55 (d,  $J = 8.1$  Hz, 2H), 5.67 – 5.53 (m, 1H), 5.23 – 5.11 (m, 2H), 4.34 (q,  $J = 7.1$  Hz, 2H), 2.92 (ddt,  $J = 14.3, 7.3, 1.1$  Hz, 1H), 2.84 (ddt,  $J = 14.3, 7.0, 1.1$  Hz, 1H), 1.36 (t,  $J = 7.2$  Hz, 3H);

**$^{13}\text{C}\{^1\text{H}\}$  NMR** (101 MHz, Chloroform-*d*):  $\delta$  166.07, 163.84, 159.78, 141.20, 131.00 (d,  $J_{F-C} = 32.8$  Hz), 129.02, 126.07 (q,  $J_{F-C} = 3.7$  Hz), 125.69, 125.24, 123.68 (d,  $J_{F-C} = 272.2$  Hz), 121.81, 87.36, 62.02, 43.89, 14.10;

**$^{19}\text{F}\{^1\text{H}\}$  NMR** (377 MHz, Chloroform-*d*):  $\delta$  -62.81;

**IR** (film):  $\tilde{\nu}$  ( $\text{cm}^{-1}$ ) 3085, 2985, 2916, 1778, 1723, 1323, 1276, 1260, 1166, 1123, 1069, 1031, 1017, 842, 800, 750;

**ESI-HRMS** calcd for  $[\text{C}_{17}\text{H}_{15}\text{F}_3\text{O}_4 + \text{Na}^+]$ : 363.0815, found 363.0808;

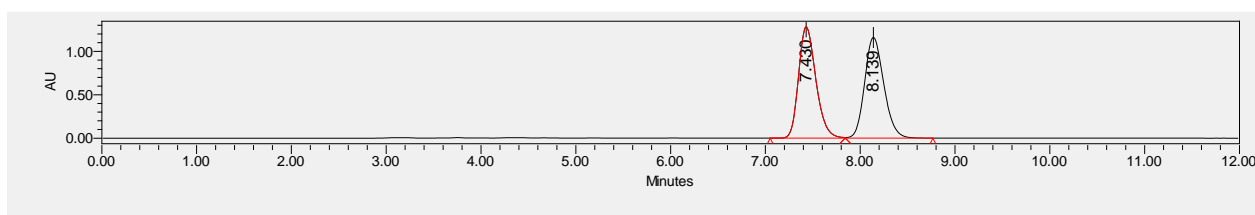

|   | Retention Time | Area     | % Area | Height  |
|---|----------------|----------|--------|---------|
| 1 | 7.430          | 16253391 | 49.94  | 1281793 |
| 2 | 8.139          | 16293344 | 50.06  | 1158629 |

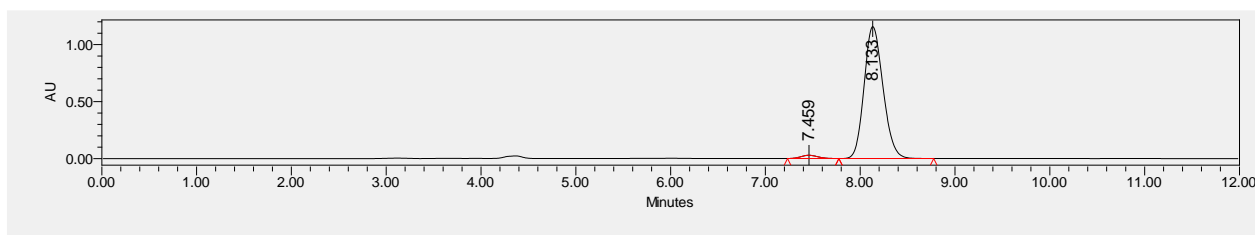

|   | Retention Time | Area     | % Area | Height  |
|---|----------------|----------|--------|---------|
| 1 | 7.459          | 349526   | 2.14   | 28612   |
| 2 | 8.133          | 16009566 | 97.86  | 1157037 |

## Ethyl (S)-5-allyl-5-(4-(methoxycarbonyl)phenyl)-2-oxo-2,5-dihydrofuran-3-carboxylate (C12)

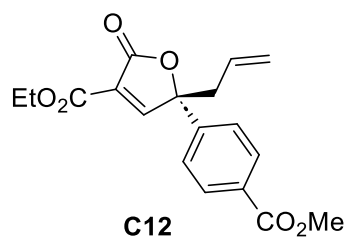

**Results:** colorless oil, 99% yield, 95 % ee;  $[\alpha]_D^{23} = -106.9$  ( $c = 0.598$  g/100 mL,  $\lambda = 589$  nm, in DCM), HPLC (Daicel Chiralpak IG, *n*-hexane/*i*-PrOH 70/30, 1.0 mL/min,  $\lambda = 210$  nm,  $t_{R(\text{minor})} = 16.46$  min,  $t_{R(\text{major})} = 25.43$  min);

**$^1\text{H NMR}$**  (400 MHz, Chloroform-*d*):  $\delta$  8.33 (s, 1H), 8.11 – 8.02 (m, 2H), 7.53 – 7.44 (m, 2H), 5.66 – 5.52 (m, 1H), 5.21 – 5.09 (m, 2H), 4.34 (q,  $J = 7.1$  Hz, 2H), 3.93 (s, 4H), 2.92 (ddt,  $J = 14.3, 7.3, 1.1$  Hz, 1H), 2.83 (ddt,  $J = 14.4, 7.0, 1.1$  Hz, 1H), 1.36 (t,  $J = 7.1$  Hz, 3H);

**$^{13}\text{C}\{^1\text{H}\}$  NMR** (101 MHz, Chloroform-*d*):  $\delta$  166.28, 166.19, 164.04, 159.86, 141.97, 130.52, 130.29, 129.16, 125.27, 125.12, 121.65, 87.62, 61.98, 52.36, 43.89, 14.12;

**IR** (film):  $\tilde{\nu}$  ( $\text{cm}^{-1}$ ) 3083, 2985, 2954, 1782, 1722, 1436, 1279, 1190, 1112, 1070, 1032, 859, 800, 750;

**ESI-HRMS** calcd for  $[\text{C}_{18}\text{H}_{18}\text{O}_6+\text{Na}^+]$ : 353.0996, found 353.0991;

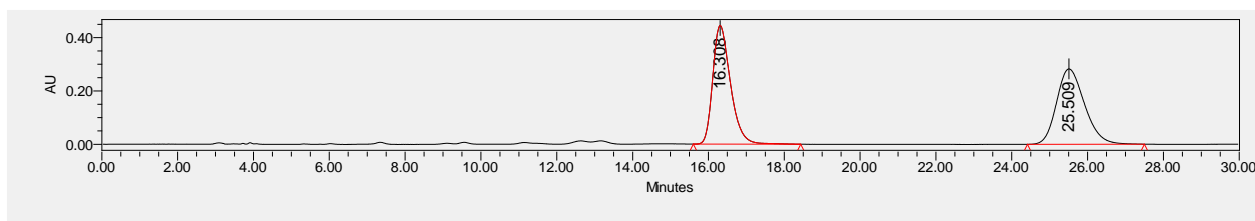

|   | Retention Time | Area     | % Area | Height |
|---|----------------|----------|--------|--------|
| 1 | 16.308         | 14422810 | 49.94  | 444750 |
| 2 | 25.509         | 14454932 | 50.06  | 282688 |

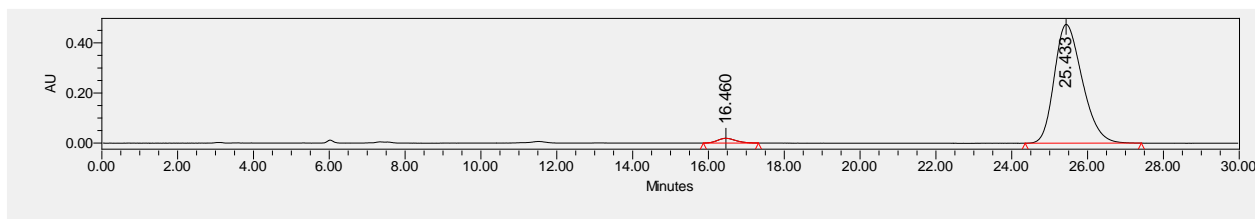

|   | Retention Time | Area     | % Area | Height |
|---|----------------|----------|--------|--------|
| 1 | 16.460         | 628630   | 2.52   | 18843  |
| 2 | 25.433         | 24282732 | 97.48  | 474155 |

## Ethyl (S)-5-allyl-5-(4-nitrophenyl)-2-oxo-2,5-dihydrofuran-3-carboxylate (C13)

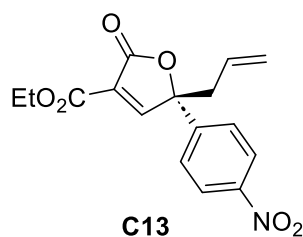

**Results:** colorless oil, 99% yield, 96% ee;  $[\alpha]_D^{22} = -110.5$  ( $c = 0.570$  g/100 mL,  $\lambda = 589$  nm, in DCM), HPLC (Daicel Chiralpak IG, *n*-hexane/*i*-PrOH 70/30, 1.0 mL/min,  $\lambda = 210$  nm,  $t_{R(\text{minor})} = 13.22$  min,  $t_{R(\text{major})} = 14.91$  min);

**$^1\text{H NMR}$**  (400 MHz, Chloroform-*d*):  $\delta$  8.35 (s, 1H), 8.33 – 8.22 (m, 2H), 7.66 – 7.58 (m, 2H), 5.66 – 5.55 (m, 1H), 5.31 – 5.04 (m, 2H), 4.35 (q,  $J = 7.1$  Hz, 2H), 2.94 (dd,  $J = 14.3, 7.5$  Hz, 1H), 2.85 (dd,  $J = 14.3, 7.0$  Hz, 1H), 1.36 (t,  $J = 7.1$  Hz, 3H);

**$^{13}\text{C}\{^1\text{H}\}$  NMR** (101 MHz, Chloroform-*d*):  $\delta$  165.78, 163.20, 159.63, 147.91, 144.15, 128.71, 126.38, 125.54, 124.26, 122.15, 87.21, 62.13, 43.95, 14.10;

**IR** (film):  $\tilde{\nu}$  ( $\text{cm}^{-1}$ ) 3085, 2983, 2928, 1781, 1722, 1521, 1349, 1315, 1067, 1030, 856, 799, 697;

**ESI-HRMS** calcd for  $[\text{C}_{16}\text{H}_{15}\text{NO}_6 + \text{Na}^+]$ : 340.0792, found 340.0787;

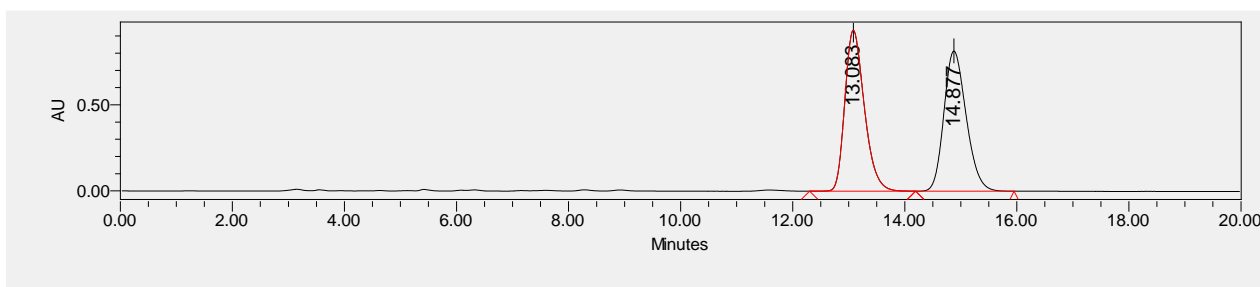

|   | Retention Time | Area     | % Area | Height |
|---|----------------|----------|--------|--------|
| 1 | 13.083         | 22573274 | 50.13  | 935385 |
| 2 | 14.877         | 22454788 | 49.87  | 814348 |

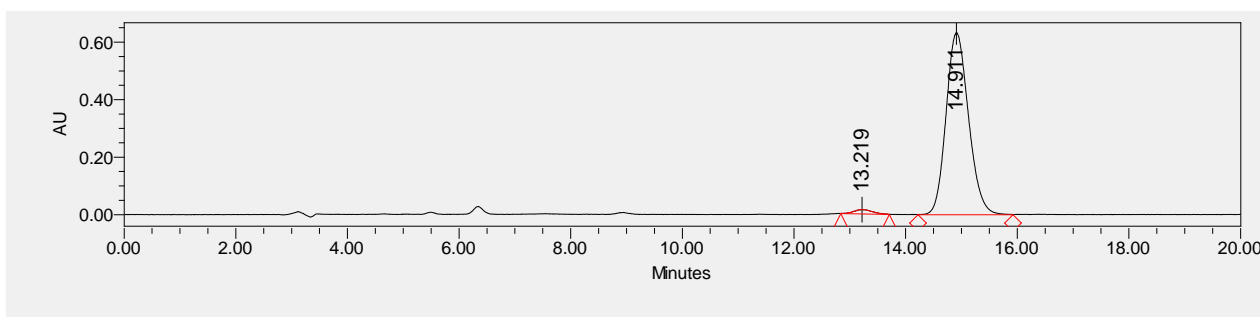

|   | Retention Time | Area     | % Area | Height |
|---|----------------|----------|--------|--------|
| 1 | 13.219         | 343107   | 1.90   | 15113  |
| 2 | 14.911         | 17709344 | 98.10  | 635365 |

## Ethyl (S)-5-allyl-5-(3-chlorophenyl)-2-oxo-2,5-dihydrofuran-3-carboxylate (C14)

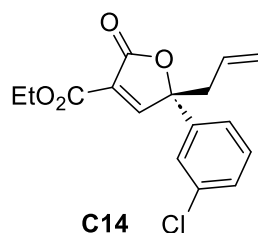

**Results:** colorless oil, 99% yield, 92% ee;  $[\alpha]_D^{23} = -81.6$  ( $c = 0.564$  g/100 mL,  $\lambda = 589$  nm, in DCM), HPLC (Daicel Chiralpak IG, *n*-hexane/*i*-PrOH 70/30, 1.0 mL/min,  $\lambda = 210$  nm,  $t_{R(\text{major})} = 12.80$  min,  $t_{R(\text{minor})} = 13.87$  min);

**$^1\text{H NMR}$**  (400 MHz, Chloroform-*d*):  $\delta$  8.29 (s, 1H), 7.43 – 7.23 (m, 4H), 5.66 – 5.51 (m, 1H), 5.24 – 5.11 (m, 2H), 4.34 (q,  $J = 7.1$  Hz, 2H), 2.90 (ddt,  $J = 14.3, 7.3, 1.1$  Hz, 1H), 2.81 (ddt,  $J = 14.3, 7.0, 1.1$  Hz, 1H), 1.36 (t,  $J = 7.1$  Hz, 3H);

**$^{13}\text{C}\{^1\text{H}\}$  NMR** (101 MHz, Chloroform-*d*):  $\delta$  166.21, 164.10, 159.86, 139.20, 135.09, 130.36, 129.18, 128.95, 125.50, 125.03, 123.37, 121.64, 87.23, 61.97, 43.80, 14.12;

**IR** (film):  $\tilde{\nu}$  ( $\text{cm}^{-1}$ ) 3084, 2983, 2927, 1780, 1723, 1371, 1338, 1315, 1259, 1069, 1137, 1032, 799, 749, 697;

**ESI-HRMS** calcd for  $[\text{C}_{16}\text{H}_{15}^{35}\text{ClO}_4 + \text{Na}^+]$ : 329.0552, found 329.0562; calcd for  $[\text{C}_{16}\text{H}_{15}^{37}\text{ClO}_4 + \text{Na}^+]$ : 331.0522, found 331.0530

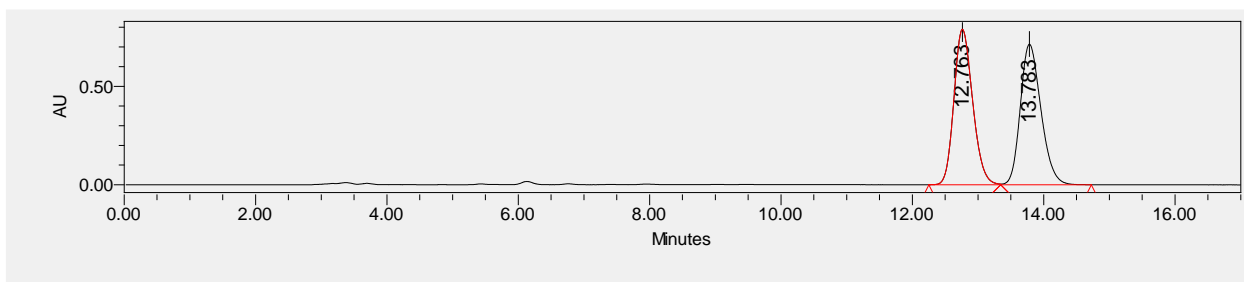

|   | Retention Time | Area     | % Area | Height |
|---|----------------|----------|--------|--------|
| 1 | 12.763         | 15593422 | 50.07  | 789474 |
| 2 | 13.783         | 15551082 | 49.93  | 713779 |

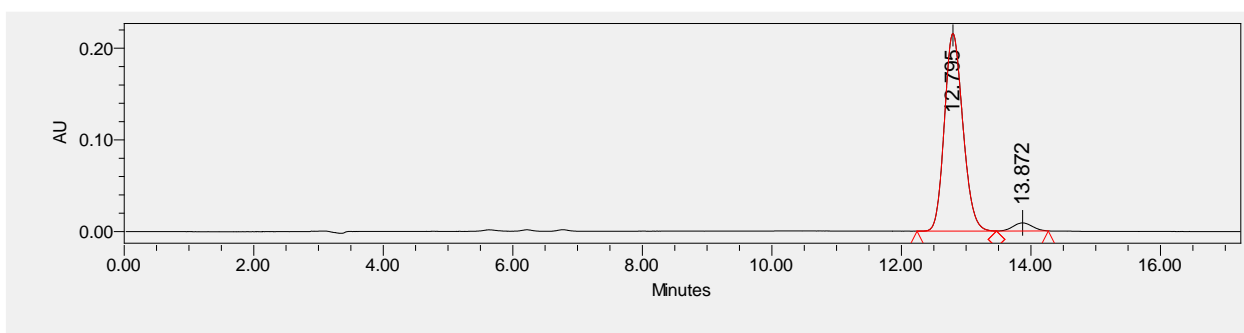

|   | Retention Time | Area    | % Area | Height |
|---|----------------|---------|--------|--------|
| 1 | 12.795         | 4271879 | 95.94  | 215580 |
| 2 | 13.872         | 180764  | 4.06   | 8840   |

## Ethyl (S)-5-allyl-5-(3-methoxyphenyl)-2-oxo-2,5-dihydrofuran-3-carboxylate (C15)

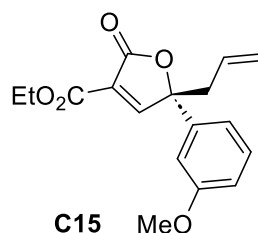

**Results:** colorless oil, 97% yield, 90% ee;  $[\alpha]_D^{23} = -80.4$  ( $c = 1.020$  g/100 mL,  $\lambda = 589$  nm, in DCM), HPLC (Daicel Chiralpak AYH, *n*-hexane/*i*-PrOH 70/30, 1.0 mL/min,  $\lambda = 210$  nm,  $t_{R(\text{minor})} = 9.90$  min,  $t_{R(\text{major})} = 13.18$  min);

**$^1\text{H NMR}$**  (400 MHz, Chloroform-*d*):  $\delta$  8.30 (s, 1H), 7.35 - 7.29 (m, 1H), 6.98 - 6.84 (m, 3H), 5.60 (m, 1H), 5.20 - 5.10 (m, 2H), 4.33 (q,  $J = 7.1$  Hz, 2H), 3.82 (s, 3H), 2.91 (ddt,  $J = 14.3, 7.2, 1.1$  Hz, 1H), 2.81 (ddt,  $J = 14.3, 7.1, 1.1$  Hz, 1H), 1.35 (t,  $J = 7.1$  Hz, 3H);

**$^{13}\text{C}\{^1\text{H}\}$  NMR** (101 MHz, Chloroform-*d*):  $\delta$  166.58, 164.86, 160.06, 160.04, 138.73, 130.10, 129.61, 124.58, 121.21, 117.36, 113.98, 111.05, 87.78, 61.85, 55.42, 43.88, 14.14;

**IR** (film):  $\tilde{\nu}$  ( $\text{cm}^{-1}$ ) 3082, 2982, 2938, 1774, 1721, 1371, 1601, 1293, 1260, 1030, 991, 798, 750, 700;

**ESI-HRMS** calcd for  $[\text{C}_{17}\text{H}_{18}\text{O}_5 + \text{Na}^+]$ : 325.1047, found 325.1042;

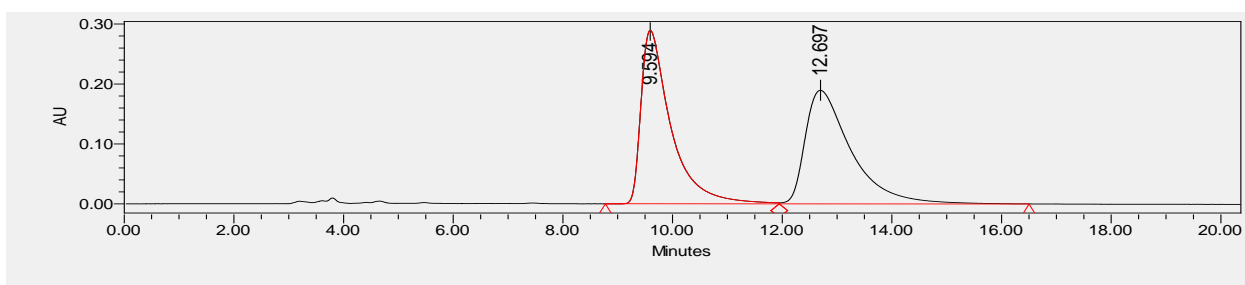

|   | Retention Time | Area     | % Area | Height |
|---|----------------|----------|--------|--------|
| 1 | 9.594          | 10952119 | 49.88  | 289487 |
| 2 | 12.697         | 11003666 | 50.12  | 189564 |

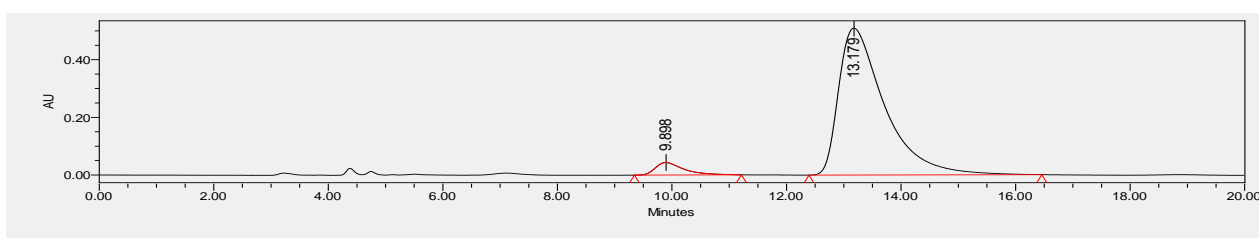

|   | Retention Time | Area     | % Area | Height |
|---|----------------|----------|--------|--------|
| 1 | 9.898          | 1495000  | 5.00   | 43474  |
| 2 | 13.179         | 28376500 | 95.00  | 509270 |

**Ethyl (S)-5-allyl-5-(3-nitrophenyl)-2-oxo-2,5-dihydrofuran-3-carboxylate (C16)**

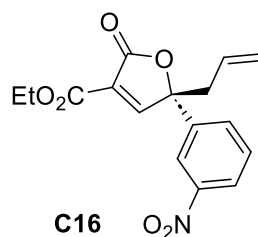

**Results:** colorless oil, 99% yield, 96% ee;  $[\alpha]_D^{23} = -87.1$  ( $c = 0.510$  g/100 mL,  $\lambda = 589$  nm, in DCM), HPLC (Daicel Chiralpak IG, *n*-hexane/*i*-PrOH 80/20, 1.0 mL/min,  $\lambda = 210$  nm,  $t_{R(\text{major})} = 20.07$  min,  $t_{R(\text{minor})} = 23.61$  min);

**$^1\text{H NMR}$**  (400 MHz, Chloroform-*d*):  $\delta$  8.39 (s, 1H), 8.30 – 8.21 (m, 2H), 7.82 - 7.76 (m, 1H), 7.64 (t,  $J = 8.0$  Hz, 1H), 5.68 - 5.55 (m, 1H), 5.25 – 5.13 (m, 2H), 4.35 (q,  $J = 7.2$  Hz, 2H), 2.95 (ddt,  $J = 14.4, 7.5, 1.1$  Hz, 1H), 2.88 (ddt,  $J = 14.3, 6.9, 1.1$  Hz, 1H), 1.37 (t,  $J = 7.1$  Hz, 3H);

**$^{13}\text{C}\{^1\text{H}\}$  NMR** (101 MHz, Chloroform-*d*):  $\delta$  165.82, 163.24, 159.65, 148.45, 139.49, 131.30, 130.33, 128.76, 125.57, 123.74, 122.19, 120.50, 86.96, 62.12, 43.96, 14.11;

**IR** (film):  $\tilde{\nu}$  ( $\text{cm}^{-1}$ ) 3088, 2984, 2922, 1779, 1722, 1530, 1348, 1275, 1259, 1067, 1030, 993, 799, 749, 690;

**ESI-HRMS** calcd for  $[\text{C}_{16}\text{H}_{15}\text{NO}_6 + \text{Na}^+]$ : 340.0792, found 340.0786;

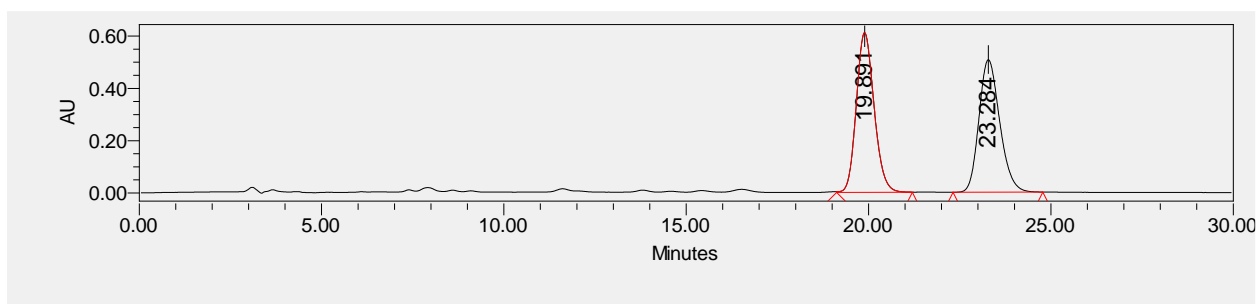

|   | Retention Time | Area     | % Area | Height |
|---|----------------|----------|--------|--------|
| 1 | 19.891         | 20669973 | 50.73  | 610461 |
| 2 | 23.284         | 20075926 | 49.27  | 506762 |

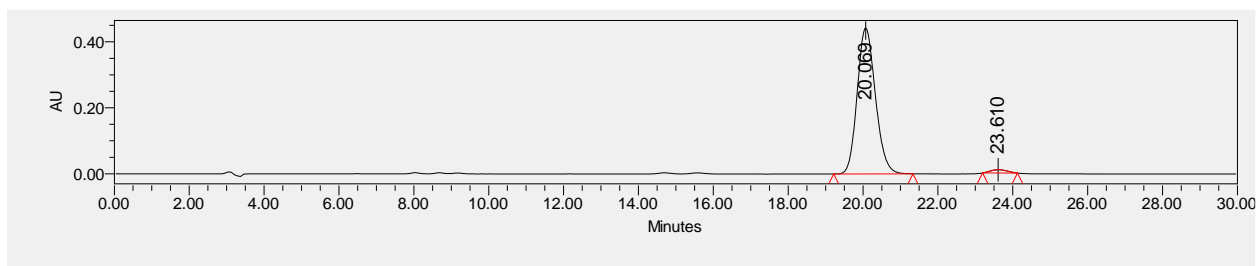

|   | Retention Time | Area     | % Area | Height |
|---|----------------|----------|--------|--------|
| 1 | 20.069         | 14926667 | 97.96  | 442305 |
| 2 | 23.610         | 310644   | 2.04   | 9953   |



## Ethyl (S)-5-allyl-2-oxo-5-(*o*-tolyl)-2,5-dihydrofuran-3-carboxylate (C17)

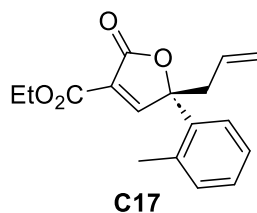

**Results:** colorless oil, 99% yield, 64% ee;  $[\alpha]_D^{23} = -14.1$  ( $c = 1.038$  g/100 mL,  $\lambda = 589$  nm, in DCM), HPLC (Daicel Chiralpak IG, *n*-hexane/*i*-PrOH 70/30, 1.0 mL/min,  $\lambda = 210$  nm,  $t_{R(\text{minor})} = 8.56$  min,  $t_{R(\text{major})} = 9.50$  min);

**$^1\text{H NMR}$**  (400 MHz, Chloroform-*d*):  $\delta$  8.57 (s, 1H), 7.36 – 7.14 (m, 4H), 5.64 – 5.49 (m, 1H), 5.19 – 5.08 (m, 2H), 4.35 (q,  $J = 7.1$  Hz, 2H), 2.96 (ddt,  $J = 14.4, 7.4, 1.1$  Hz, 1H), 2.90 (ddt,  $J = 14.4, 7.1, 1.2$  Hz, 1H), 2.58 (s, 3H), 1.36 (t,  $J = 7.1$  Hz, 3H);

**$^{13}\text{C}\{^1\text{H}\}$  NMR** (101 MHz, Chloroform-*d*):  $\delta$  166.24, 164.26, 160.17, 135.56, 135.11, 133.01, 129.84, 128.81, 126.69, 126.35, 125.37, 121.01, 89.07, 61.88, 42.82, 21.85, 14.16;

**IR** (film):  $\tilde{\nu}$  ( $\text{cm}^{-1}$ ) 3083, 2981, 2917, 2849, 1775, 1722, 1370, 1340, 1314, 1272, 1067, 1027, 799, 763, 725;

**ESI-HRMS** calcd for  $[\text{C}_{17}\text{H}_{18}\text{O}_4 + \text{Na}^+]$ : 309.1098, found 309.1092;

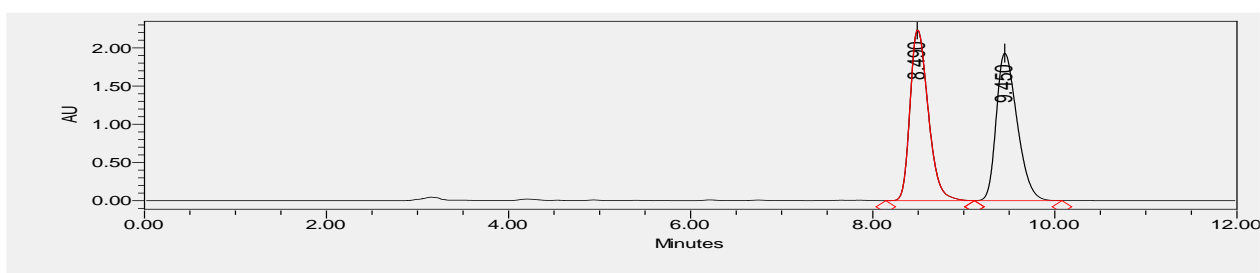

|   | Retention Time | Area     | % Area | Height  |
|---|----------------|----------|--------|---------|
| 1 | 8.490          | 30957931 | 50.14  | 2234624 |
| 2 | 9.450          | 30790944 | 49.86  | 1930321 |

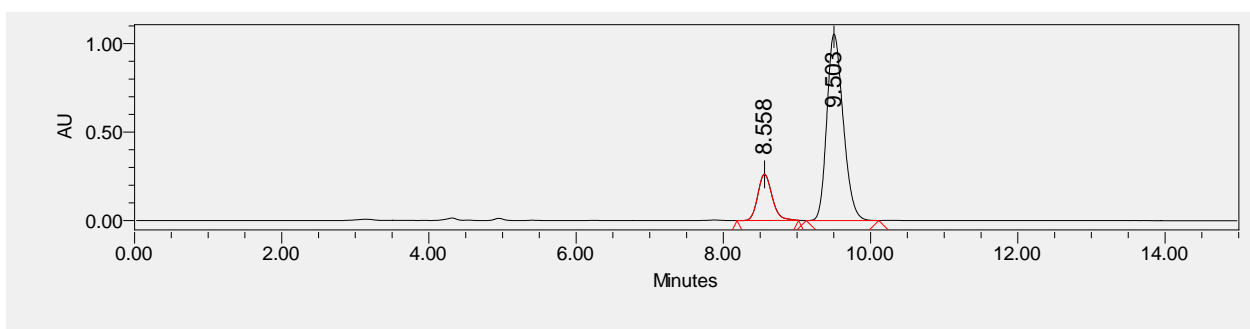

|   | Retention Time | Area     | % Area | Height  |
|---|----------------|----------|--------|---------|
| 1 | 8.558          | 3521507  | 17.78  | 261806  |
| 2 | 9.503          | 16284902 | 82.22  | 1054212 |

**Ethyl (S)-5-allyl-5-(2-(difluoromethoxy)phenyl)-2-oxo-2,5-dihydrofuran-3-carboxylate (C18)**

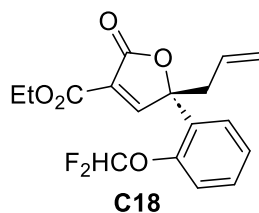

**Results:** colorless oil, 99% yield, 98% ee;  $[\alpha]_D^{23} = -113.2$  ( $c = 0.608$  g/100 mL,  $\lambda = 589$  nm, in DCM), HPLC (Daicel Chiralpak IG, *n*-hexane/*i*-PrOH 80/20, 1.0 mL/min,  $\lambda = 210$  nm,  $t_{R(\text{major})} = 8.33$  min,  $t_{R(\text{minor})} = 9.22$  min);

**$^1\text{H NMR}$**  (400 MHz, Chloroform-*d*):  $\delta$  8.61 (s, 1H), 7.64 (dd,  $J = 7.9, 1.7$  Hz, 1H), 7.44 – 7.33 (m, 1H), 7.23 (td,  $J = 7.7, 1.1$  Hz, 1H), 7.10 (dd,  $J = 8.2, 1.2$  Hz, 1H), 6.69 (t,  $J = 72.9$  Hz, 1H), 5.68 – 5.50 (m, 1H), 5.16 – 5.06 (m, 2H), 4.34 (q,  $J = 7.1$  Hz, 2H), 3.00 (ddt,  $J = 14.4, 7.7, 1.1$  Hz, 1H), 2.84 (ddt,  $J = 14.4, 6.9, 1.2$  Hz, 1H), 1.36 (t,  $J = 7.1$  Hz, 3H);

**$^{13}\text{C}\{^1\text{H}\}$ NMR** (101 MHz, Chloroform-*d*):  $\delta$  166.26, 163.83, 160.06, 147.88 (t,  $J_{F-C} = 2.4$  Hz), 130.46, 129.77, 127.79, 127.63, 125.74, 124.74, 120.97, 116.61, 116.05 (t,  $J_{F-C} = 259.1$  Hz),, 87.03, 61.87, 41.89, 14.11;

**$^{19}\text{F}\{^1\text{H}\}$ NMR** (377 MHz, Chloroform-*d*)  $\delta$  -79.35 ~ -80.31 (m, 2F).

**IR** (film):  $\tilde{\nu}$  ( $\text{cm}^{-1}$ ) 3083, 2985, 2917, 2849, 1784, 1724, 1372, 1339, 1316, 1276, 1226, 1117, 1048, 1030, 799, 762;

**ESI-HRMS** calcd for  $[\text{C}_{17}\text{H}_{16}\text{F}_2\text{O}_5 + \text{Na}^+]$ : 361.0858, found 361.0851;

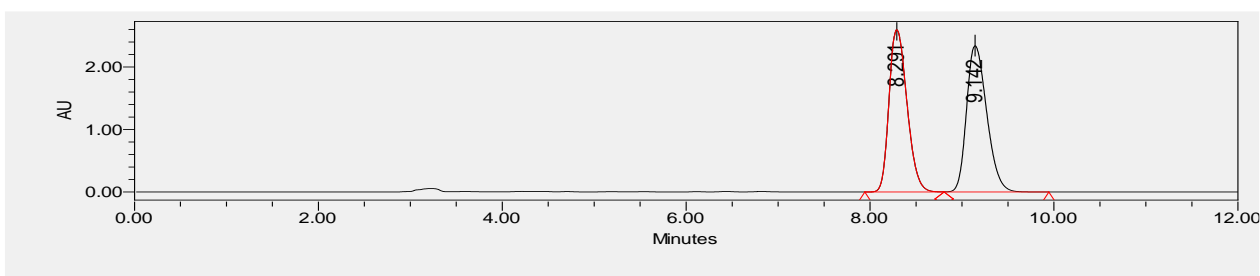

|   | Retention Time | Area     | % Area | Height  |
|---|----------------|----------|--------|---------|
| 1 | 8.291          | 35300426 | 49.69  | 2597170 |
| 2 | 9.142          | 35741795 | 50.31  | 2339275 |

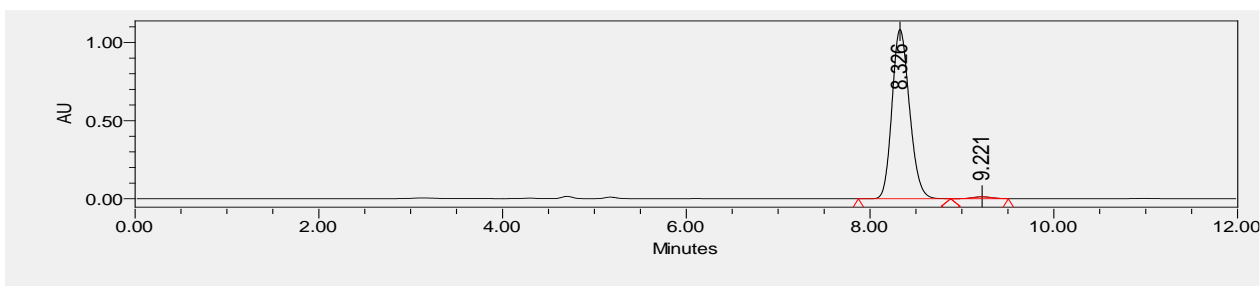

|   | Retention Time | Area     | % Area | Height  |
|---|----------------|----------|--------|---------|
| 1 | 8.326          | 14315531 | 98.81  | 1083674 |
| 2 | 9.221          | 172471   | 1.19   | 12140   |

## Ethyl (S)-5-allyl-5-(2-methoxyphenyl)-2-oxo-2,5-dihydrofuran-3-carboxylate (C19)

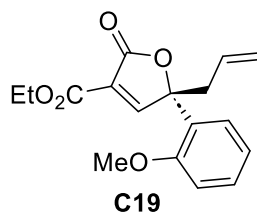

**Results:** colorless oil, 97% yield, 98% ee;  $[\alpha]_D^{23} = -167.8$  ( $c = 0.522$  g/100 mL,  $\lambda = 589$  nm, in DCM), HPLC (Daicel Chiralpak IG, *n*-hexane/*i*-PrOH 70/30, 1.0 mL/min,  $\lambda = 210$  nm,  $t_{R(\text{major})} = 10.42$  min,  $t_{R(\text{minor})} = 11.58$  min);

**$^1\text{H NMR}$**  (400 MHz, Chloroform-*d*):  $\delta$  8.71 (s, 1H), 7.56 – 7.48 (m, 1H), 7.36 – 7.30 (m, 1H), 7.03 – 6.96 (m, 1H), 6.95 – 6.91 (m, 1H), 5.65 – 5.53 (m, 1H), 5.13 – 5.03 (m, 2H), 4.33 (qd,  $J = 7.1, 0.8$  Hz, 2H), 3.94 (s, 3H), 3.00 (ddt,  $J = 14.3, 7.4, 1.1$  Hz, 1H), 2.89 (ddt,  $J = 14.3, 7.0, 1.1$  Hz, 1H), 1.35 (t,  $J = 7.1$  Hz, 3H);

**$^{13}\text{C}\{^1\text{H}\}$  NMR** (101 MHz, Chloroform-*d*):  $\delta$  166.80, 165.37, 160.49, 155.10, 130.44, 130.09, 126.55, 125.51, 124.03, 121.45, 120.38, 111.01, 87.89, 61.69, 55.49, 41.12, 14.17;

**IR** (film):  $\tilde{\nu}$  ( $\text{cm}^{-1}$ ) 3079, 2981, 2918, 2847, 1783, 1723, 1489, 1370, 1336, 1241, 1053, 1030, 799, 756;

**ESI-HRMS** calcd for  $[\text{C}_{17}\text{H}_{18}\text{O}_5 + \text{Na}^+]$ : 325.1047, found 325.1042;

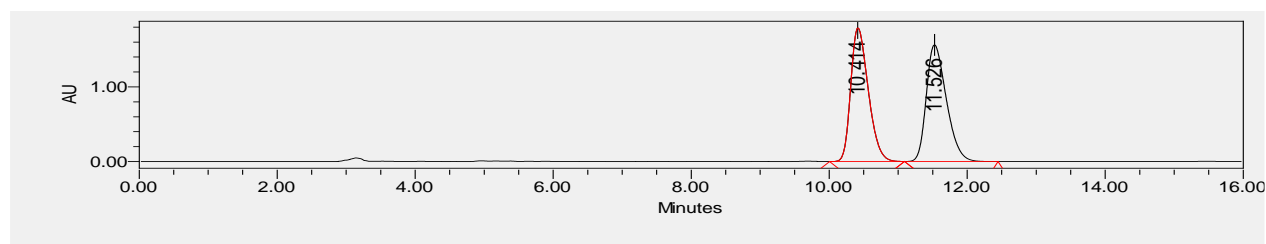

|   | Retention Time | Area     | % Area | Height  |
|---|----------------|----------|--------|---------|
| 1 | 10.414         | 31522259 | 50.00  | 1787290 |
| 2 | 11.526         | 31526418 | 50.00  | 1560743 |

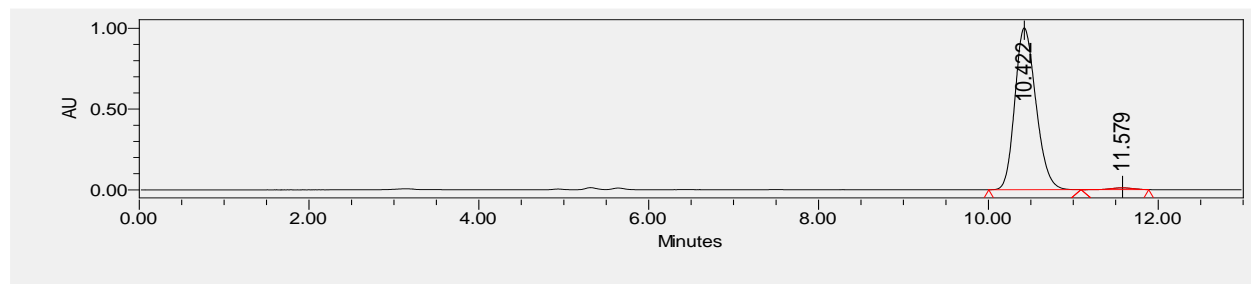

|   | Retention Time | Area     | % Area | Height  |
|---|----------------|----------|--------|---------|
| 1 | 10.422         | 17269510 | 98.85  | 1001910 |
| 2 | 11.579         | 201729   | 1.15   | 11163   |

**Ethyl (S)-5-allyl-5-(2-fluorophenyl)-2-oxo-2,5-dihydrofuran-3-carboxylate (C20)**

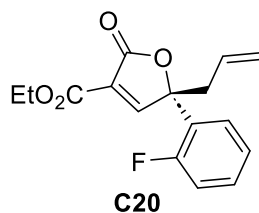

**Results:** colorless oil, 99% yield, 96% ee;  $[\alpha]_D^{23} = -92.6$  ( $c = 0.568$  g/100 mL,  $\lambda = 589$  nm, in DCM), HPLC (Daicel Chiralpak IG, *n*-hexane/*i*-PrOH 80/20, 1.0 mL/min,  $\lambda = 210$  nm,  $t_{R(\text{major})} = 9.33$  min,  $t_{R(\text{minor})} = 9.97$  min);

**$^1\text{H NMR}$**  (400 MHz, Chloroform-*d*):  $\delta$  8.52 (d,  $J = 3.4$  Hz, 1H), 7.57 - 7.51 (m, 1H), 7.40 - 7.32 (m, 1H), 7.21 - 7.16 (m, 1H), 7.14 - 7.07 (m, 1H), 5.68 - 5.53 (m, 1H), 5.18 - 5.06 (m, 2H), 4.34 (q,  $J = 7.2$  Hz, 2H), 3.02 - 2.91 (m, 1H), 2.88 - 2.78 (m, 1H), 1.36 (t,  $J = 7.1$  Hz, 3H);

**$^{13}\text{C}\{^1\text{H}\}$  NMR** (101 MHz, Chloroform-*d*):  $\delta$  166.28, 163.63 (d,  $J_{F-C} = 6.6$  Hz), 159.98, 158.66 (d,  $J_{F-C} = 245.3$  Hz), 130.75 (d,  $J_{F-C} = 8.5$  Hz), 129.49, 127.11 (d,  $J_{F-C} = 3.5$  Hz), 125.13 (d,  $J_{F-C} = 3.2$  Hz), 124.76 (d,  $J_{F-C} = 12.4$  Hz), 124.70, 121.25, 116.06 (d,  $J_{F-C} = 22.1$  Hz), 86.27 (d,  $J_{F-C} = 4.0$  Hz), 61.87, 42.29 (d,  $J_{F-C} = 3.1$  Hz), 14.13;

**$^{19}\text{F}\{^1\text{H}\}$  NMR** (377 MHz, Chloroform-*d*)  $\delta$  -114.18;

**IR** (film):  $\tilde{\nu}$  ( $\text{cm}^{-1}$ ) 3083, 2982, 2920, 2850, 1787, 1724, 1486, 1370, 1337, 1316, 1221, 1039, 1028, 799, 763;

**ESI-HRMS** calcd for  $[\text{C}_{16}\text{H}_{15}\text{FO}_4 + \text{Na}^+]$ : 313.0847, found 313.0842;

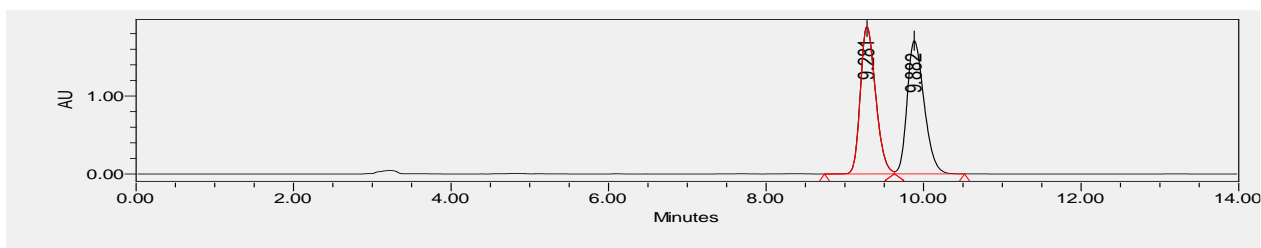

|   | Retention Time | Area     | % Area | Height  |
|---|----------------|----------|--------|---------|
| 1 | 9.281          | 25418216 | 49.90  | 1884810 |
| 2 | 9.882          | 25516042 | 50.10  | 1706978 |

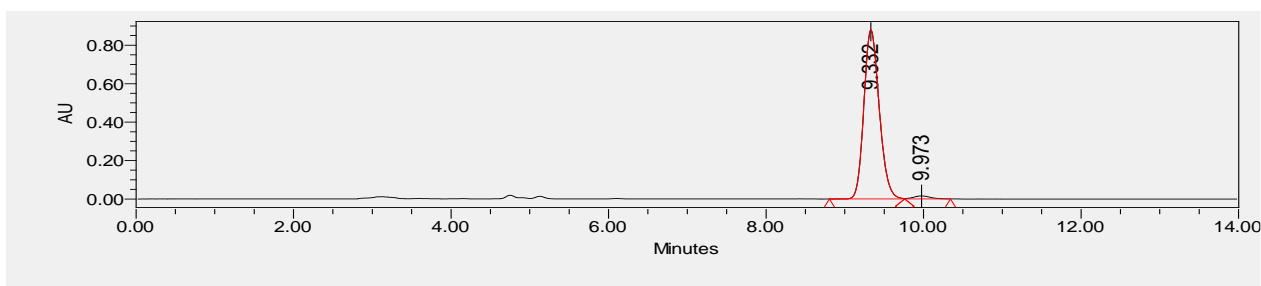

|   | Retention Time | Area     | % Area | Height |
|---|----------------|----------|--------|--------|
| 1 | 9.332          | 11939584 | 98.07  | 879245 |
| 2 | 9.973          | 234902   | 1.93   | 15696  |

## Ethyl (S)-5-allyl-5-(2-nitrophenyl)-2-oxo-2,5-dihydrofuran-3-carboxylate (C21)

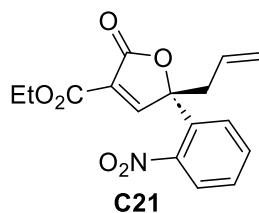

**Results:** colorless oil, 99% yield, 90% ee;  $[\alpha]_D^{19} = +19.5$  ( $c = 0.514$  g/100 mL,  $\lambda = 589$  nm, in DCM), HPLC (Daicel Chiralpak ADH, *n*-hexane/*i*-PrOH 90/10, 1.0 mL/min,  $\lambda = 210$  nm,  $t_{R(\text{major})} = 12.96$  min,  $t_{R(\text{minor})} = 15.77$  min);

**$^1\text{H NMR}$**  (400 MHz, Chloroform-*d*):  $\delta$  8.64 (s, 1H), 7.69 – 7.62 (m, 1H), 7.57 – 7.51 (m, 1H), 5.68 – 5.53 (m, 1H), 5.19 – 5.10 (m, 3H), 4.34 (q,  $J = 7.1$  Hz, 2H), 3.04 (dd,  $J = 14.5, 7.9$  Hz, 1H), 2.91 (dd,  $J = 14.5, 6.6$  Hz, 1H), 1.36 (t,  $J = 7.1$  Hz, 3H);

**$^{13}\text{C}\{^1\text{H}\}$  NMR** (101 MHz, Chloroform-*d*):  $\delta$  165.56, 163.38, 159.72, 148.38, 133.54, 131.04, 130.03, 129.32, 128.47, 125.81, 125.56, 121.77, 87.51, 62.02, 42.17, 14.11;

**IR** (film):  $\tilde{\nu}$  ( $\text{cm}^{-1}$ ) 3089, 2985, 1787, 1725, 1536, 1371, 1260, 1067, 1028, 799, 750;

**ESI-HRMS** calcd for  $[\text{C}_{16}\text{H}_{15}\text{NO}_6 + \text{Na}^+]$ : 340.0792, found 340.0788;

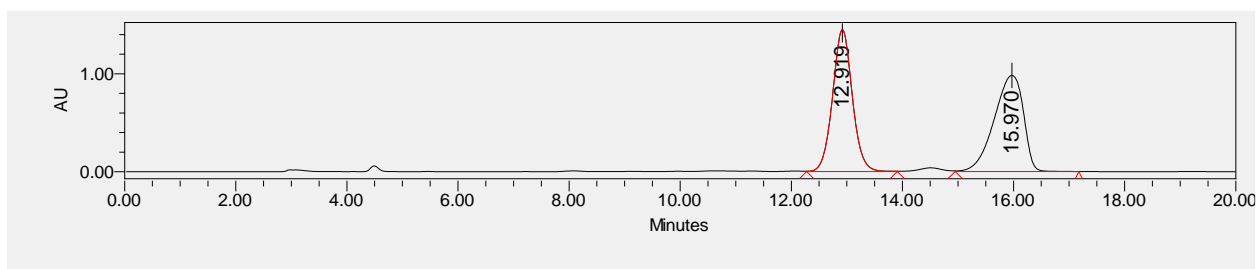

|   | Retention Time | Area     | % Area | Height  |
|---|----------------|----------|--------|---------|
| 1 | 12.919         | 35828677 | 49.94  | 1448734 |
| 2 | 15.970         | 35910994 | 50.06  | 981022  |

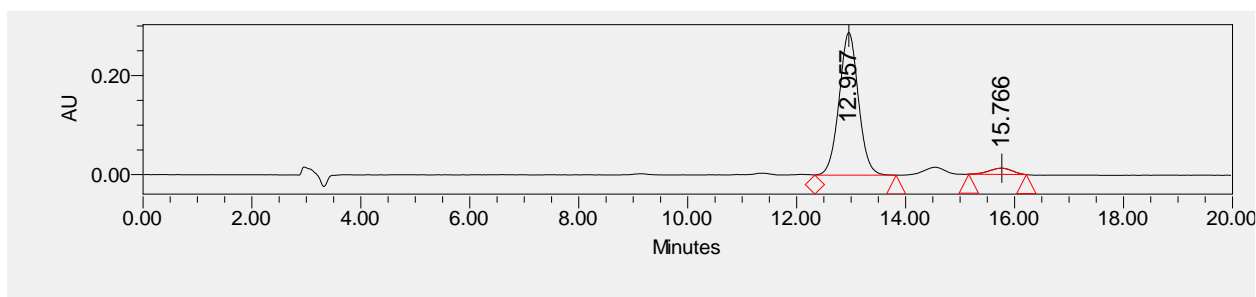

|   | Retention Time | Area    | % Area | Height |
|---|----------------|---------|--------|--------|
| 1 | 12.957         | 7071941 | 95.05  | 287859 |
| 2 | 15.766         | 368598  | 4.95   | 12768  |

## Ethyl (S)-5-allyl-5-(5-fluoro-2-methoxyphenyl)-2-oxo-2,5-dihydrofuran-3-carboxylate (C22)

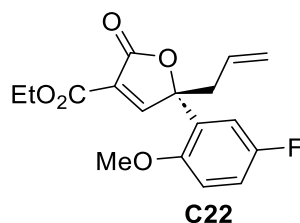

**Results:** colorless oil, 94% yield, 91% ee;  $[\alpha]_D^{23} = -151.3$  ( $c = 0.538$  g/100 mL,  $\lambda = 589$  nm, in DCM), HPLC (Daicel Chiralpak ID, *n*-hexane/*i*-PrOH 80/20, 1.0 mL/min,  $\lambda = 210$  nm,  $t_{R(\text{minor})} = 14.27$  min,  $t_{R(\text{major})} = 15.52$  min);

**$^1\text{H NMR}$**  (400 MHz, Chloroform-*d*):  $\delta$  8.67 (s, 1H), 7.30 – 7.23 (m, 1H), 7.05 – 6.97 (m, 1H), 6.86 (dd,  $J = 9.0, 4.3$  Hz, 1H), 5.65 - 5.51 (m, 1H), 5.13 – 5.03 (m, 2H), 4.33 (qd,  $J = 7.1, 1.3$  Hz, 2H), 3.93 (s, 3H), 2.99 (ddt,  $J = 14.2, 7.5, 1.1$  Hz, 1H), 2.85 (ddt,  $J = 14.2, 7.0, 1.1$  Hz, 1H), 1.36 (t,  $J = 7.1$  Hz, 3H);

**$^{13}\text{C}\{^1\text{H}\}$  NMR** (101 MHz, Chloroform-*d*):  $\delta$  166.39, 164.62, 160.33, 157.23 (d,  $J_{F-C} = 240.4$  Hz), 151.18 (d,  $J_{F-C} = 2.2$  Hz), 130.07, 127.08 (d,  $J_{F-C} = 7.2$  Hz), 124.38, 120.71, 115.88 (d,  $J_{F-C} = 23.0$  Hz), 114.03 (d,  $J_{F-C} = 26.3$  Hz), 111.94 (d,  $J_{F-C} = 8.0$  Hz), 87.29, 61.80, 56.00, 40.97, 14.15;

**IR** (film):  $\tilde{\nu}$  ( $\text{cm}^{-1}$ ) 2982, 1786, 1725, 1496, 1274, 1249, 1031, 799, 749;

**ESI-HRMS** calcd for  $[\text{C}_{17}\text{H}_{17}\text{FO}_5 + \text{Na}^+]$ : 343.0953, found 343.0947;

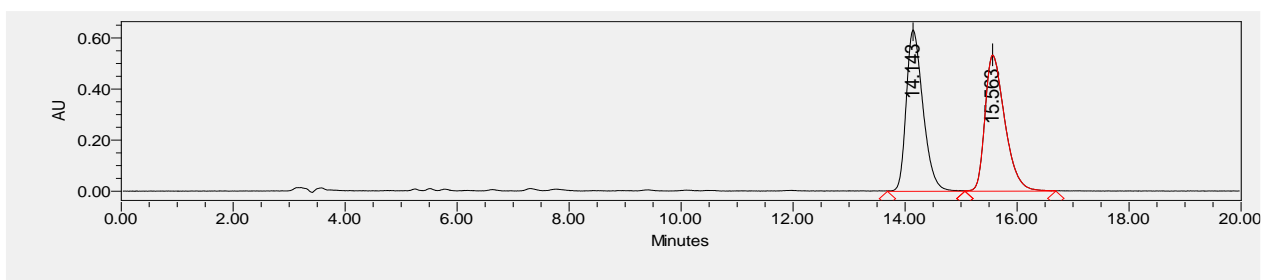

|   | Retention Time | Area     | % Area | Height |
|---|----------------|----------|--------|--------|
| 1 | 14.143         | 13123174 | 50.04  | 632365 |
| 2 | 15.563         | 13104752 | 49.96  | 533807 |

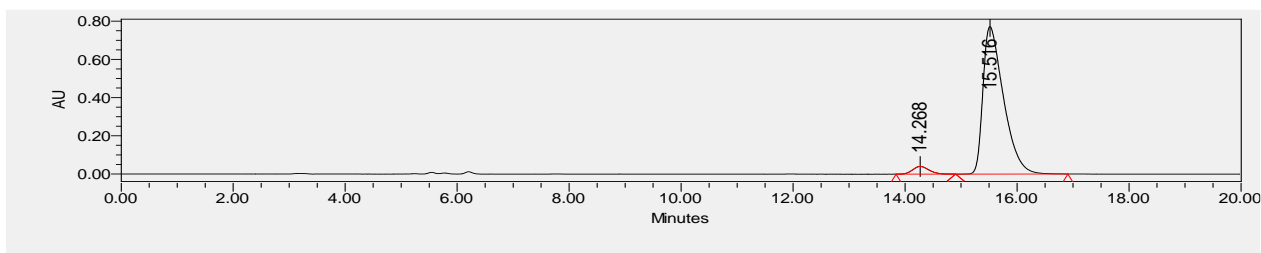

|   | Retention Time | Area     | % Area | Height |
|---|----------------|----------|--------|--------|
| 1 | 14.268         | 821756   | 4.01   | 40510  |
| 2 | 15.516         | 19655736 | 95.99  | 772038 |

**Ethyl (S)-5-allyl-5-(5-fluoro-2-methoxyphenyl)-2-oxo-2,5-dihydrofuran-3-carboxylate (C23)**

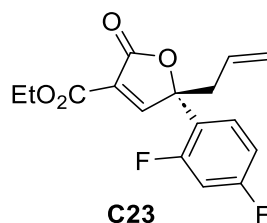

**Results:** colorless oil, 99% yield, 98% ee;  $[\alpha]_D^{23} = -91.3$  ( $c = 0.528$  g/100 mL,  $\lambda = 589$  nm, in DCM), HPLC (Daicel Chiralpak IG, *n*-hexane/*i*-PrOH 80/20, 1.0 mL/min,  $\lambda = 210$  nm,  $t_{R(\text{major})} = 8.48$  min,  $t_{R(\text{minor})} = 9.30$  min);

**$^1\text{H}$  NMR** (400 MHz, Chloroform-*d*):  $\delta$  8.48 (d,  $J = 3.5$  Hz, 1H), 7.53 (td,  $J = 8.8, 6.2$  Hz, 1H), 7.04 – 6.77 (m, 2H), 5.67 – 5.52 (m, 1H), 5.18 – 5.08 (m, 2H), 4.34 (q,  $J = 7.1$  Hz, 2H), 2.98 – 2.87 (m, 1H), 2.85 – 2.74 (m, 1H), 1.36 (t,  $J = 7.1$  Hz, 3H);

**$^{13}\text{C}\{^1\text{H}\}$  NMR** (101 MHz, Chloroform-*d*):  $\delta$  166.03, 164.44 (d,  $J_{F-C} = 12.3$  Hz), 163.24 (d,  $J_{F-C} = 6.5$  Hz), 161.94 (d,  $J_{F-C} = 12.2$  Hz), 159.99 (d,  $J_{F-C} = 11.9$  Hz), 159.88, 157.52 (d,  $J_{F-C} = 11.9$  Hz), 129.28, 128.31 (dd,  $J_{F-C} = 9.7, 5.2$  Hz), 124.90, 121.45, 120.88 (dd,  $J_{F-C} = 12.9, 3.9$  Hz), 112.25 (dd,  $J_{F-C} = 21.2, 3.4$  Hz), 104.63 (t,  $J_{F-C} = 26.0$  Hz), 85.88 (d,  $J_{F-C} = 4.2$  Hz), 61.95, 42.39 (d,  $J_{F-C} = 3.0$  Hz), 14.12;

**$^{19}\text{F}$  NMR** (377 MHz, Chloroform-*d*)  $\delta$  -108.53 (d,  $J = 7.9$  Hz), -110.26 (d,  $J = 8.2$  Hz);

**IR** (film):  $\tilde{\nu}$  ( $\text{cm}^{-1}$ ) 3083, 2985, 2928, 1788, 1724, 1501, 1299, 1275, 1030, 799, 750;

**ESI-HRMS** calcd for  $[\text{C}_{16}\text{H}_{14}\text{F}_2\text{O}_4 + \text{Na}^+]$ : 331.0753, found 331.0746;

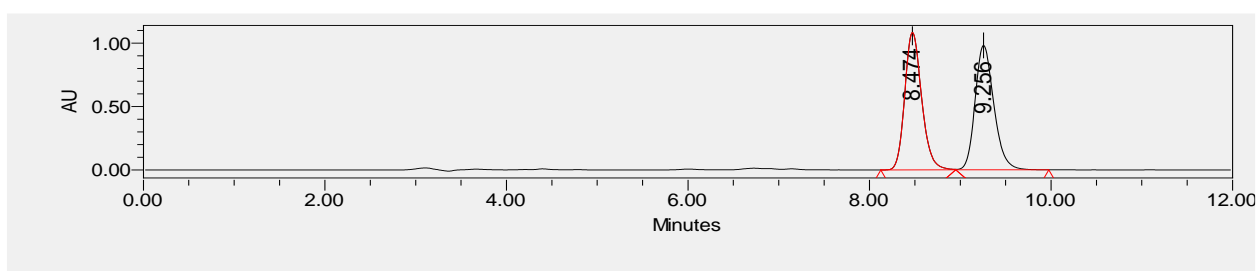

|   | Retention Time | Area     | % Area | Height  |
|---|----------------|----------|--------|---------|
| 1 | 8.474          | 14032262 | 49.92  | 1083078 |
| 2 | 9.256          | 14075757 | 50.08  | 980285  |

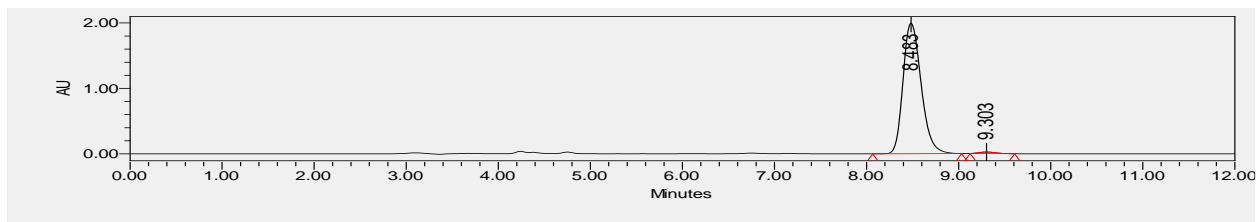

|   | Retention Time | Area     | % Area | Height  |
|---|----------------|----------|--------|---------|
| 1 | 8.483          | 27208458 | 98.92  | 1994188 |
| 2 | 9.303          | 297675   | 1.08   | 23586   |

**Ethyl (S)-5-allyl-5-(2,5-dimethoxyphenyl)-2-oxo-2,5-dihydrofuran-3-carboxylate (C24)**

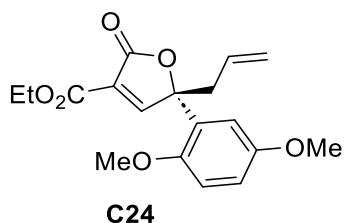

**Results:** colorless oil, 90% yield, 84% ee;  $[\alpha]_D^{23} = -100.3$  ( $c = 0.574$  g/100 mL,  $\lambda = 589$  nm, in DCM), HPLC (Daicel Chiralpak IG, *n*-hexane/*i*-PrOH 70/30, 1.0 mL/min,  $\lambda = 210$  nm,  $t_{R(\text{major})} = 11.86$  min,  $t_{R(\text{minor})} = 15.98$  min);

**$^1\text{H NMR}$**  (400 MHz, Chloroform-*d*):  $\delta$  8.69 (s, 1H), 7.10 – 7.07 (m, 1H), 6.88 – 6.82 (m, 2H), 5.66 – 5.51 (m, 1H), 5.14 – 5.04 (m, 2H), 4.33 (qd,  $J = 7.1, 1.1$  Hz, 2H), 3.89 (s, 3H), 3.76 (s, 3H), 2.99 (ddt,  $J = 14.3, 7.3, 1.1$  Hz, 1H), 2.88 (ddt,  $J = 14.3, 7.1, 1.1$  Hz, 1H), 1.35 (t,  $J = 7.1$  Hz, 3H). ;

**$^{13}\text{C}\{^1\text{H}\}$  NMR** (101 MHz, Chloroform-*d*):  $\delta$  166.76, 165.27, 160.45, 154.06, 149.12, 130.35, 126.27, 124.02, 120.46, 114.87, 112.10, 112.05, 87.75, 61.70, 55.84, 41.11, 29.71, 14.16;

**IR** (film):  $\tilde{\nu}$  (cm<sup>-1</sup>) 2980, 2917, 2837, 1783, 1724, 1498, 1277, 1224, 1032, 799, 749;

**ESI-HRMS** calcd for [C<sub>18</sub>H<sub>20</sub>O<sub>6</sub>+Na<sup>+</sup>]: 355.1153, found 355.1147;

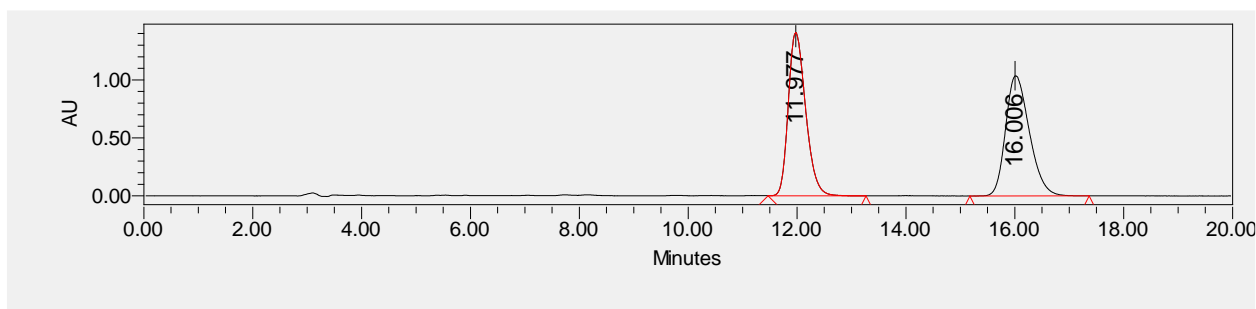

|   | Retention Time | Area     | % Area | Height  |
|---|----------------|----------|--------|---------|
| 1 | 11.977         | 31246040 | 49.80  | 1409772 |
| 2 | 16.006         | 31497367 | 50.20  | 1037208 |

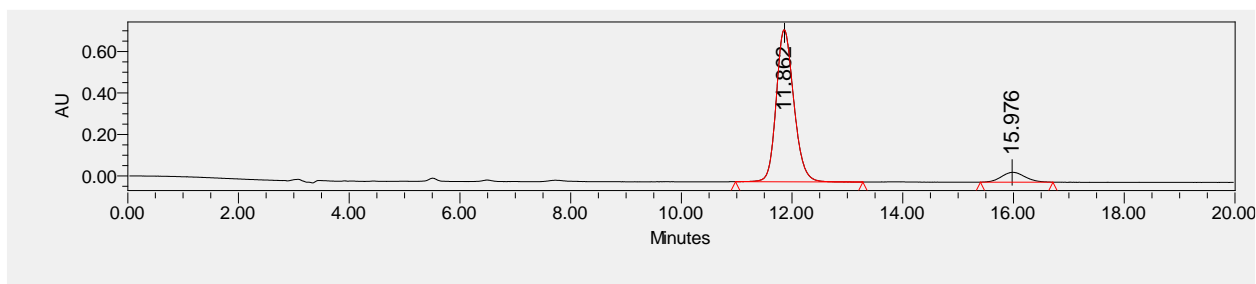

|   | Retention Time | Area     | % Area | Height |
|---|----------------|----------|--------|--------|
| 1 | 11.862         | 16180919 | 92.00  | 733742 |
| 2 | 15.976         | 1407213  | 8.00   | 47642  |



## Ethyl (S)-5-allyl-2-oxo-5-(thiophen-2-yl)-2,5-dihydrofuran-3-carboxylate (C25)

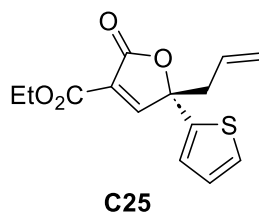

**Results:** colorless oil, 99% yield, 81% ee;  $[\alpha]_D^{23} = -39.1$  ( $c = 1.040$  g/100 mL,  $\lambda = 589$  nm, in DCM), HPLC (Daicel Chiralpak IG, *n*-hexane/*i*-PrOH 70/30, 1.0 mL/min,  $\lambda = 210$  nm,  $t_{R(\text{minor})} = 12.85$  min,  $t_{R(\text{major})} = 14.24$  min);

**$^1\text{H NMR}$**  (400 MHz, Chloroform-*d*):  $\delta$  8.21 (s, 1H), 7.35 (dd,  $J = 4.9, 1.4$  Hz, 1H), 7.07 – 6.99 (m, 2H), 5.72 – 5.57 (m, 1H), 5.25 – 5.16 (m, 2H), 4.35 (q,  $J = 7.1$  Hz, 2H), 2.99 (dq,  $J = 14.3, 7.2$  Hz, 2H), 1.37 (t,  $J = 7.1$  Hz, 3H);

**$^{13}\text{C}\{^1\text{H}\}$  NMR** (101 MHz, Chloroform-*d*):  $\delta$  166.16, 163.75, 159.95, 139.53, 129.30, 127.35, 126.47, 125.39, 124.96, 121.65, 85.63, 61.97, 43.69, 14.13;

**IR** (film):  $\tilde{\nu}$  ( $\text{cm}^{-1}$ ) 3083, 2982, 2917, 2837, 1777, 1722, 1641, 1370, 1336, 1311, 1252, 1062, 1024, 799, 708;

**ESI-HRMS** calcd for  $[\text{C}_{14}\text{H}_{14}\text{O}_4\text{S} + \text{Na}^+]$ : 301.0505, found 301.0503;

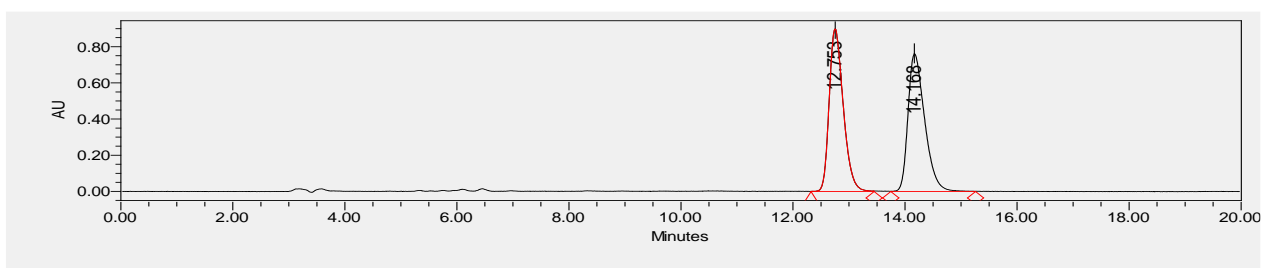

|   | Retention Time | Area     | % Area | Height |
|---|----------------|----------|--------|--------|
| 1 | 12.753         | 15677683 | 49.88  | 898878 |
| 2 | 14.168         | 15755163 | 50.12  | 764329 |

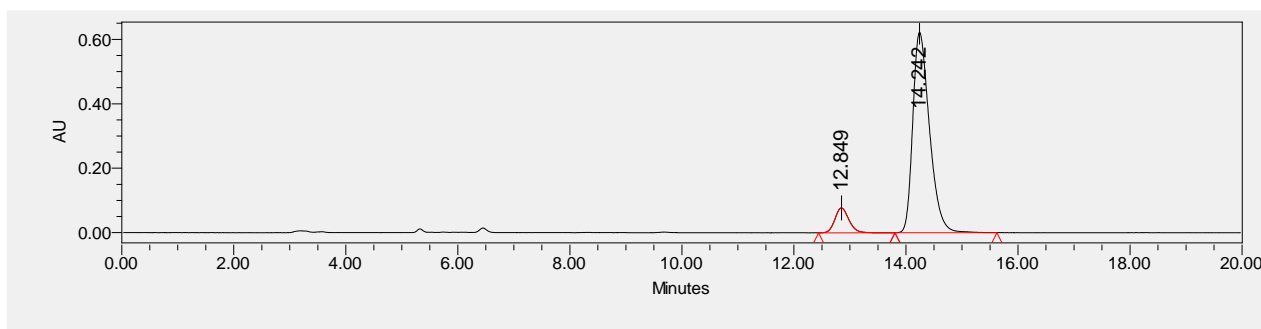

|   | Retention Time | Area     | % Area | Height |
|---|----------------|----------|--------|--------|
| 1 | 12.849         | 1349241  | 9.48   | 77479  |
| 2 | 14.242         | 12882167 | 90.52  | 622682 |

**Ethyl (S)-5-allyl-5-(naphthalen-2-yl)-2-oxo-2,5-dihydrofuran-3-carboxylate (C26)**

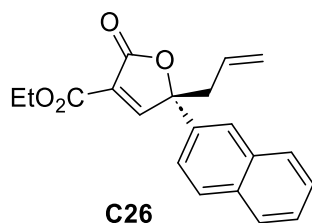

**Results:** white solid, 99% yield, 90% ee;  $[\alpha]_D^{23} = -107.8$  ( $c = 0.476$  g/100 mL,  $\lambda = 589$  nm, in DCM), HPLC (Daicel Chiralpak OXH, *n*-hexane/*i*-PrOH 80/20, 1.0 mL/min,  $\lambda = 210$  nm,  $t_{R(\text{major})} = 10.74$  min,  $t_{R(\text{minor})} = 12.24$  min);

**$^1\text{H NMR}$**  (400 MHz, Chloroform-*d*):  $\delta$  8.44 (s, 1H), 7.92 – 7.79 (m, 4H), 7.57 – 7.43 (m, 3H), 5.70 – 5.56 (m, 1H), 5.22 – 5.11 (m, 2H), 4.34 (q,  $J = 7.1$  Hz, 2H), 3.01 (ddt,  $J = 14.4, 7.3, 1.2$  Hz, 1H), 2.93 (ddt,  $J = 14.3, 7.0, 1.1$  Hz, 1H), 1.35 (t,  $J = 7.1$  Hz, 3H);

**$^{13}\text{C}\{^1\text{H}\}$  NMR** (101 MHz, Chloroform-*d*):  $\delta$  166.68, 164.93, 160.09, 134.43, 133.09, 132.99, 129.65, 129.03, 128.25, 127.70, 126.94, 126.91, 124.74, 124.51, 122.56, 121.29, 88.09, 61.89, 43.75, 14.15;

**IR** (film):  $\tilde{\nu}$  ( $\text{cm}^{-1}$ ) 3082, 2983, 2931, 1777, 1722, 1641, 1370, 1275, 1260, 1069, 1032, 994, 800, 750;

**ESI-HRMS** calcd for  $[\text{C}_{20}\text{H}_{18}\text{O}_4 + \text{Na}^+]$ : 345.1098, found 345.1092;

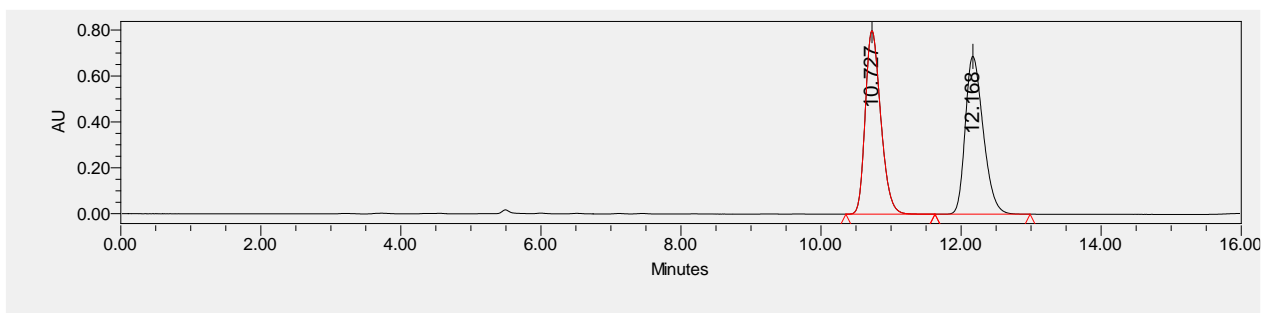

|   | Retention Time | Area     | % Area | Height |
|---|----------------|----------|--------|--------|
| 1 | 10.727         | 12255389 | 50.05  | 799245 |
| 2 | 12.168         | 12233299 | 49.95  | 687564 |

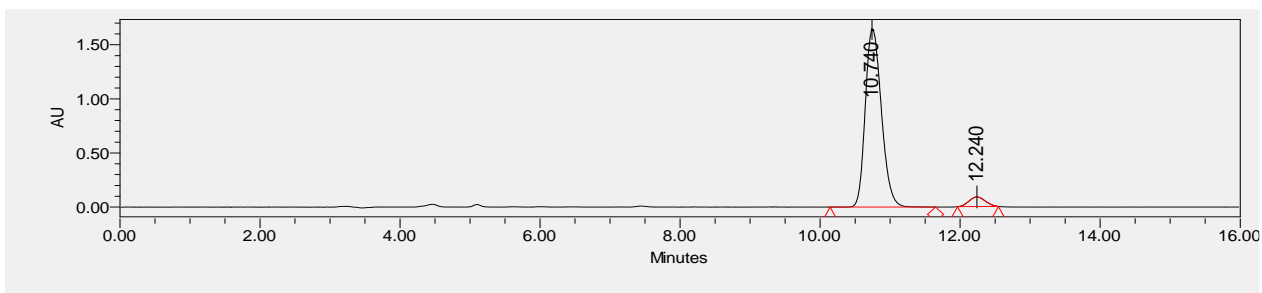

|   | Retention Time | Area     | % Area | Height  |
|---|----------------|----------|--------|---------|
| 1 | 10.740         | 26361096 | 94.82  | 1650524 |
| 2 | 12.240         | 1439308  | 5.18   | 89778   |

## Ethyl (S)-5-allyl-5-methyl-2-oxo-2,5-dihydrofuran-3-carboxylate (C27)

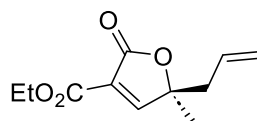

**C27**

**Results:** colorless oil, 99% yield, 68% ee;  $[\alpha]^{24}_{\text{D}} = +22.8$  ( $c = 0.316$  g/100 mL,  $\lambda = 589$  nm, in DCM), HPLC (Daicel Chiralpak AZH, *n*-hexane/*i*-PrOH 85/15, 1.0 mL/min,  $\lambda = 210$  nm,  $t_{\text{R}}(\text{minor}) = 10.64$  min,  $t_{\text{R}}(\text{major}) = 11.24$  min;

$^1\text{H NMR}$  (400 MHz, Chloroform-*d*):  $\delta$  8.05 (s, 1H), 5.66 (ddt,  $J = 17.5, 10.3, 7.3$  Hz, 1H), 5.20 – 5.11 (m, 2H), 4.32 (q,  $J = 7.1$  Hz, 2H), 2.53 (dt,  $J = 7.4, 1.1$  Hz, 1H), 1.50 (s, 3H), 1.35 (t,  $J = 7.1$  Hz, 3H);

$^{13}\text{C}\{^1\text{H}\}$  NMR (101 MHz, Chloroform-*d*):  $\delta$  166.75, 166.33, 160.22, 130.23, 125.33, 120.93, 85.26, 61.77, 42.63, 23.13, 14.13;

IR (film):  $\tilde{\nu}$  ( $\text{cm}^{-1}$ ) 3082, 2984, 2919, 1776, 1722, 1642, 1450, 1338, 1314, 1275, 1260, 1036, 800, 764, 750;

ESI-HRMS calcd for  $[\text{C}_{11}\text{H}_{14}\text{O}_4 + \text{Na}^+]$ : 233.0785, found 233.0782;

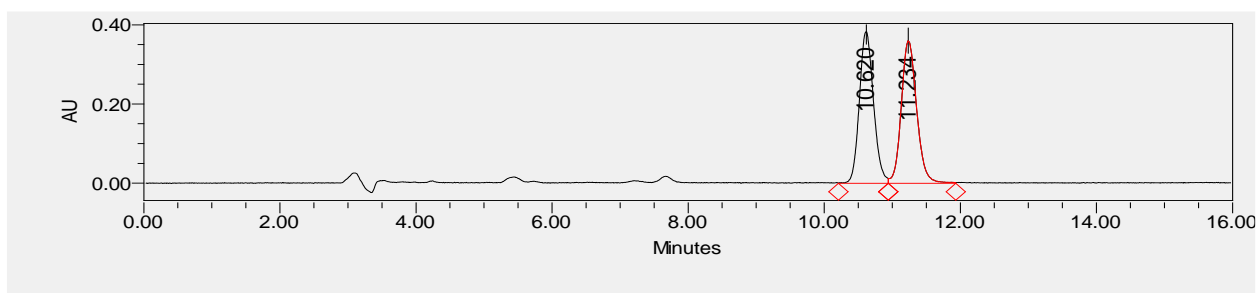

|   | Retention Time | Area    | % Area | Height |
|---|----------------|---------|--------|--------|
| 1 | 10.620         | 5531467 | 49.48  | 382856 |
| 2 | 11.234         | 5647411 | 50.52  | 360186 |

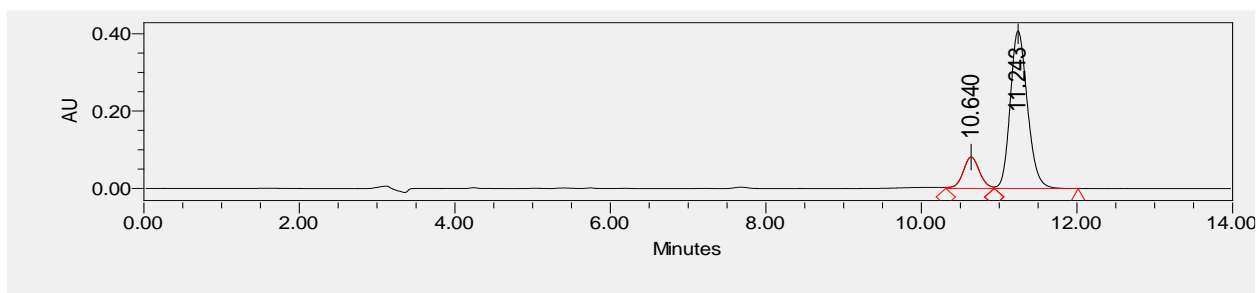

|   | Retention Time | Area    | % Area | Height |
|---|----------------|---------|--------|--------|
| 1 | 10.640         | 1193109 | 16.00  | 81434  |
| 2 | 11.243         | 6264700 | 84.00  | 407738 |

## Ethyl (*R*)-5-allyl-5-cyclopropyl-2-oxo-2,5-dihydrofuran-3-carboxylate (C28)

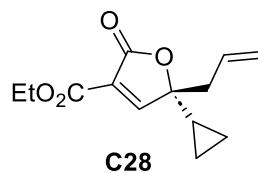

**Results:** colorless oil, 99% yield, 86% *ee*;  $[\alpha]_D^{24} = +24.6$  ( $c = 0.390$  g/100 mL,  $\lambda = 589$  nm, in DCM), HPLC (Daicel Chiralpak IC, *n*-hexane/*i*-PrOH 95/5, 1.0 mL/min,  $\lambda = 210$  nm,  $t_{R(\text{major})} = 57.79$  min,  $t_{R(\text{minor})} = 62.72$  min);

**$^1\text{H NMR}$**  (400 MHz, Chloroform-*d*):  $\delta$  8.02 (s, 1H), 5.78 – 5.62 (m, 1H), 5.23 – 5.13 (m, 2H), 4.34 (q,  $J = 7.1$  Hz, 2H), 2.67 (d,  $J = 7.3$  Hz, 1H), 1.37 (t,  $J = 7.1$  Hz, 3H), 0.66 – 0.43 (m, 3H), 0.31 – 0.21 (m, 1H);

**$^{13}\text{C}\{^1\text{H}\}$  NMR** (101 MHz, Chloroform-*d*):  $\delta$  166.09, 164.45, 159.28, 129.33, 124.60, 119.85, 85.30, 60.93, 41.14, 15.88, 13.29, 1.16, 0.00;

**IR** (film):  $\tilde{\nu}$  ( $\text{cm}^{-1}$ ) 3082, 3006, 2986, 2917, 2349, 1777, 1722, 1275, 1260, 1048, 995, 764, 750;

**ESI-HRMS** calcd for  $[\text{C}_{13}\text{H}_{16}\text{O}_4 + \text{Na}^+]$ : 259.0941, found 259.0938;

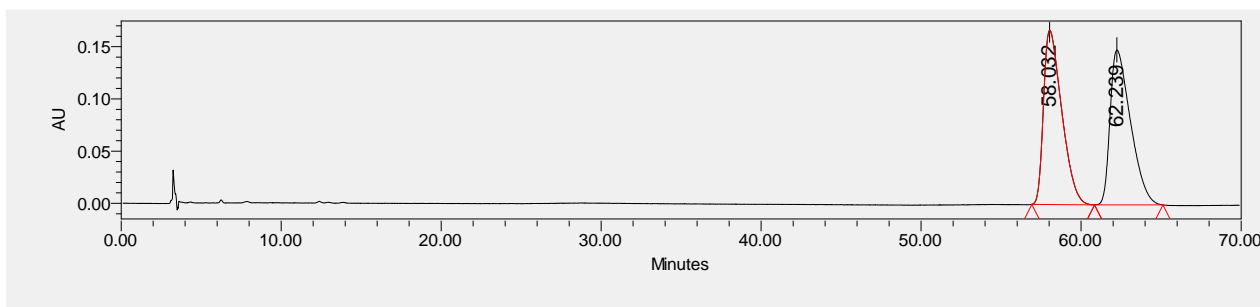

|   | Retention Time | Area     | % Area | Height |
|---|----------------|----------|--------|--------|
| 1 | 58.032         | 13207767 | 50.09  | 167089 |
| 2 | 62.239         | 13161258 | 49.91  | 148402 |

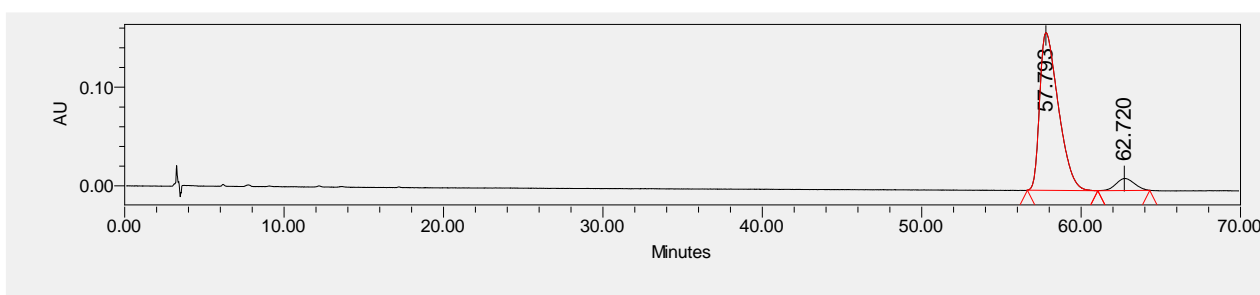

|   | Retention Time | Area     | % Area | Height |
|---|----------------|----------|--------|--------|
| 1 | 57.793         | 12998197 | 92.98  | 159771 |
| 2 | 62.720         | 982096   | 7.02   | 12190  |

## Diethyl (S)-2-allyl-5-oxo-2,5-dihydrofuran-2,4-dicarboxylate (C29)

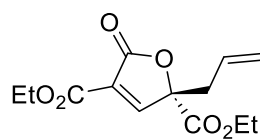

**C29**

**Results:** colorless oil, 97% yield, 81% ee;  $[\alpha]_D^{24} = -80.6$  ( $c = 0.360$  g/100 mL,  $\lambda = 589$  nm, in DCM), HPLC (Daicel Chiralpak IC, *n*-hexane/*i*-PrOH 70/30, 1.0 mL/min,  $\lambda = 210$  nm,  $t_{R(\text{major})} = 21.51$  min,  $t_{R(\text{minor})} = 26.58$  min);

**$^1\text{H NMR}$**  (400 MHz, Chloroform-*d*):  $\delta$  8.08 (s, 1H), 5.73 – 5.61 (m, 1H), 5.28 – 5.18 (m, 2H), 4.35 (q,  $J = 7.1$  Hz, 2H), 4.26 (q,  $J = 7.1$  Hz, 3H), 2.92 (dd,  $J = 14.2, 7.6$  Hz, 1H), 2.77 (dd,  $J = 14.3, 6.9$  Hz, 1H), 1.37 (t,  $J = 7.1$  Hz, 3H), 1.31 (t,  $J = 7.2$  Hz, 3H);

**$^{13}\text{C}\{^1\text{H}\}$  NMR** (101 MHz, Chloroform-*d*):  $\delta$  166.08, 165.81, 160.18, 159.50, 128.53, 126.55, 121.92, 86.56, 63.18, 62.08, 39.74, 14.09, 14.07;

**IR** (film):  $\tilde{\nu}$  ( $\text{cm}^{-1}$ ) 3087, 2985, 2937, 1792, 1722, 1643, 1370, 1336, 1259, 1032, 764, 750;

**ESI-HRMS** calcd for  $[\text{C}_{13}\text{H}_{16}\text{O}_6 + \text{Na}^+]$ : 291.0840, found 291.0834;

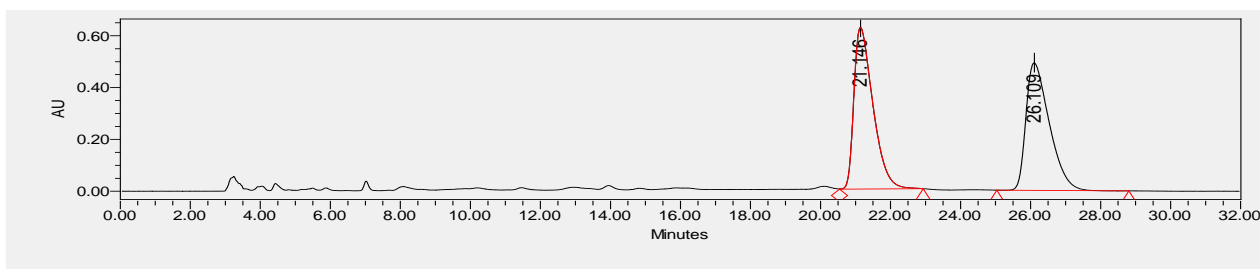

|   | Retention Time | Area     | % Area | Height |
|---|----------------|----------|--------|--------|
| 1 | 21.146         | 23500919 | 50.79  | 624252 |
| 2 | 26.109         | 22768981 | 49.21  | 492343 |

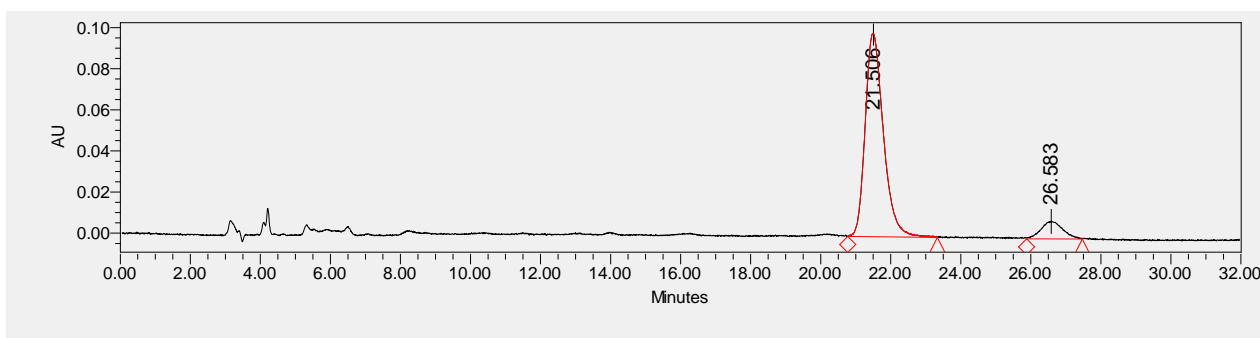

|   | Retention Time | Area    | % Area | Height |
|---|----------------|---------|--------|--------|
| 1 | 21.506         | 3566549 | 90.64  | 99022  |
| 2 | 26.583         | 368120  | 9.36   | 8504   |

**tert-Butyl (R)-4-(2-allyl-4-(ethoxycarbonyl)-5-oxo-2,5-dihydrofuran-2-yl)piperidine-1-carboxylate (C30)**

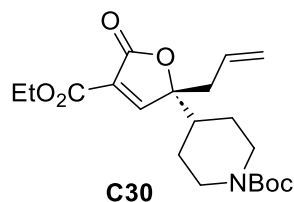

**Results:** colorless oil, 88% yield, 86% ee;  $[\alpha]^{24}_D = -19.6$  ( $c = 0.628$  g/100 mL,  $\lambda = 589$  nm, in DCM), HPLC (Daicel Chiralpak IC, *n*-hexane/*i*-PrOH 70/30, 1.0 mL/min,  $\lambda = 210$  nm,  $t_{R(\text{minor})} = 31.46$  min,  $t_{R(\text{major})} = 42.03$  min);

**$^1\text{H NMR}$**  (400 MHz, Chloroform-*d*):  $\delta$  8.03 (s, 1H), 5.68 - 5.56 (m, 1H), 5.23 - 5.12 (m, 2H), 4.34 (q,  $J = 7.1$  Hz, 2H), 4.19 (s, 3H), 2.69 - 2.50 (m, 4H), 2.03 - 1.91 (m, 1H), 1.85 - 1.62 (m, 2H), 1.45 (s, 9H), 1.37 (t,  $J = 7.1$  Hz, 3H), 1.33 - 1.22 (m, 3H);

**$^{13}\text{C}\{^1\text{H}\}$  NMR** (101 MHz, Chloroform-*d*):  $\delta$  166.64, 164.60, 159.87, 154.46, 129.63, 126.64, 121.12, 89.20, 79.80, 61.87, 42.13, 38.80, 28.41, 26.84, 26.05, 14.13;

**IR** (film):  $\tilde{\nu}$  ( $\text{cm}^{-1}$ ) 2982, 1778, 1689, 1425, 1275, 1260, 1167, 764, 750;

**ESI-HRMS** calcd for  $[\text{C}_{20}\text{H}_{29}\text{NO}_6 + \text{Na}^+]$ : 402.1888, found 402.1881;

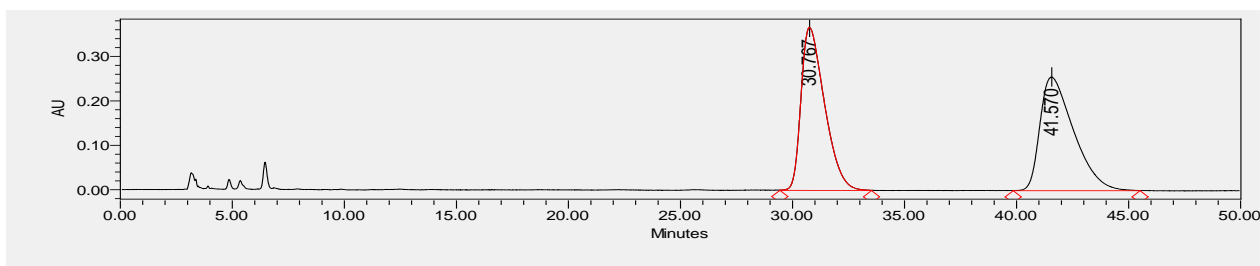

|   | Retention Time | Area     | % Area | Height |
|---|----------------|----------|--------|--------|
| 1 | 30.767         | 26731085 | 50.02  | 366964 |
| 2 | 41.570         | 26706821 | 49.98  | 255823 |

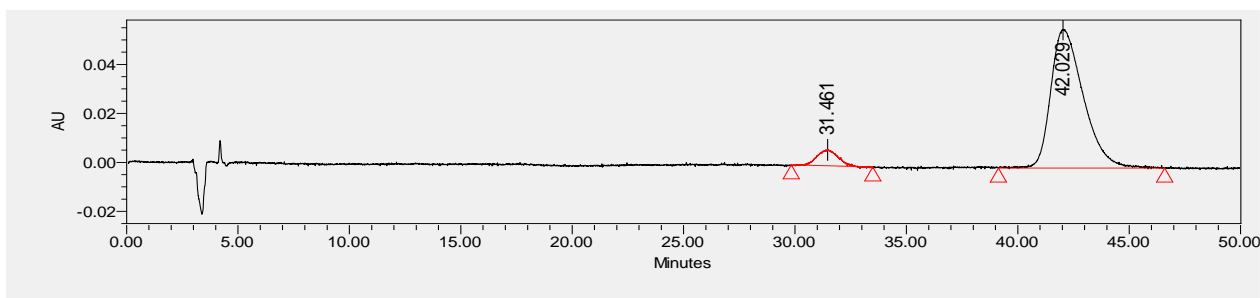

|   | Retention Time | Area    | % Area | Height |
|---|----------------|---------|--------|--------|
| 1 | 31.461         | 431040  | 6.97   | 6541   |
| 2 | 42.029         | 5755563 | 93.03  | 56630  |

## Ethyl (S,E)-5-(but-2-en-1-yl)-2-oxo-5-phenyl-2,5-dihydrofuran-3-carboxylate (C31)

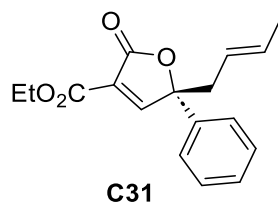

**Results:** colorless oil, 99% yield, 95% ee;  $[\alpha]_D^{24} = -75.4$  ( $c = 0.516$  g/100 mL,  $\lambda = 589$  nm, in DCM), HPLC (Daicel Chiralpak OJH, *n*-hexane/*i*-PrOH 70/30, 1.0 mL/min,  $\lambda = 210$  nm,  $t_{R(\text{major})} = 8.61$  min,  $t_{R(\text{minor})} = 12.48$  min);

**$^1\text{H NMR}$**  (400 MHz, Chloroform-*d*):  $\delta$  8.32 (s, 1H), 7.45 – 7.29 (m, 5H), 5.63 – 5.49 (m, 1H), 5.29 – 5.15 (m, 1H), 4.34 (q,  $J = 7.1$  Hz, 2H), 2.81 (qdt,  $J = 14.3, 7.2, 1.2$  Hz, 2H), 1.66 – 1.54 (m, 3H), 1.35 (t,  $J = 7.1$  Hz, 3H);

**$^{13}\text{C}\{^1\text{H}\}$  NMR** (101 MHz, Chloroform-*d*):  $\delta$  166.73, 165.28, 160.15, 137.47, 132.17, 128.99, 128.63, 125.19, 124.58, 121.94, 88.27, 61.81, 42.93, 18.05, 14.15;

**IR** (film):  $\tilde{\nu}$  ( $\text{cm}^{-1}$ ) 3086, 2984, 2918, 1778, 1723, 1371, 1334, 1315, 1275, 1065, 1032, 800, 750, 700;

**ESI-HRMS** calcd for  $[\text{C}_{17}\text{H}_{18}\text{O}_4 + \text{Na}^+]$ : 309.1098, found 309.1092;

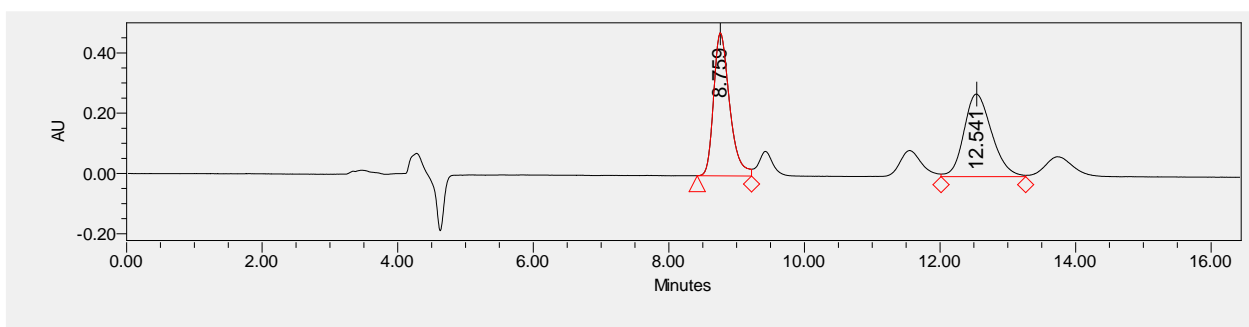

|   | Retention Time | Area    | % Area | Height |
|---|----------------|---------|--------|--------|
| 1 | 8.759          | 7758425 | 49.93  | 474693 |
| 2 | 12.541         | 7779952 | 50.07  | 273811 |

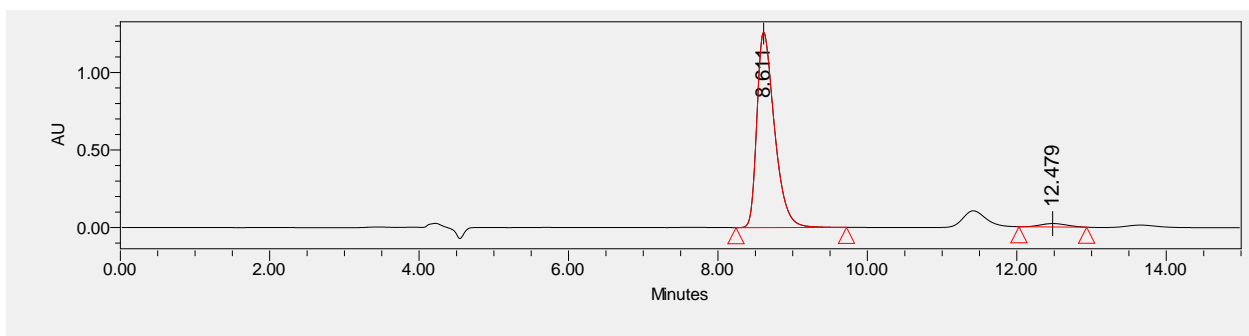

|   | Retention Time | Area     | % Area | Height  |
|---|----------------|----------|--------|---------|
| 1 | 8.611          | 20600220 | 97.48  | 1259664 |
| 2 | 12.479         | 533189   | 2.52   | 21878   |

**Ethyl (S,E)-5-(hex-2-en-1-yl)-2-oxo-5-phenyl-2,5-dihydrofuran-3-carboxylate (C32)**

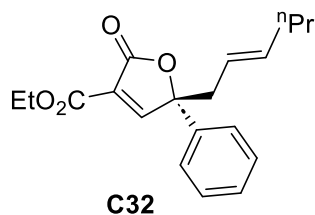

**Results:** colorless oil, 99% yield, 95% ee;  $[\alpha]_D^{24} = -60.8$  ( $c = 0.592$  g/100 mL,  $\lambda = 589$  nm, in DCM), HPLC (Daicel Chiralpak OJH, *n*-hexane/*i*-PrOH 75/25, 1.0 mL/min,  $\lambda = 210$  nm,  $t_{R(\text{major})} = 7.30$  min,  $t_{R(\text{minor})} = 9.40$  min);

**$^1\text{H}$  NMR** (400 MHz, Chloroform-*d*):  $\delta$  8.31 (s, 1H), 7.44 – 7.29 (m, 5H), 5.60 – 5.45 (m, 1H), 5.27 – 5.15 (m, 1H), 4.33 (q,  $J = 7.1$  Hz, 2H), 2.95 – 2.72 (m, 2H), 1.92 (q,  $J = 7.1$  Hz, 1H), 1.35 (t,  $J = 7.1$  Hz, 3H), 1.29 (q,  $J = 7.3$  Hz, 2H), 0.80 (t,  $J = 7.3$  Hz, 3H);

**$^{13}\text{C}\{^1\text{H}\}$  NMR** (101 MHz, Chloroform-*d*):  $\delta$  166.71, 165.29, 160.12, 137.60, 137.48, 128.97, 128.61, 125.19, 124.63, 120.99, 88.34, 61.78, 42.96, 34.55, 22.25, 14.15, 13.50;

**IR** (film):  $\tilde{\nu}$  ( $\text{cm}^{-1}$ ) 3086, 2959, 2928, 2871, 1779, 1723, 1370, 1334, 1314, 1260, 1066, 1032, 800, 763, 750, 700;

**ESI-HRMS** calcd for  $[\text{C}_{19}\text{H}_{22}\text{O}_4 + \text{Na}^+]$ : 337.1411, found 337.1405;

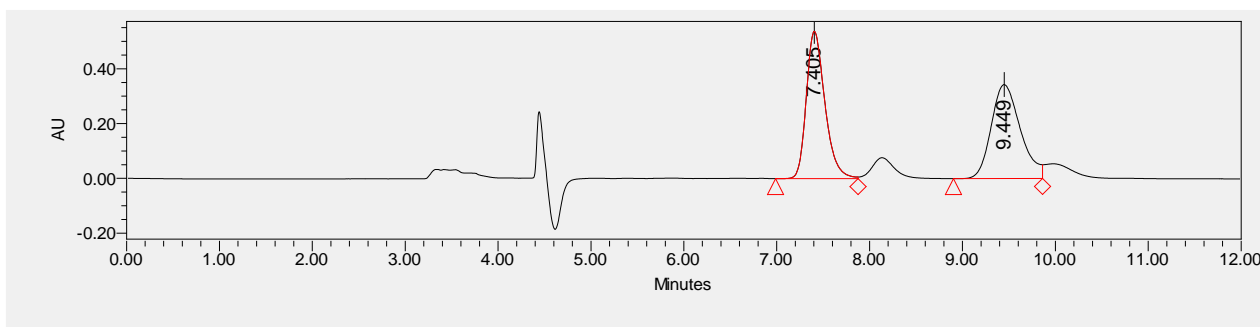

|   | Retention Time | Area    | % Area | Height |
|---|----------------|---------|--------|--------|
| 1 | 7.405          | 7481332 | 50.01  | 537743 |
| 2 | 9.449          | 7478458 | 49.99  | 342907 |

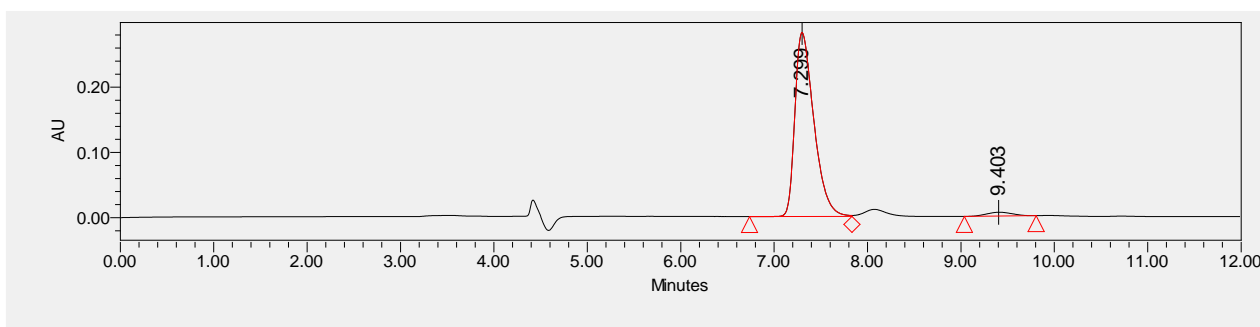

|   | Retention Time | Area    | % Area | Height |
|---|----------------|---------|--------|--------|
| 1 | 7.299          | 3979218 | 97.25  | 282076 |
| 2 | 9.403          | 112554  | 2.75   | 5920   |



## Ethyl (S)-5-cinnamyl-2-oxo-5-phenyl-2,5-dihydrofuran-3-carboxylate (C33)

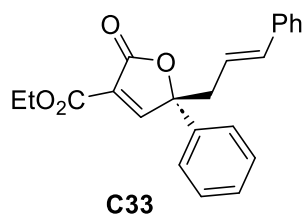

**Results:** white solid, 84% yield, 94% ee;  $[\alpha]_D^{24} = -52.6$  ( $c = 0.542$  g/100 mL,  $\lambda = 589$  nm, in DCM), HPLC (Daicel Chiralpak ADH, *n*-hexane/*i*-PrOH 70/30, 1.0 mL/min,  $\lambda = 210$  nm,  $t_{R(\text{minor})} = 7.74$  min,  $t_{R(\text{major})} = 8.57$  min);

**$^1\text{H}$  NMR** (400 MHz, Chloroform-*d*):  $\delta$  8.39 (s, 1H), 7.47 – 7.33 (m, 5H), 7.31 – 7.19 (m, 5H), 6.45 (d,  $J = 15.8$  Hz, 1H), 5.96 (dt,  $J = 15.7, 7.3$  Hz, 1H), 4.32 (q,  $J = 7.1$  Hz, 2H), 3.06 (ddd,  $J = 14.3, 7.4, 1.3$  Hz, 1H), 2.98 (ddd,  $J = 14.4, 7.2, 1.3$  Hz, 1H), 1.33 (t,  $J = 7.1$  Hz, 3H);

**$^{13}\text{C}\{^1\text{H}\}$  NMR** (101 MHz, Chloroform-*d*):  $\delta$  166.54, 165.05, 160.05, 137.21, 136.48, 135.81, 129.11, 128.80, 128.59, 127.84, 126.38, 125.23, 124.69, 120.86, 88.24, 61.88, 43.38, 14.13;

**IR** (film):  $\tilde{\nu}$  ( $\text{cm}^{-1}$ ) 3083, 3029, 2982, 2928, 1777, 1722, 1494, 1448, 1370, 1315, 1274, 1068, 1031, 800, 749, 700;

**ESI-HRMS** calcd for  $[\text{C}_{22}\text{H}_{20}\text{O}_4 + \text{Na}^+]$ : 371.1254, found 371.1247;

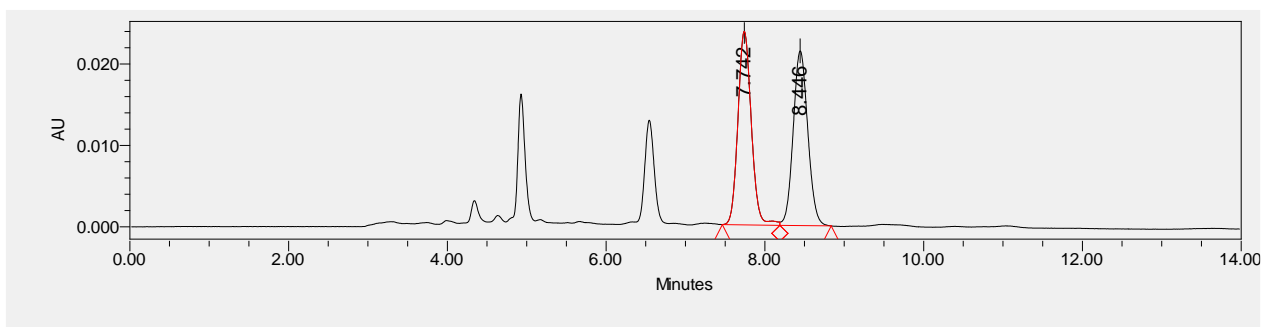

|   | Retention Time | Area   | % Area | Height |
|---|----------------|--------|--------|--------|
| 1 | 7.742          | 278824 | 50.47  | 23783  |
| 2 | 8.446          | 273676 | 49.53  | 21453  |

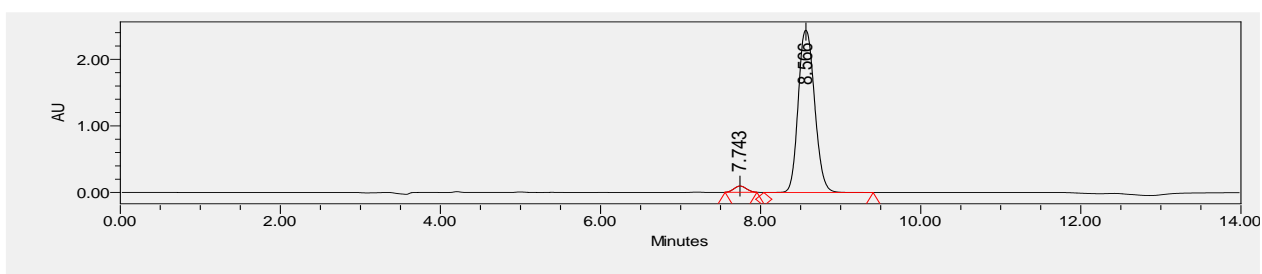

|   | Retention Time | Area     | % Area | Height  |
|---|----------------|----------|--------|---------|
| 1 | 7.743          | 1009841  | 2.83   | 94141   |
| 2 | 8.566          | 34687598 | 97.17  | 2437532 |

### (S)-5-Allyl-5-phenylfuran-2(5H)-one (D1)

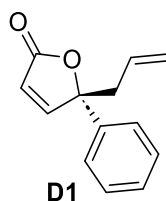

**Results:** colorless oil, 40% yield, 93% ee;  $[\alpha]_D^{24} = -128.5$  ( $c = 0.474$  g/100 mL,  $\lambda = 589$  nm, in DCM), UPC<sup>2</sup> (Daicel Chiralpak IG, CO<sub>2</sub>/MeOH 90/10, 1.5 mL/min,  $\lambda = 210$  nm,  $t_{R(\text{minor})} = 3.37$  min,  $t_{R(\text{major})} = 4.51$  min; <sup>1</sup>H NMR (400 MHz, Chloroform-*d*):  $\delta$  7.65 (d,  $J = 5.6$  Hz, 1H), 7.47 – 7.29 (m, 5H), 6.10 (d,  $J = 5.6$  Hz, 1H), 5.61 (ddt,  $J = 16.6, 10.7, 7.2$  Hz, 1H), 5.17 – 5.07 (m, 2H), 2.89 (ddt,  $J = 14.3, 7.2, 1.2$  Hz, 1H), 2.79 (ddt,  $J = 14.3, 7.0, 1.1$  Hz, 1H);

<sup>13</sup>C{<sup>1</sup>H} NMR (101 MHz, Chloroform-*d*):  $\delta$  172.08, 158.68, 138.58, 130.41, 128.83, 128.35, 125.12, 120.61, 120.47, 90.73, 44.05;

IR (film):  $\tilde{\nu}$  (cm<sup>-1</sup>) 3006, 2988, 1761, 1722, 1275, 1260, 1197, 930, 764, 750;

ESI-HRMS calcd for [C<sub>13</sub>H<sub>12</sub>O<sub>2</sub>+Na<sup>+</sup>]: 223.0730, found 223.0727;

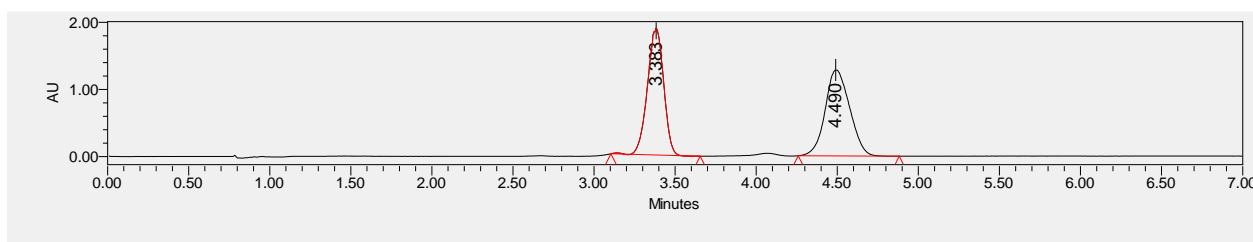

|   | Retention Time | Area     | % Area | Height  |
|---|----------------|----------|--------|---------|
| 1 | 3.383          | 13140011 | 49.45  | 1889894 |
| 2 | 4.490          | 13431946 | 50.55  | 1277987 |

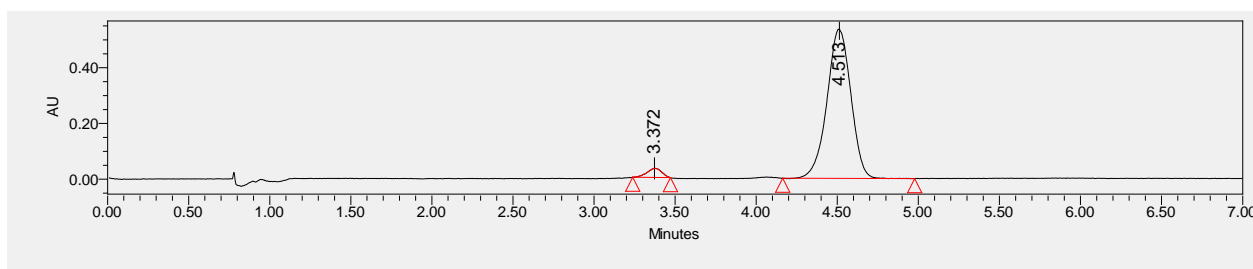

|   | Retention Time | Area    | % Area | Height |
|---|----------------|---------|--------|--------|
| 1 | 3.372          | 204929  | 3.60   | 32945  |
| 2 | 4.513          | 5479843 | 96.40  | 536495 |

## Ethyl (5S)-5-allyl-2-oxo-5-phenyltetrahydrofuran-3-carboxylate (E1)

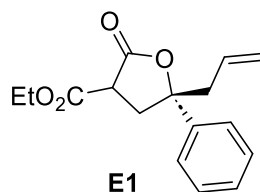

**Results:** colorless oil, 99% yield, 1.1/1 dr, 91/95% ee;  $[\alpha]_D^{24} = -17.5$  ( $c = 0.514$  g/100 mL,  $\lambda = 589$  nm, in DCM), UPC<sup>2</sup> (Daicel Chiralpak IG, CO<sub>2</sub>/MeOH 90/10, 1.5 mL/min,  $\lambda = 210$  nm,  $t_{R(\text{minor})} = 1.99$  min,  $t_{R(\text{minor})} = 2.93$  min  $t_{R(\text{major})} = 3.24$  min,  $t_{R(\text{major})} = 3.55$  min);

**<sup>1</sup>H NMR** (400 MHz, Chloroform-*d*): diastereomer mixture,  $\delta$  7.43 – 7.26 (m, 5H), 5.73 – 5.56 (m, 1H), 5.20 – 5.05 (m, 2H), 4.26 (qd,  $J = 7.2, 1.6$  Hz, 2H), 4.12 (q,  $J = 7.1$  Hz, 2H), 3.78 (t,  $J = 9.4$  Hz, 1H), 3.47 (dd,  $J = 11.4, 8.8$  Hz, 1H), 2.96 – 2.57 (m, 4H), 1.30 (t,  $J = 7.1$  Hz, 3H), 1.19 (t,  $J = 7.1$  Hz, 3H);

**<sup>13</sup>C{<sup>1</sup>H} NMR** (101 MHz, Chloroform-*d*): diastereomer mixture  $\delta$  171.26, 171.08, 167.62, 167.36, 142.90, 141.68, 131.17, 131.09, 128.70, 128.50, 128.07, 127.86, 124.73, 124.56, 120.80, 120.14, 87.52, 87.42, 62.24, 62.21, 47.41, 46.92, 46.63, 46.46, 37.63, 36.78, 14.09, 13.94;

**IR** (film):  $\tilde{\nu}$  (cm<sup>-1</sup>) 2983, 2928, 1777, 1734, 1275, 1260, 1177, 1019, 969, 764, 750, 702;

**ESI-HRMS** calcd for [C<sub>16</sub>H<sub>18</sub>O<sub>4</sub>+Na<sup>+</sup>]: 297.1098, found 297.1094;

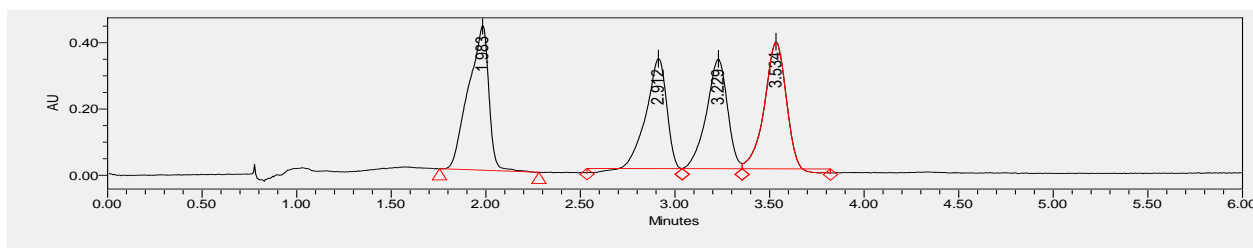

|   | Retention Time | Area    | % Area | Height |
|---|----------------|---------|--------|--------|
| 1 | 1.983          | 3255850 | 28.24  | 436069 |
| 2 | 2.912          | 2592223 | 22.49  | 331467 |
| 3 | 3.229          | 2557871 | 22.19  | 331512 |
| 4 | 3.534          | 3122627 | 27.09  | 383318 |

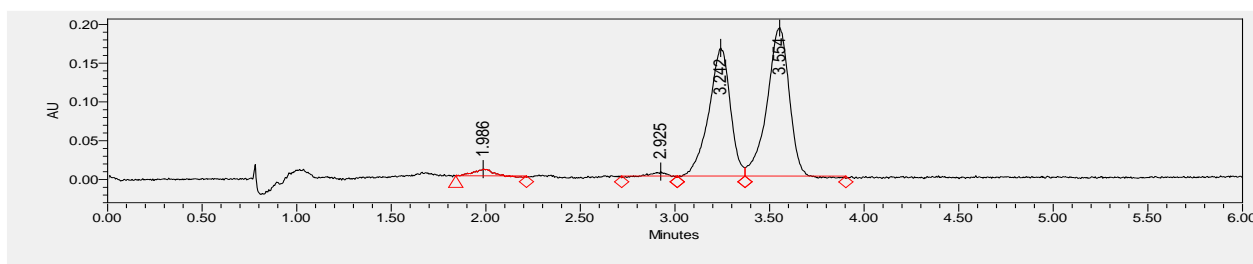

|   | Retention Time | Area    | % Area | Height |
|---|----------------|---------|--------|--------|
| 1 | 1.986          | 66986   | 2.26   | 8689   |
| 2 | 2.925          | 31899   | 1.08   | 5877   |
| 3 | 3.242          | 1302012 | 43.90  | 165046 |
| 4 | 3.554          | 1564683 | 52.76  | 191612 |

# (K) Copies of NMR spectra

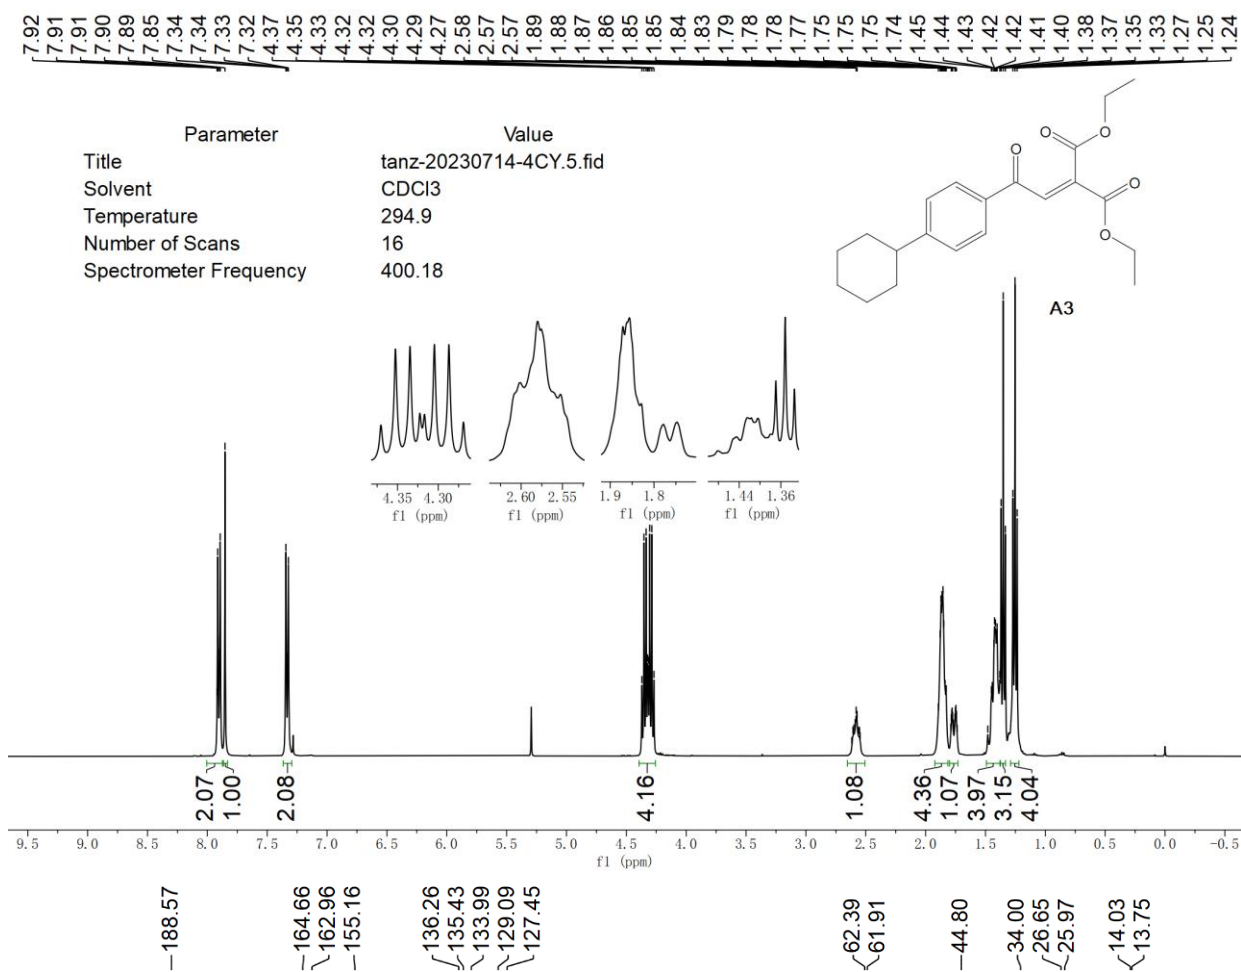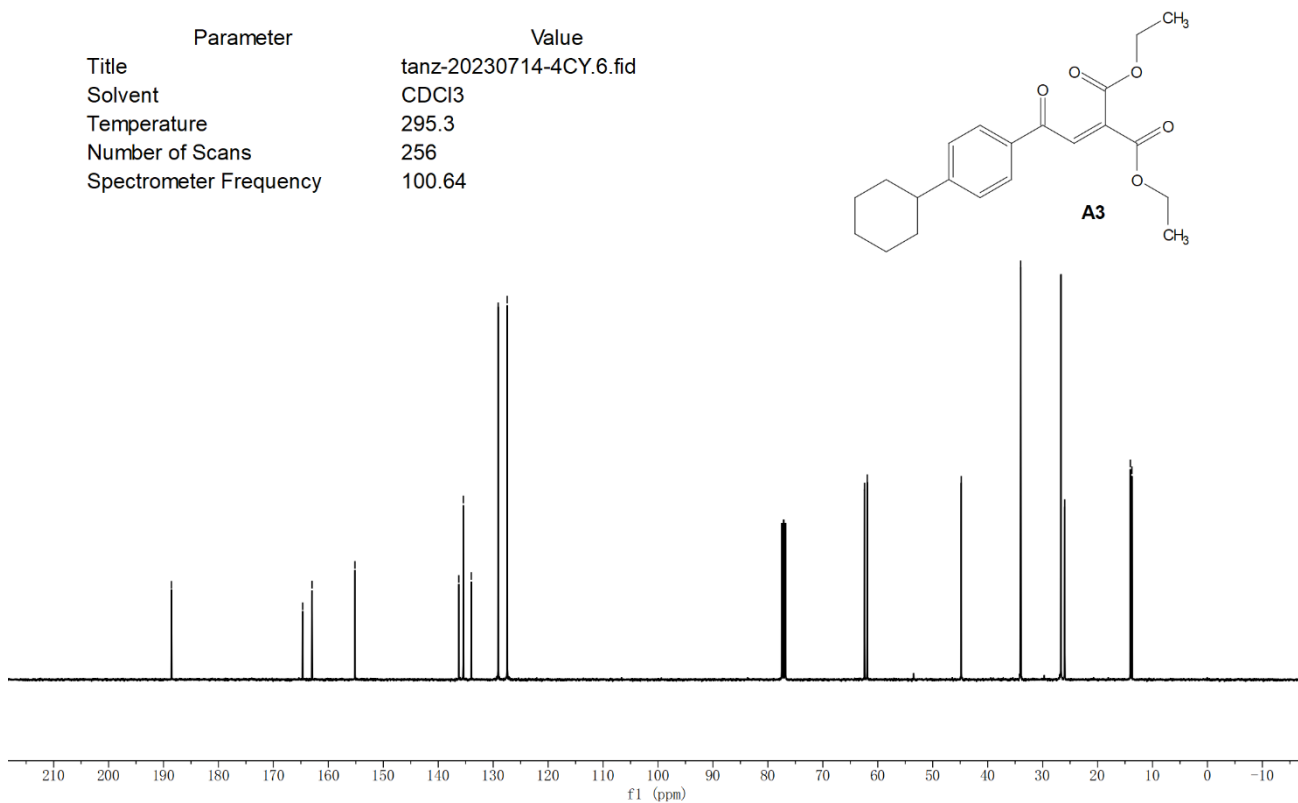

8.06  
8.04  
7.89  
7.73  
7.71  
7.64  
7.62  
7.48  
7.43  
7.41

-4.34

1.36  
1.28

| Parameter              | Value                   |
|------------------------|-------------------------|
| Title                  | tanz-20230619-4ph.1.fid |
| Solvent                | CDCl3                   |
| Temperature            | 294.7                   |
| Number of Scans        | 16                      |
| Spectrometer Frequency | 400.18                  |

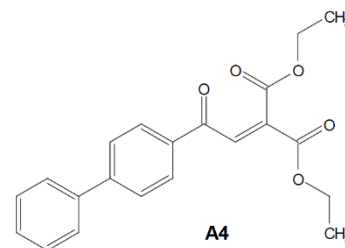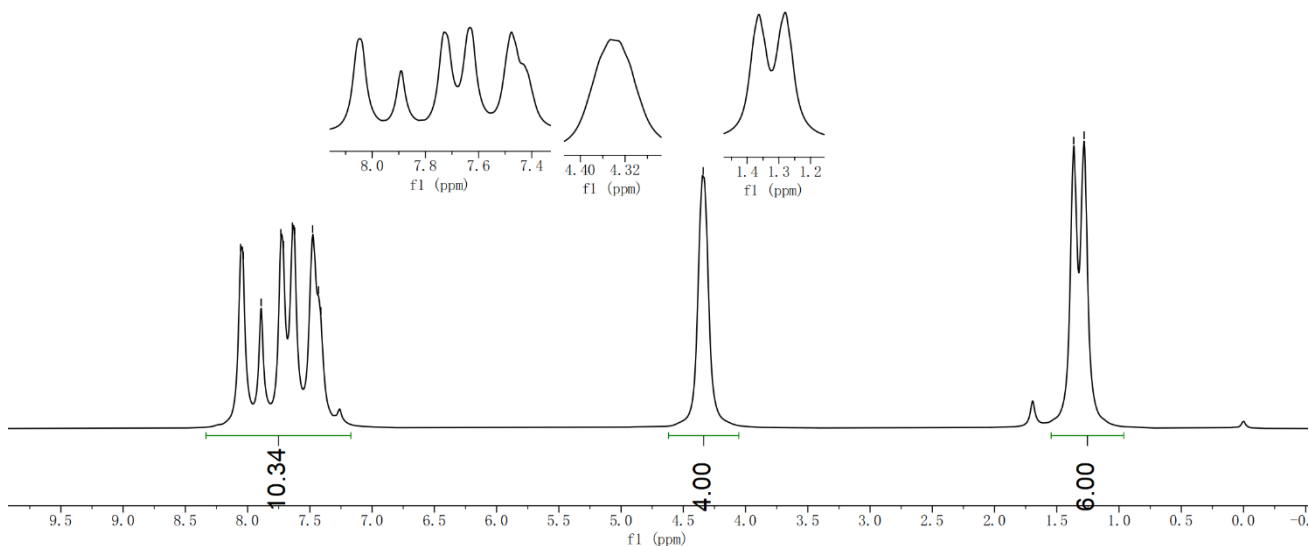

188.57  
164.64  
162.94  
146.91  
139.52  
136.55  
135.23  
134.81  
129.48  
129.06  
128.59  
127.56  
127.34

62.50  
62.03

14.07  
13.81

| Parameter              | Value                   |
|------------------------|-------------------------|
| Title                  | tanz-20230619-4ph.2.fid |
| Solvent                | CDCl3                   |
| Temperature            | 295.3                   |
| Number of Scans        | 256                     |
| Spectrometer Frequency | 100.64                  |

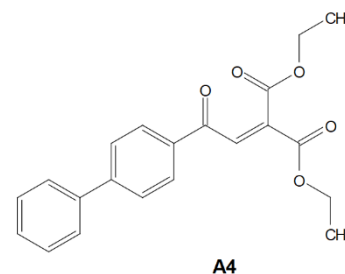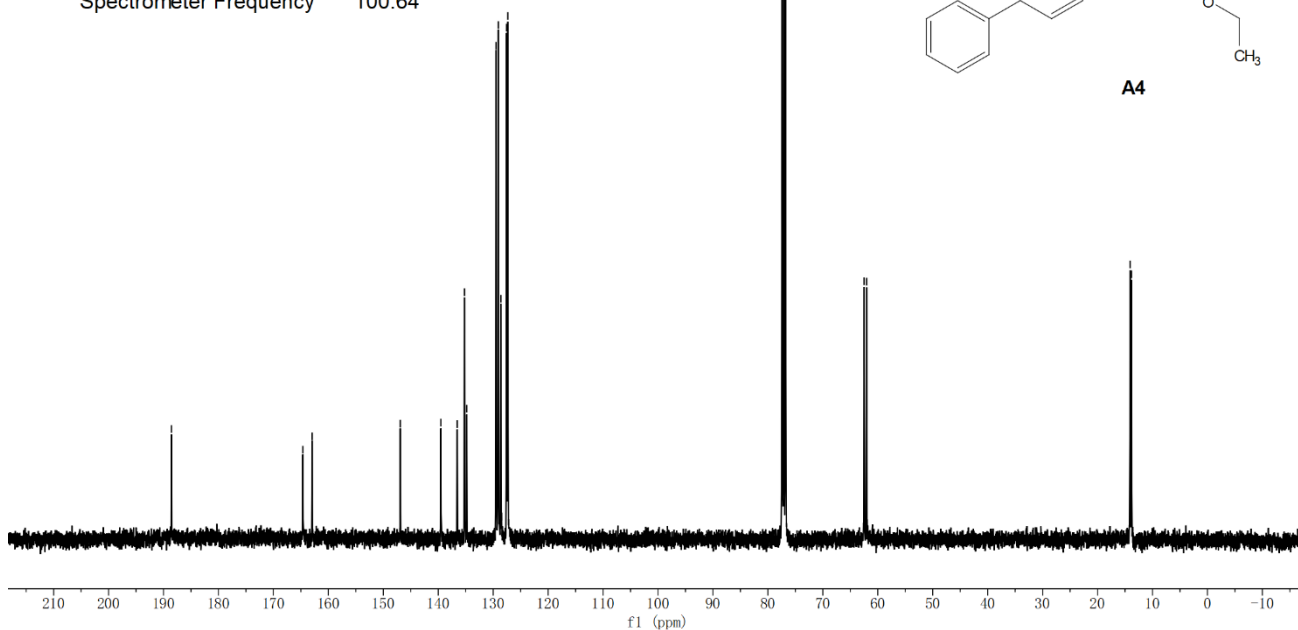

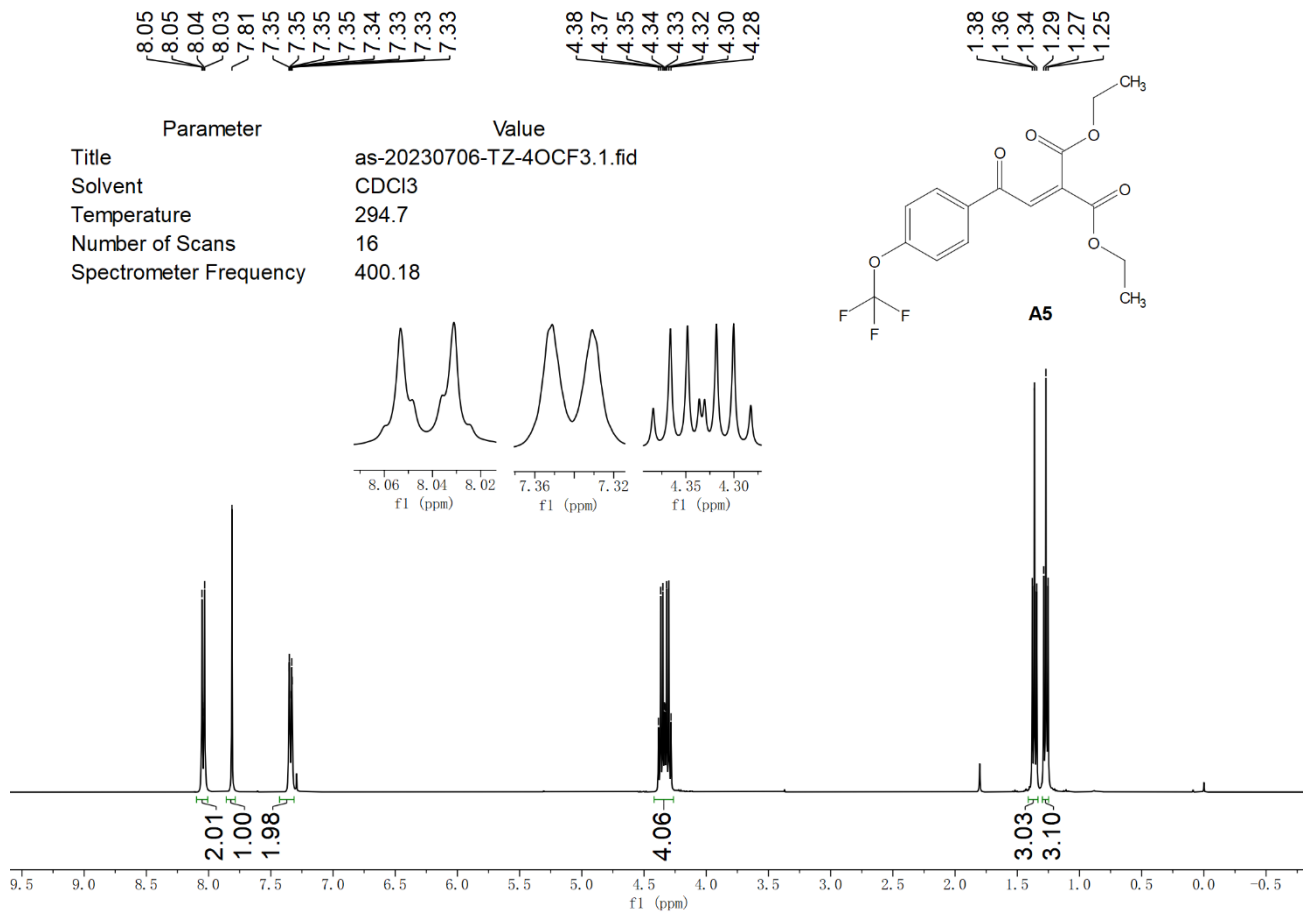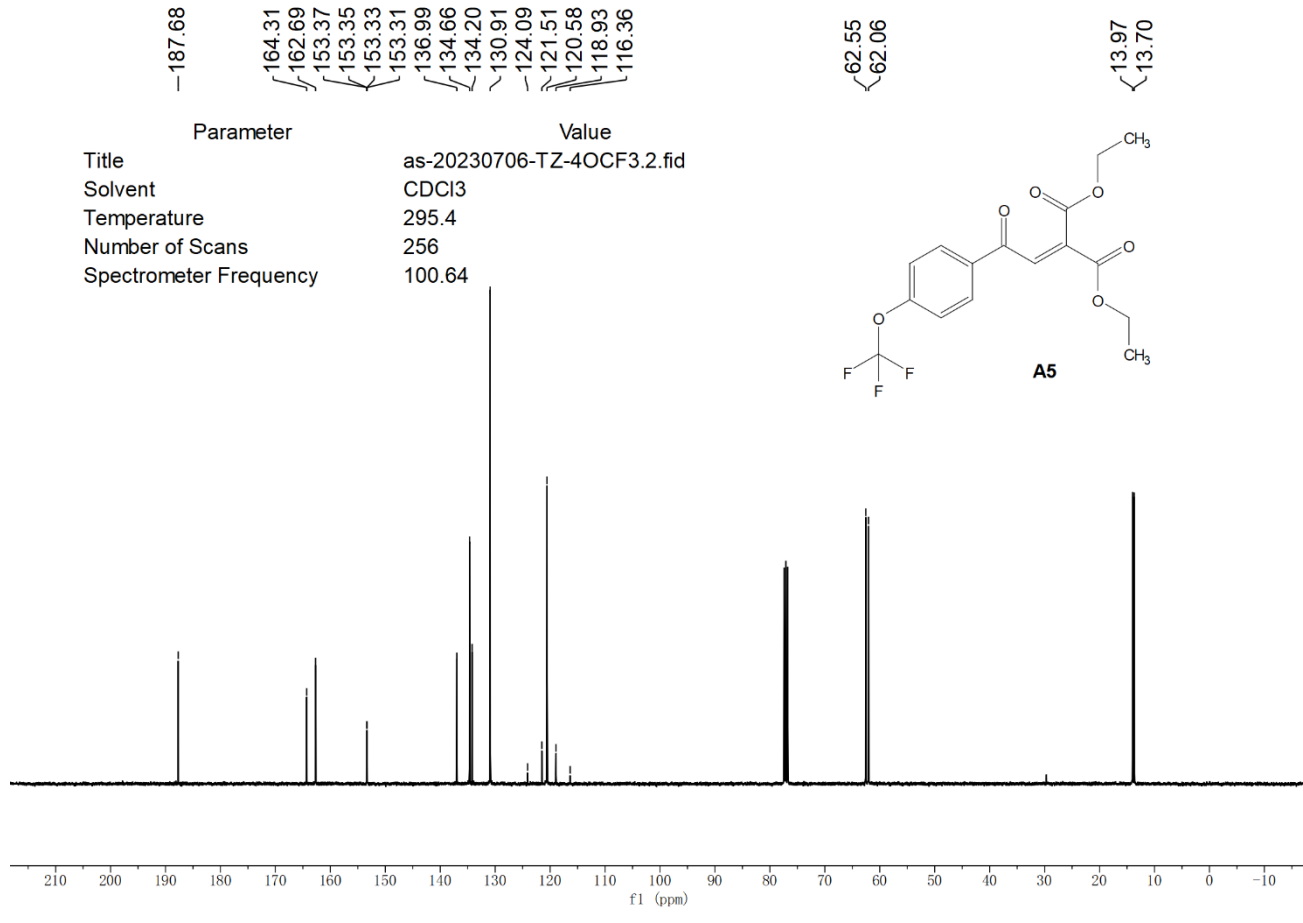

| Parameter              | Value                      |
|------------------------|----------------------------|
| Title                  | as-20230706-TZ-4OCF3.3.fid |
| Solvent                | CDCl3                      |
| Temperature            | 295.1                      |
| Number of Scans        | 16                         |
| Spectrometer Frequency | 376.51                     |

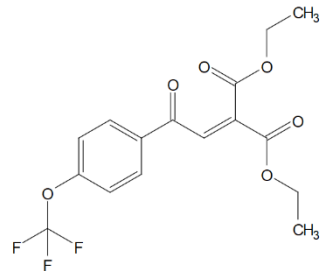

**A5**

--57.65

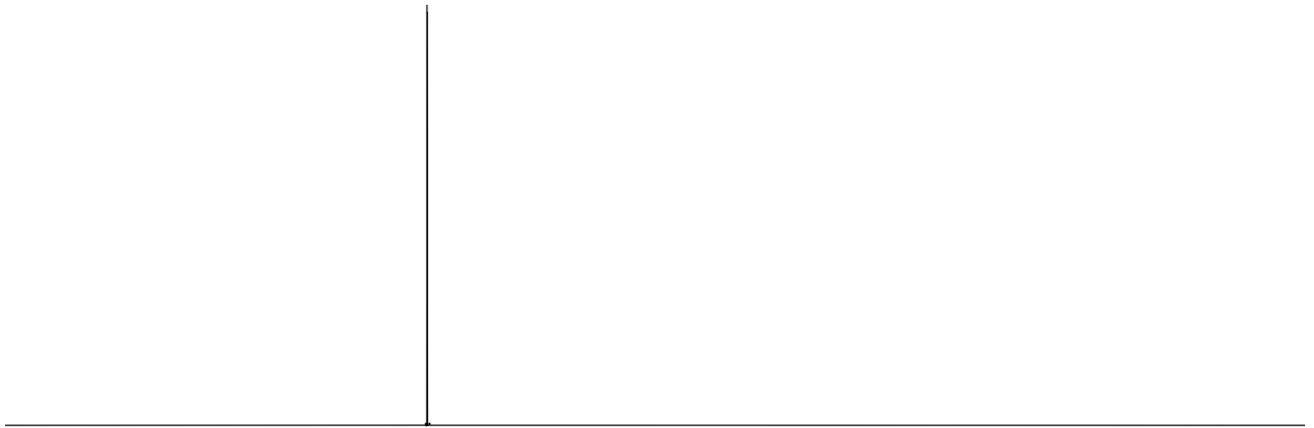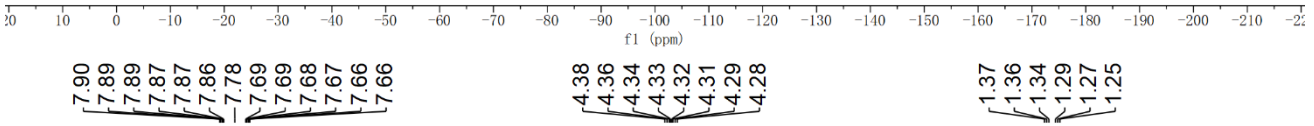

| Parameter              | Value                  |
|------------------------|------------------------|
| Title                  | tanz-20230616-4l.1.fid |
| Solvent                | CDCl3                  |
| Temperature            | 294.5                  |
| Number of Scans        | 16                     |
| Spectrometer Frequency | 400.18                 |

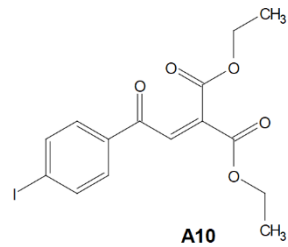

**A10**

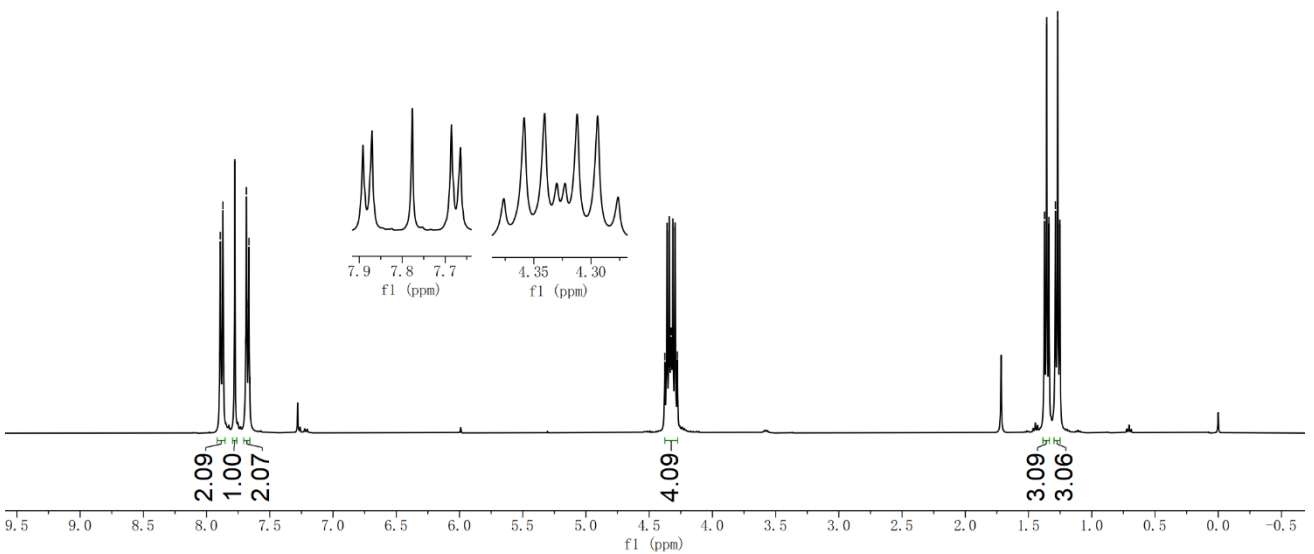

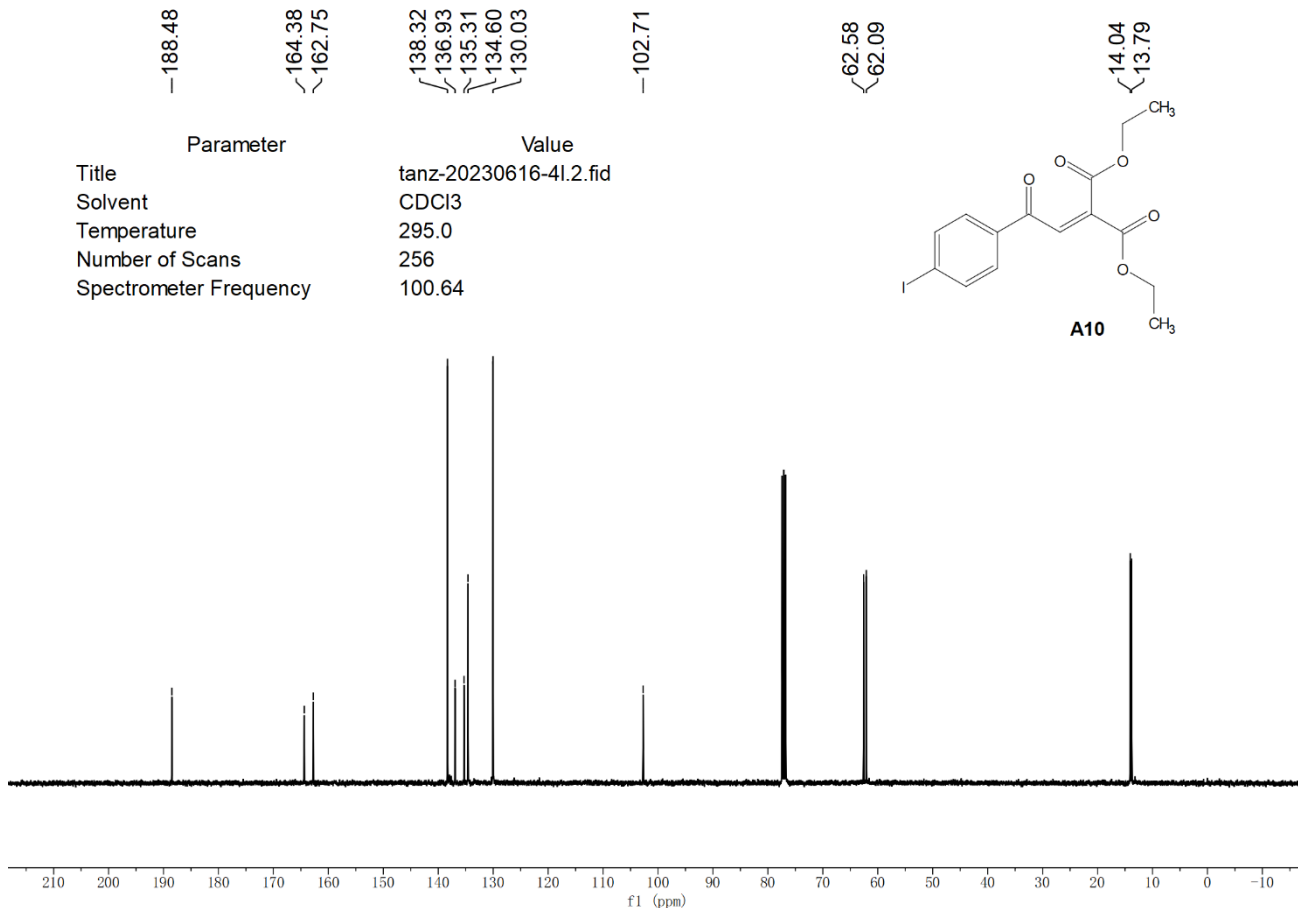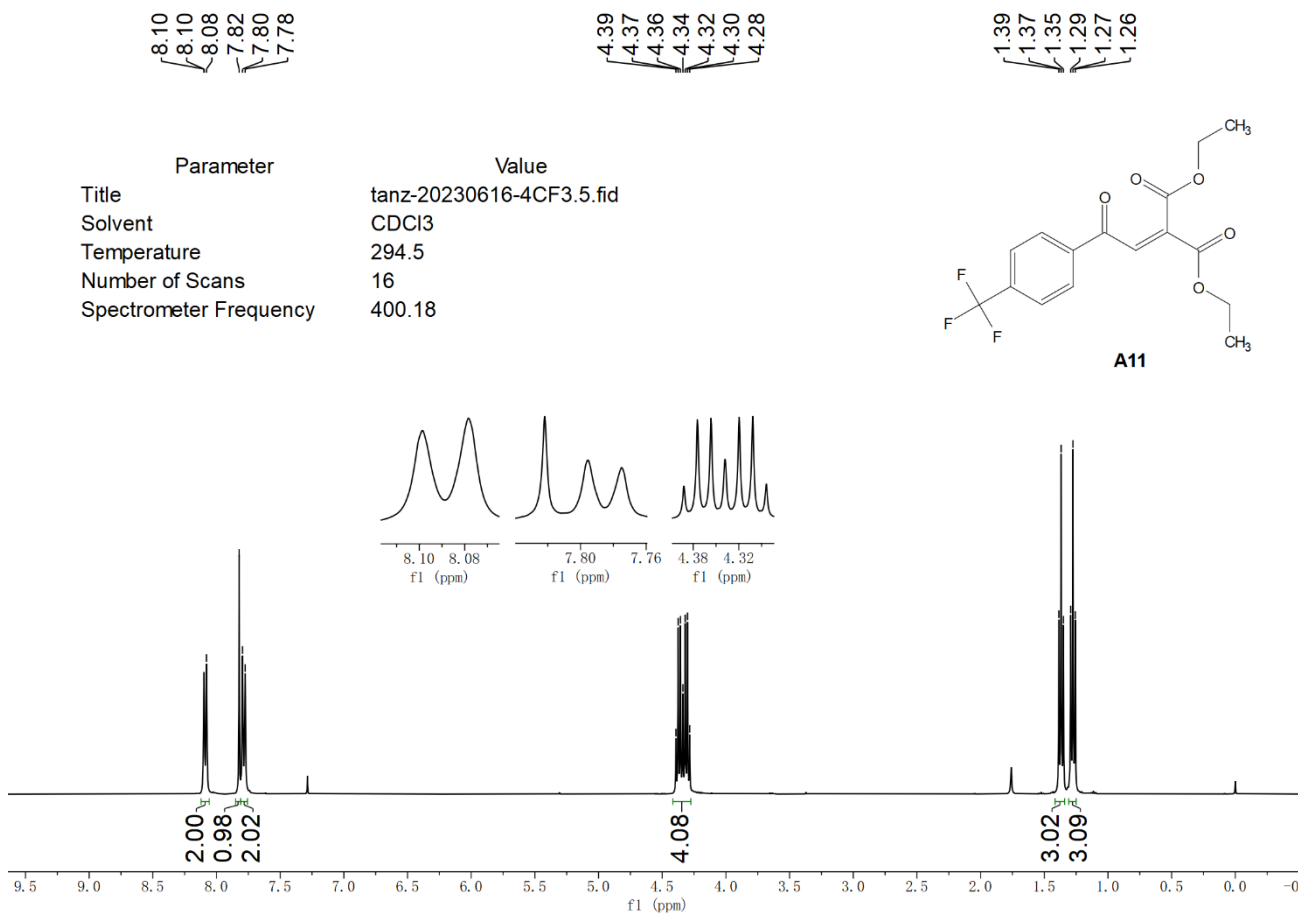



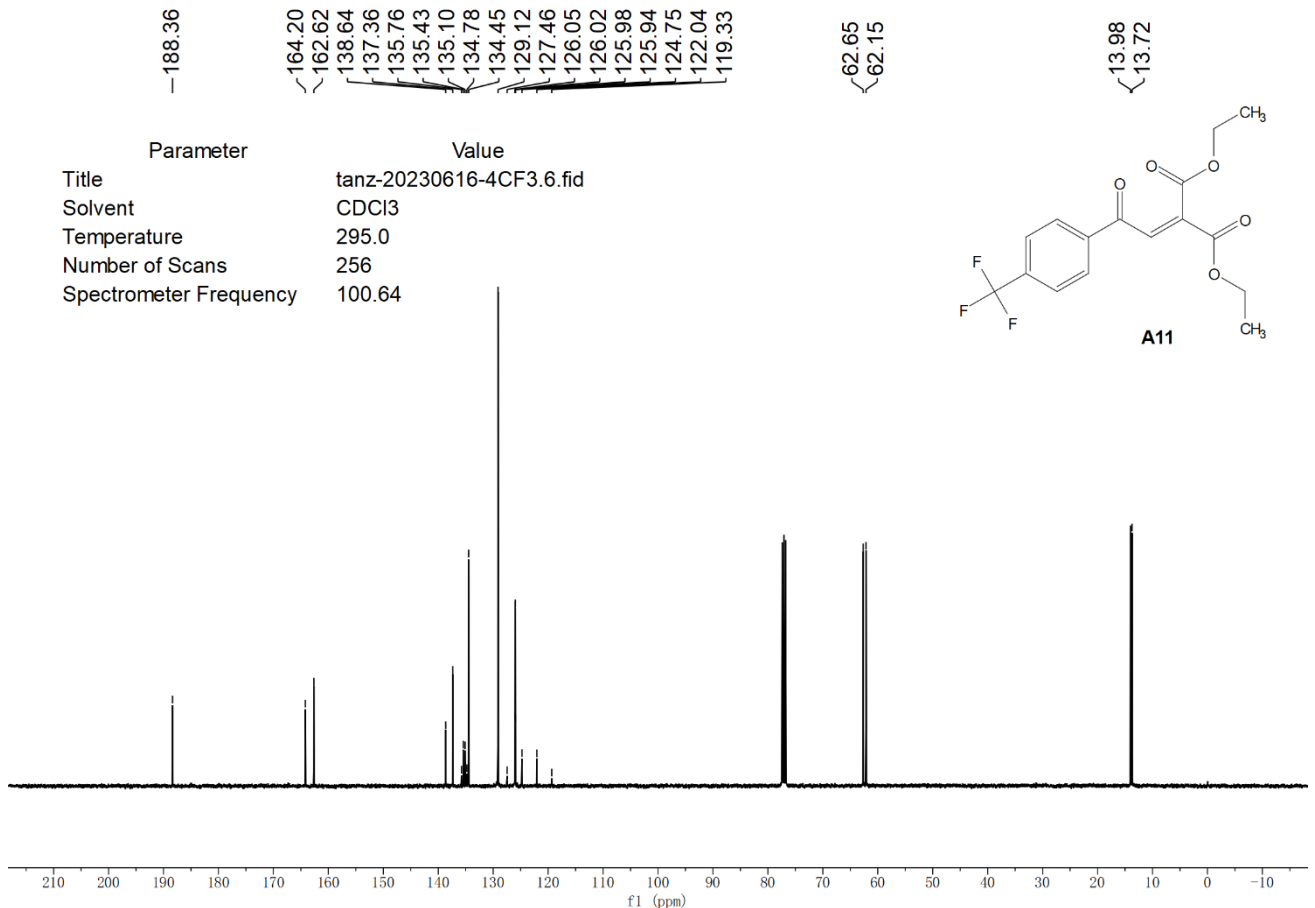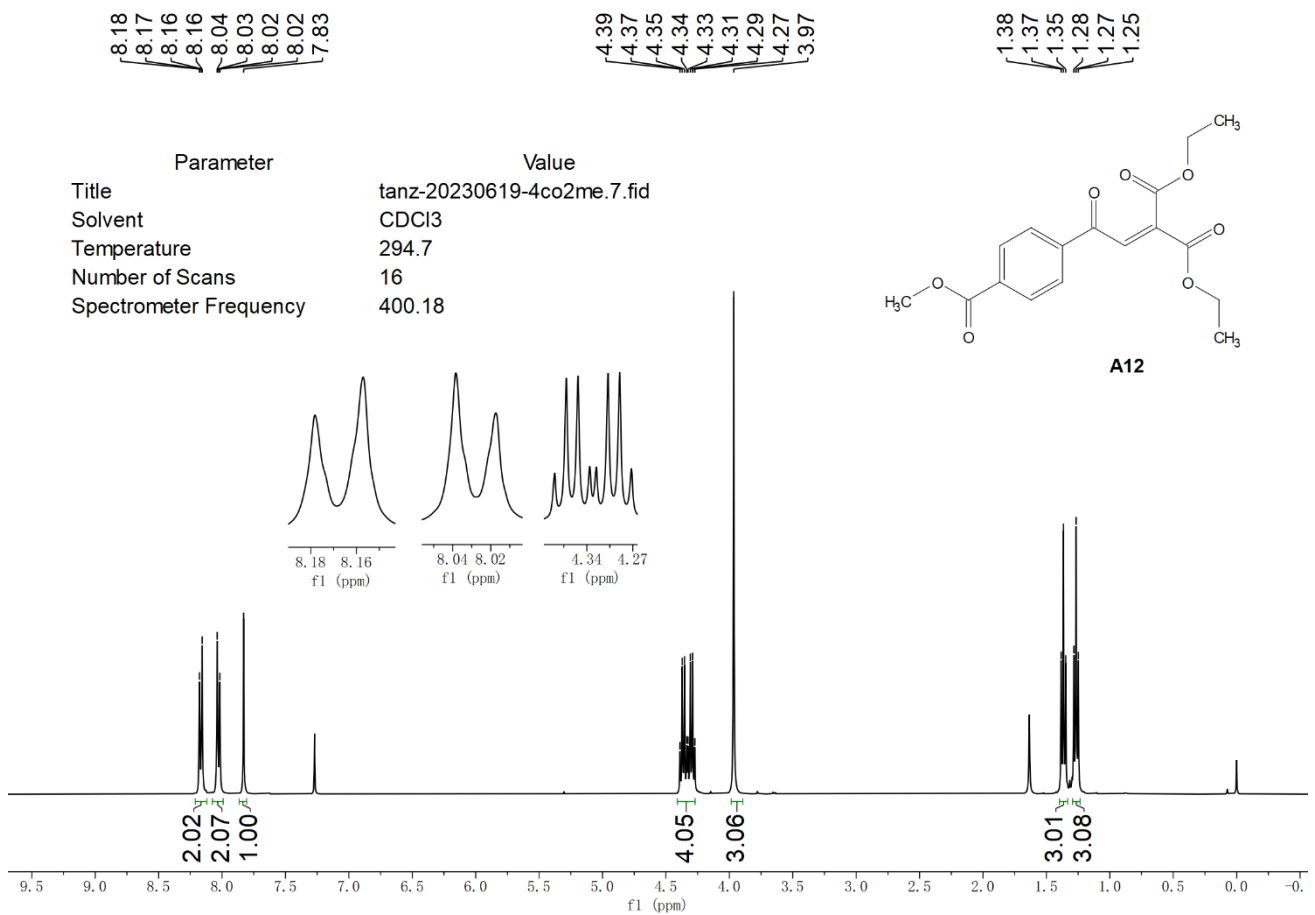

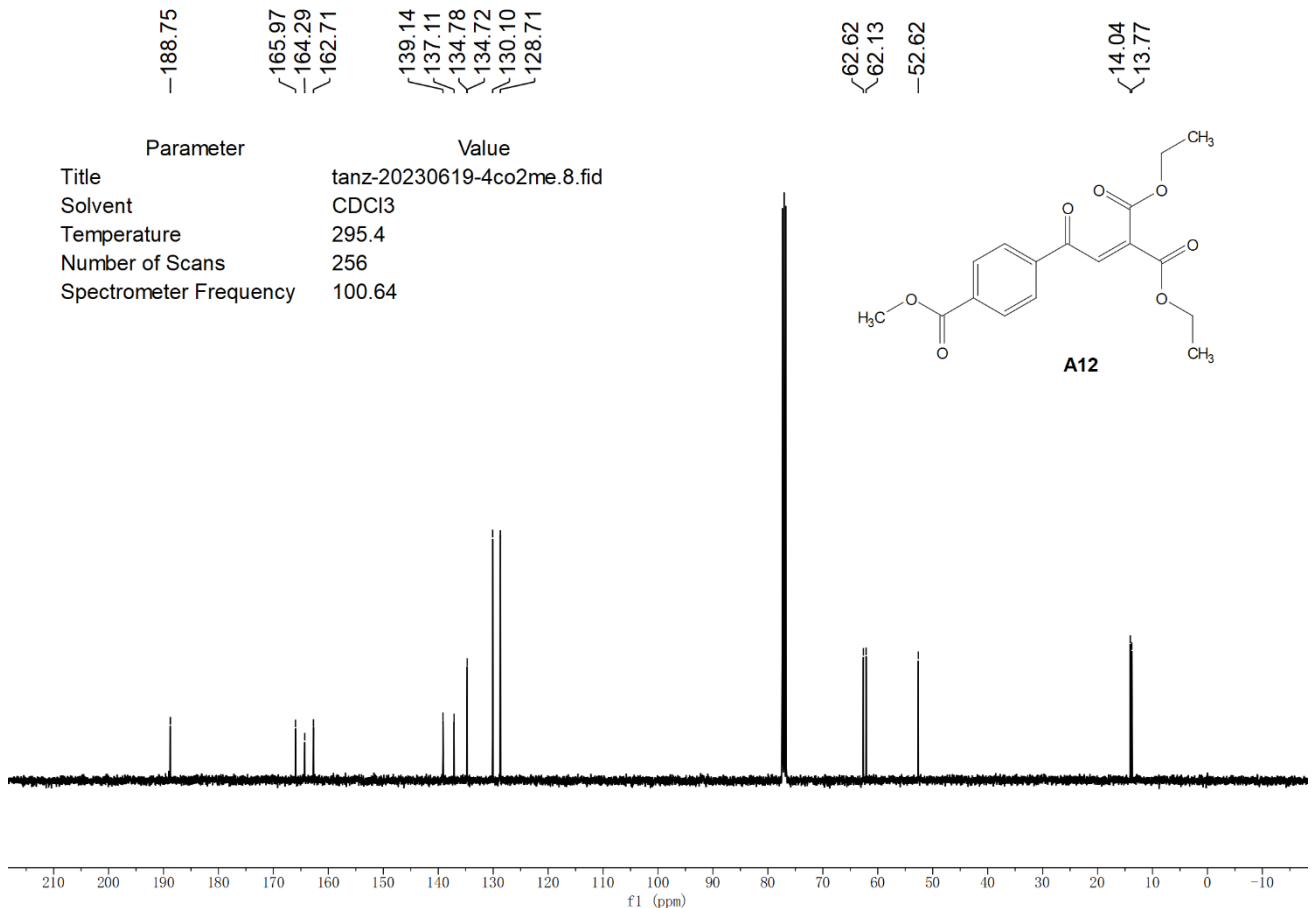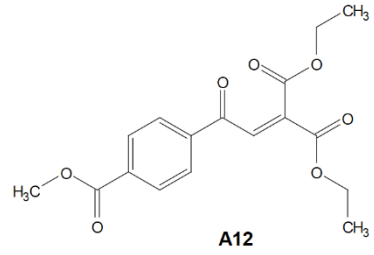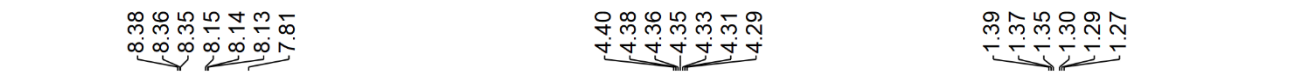

| Parameter              | Value                    |
|------------------------|--------------------------|
| Title                  | tanz-20230714-4NO2.1.fid |
| Solvent                | CDCl3                    |
| Temperature            | 294.6                    |
| Number of Scans        | 16                       |
| Spectrometer Frequency | 400.18                   |

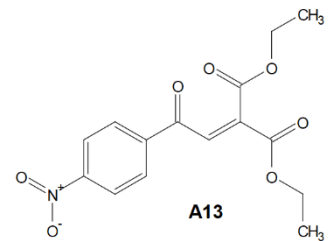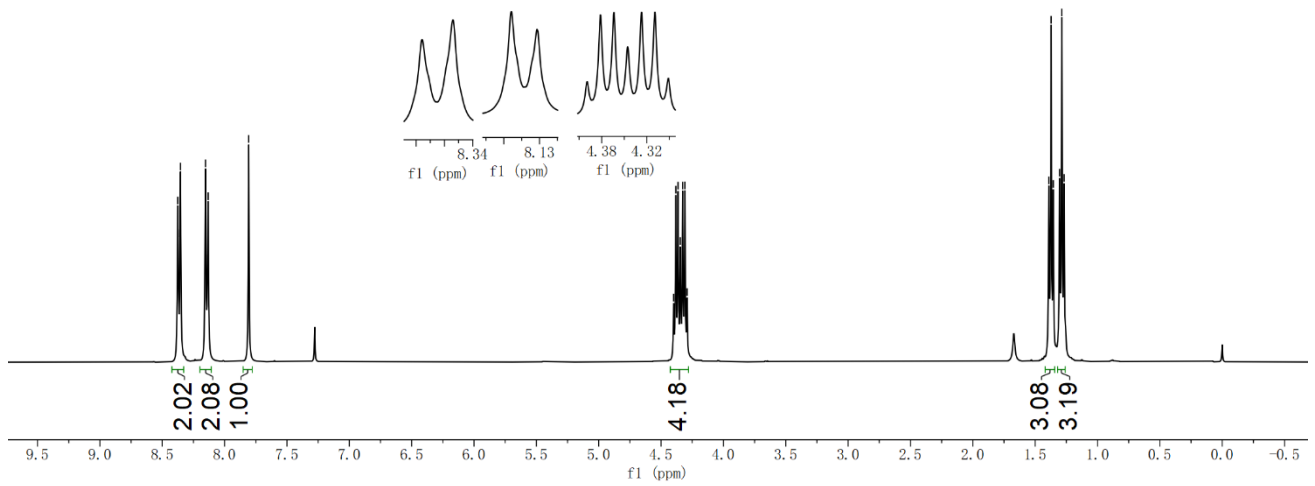

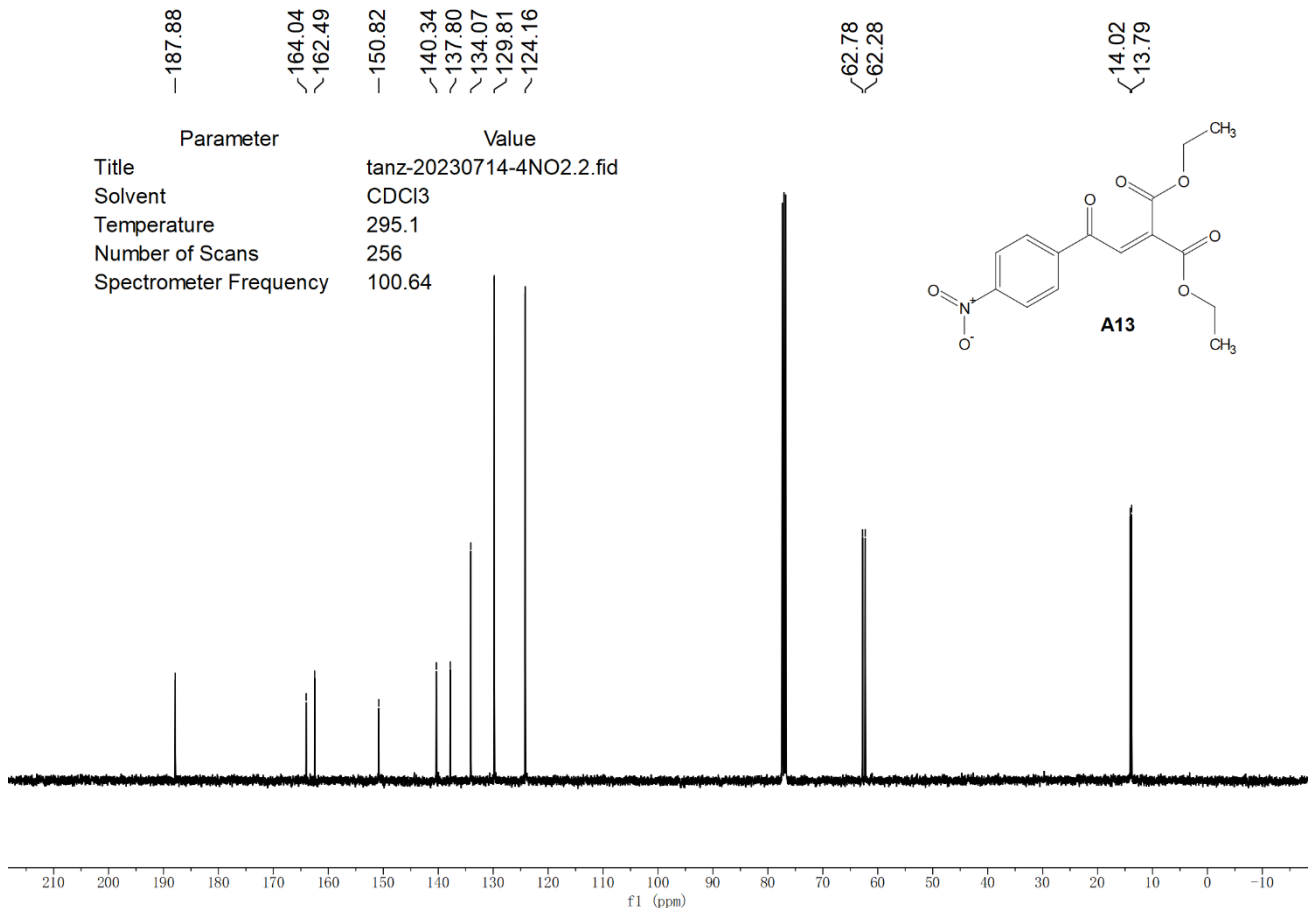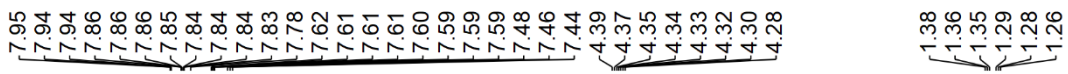

| Parameter              | Value                   |
|------------------------|-------------------------|
| Title                  | tanz-20230719-3CL.9.fid |
| Solvent                | CDCl3                   |
| Temperature            | 294.2                   |
| Number of Scans        | 16                      |
| Spectrometer Frequency | 400.18                  |

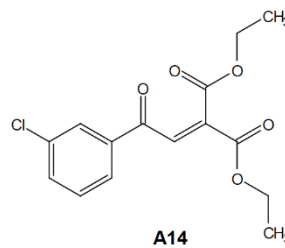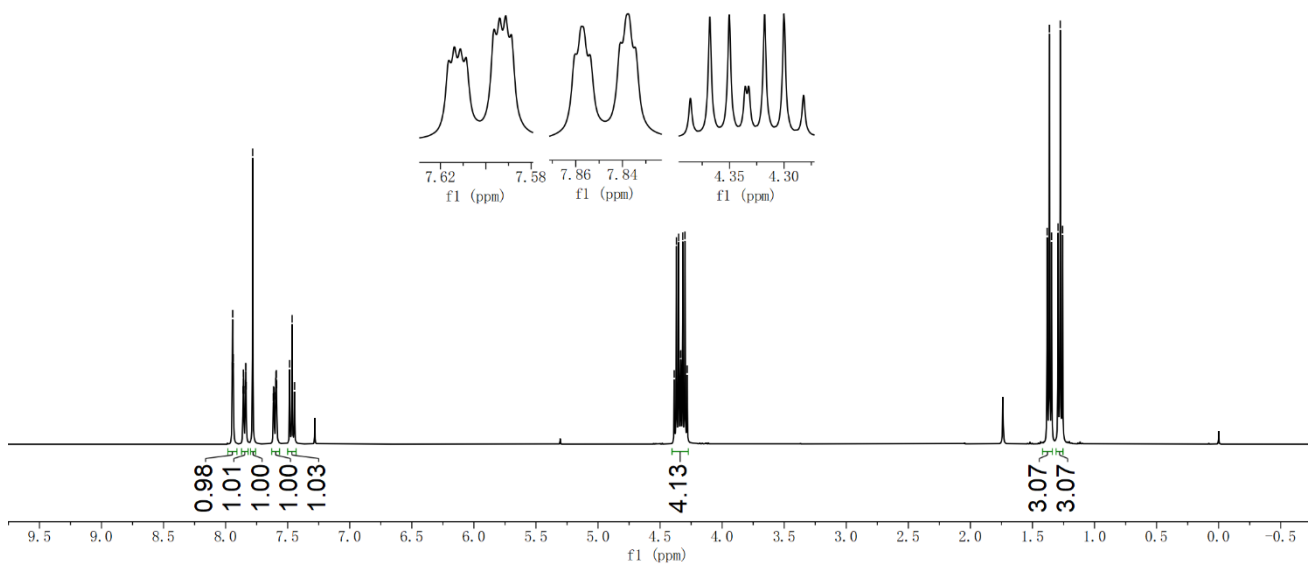

|                        |                          |        |        |        |        |        |        |        |        |        |        |
|------------------------|--------------------------|--------|--------|--------|--------|--------|--------|--------|--------|--------|--------|
|                        | 187.98                   | 164.29 | 162.69 | 137.52 | 137.14 | 135.36 | 134.56 | 134.13 | 130.31 | 128.73 | 126.92 |
| Parameter              |                          |        |        |        |        |        |        |        |        |        |        |
| Title                  | tanz-20230719-3CL.10.fid |        |        |        |        |        |        |        |        |        |        |
| Solvent                | CDCl <sub>3</sub>        |        |        |        |        |        |        |        |        |        |        |
| Temperature            | 294.7                    |        |        |        |        |        |        |        |        |        |        |
| Number of Scans        | 256                      |        |        |        |        |        |        |        |        |        |        |
| Spectrometer Frequency | 100.64                   |        |        |        |        |        |        |        |        |        |        |

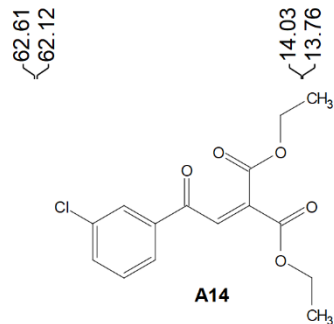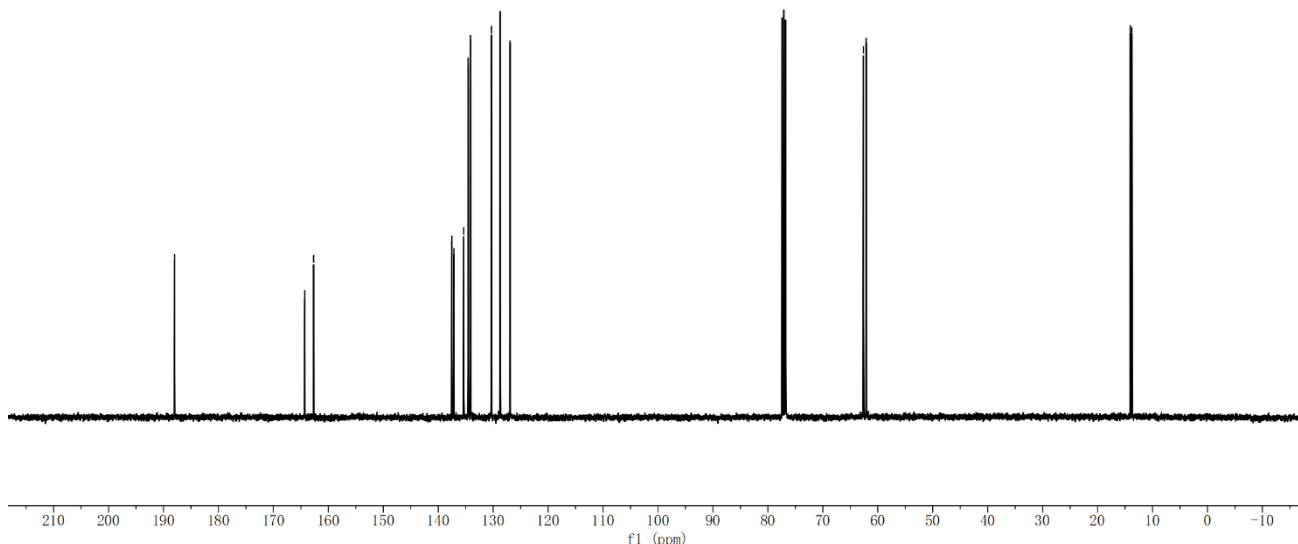

8.80  
8.80  
8.79  
8.51  
8.51  
8.50  
8.50  
8.49  
8.49  
8.48  
8.48  
8.32  
8.32  
8.31  
8.30  
8.30  
8.29  
8.29  
7.83  
7.78  
7.76  
7.74

4.41  
4.39  
4.37  
4.36  
4.36  
4.34  
4.32  
4.30

1.40  
1.38  
1.36  
1.31  
1.29  
1.28

|                        |                           |
|------------------------|---------------------------|
| Parameter              | Value                     |
| Title                  | tanz-20230719-3NO2.13.fid |
| Solvent                | CDCl <sub>3</sub>         |
| Temperature            | 294.0                     |
| Number of Scans        | 16                        |
| Spectrometer Frequency | 400.18                    |

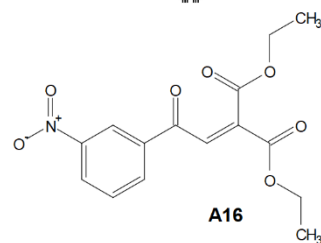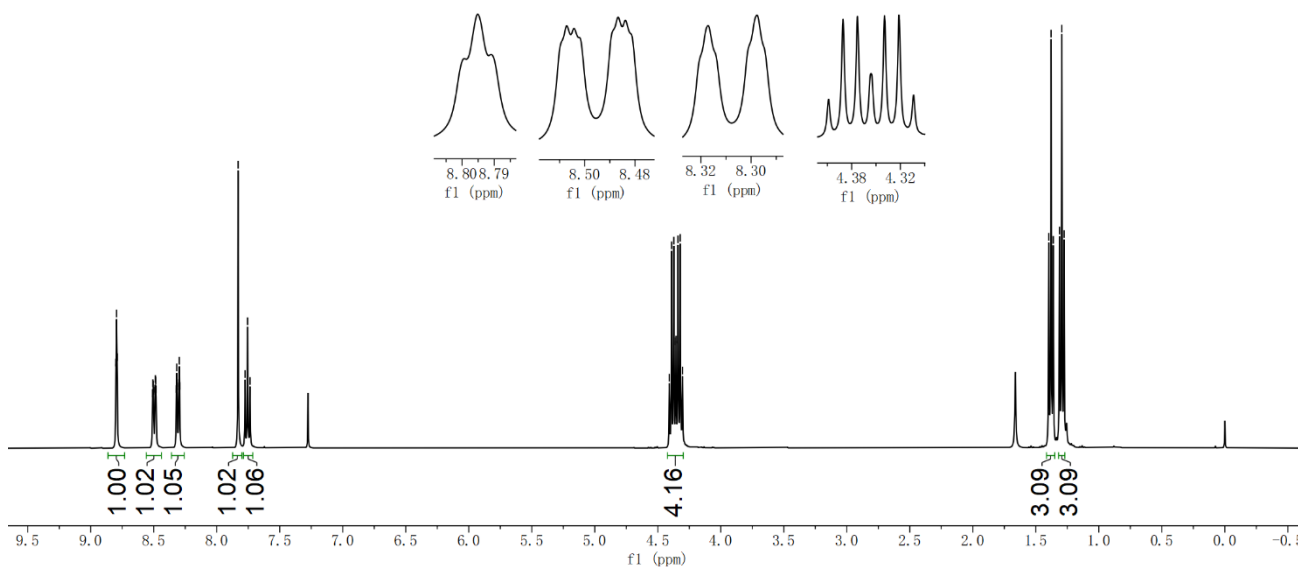

1.00  
1.02  
1.05  
1.02  
1.06

4.16

3.09  
3.09

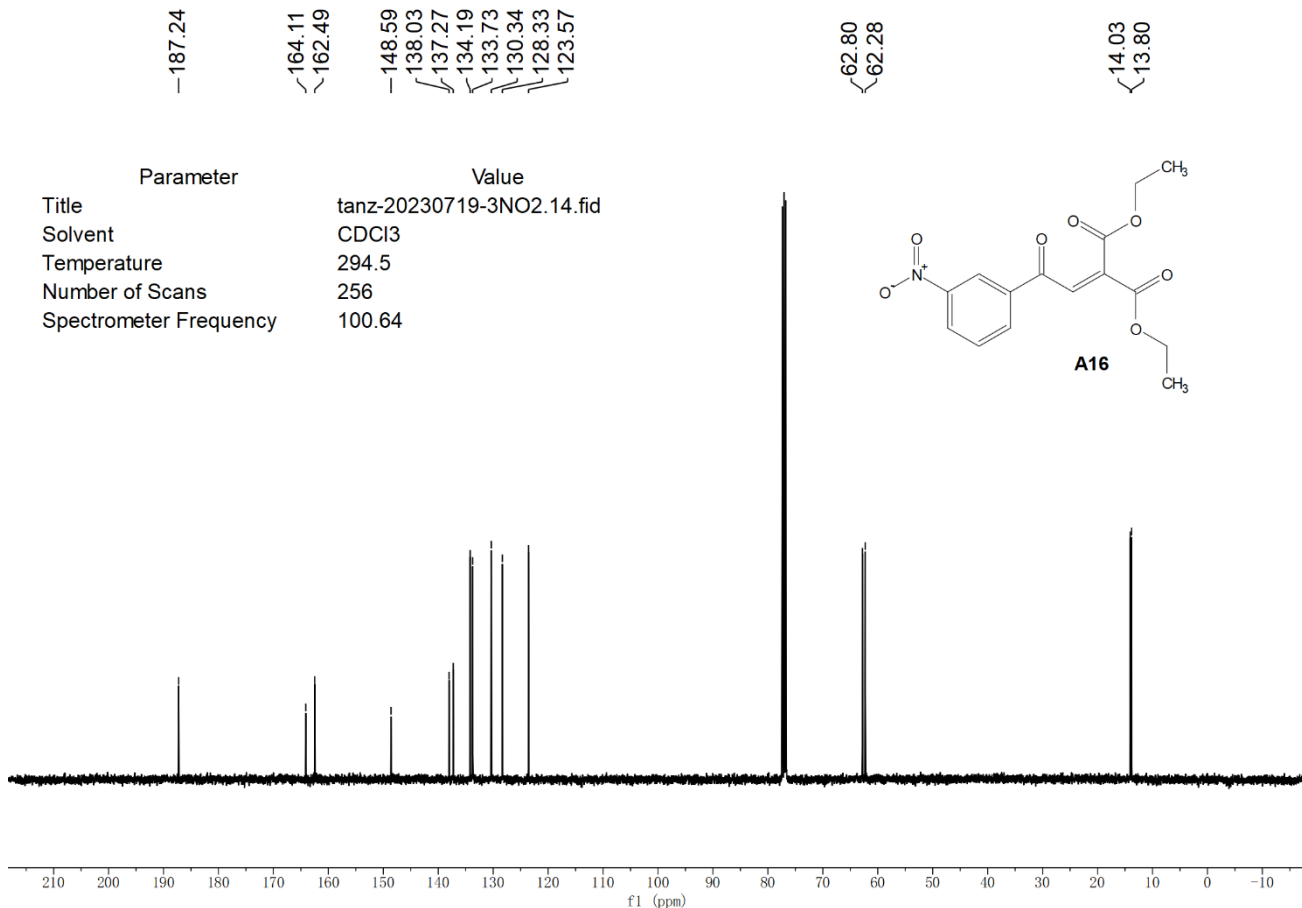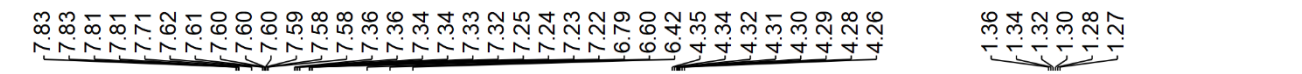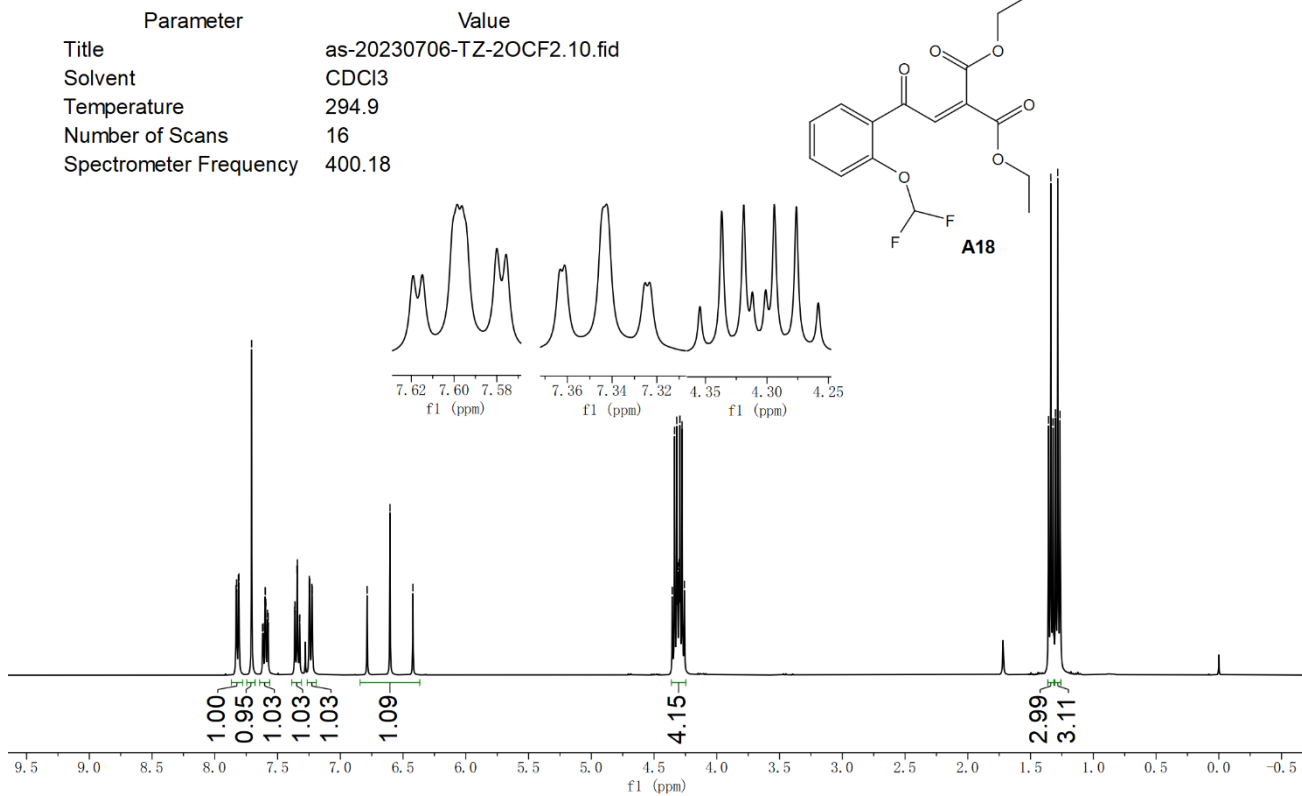

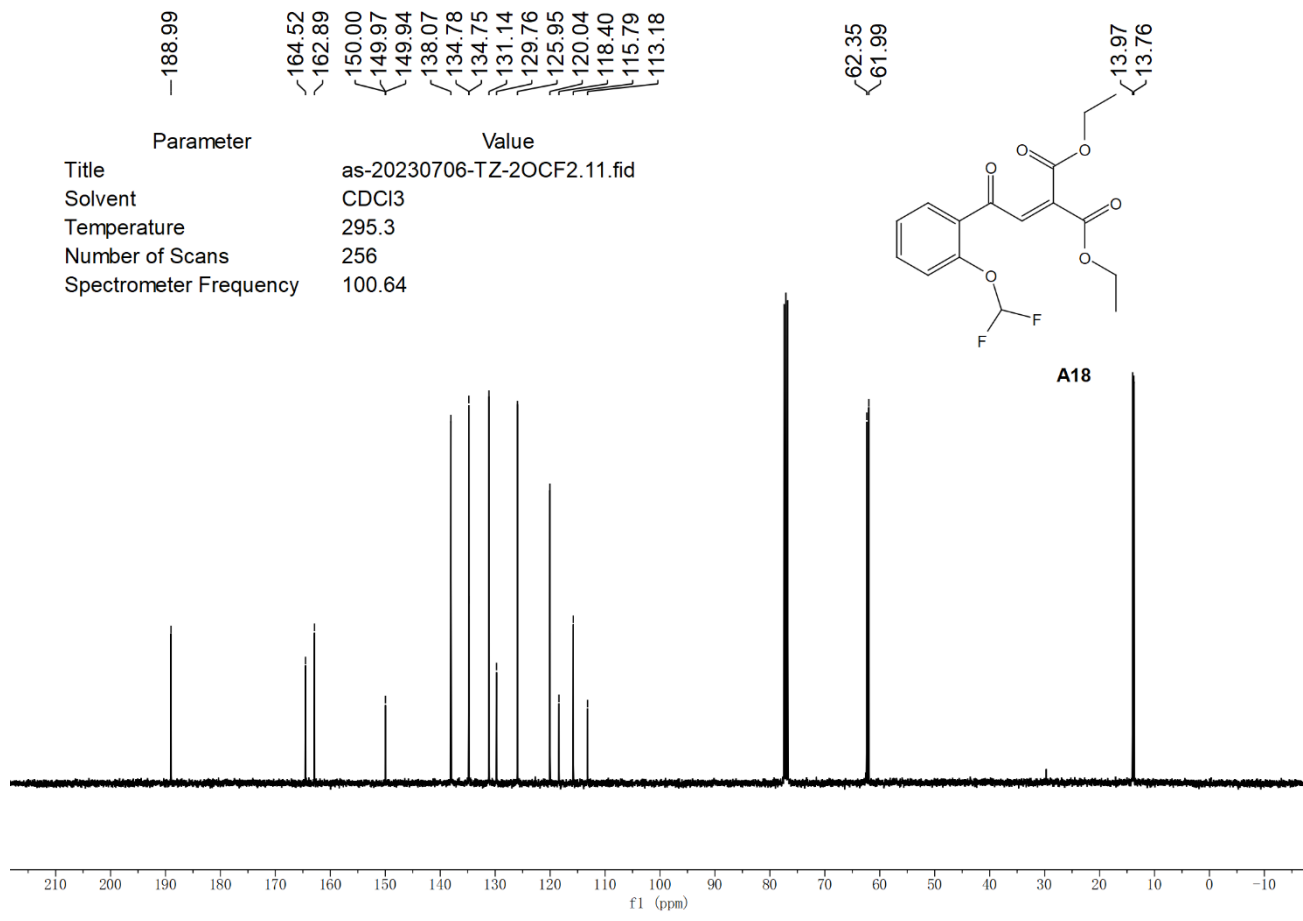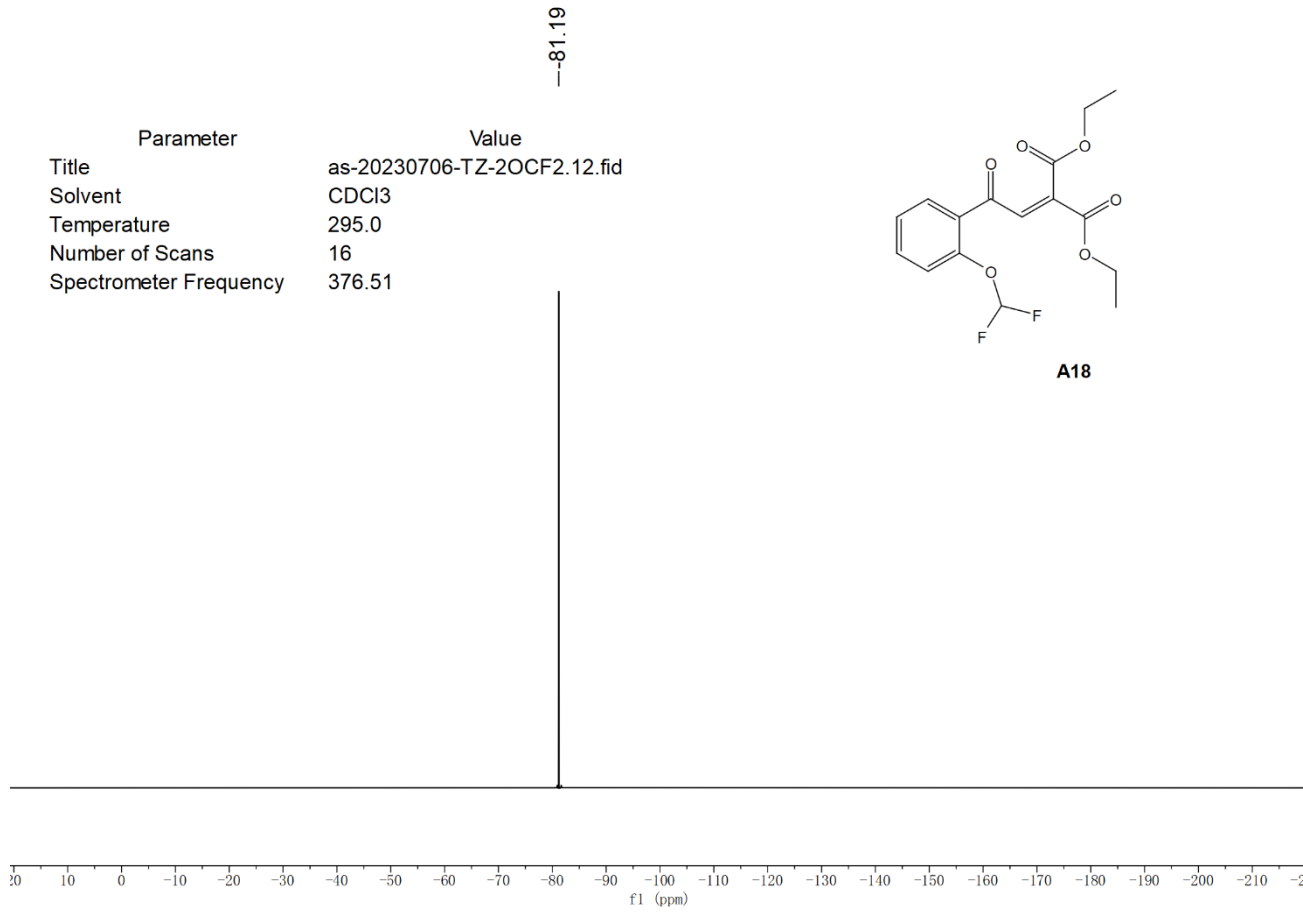

7.89  
7.88  
7.87  
7.86  
7.85  
7.77  
7.76  
7.63  
7.62  
7.61  
7.61  
7.60  
7.60  
7.59  
7.59  
7.58  
7.58  
7.57  
7.30  
7.28  
7.28  
7.26  
7.26  
7.21  
7.20  
7.18  
7.18  
7.17  
7.16  
7.15  
4.37  
4.35  
4.35  
4.33  
4.33  
4.32  
4.31  
1.37  
1.36  
1.35  
1.33  
1.31  
1.29

| Parameter              | Value                   |
|------------------------|-------------------------|
| Title                  | as-20230706-TZ-2F.7.fid |
| Solvent                | CDCl <sub>3</sub>       |
| Temperature            | 294.8                   |
| Number of Scans        | 16                      |
| Spectrometer Frequency | 400.18                  |

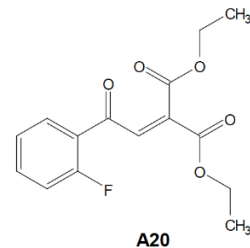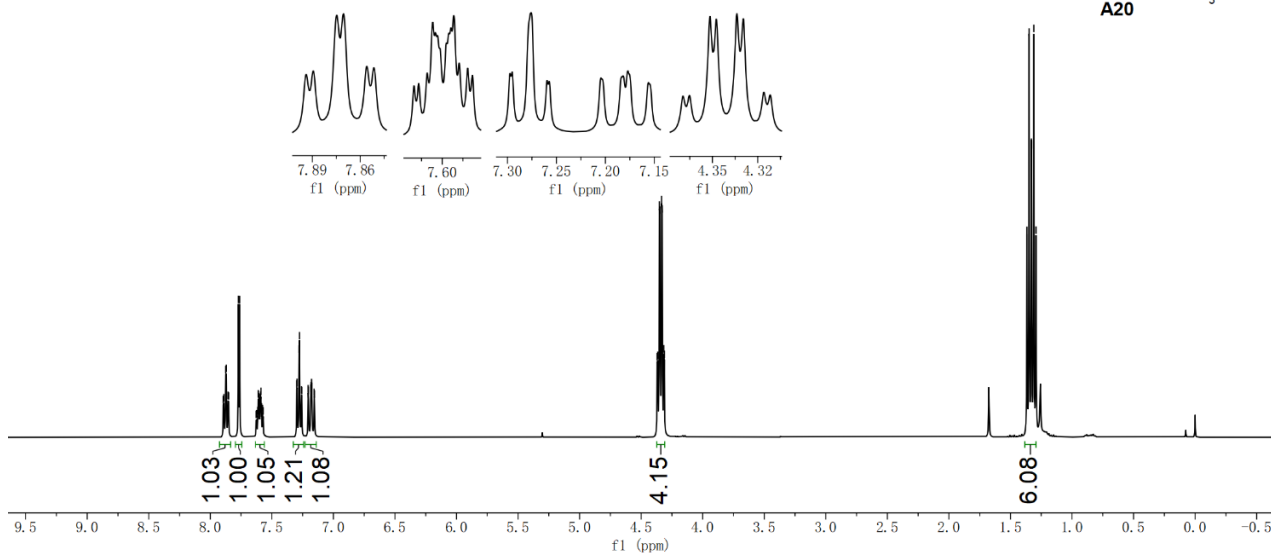

186.86  
186.83  
164.64  
163.35  
162.87  
160.80  
137.04  
136.97  
136.10  
136.08  
135.94  
135.85  
131.10  
131.08  
125.01  
124.89  
124.84  
124.81  
116.97  
116.74

62.43  
62.01

14.01  
13.81

| Parameter              | Value                   |
|------------------------|-------------------------|
| Title                  | as-20230706-TZ-2F.8.fid |
| Solvent                | CDCl <sub>3</sub>       |
| Temperature            | 295.2                   |
| Number of Scans        | 256                     |
| Spectrometer Frequency | 100.64                  |

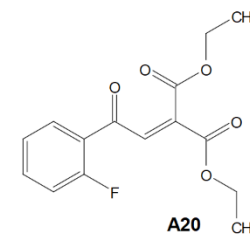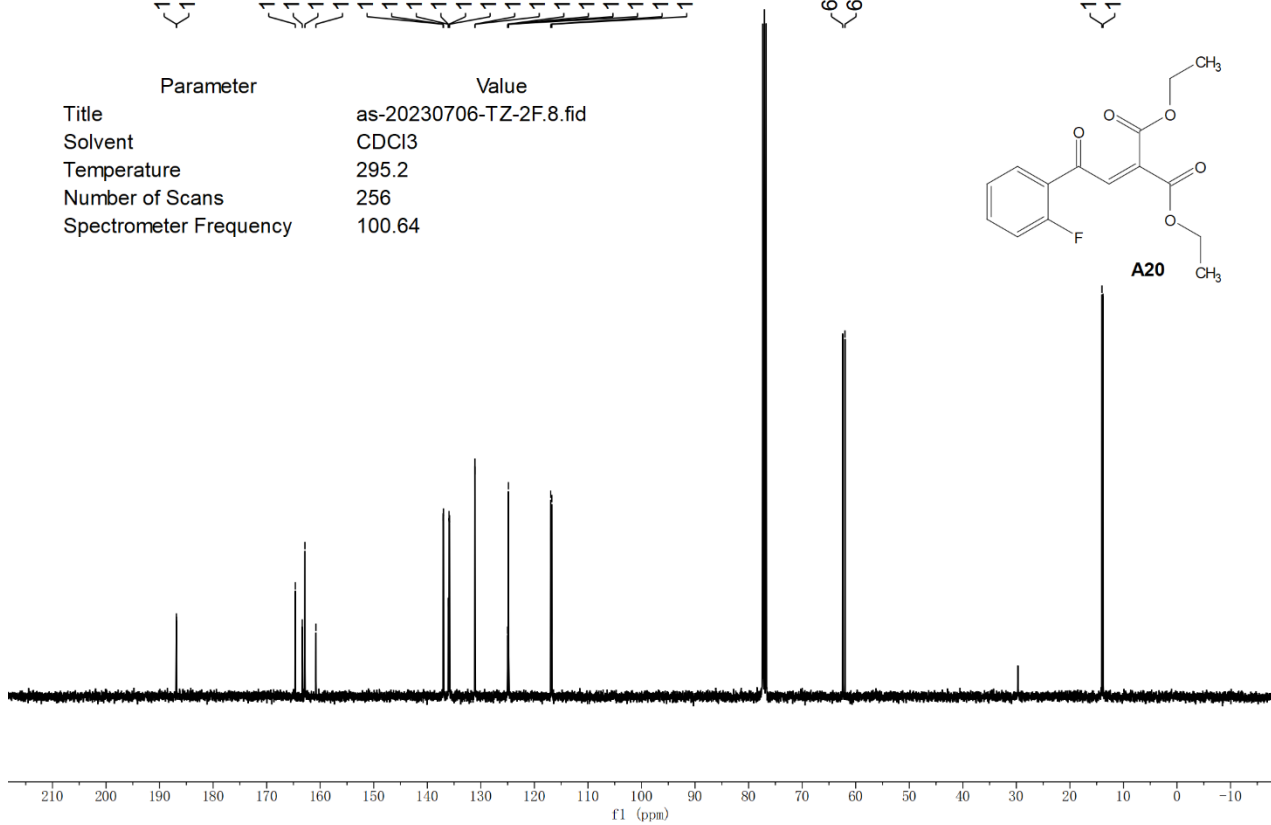

| Parameter       | Value                   |
|-----------------|-------------------------|
| Title           | as-20230706-TZ-2F.9.fid |
| Solvent         | CDCl3                   |
| Temperature     | 294.9                   |
| Number of Scans | 16                      |
| Spectrometer    | 376.51                  |

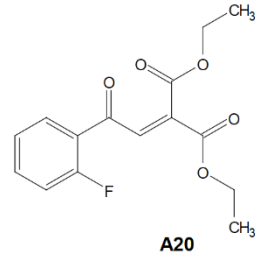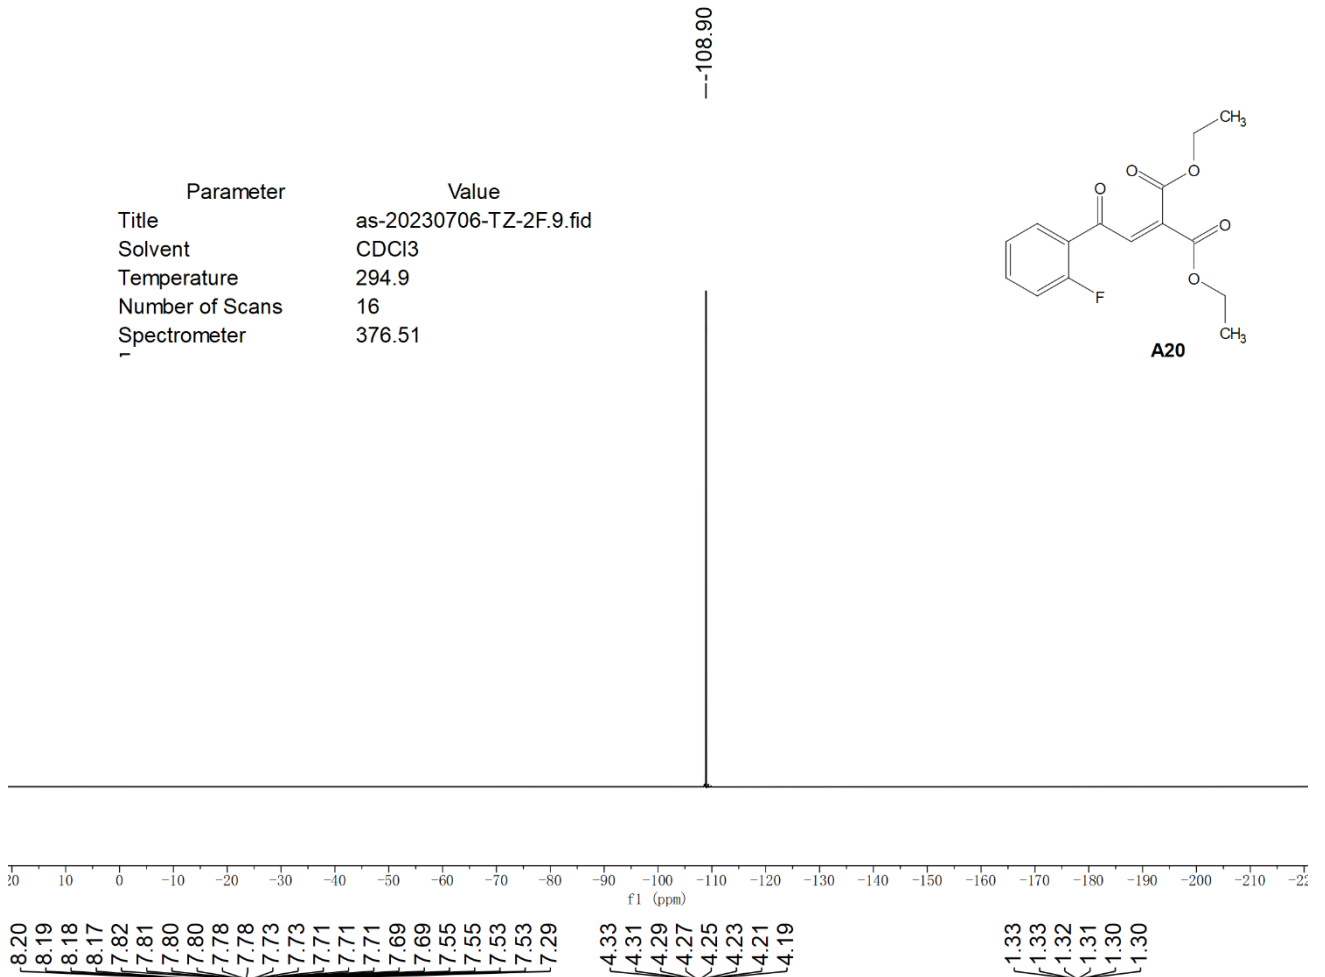

| Parameter              | Value                    |
|------------------------|--------------------------|
| Title                  | tanz-20230706-2NO2.7.fid |
| Solvent                | CDCl3                    |
| Temperature            | 294.8                    |
| Number of Scans        | 16                       |
| Spectrometer Frequency | 400.18                   |

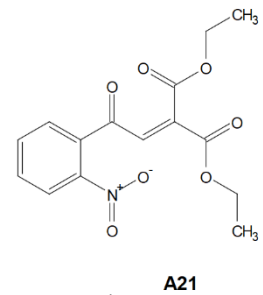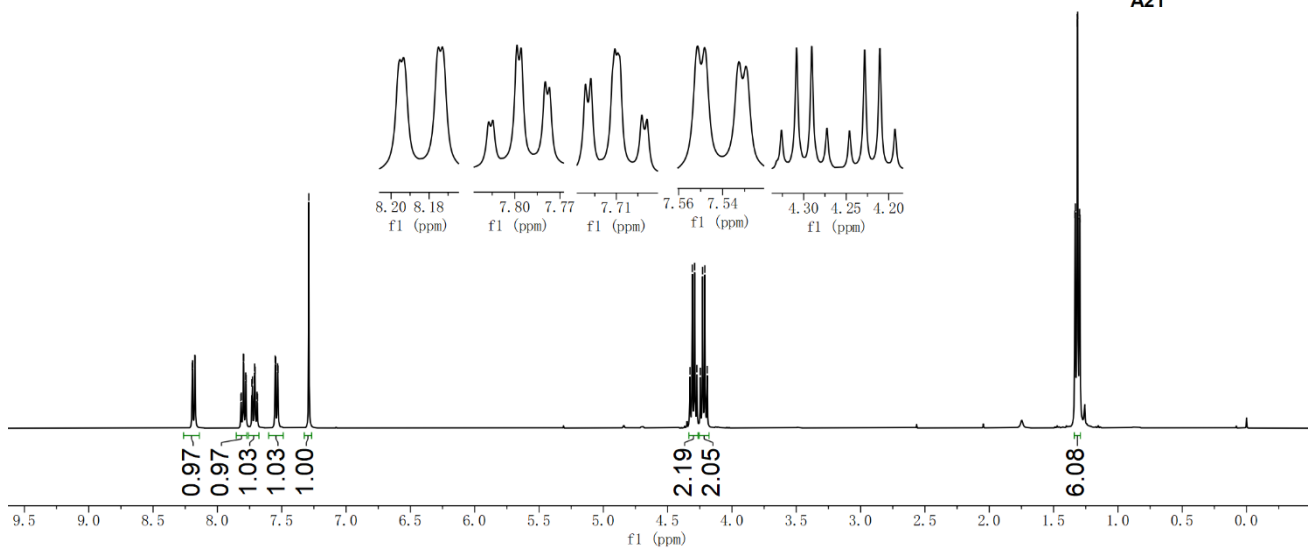



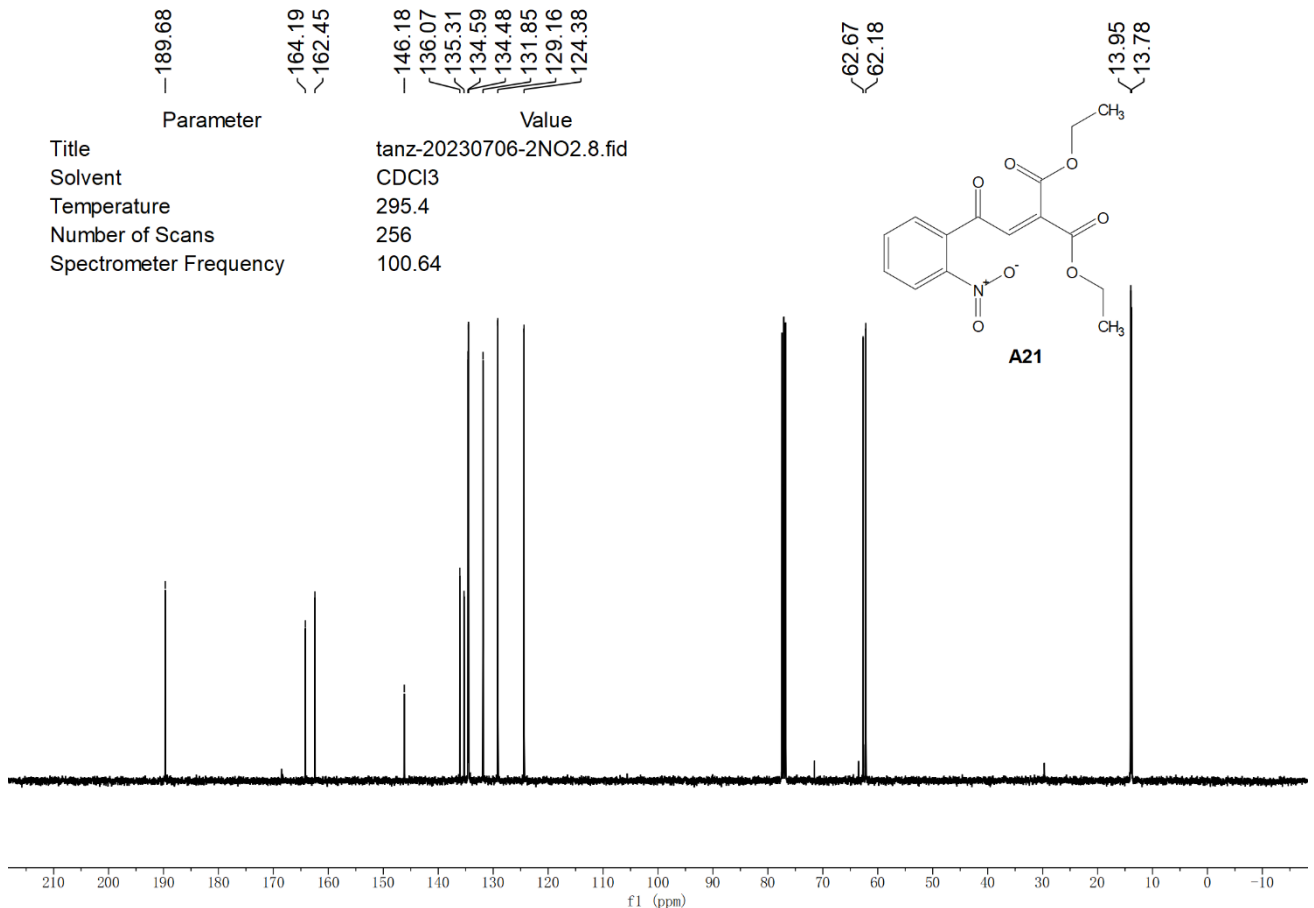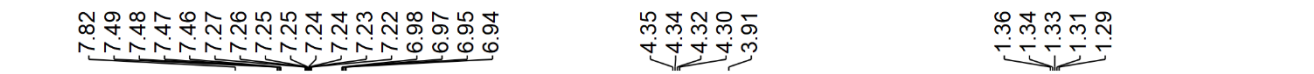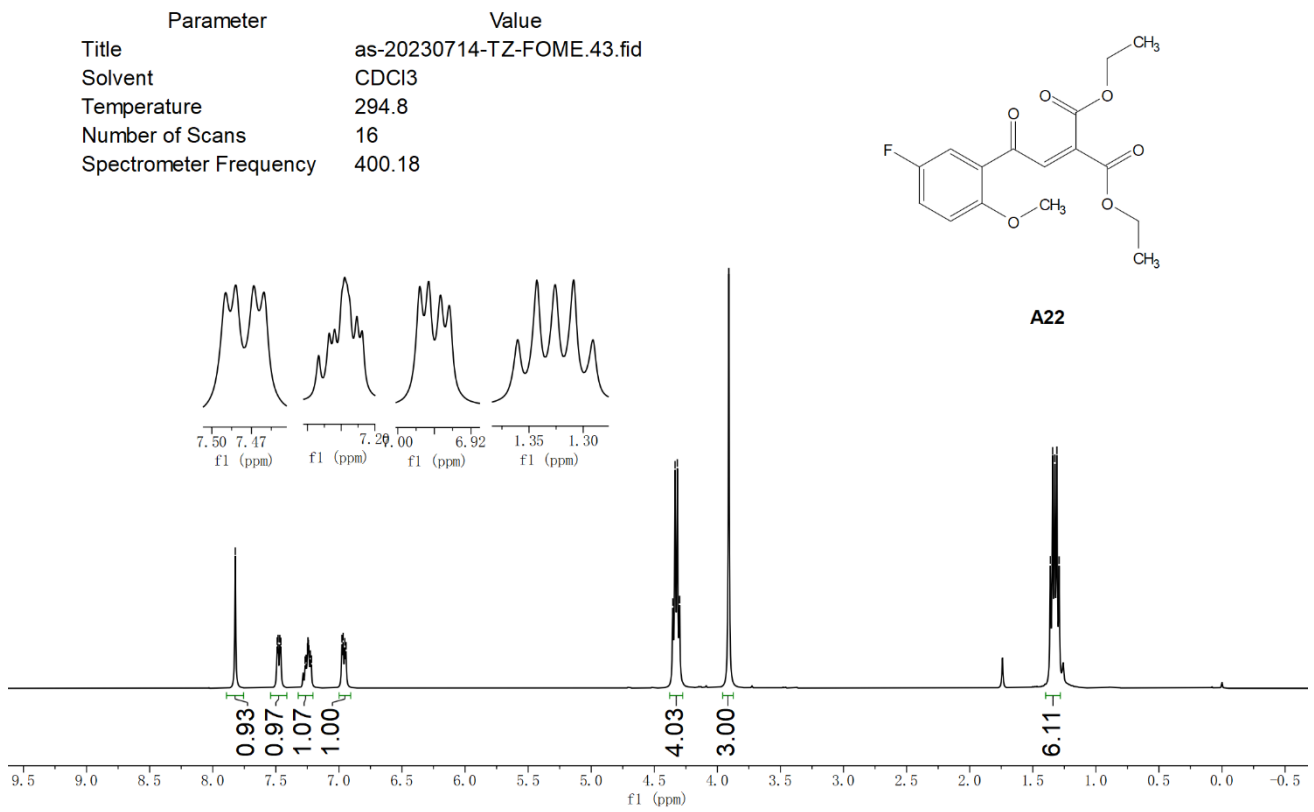

188.57  
188.55  
164.92  
163.25  
158.08  
155.78  
155.76  
155.68  
138.66  
133.97  
127.33  
127.27  
121.84  
121.61  
117.09  
116.85  
113.41  
113.34

| Parameter              | Value                      |
|------------------------|----------------------------|
| Title                  | as-20230714-TZ-FOME.44.fid |
| Solvent                | CDCl3                      |
| Temperature            | 295.2                      |
| Number of Scans        | 256                        |
| Spectrometer Frequency | 100.64                     |

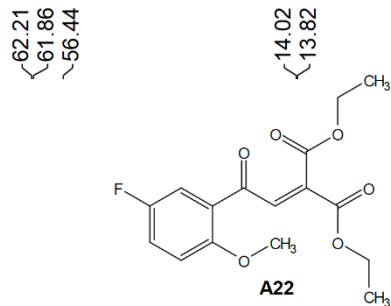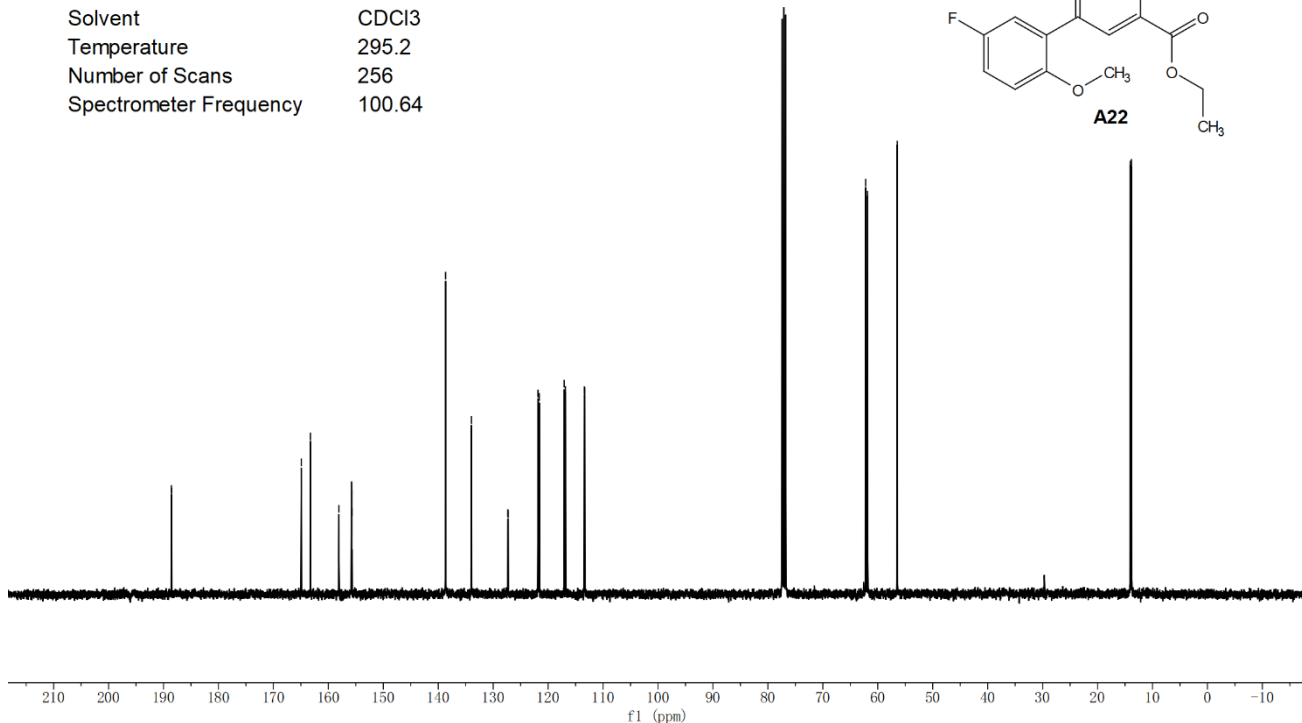

| Parameter              | Value                      |
|------------------------|----------------------------|
| Title                  | as-20230714-TZ-FOME.45.fid |
| Solvent                | CDCl3                      |
| Temperature            | 294.8                      |
| Number of Scans        | 16                         |
| Spectrometer Frequency | 376.51                     |

122.56

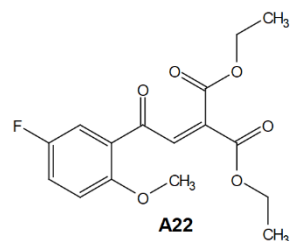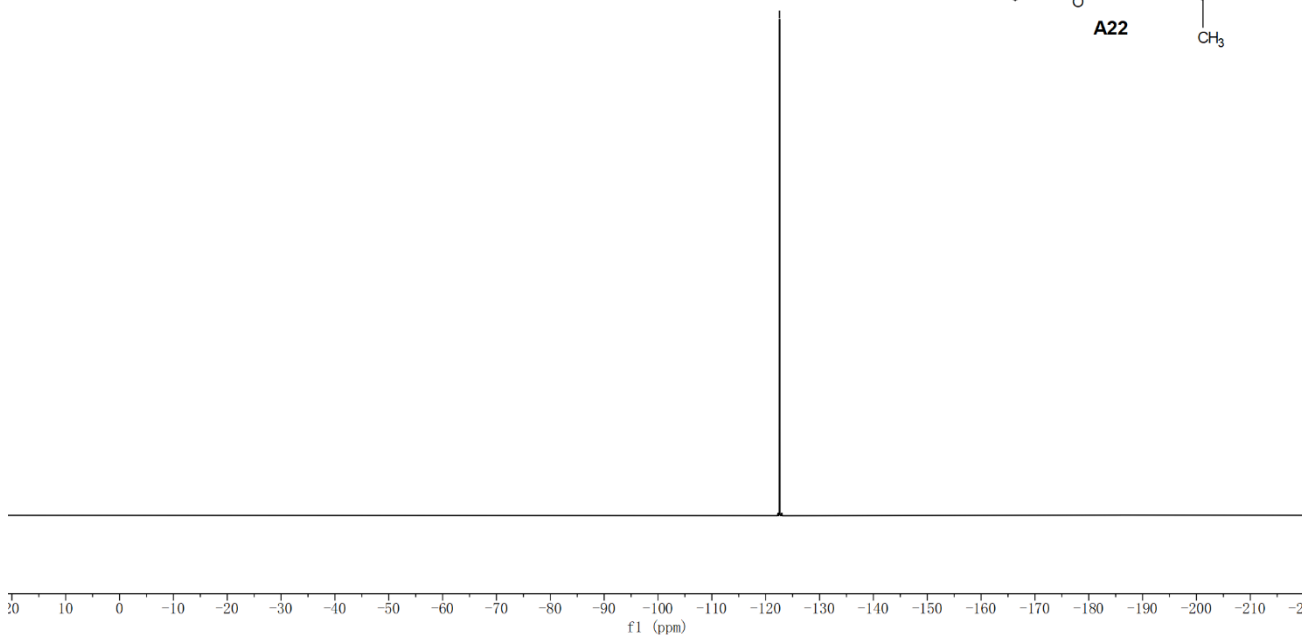

7.97  
7.95  
7.95  
7.93  
7.93  
7.91  
7.74  
7.73  
7.04  
7.04  
7.03  
7.02  
7.02  
7.02  
7.01  
7.00  
7.00  
6.99  
6.95  
6.95  
6.93  
6.93  
6.92  
6.90  
6.90  
4.38  
4.37  
4.36  
4.35  
4.34  
4.33  
4.32  
4.31  
1.37  
1.35  
1.33  
1.32  
1.30

| Parameter              | Value                      |
|------------------------|----------------------------|
| Title                  | as-20230714-TZ-242F.37.fid |
| Solvent                | CDCl3                      |
| Temperature            | 294.6                      |
| Number of Scans        | 16                         |
| Spectrometer Frequency | 400.18                     |

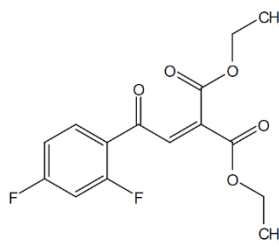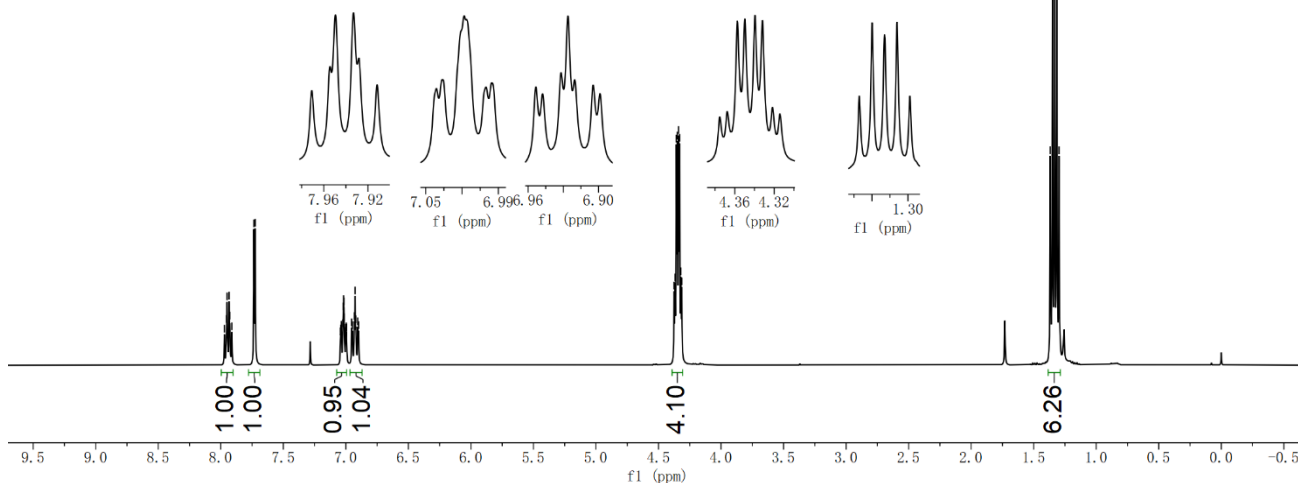

185.37  
185.34  
167.95  
167.83  
165.37  
165.25  
164.54  
164.27  
164.15  
162.76  
161.70  
161.57  
136.74  
136.67  
136.40  
136.38  
133.24  
133.20  
133.13  
133.10  
121.63  
121.60  
121.52  
121.48  
112.89  
112.86  
112.67  
112.64  
105.31  
105.05  
105.04  
104.79  
62.48  
62.03  
13.98  
13.80

| Parameter              | Value                      |
|------------------------|----------------------------|
| Title                  | as-20230714-TZ-242F.38.fid |
| Solvent                | CDCl3                      |
| Temperature            | 295.1                      |
| Number of Scans        | 256                        |
| Spectrometer Frequency | 100.64                     |

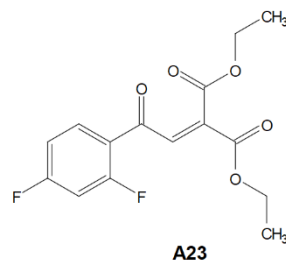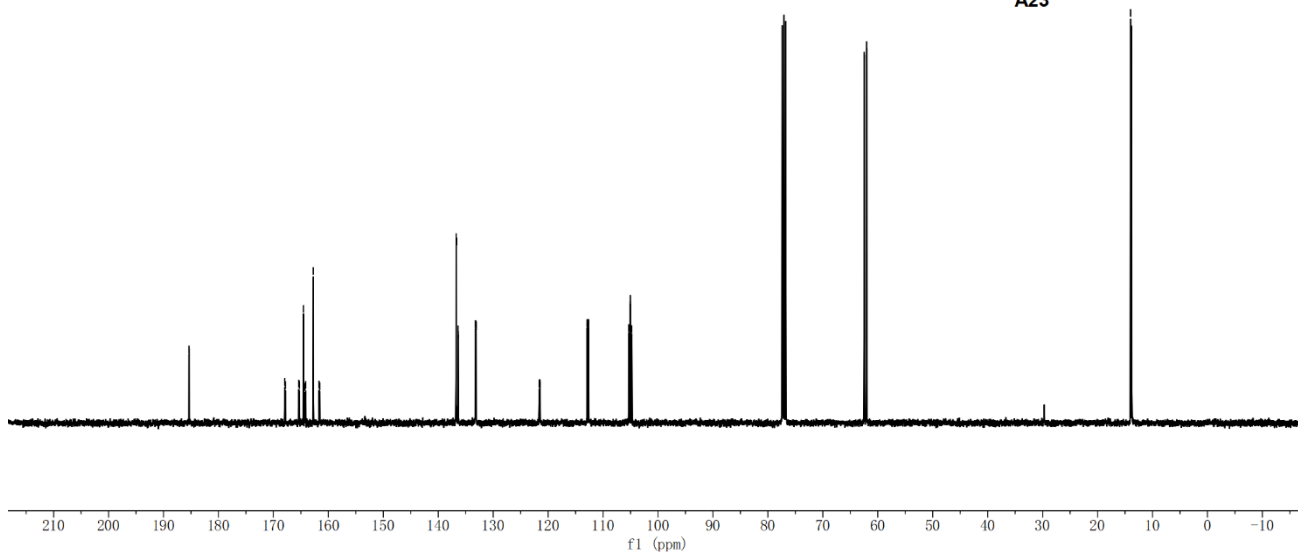

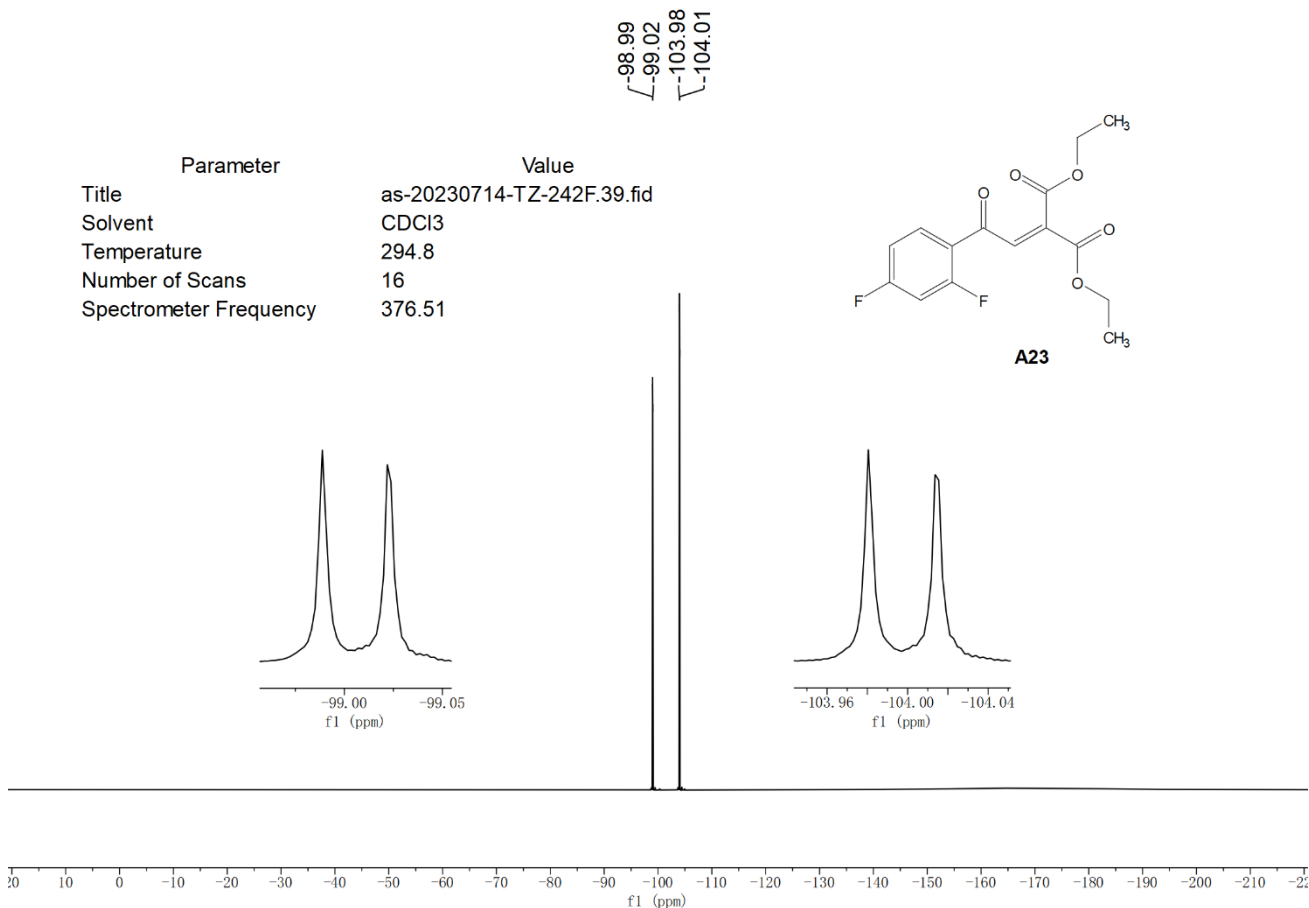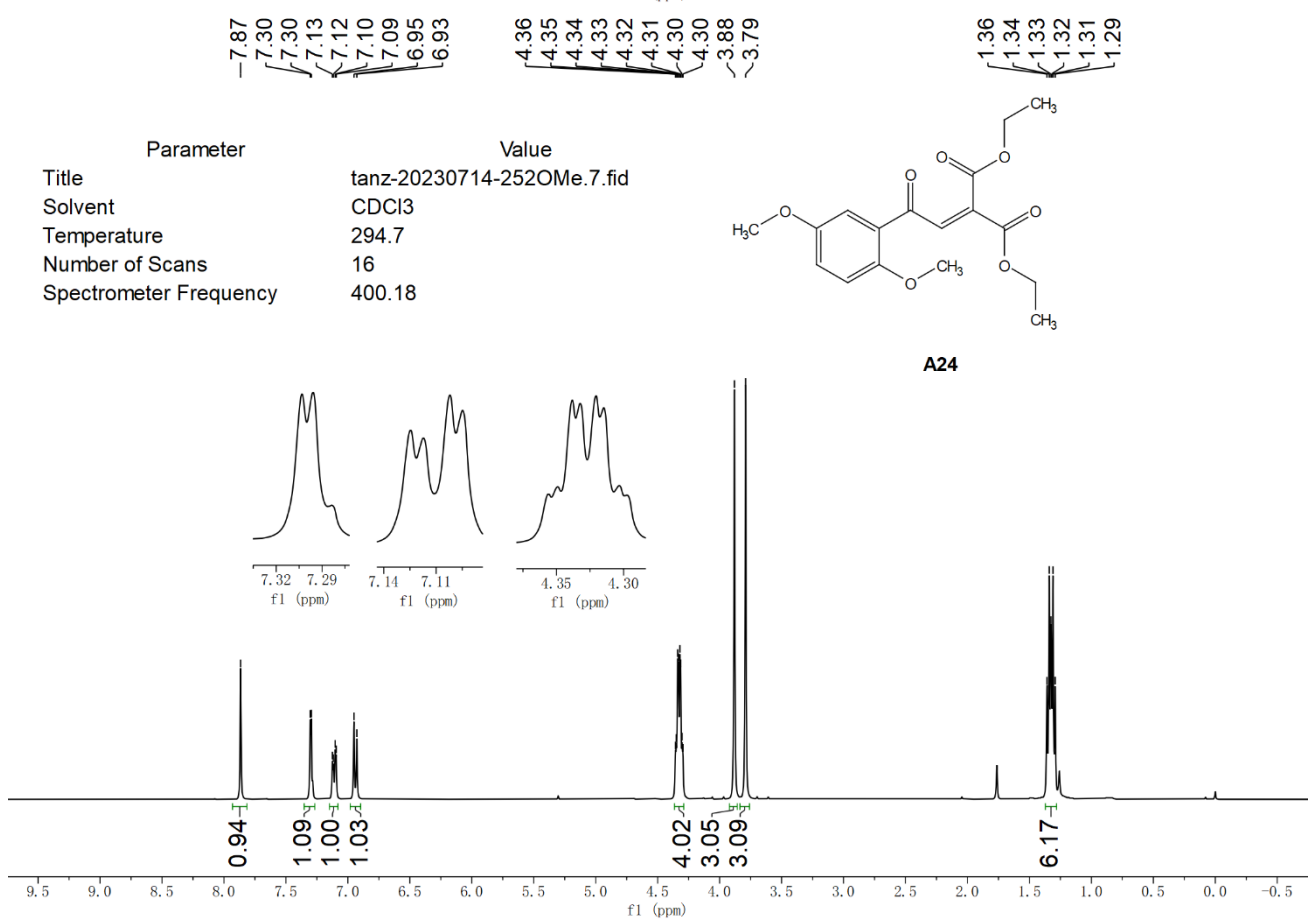

-189.33  
 ~165.15  
 ~163.41  
 ~154.22  
 ~153.73  
 ~139.34  
 ~133.48  
 ~126.69  
 ~122.53  
 ~113.64  
 ~113.60

62.11  
 61.78  
 56.40  
 55.83

14.03  
 13.86

| Parameter              | Value                      |
|------------------------|----------------------------|
| Title                  | tanz-20230714-252OMe.8.fid |
| Solvent                | CDCl3                      |
| Temperature            | 295.0                      |
| Number of Scans        | 256                        |
| Spectrometer Frequency | 100.64                     |

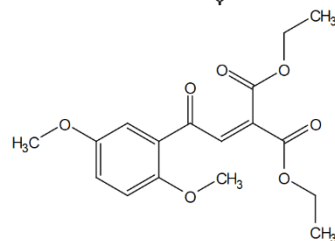

A24

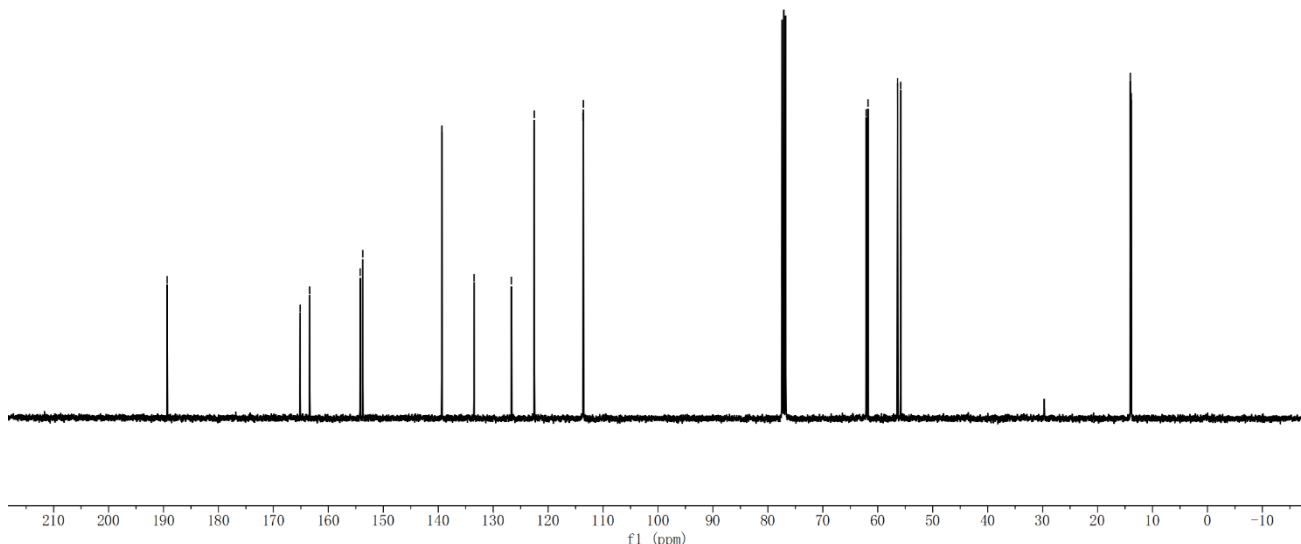

7.85  
 7.85  
 7.84  
 7.84  
 7.80  
 7.79  
 7.78  
 7.78  
 7.74  
 7.21  
 7.20  
 7.20  
 7.19

4.40  
 4.38  
 4.37  
 4.36  
 4.35  
 4.34  
 4.34  
 4.32

1.37  
 1.35  
 1.35  
 1.33  
 1.33  
 1.31

| Parameter              | Value                    |
|------------------------|--------------------------|
| Title                  | tanz-20230719-THIO.5.fid |
| Solvent                | CDCl3                    |
| Temperature            | 294.3                    |
| Number of Scans        | 16                       |
| Spectrometer Frequency | 400.18                   |

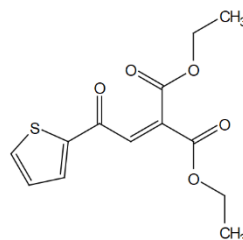

A25

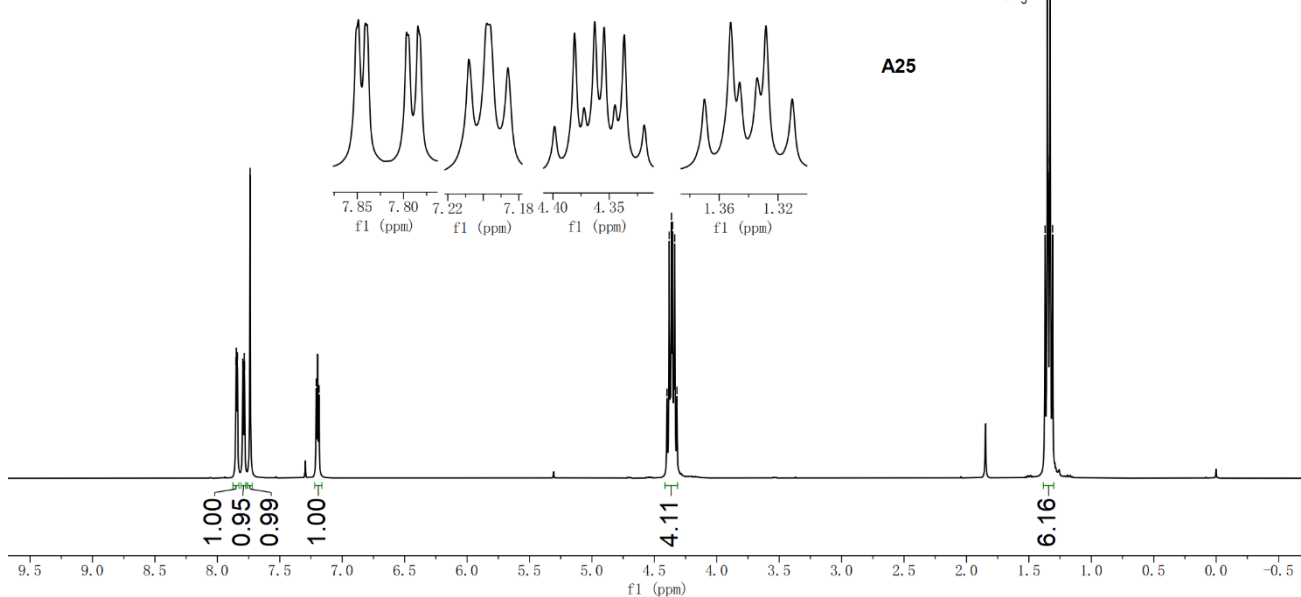

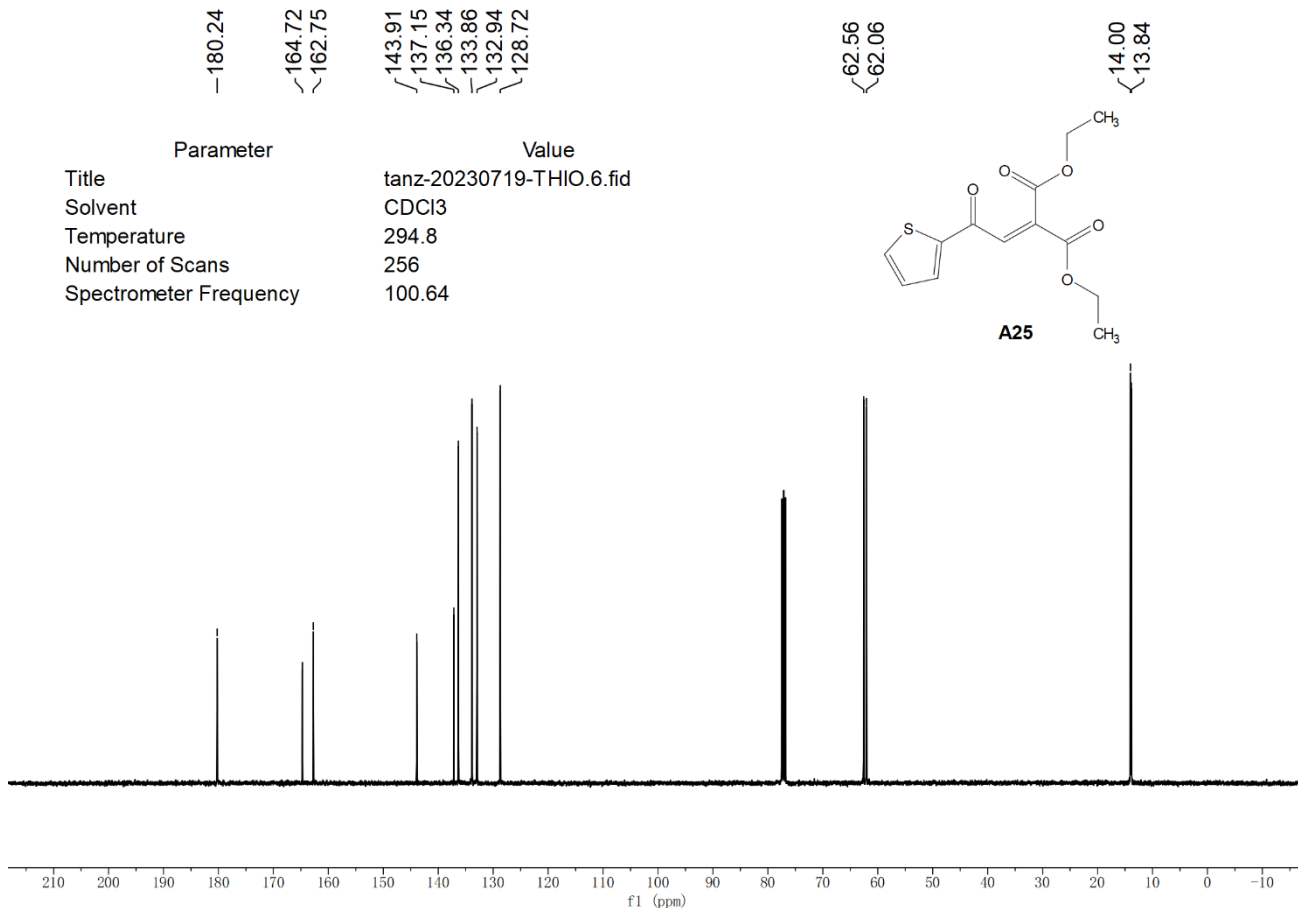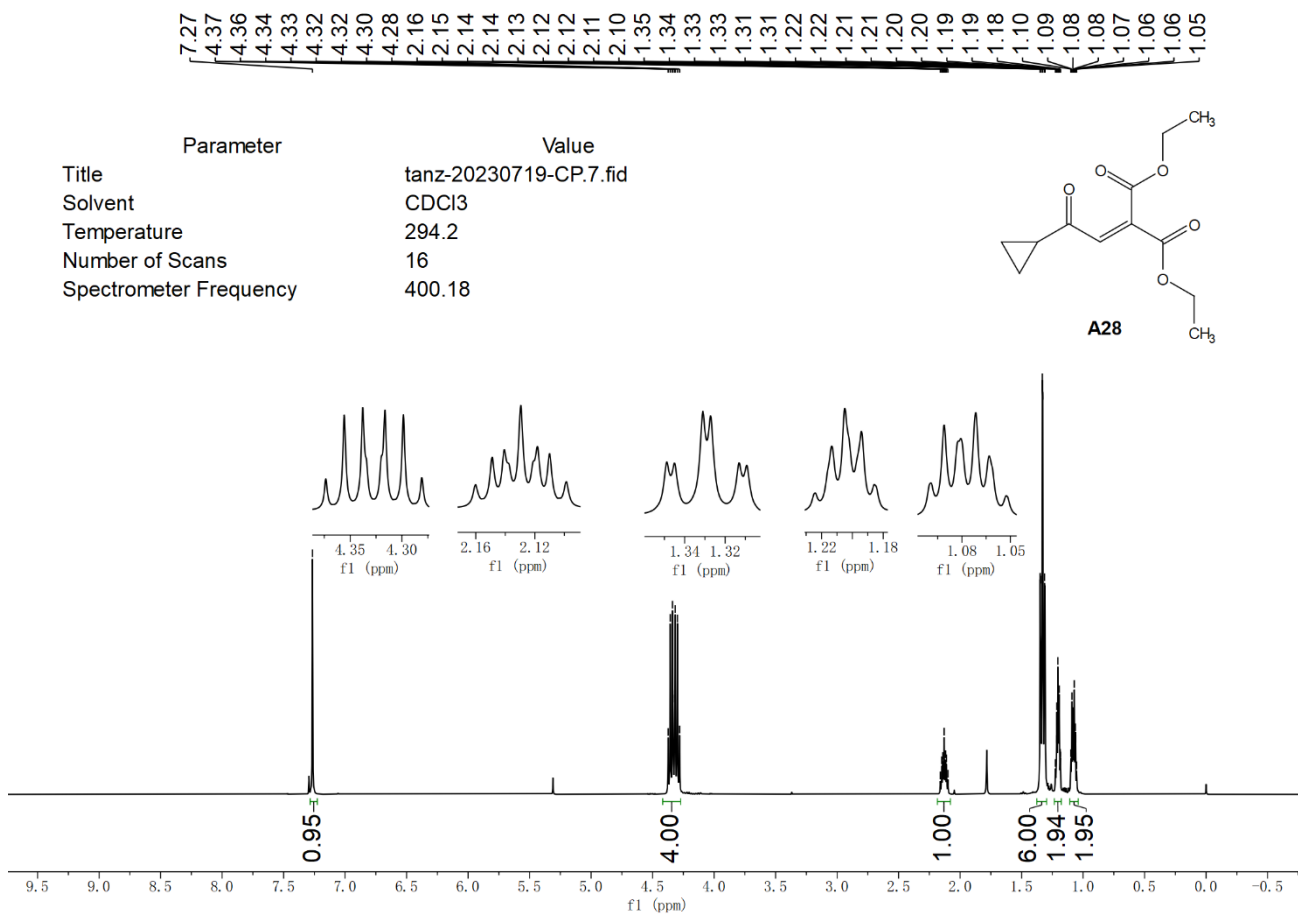

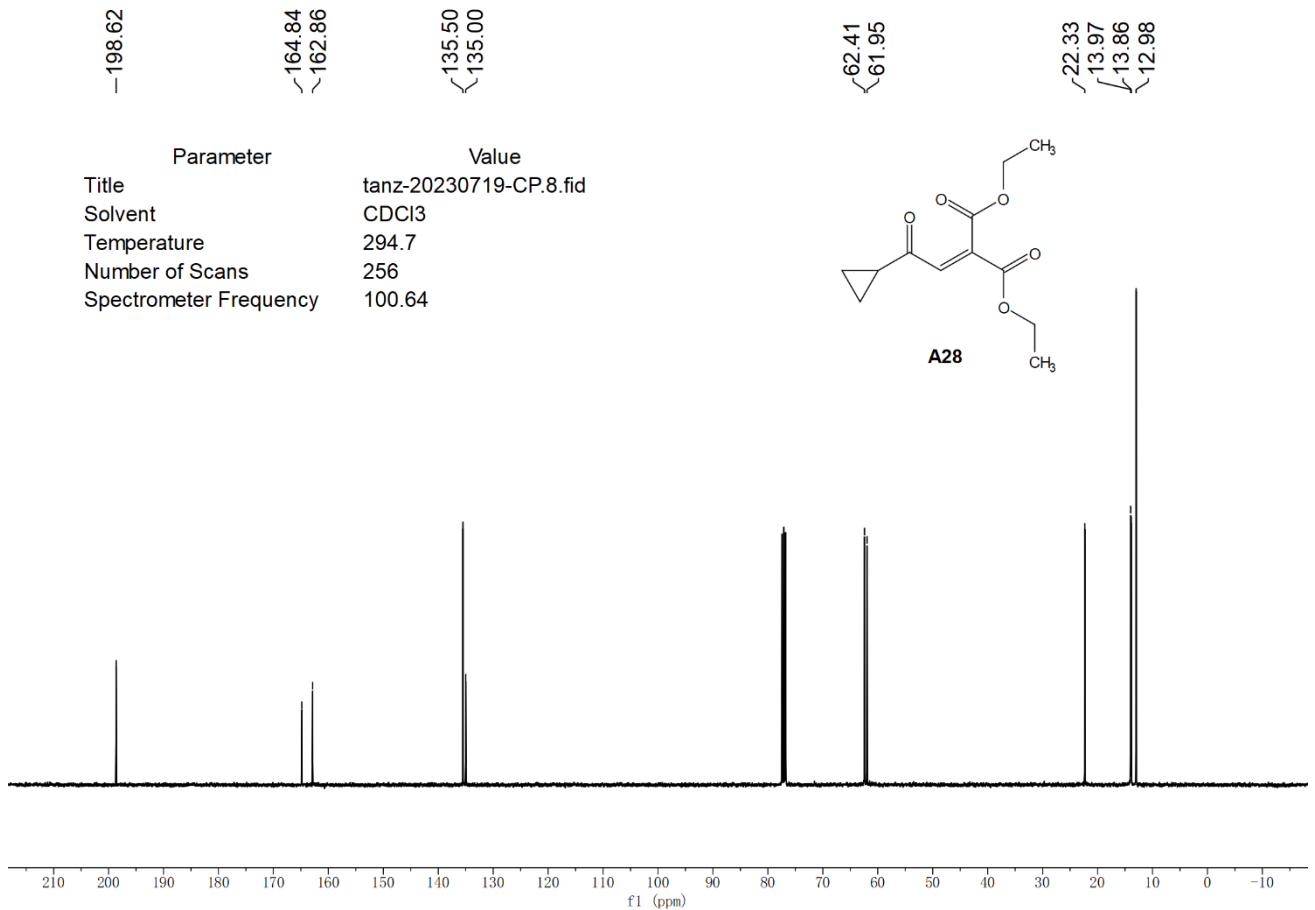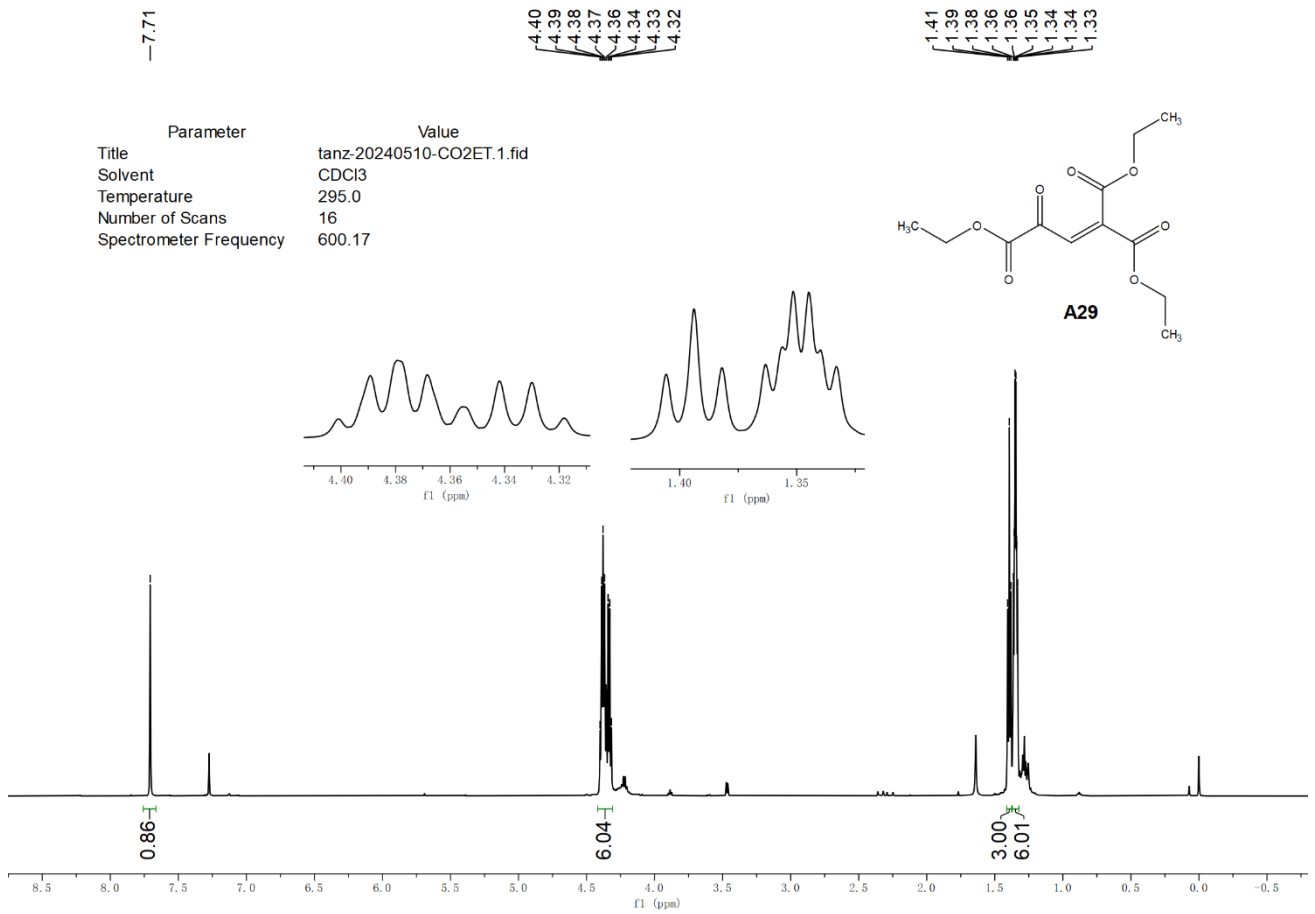

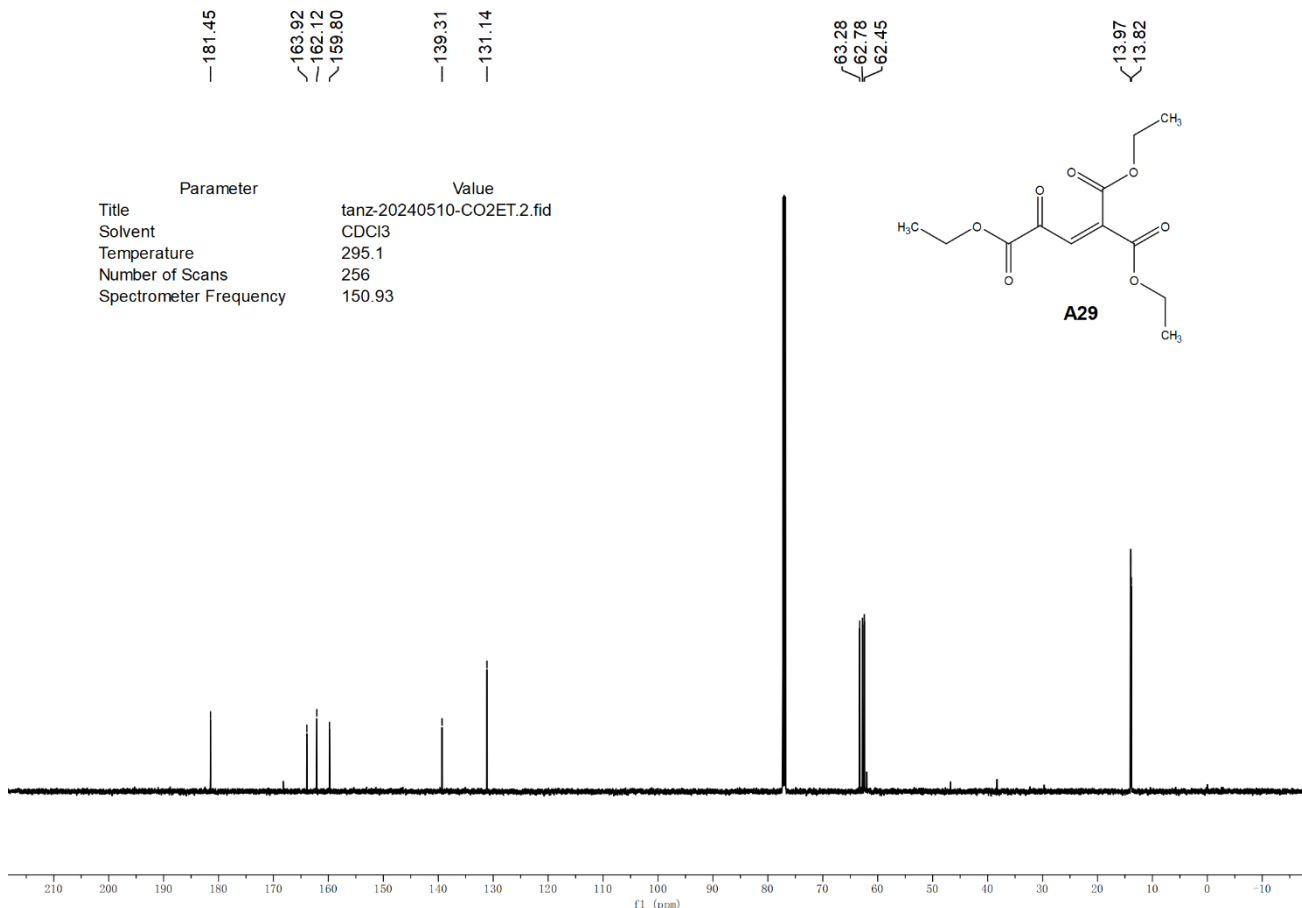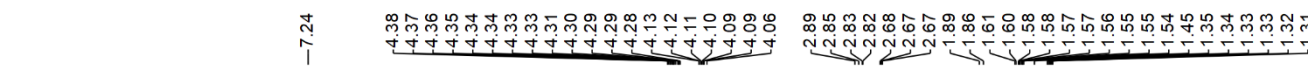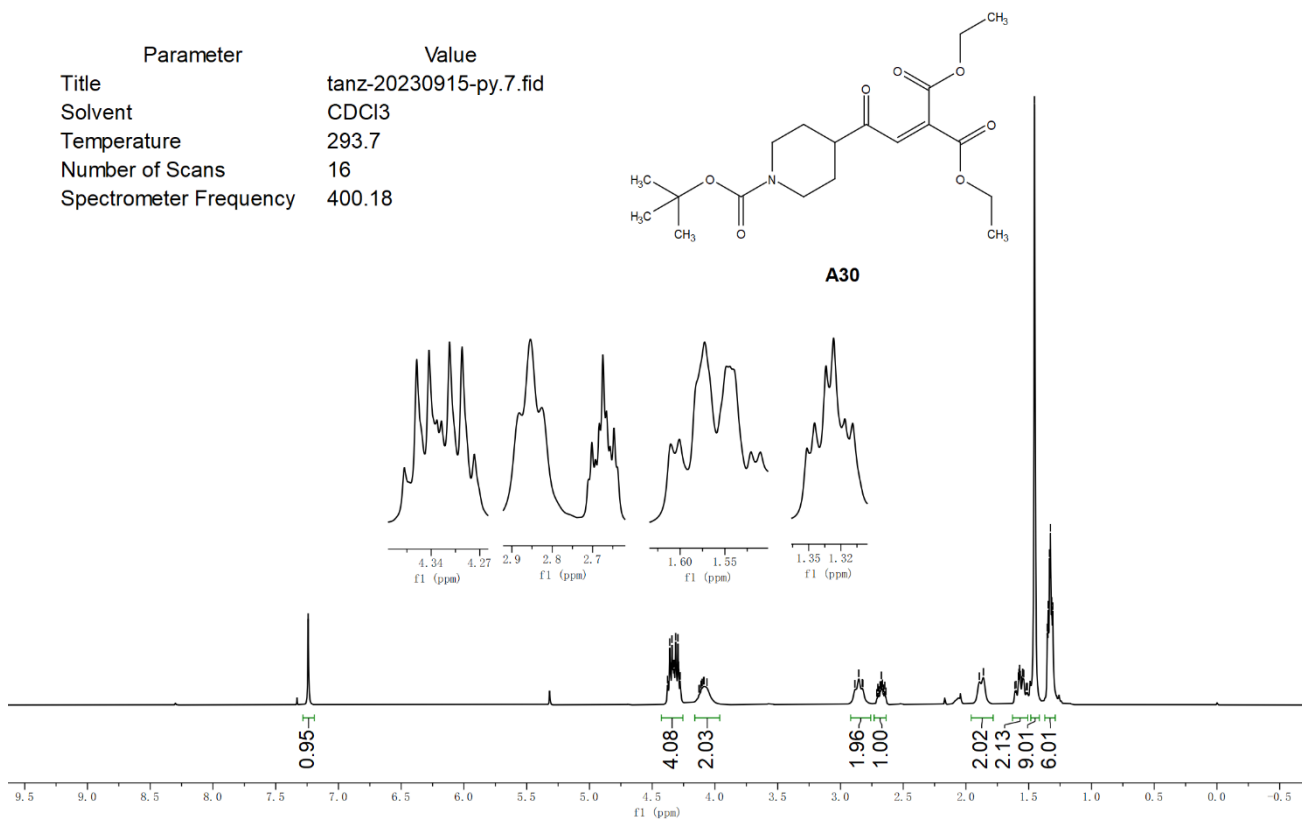



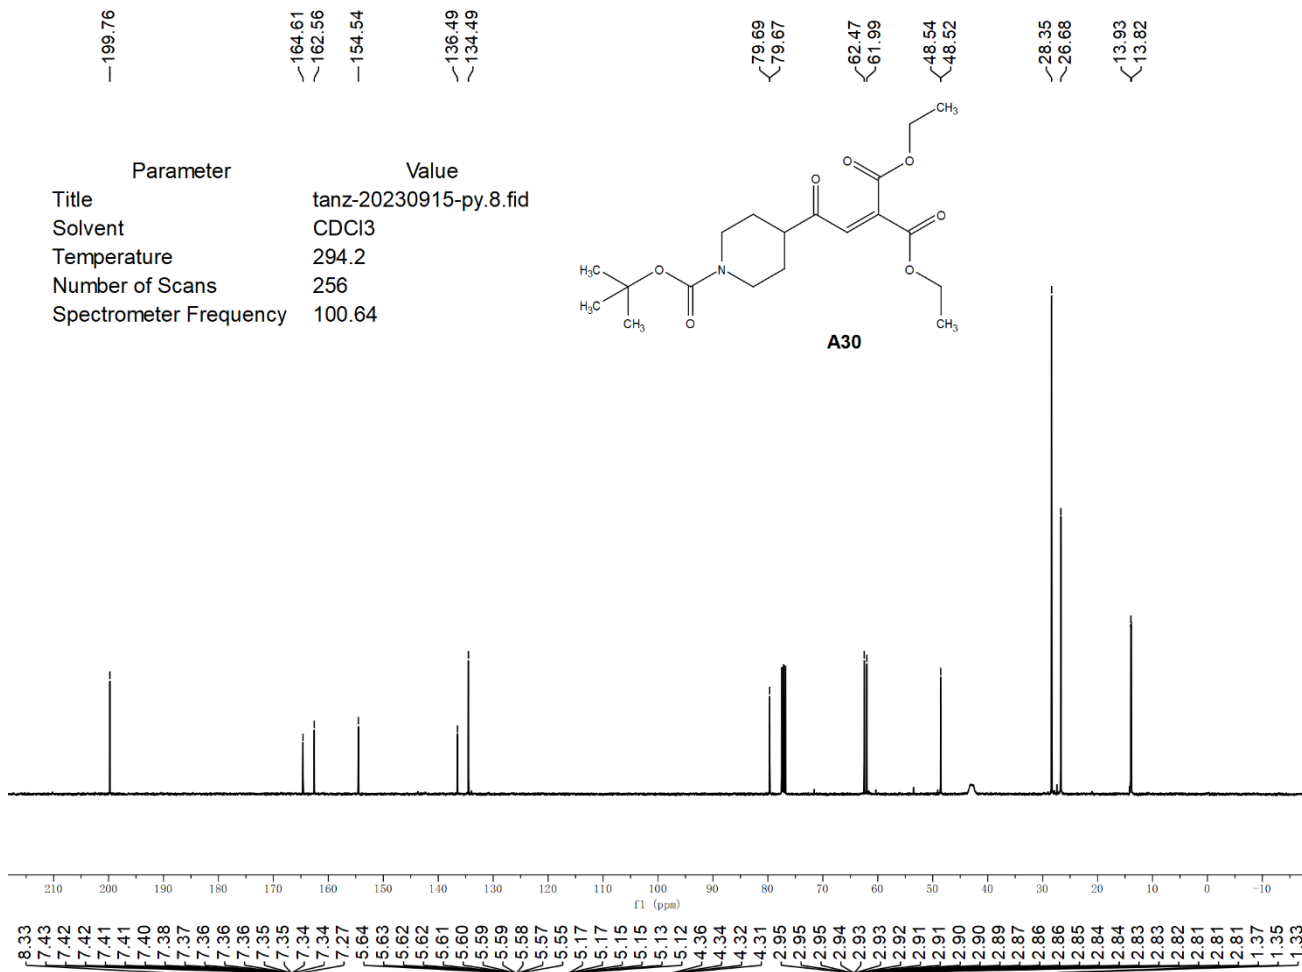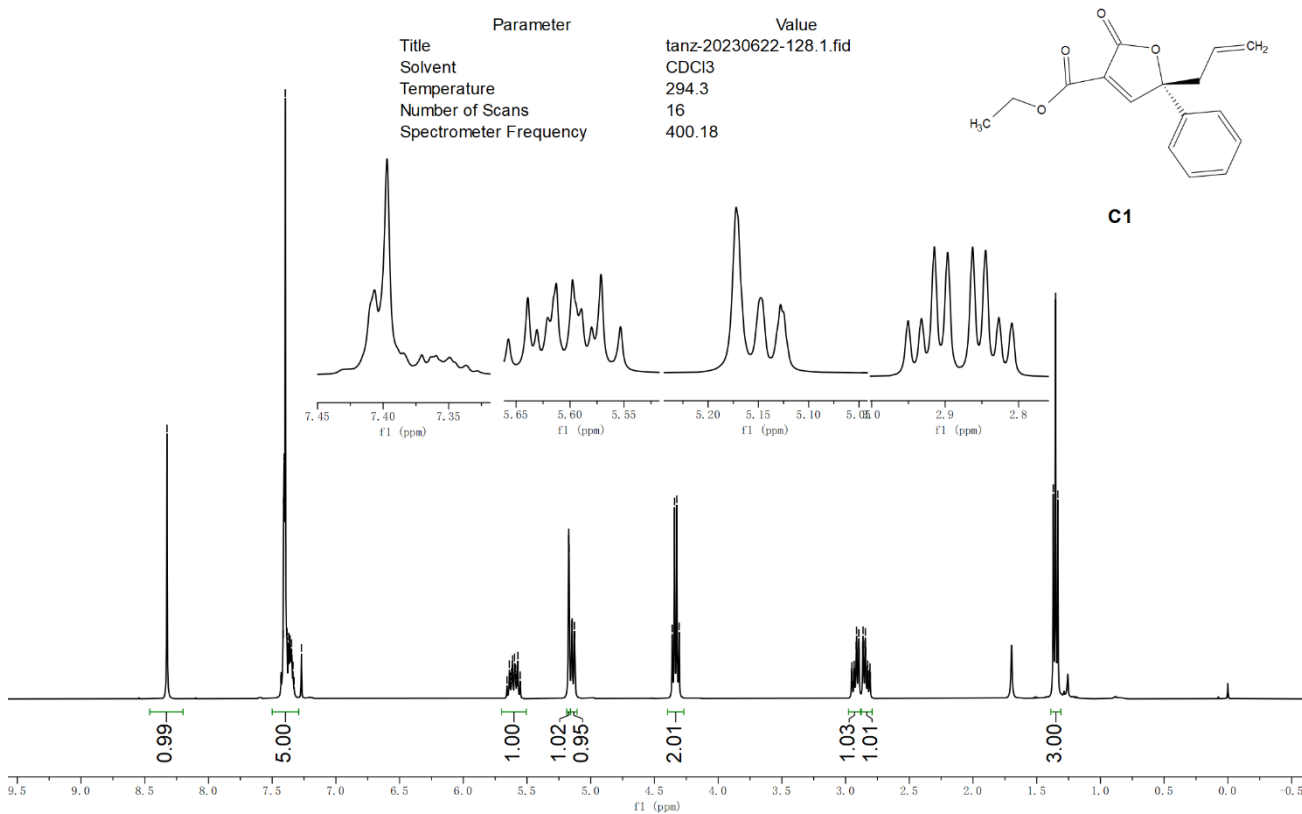

Parameter Value  
 Title tanz-20230622-128.2.fid  
 Solvent CDCl3  
 Temperature 295.1  
 Number of Scans 256  
 Spectrometer Frequency 100.64

166.59  
 164.94  
 160.06

137.23  
 129.63  
 129.06  
 128.74  
 125.16  
 124.68  
 121.23

87.88  
 77.39  
 77.07  
 76.75

61.85

43.86

14.14

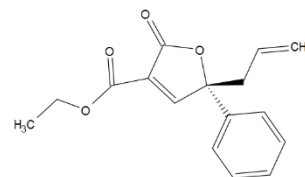

C1

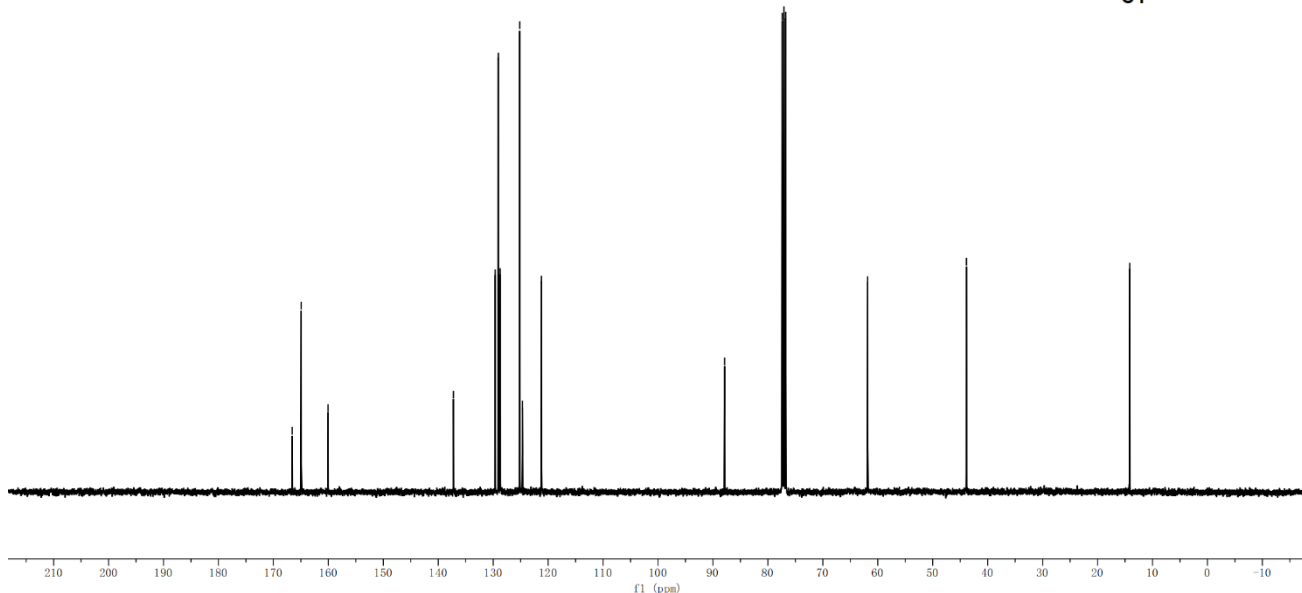

8.30  
 7.29  
 7.28  
 7.27  
 7.26  
 7.21  
 7.19  
 7.19  
 5.64  
 5.62  
 5.61  
 5.61  
 5.60  
 5.59  
 5.57  
 5.55  
 5.17  
 5.14  
 5.14  
 5.12  
 5.12  
 4.36  
 4.34  
 4.32  
 4.30  
 2.93  
 2.92  
 2.92  
 2.91  
 2.90  
 2.90  
 2.89  
 2.88  
 2.88  
 2.87  
 2.85  
 2.85  
 2.84  
 2.83  
 2.83  
 2.83  
 2.81  
 2.81  
 2.80  
 2.80  
 2.79  
 2.79  
 2.35  
 1.37  
 1.35  
 1.33

Parameter Value  
 Title tanz-20230622-129.5.fid  
 Solvent CDCl3  
 Temperature 294.5  
 Number of Scans 16  
 Spectrometer Frequency 400.18

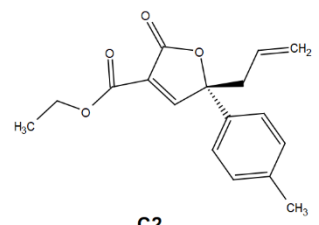

C2

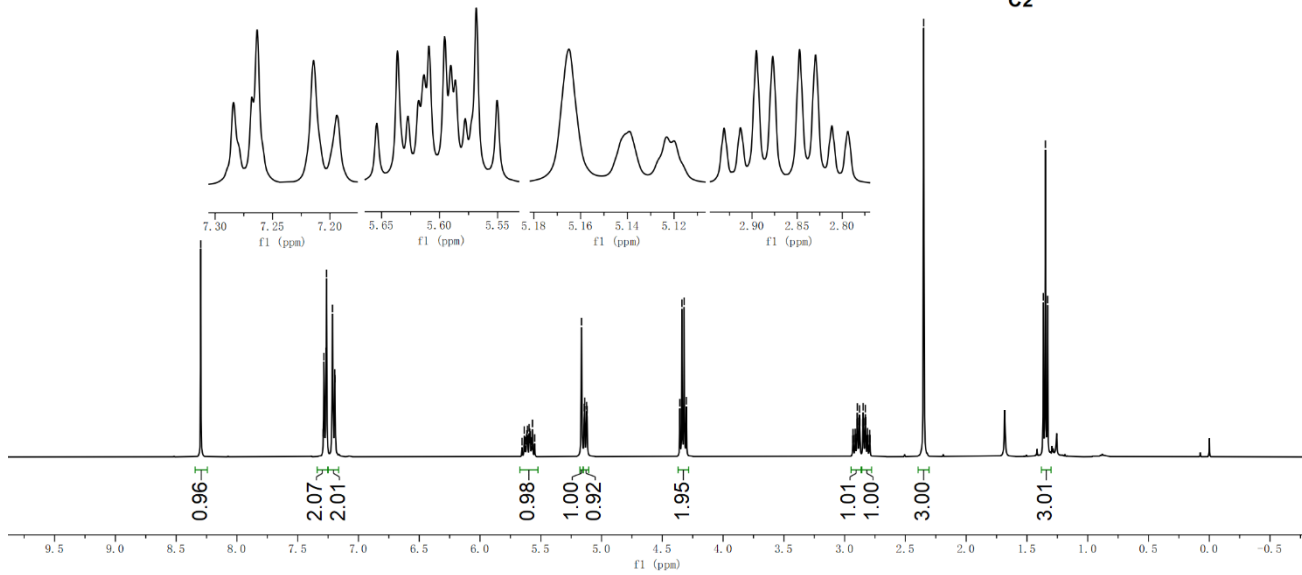

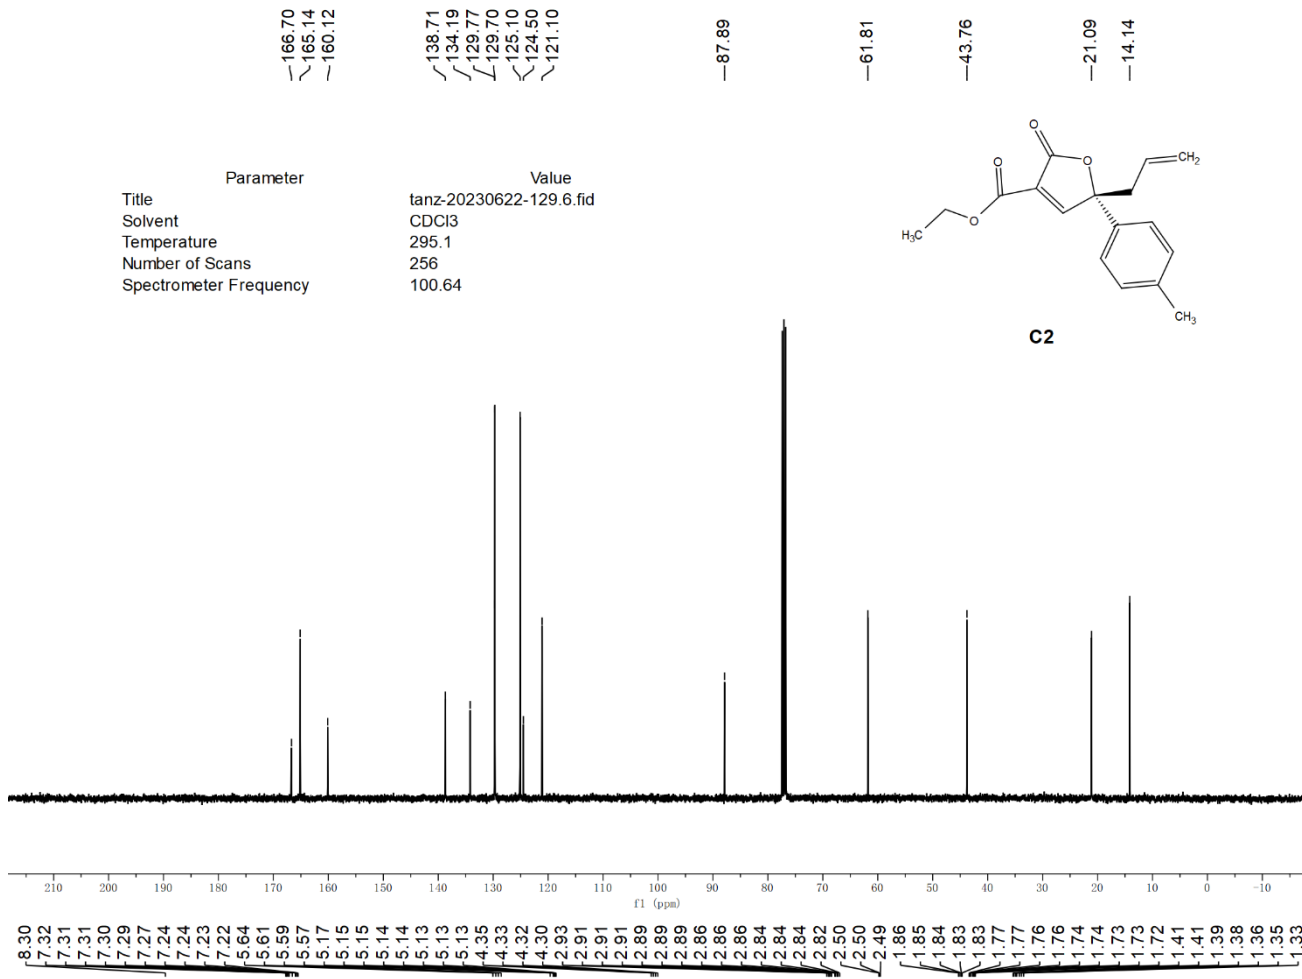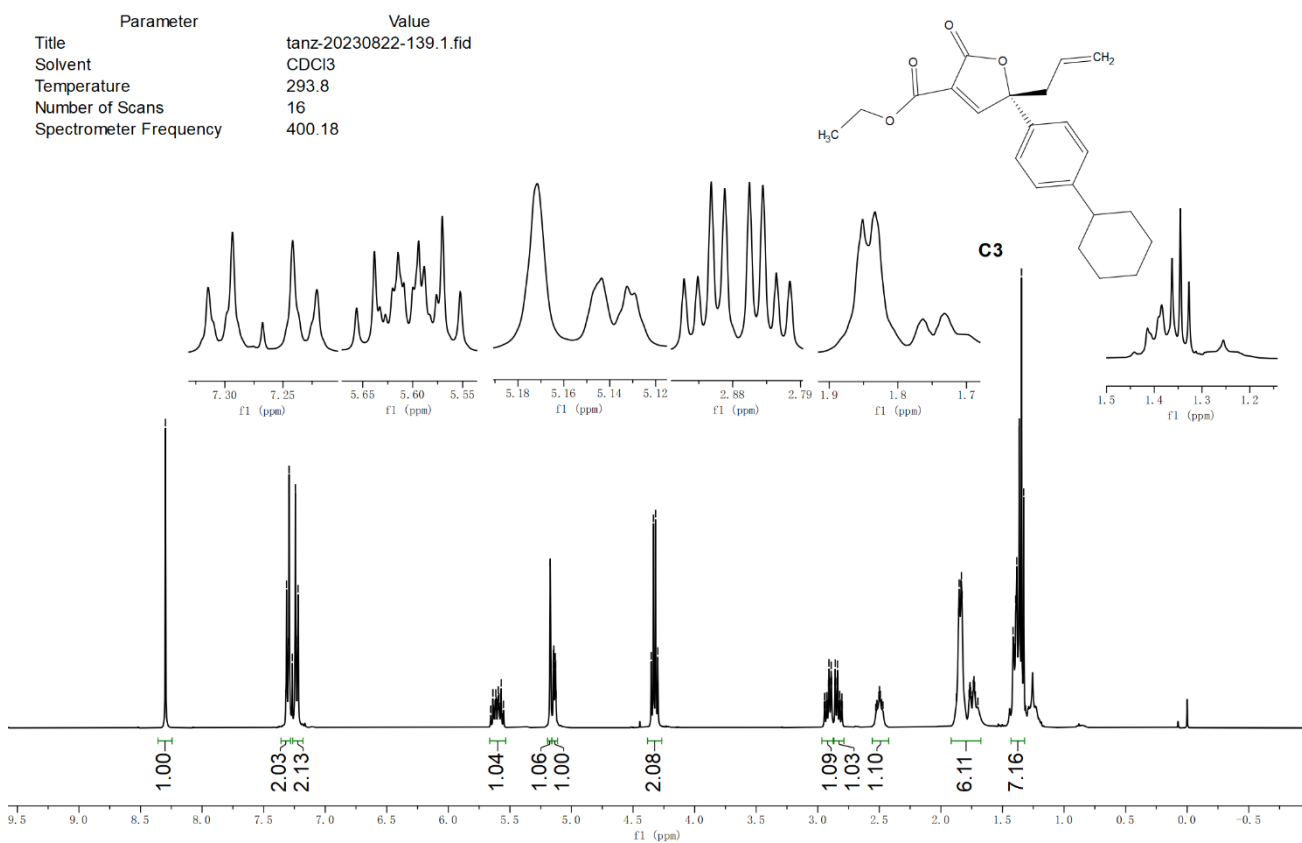

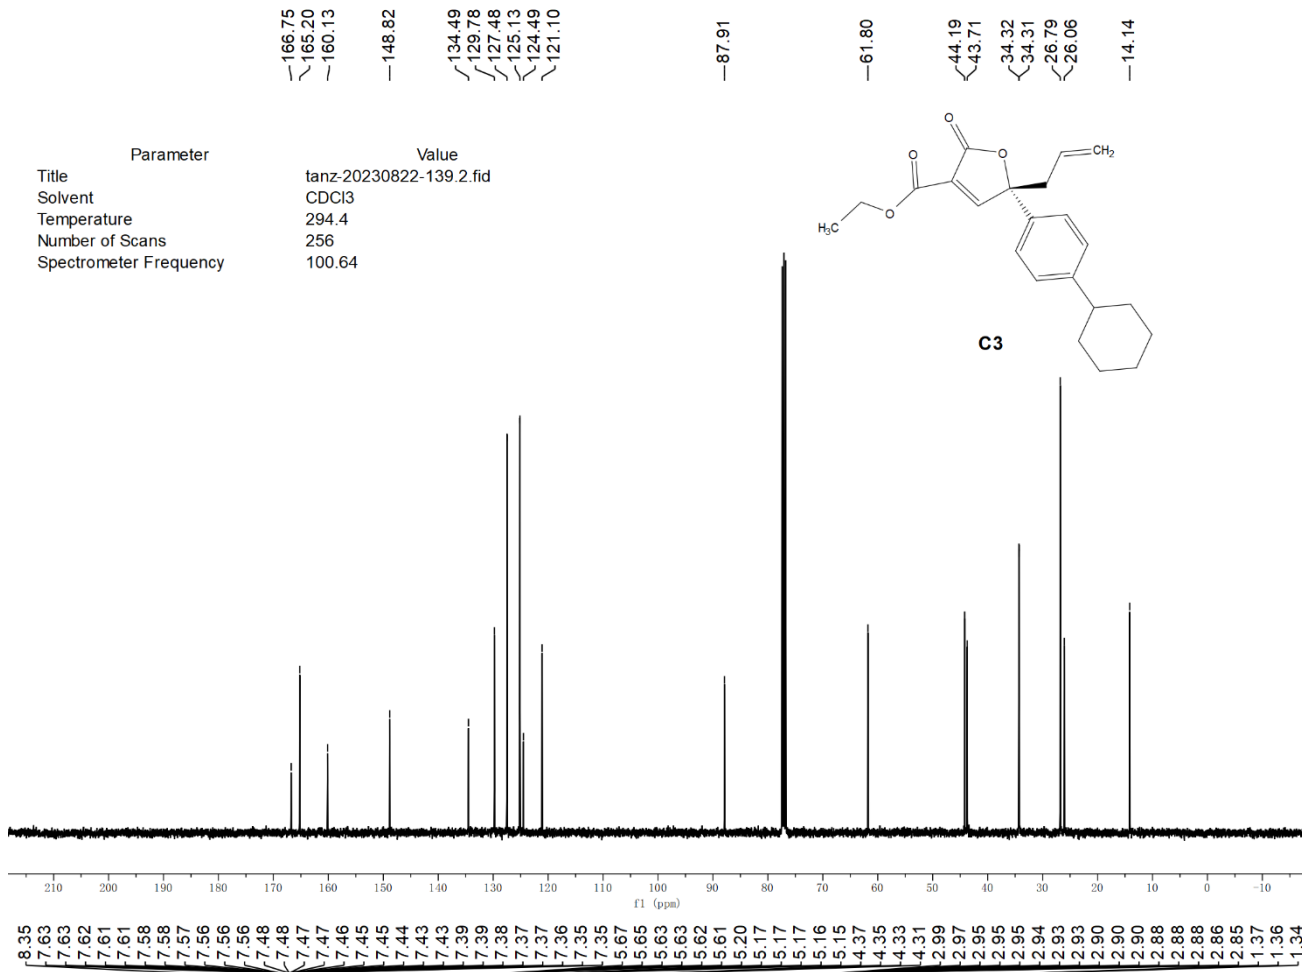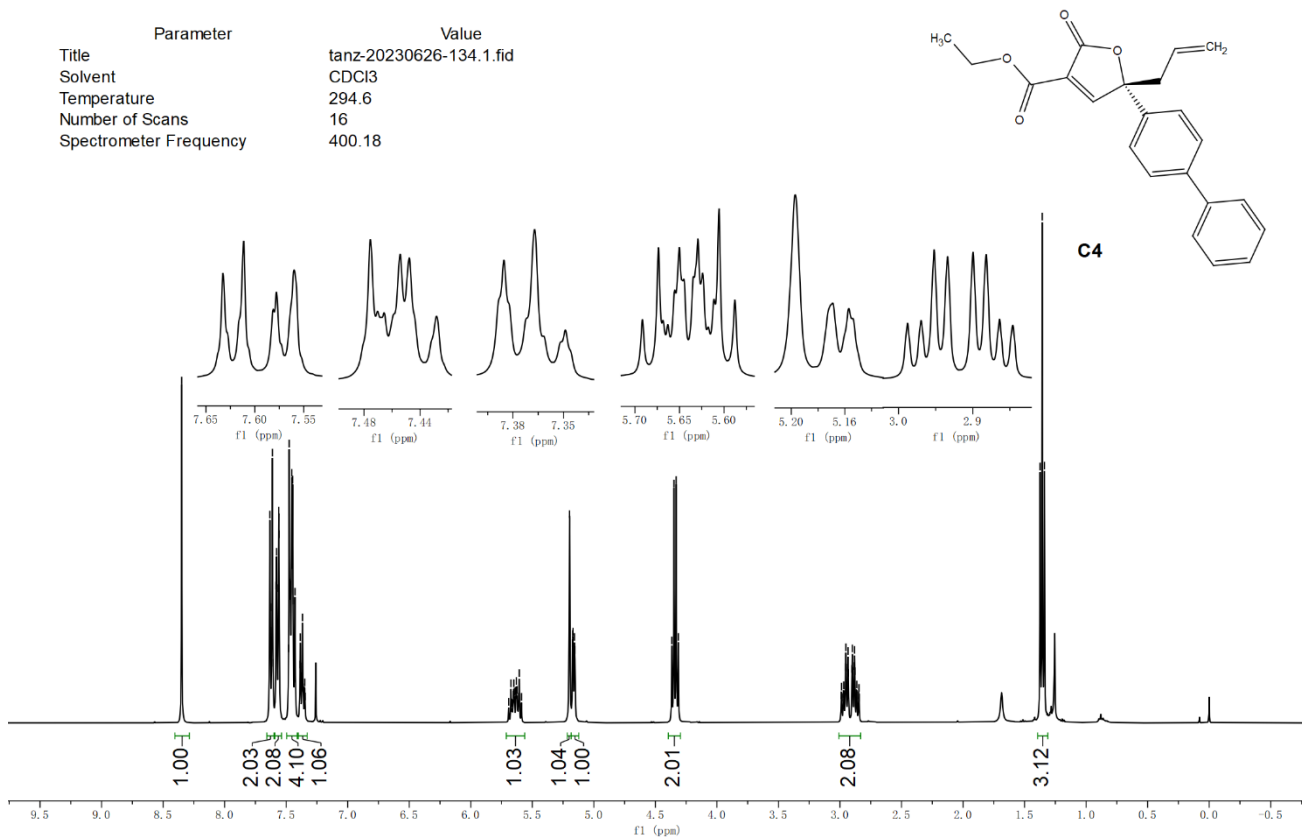

| Parameter              | Value                   |
|------------------------|-------------------------|
| Title                  | tanz-20230626-134.2.fid |
| Solvent                | CDCl3                   |
| Temperature            | 295.3                   |
| Number of Scans        | 256                     |
| Spectrometer Frequency | 100.64                  |

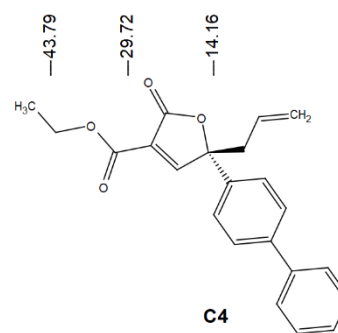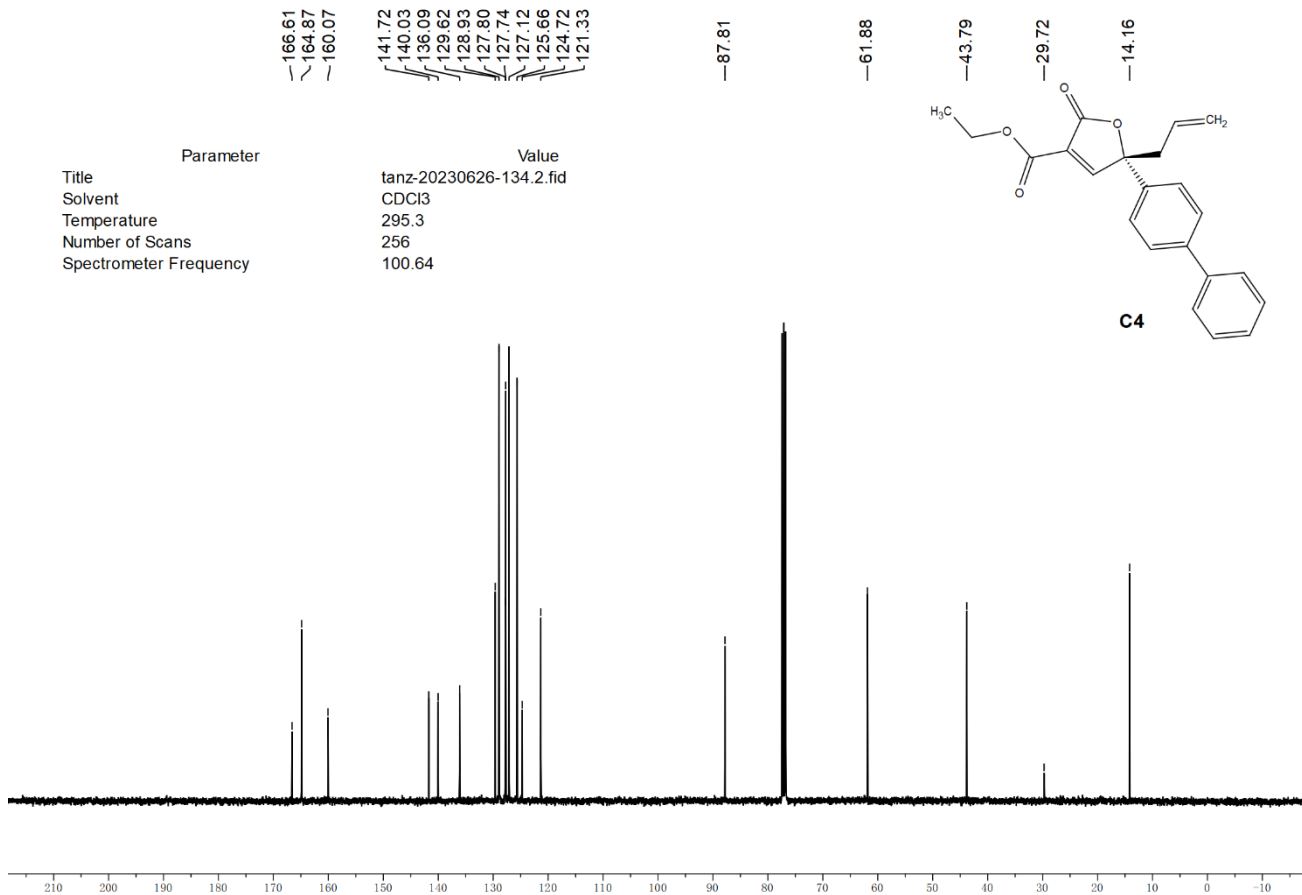

166.61  
164.87  
160.07  
141.72  
140.03  
136.09  
129.62  
128.93  
127.80  
127.74  
127.12  
125.66  
124.72  
121.33

87.81

61.88

43.79

29.72

14.16

8.31  
7.46  
7.46  
7.44  
7.44  
7.43  
7.28  
7.27  
7.27  
7.25  
7.25  
5.65  
5.63  
5.61  
5.61  
5.60  
5.59  
5.58  
5.57  
5.56  
5.54  
5.20  
5.18  
5.18  
5.17  
5.14  
5.13  
5.13  
4.37  
4.35  
4.33  
4.32  
2.94  
2.92  
2.92  
2.91  
2.90  
2.90  
2.88  
2.88  
2.86  
2.85  
2.85  
2.84  
2.84  
2.83  
2.82  
2.81  
2.80  
1.36  
1.36  
1.24

| Parameter              | Value                   |
|------------------------|-------------------------|
| Title                  | tanz-20230822-141.7.fid |
| Solvent                | CDCl3                   |
| Temperature            | 293.8                   |
| Number of Scans        | 16                      |
| Spectrometer Frequency | 400.18                  |

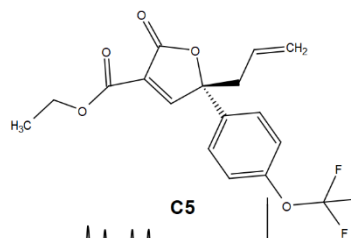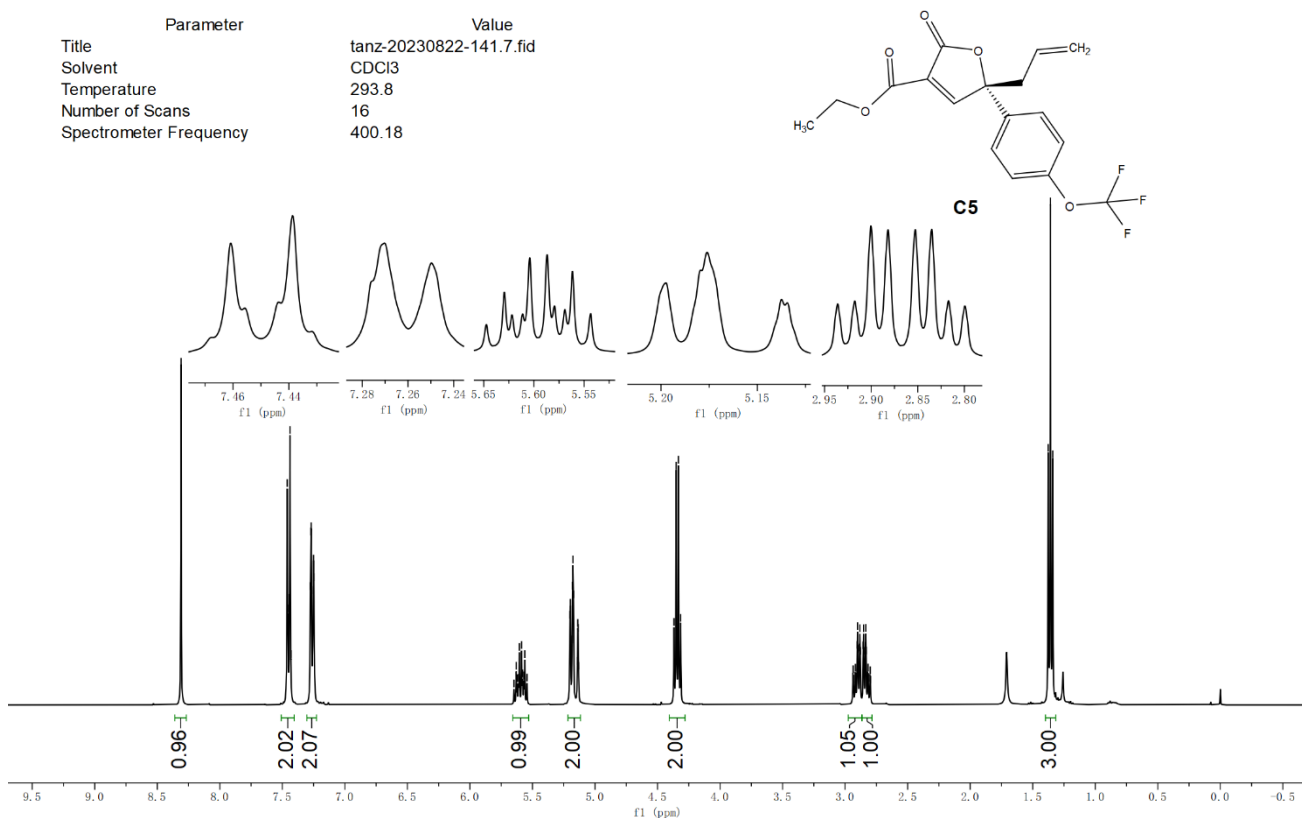

7.46  
7.44  
7.28  
7.26  
7.24  
5.65  
5.60  
5.55  
5.20  
5.15  
2.95  
2.90  
2.85  
2.80

0.96  
2.02  
2.07  
0.99  
2.00  
2.00  
1.05  
1.00  
3.00

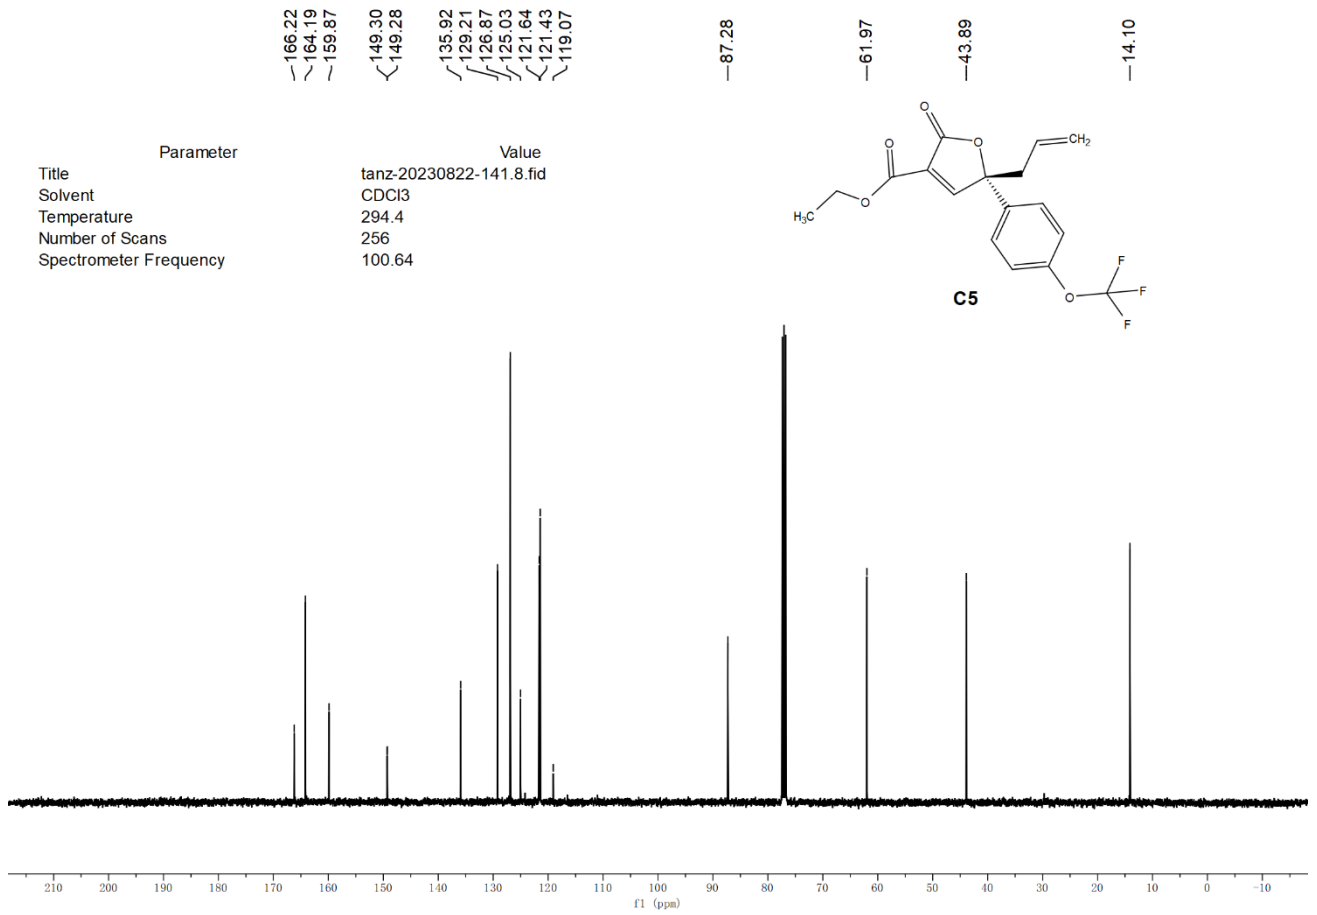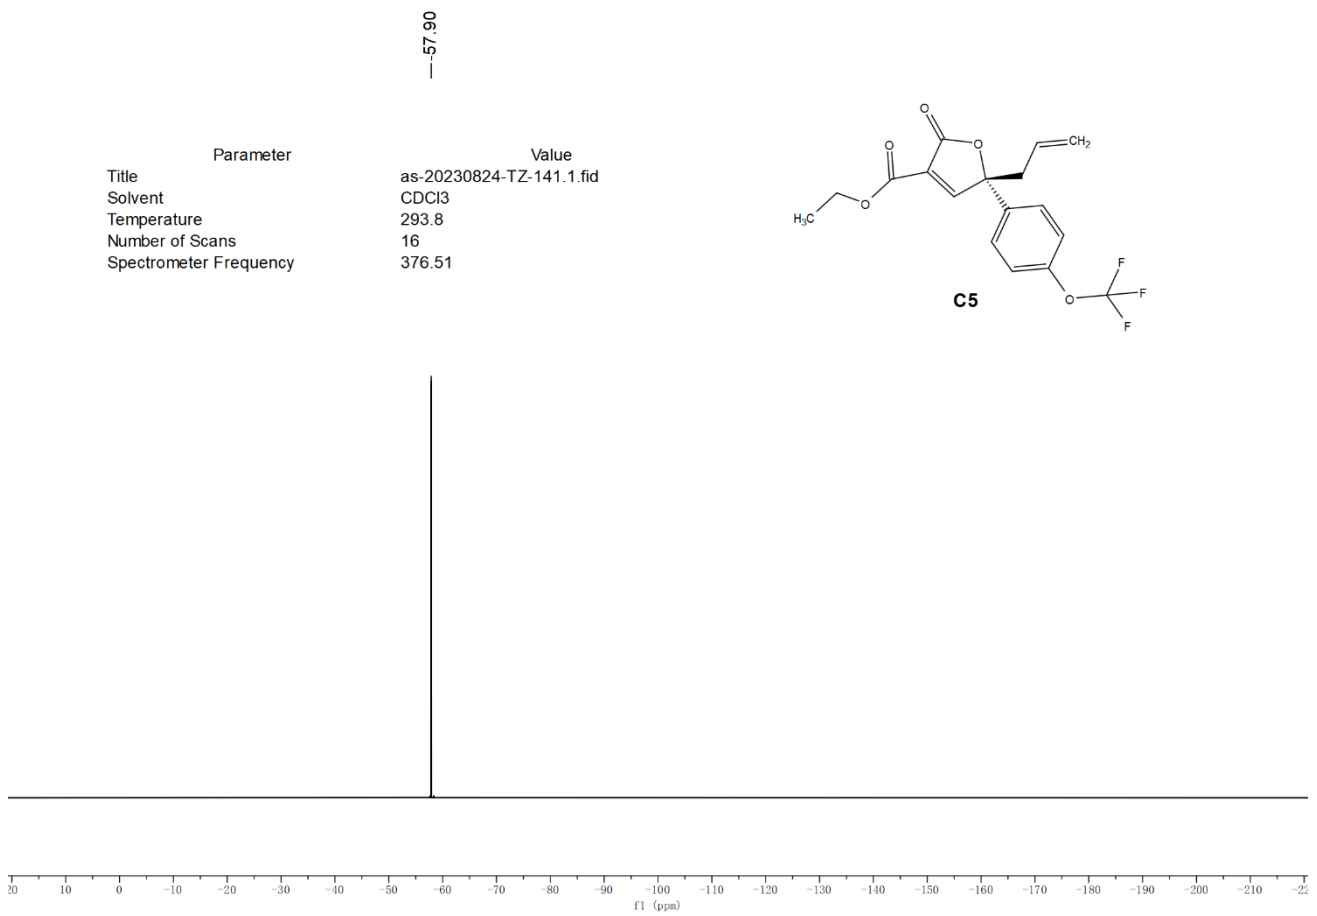

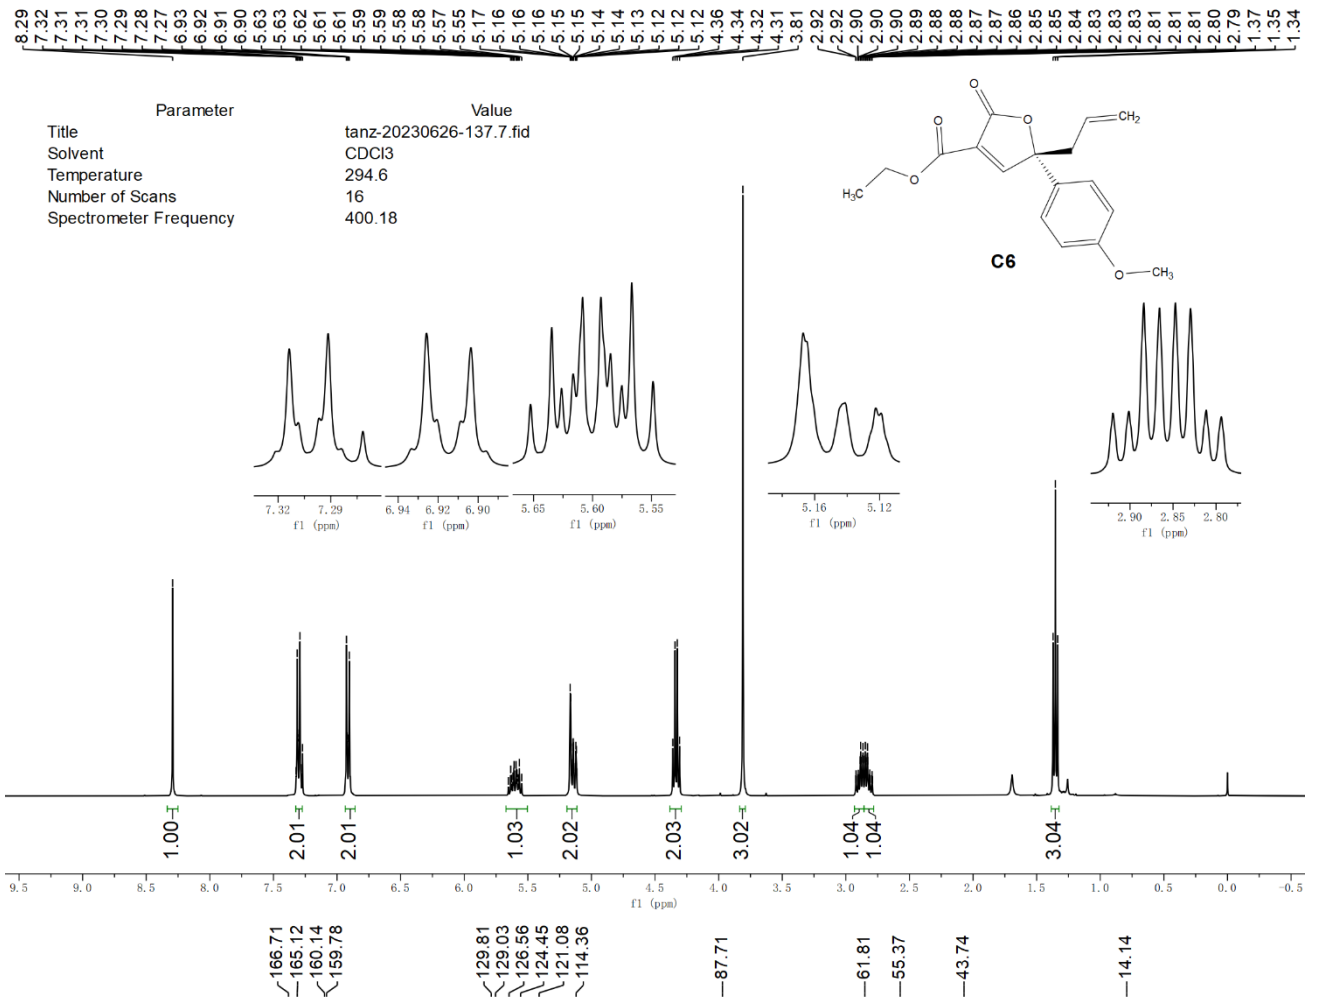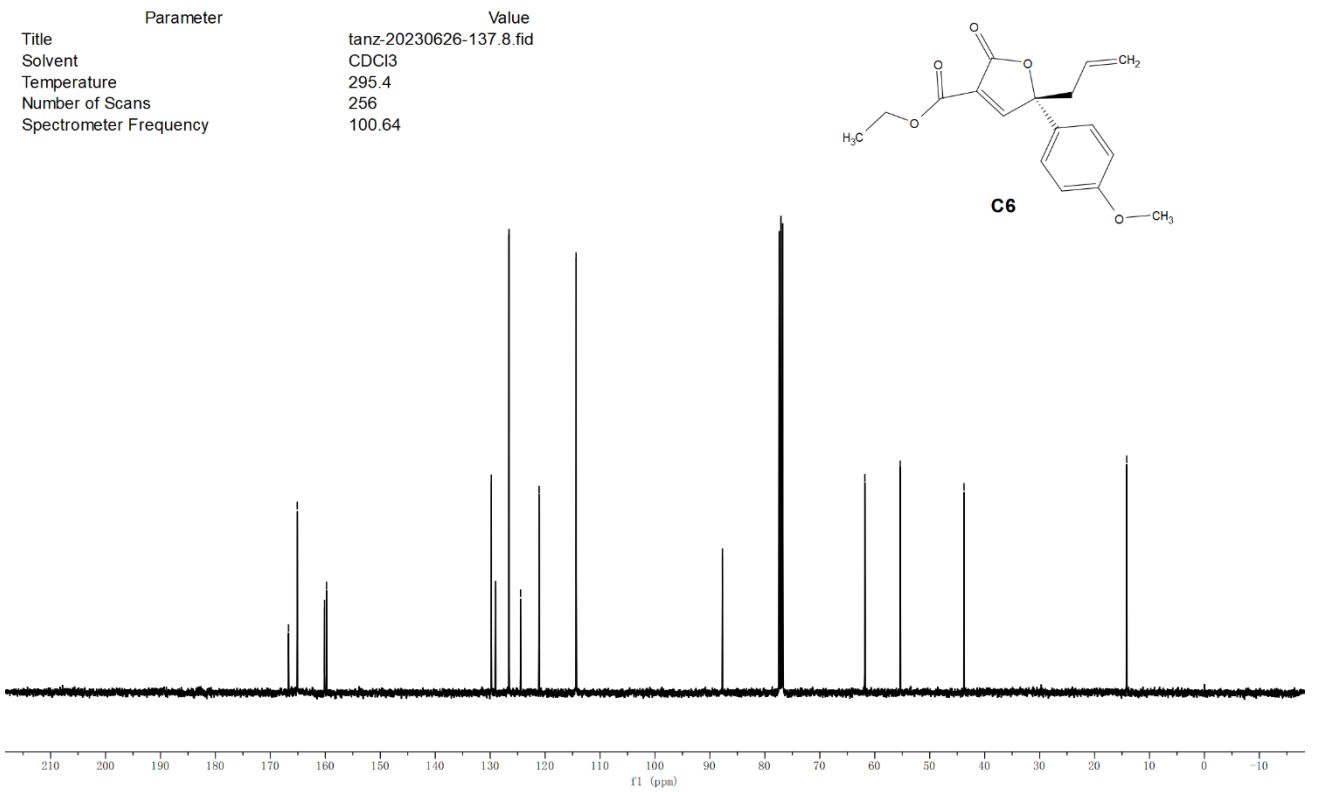

8.30  
7.40  
7.39  
7.38  
7.38  
7.37  
7.37  
7.36  
7.27  
7.12  
7.11  
7.10  
7.10  
7.08  
7.07  
5.62  
5.62  
5.61  
5.60  
5.58  
5.57  
5.57  
5.56  
5.54  
5.54  
5.19  
5.18  
5.18  
5.17  
5.17  
5.16  
5.16  
5.16  
5.13  
5.12  
5.12  
5.12  
4.37  
4.35  
4.33  
4.31  
2.92  
2.90  
2.90  
2.88  
2.88  
2.87  
2.86  
2.86  
2.84  
2.84  
2.84  
2.83  
2.82  
2.82  
2.80  
2.80  
2.79  
1.38  
1.36

| Parameter              | Value                    |
|------------------------|--------------------------|
| Title                  | as-20230622-TZ-130.1.fid |
| Solvent                | CDCl3                    |
| Temperature            | 294.7                    |
| Number of Scans        | 16                       |
| Spectrometer Frequency | 400.18                   |

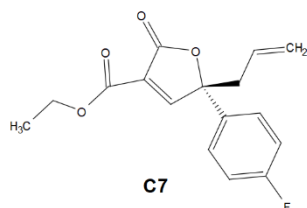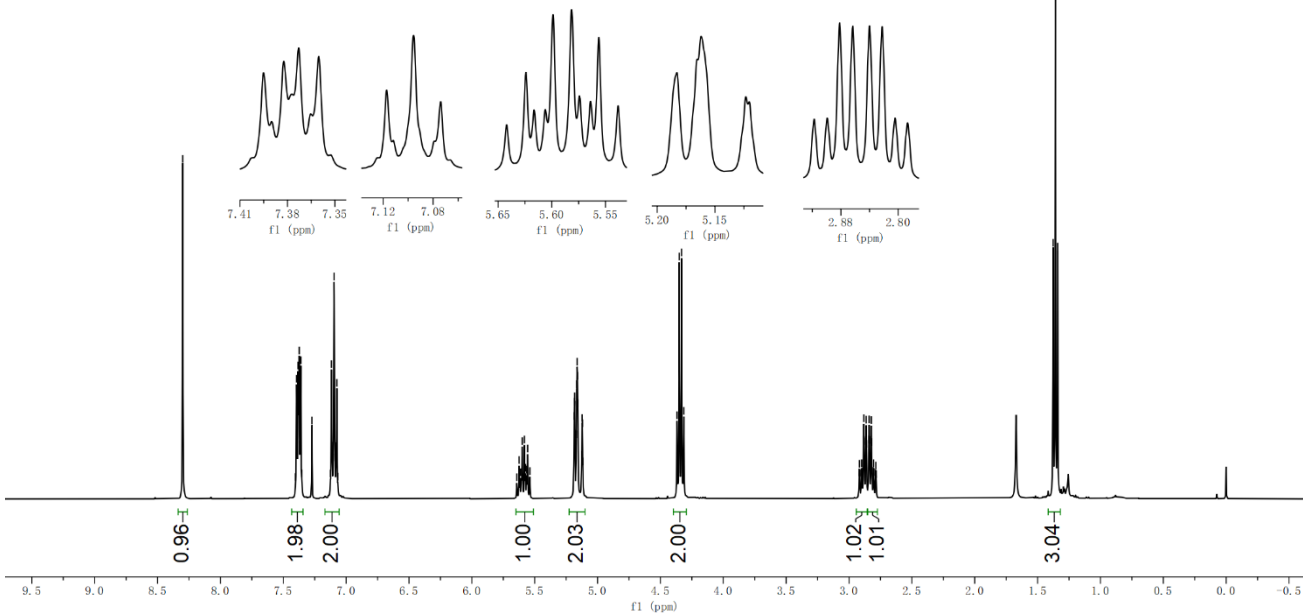

166.35  
164.51  
163.90  
161.43  
159.97  
133.08  
129.42  
127.18  
124.87  
121.45  
116.16  
115.94  
87.41  
61.93  
43.96  
14.12

| Parameter              | Value                    |
|------------------------|--------------------------|
| Title                  | as-20230622-TZ-130.2.fid |
| Solvent                | CDCl3                    |
| Temperature            | 295.2                    |
| Number of Scans        | 256                      |
| Spectrometer Frequency | 100.64                   |

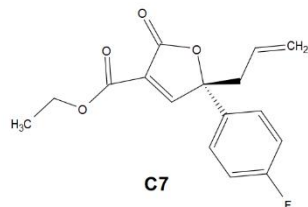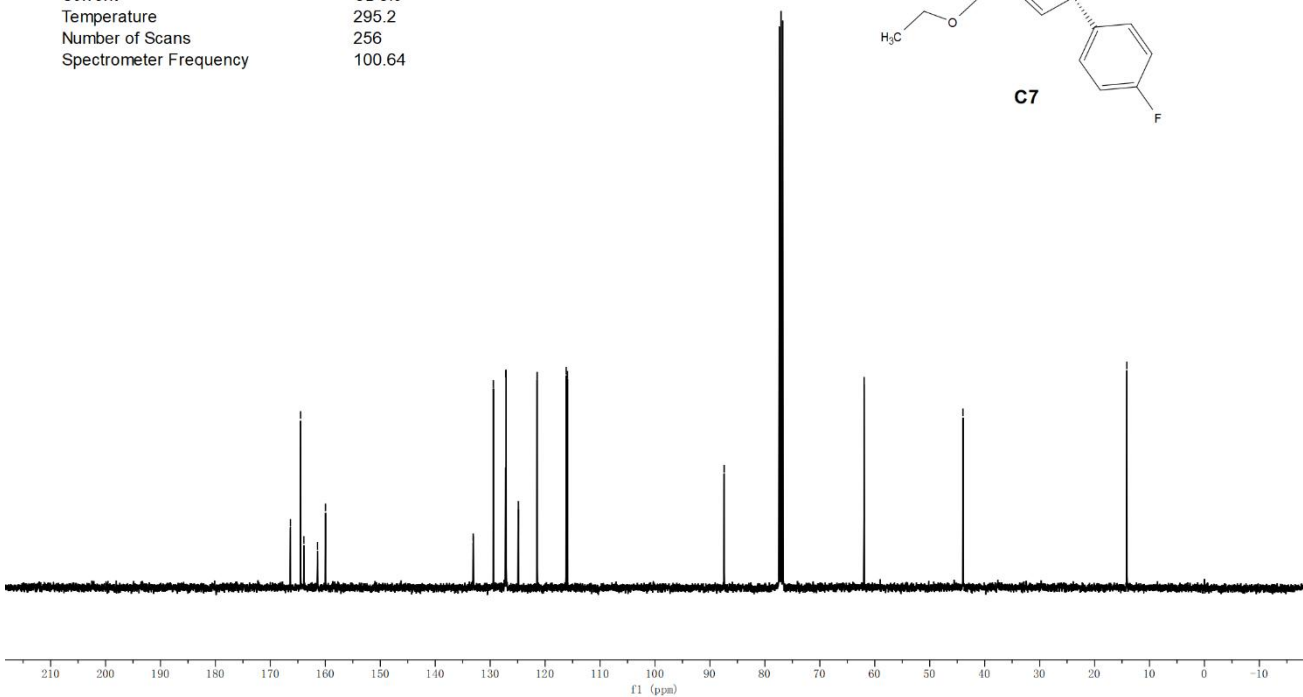



| Parameter              | Value                    |
|------------------------|--------------------------|
| Title                  | as-20230622-TZ-130.3.fid |
| Solvent                | CDCl <sub>3</sub>        |
| Temperature            | 295.0                    |
| Number of Scans        | 16                       |
| Spectrometer Frequency | 376.51                   |

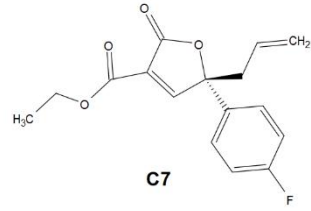

---112.58

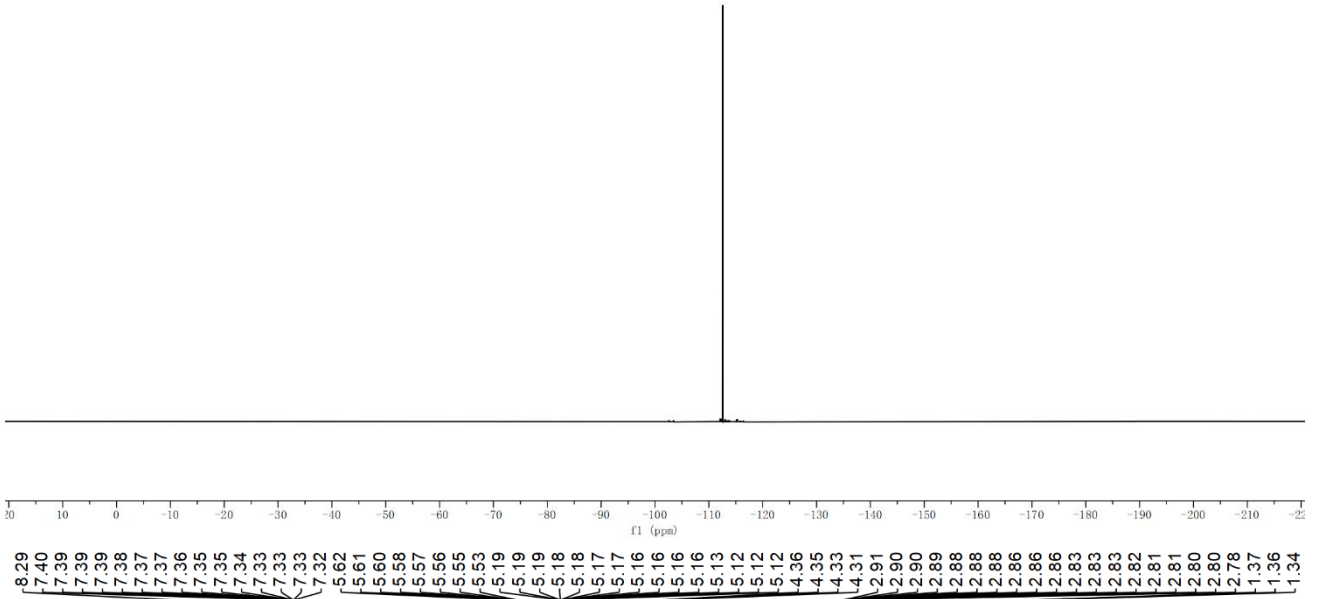

| Parameter              | Value                   |
|------------------------|-------------------------|
| Title                  | tanz-20230622-131.1.fid |
| Solvent                | CDCl <sub>3</sub>       |
| Temperature            | 294.6                   |
| Number of Scans        | 16                      |
| Spectrometer Frequency | 400.18                  |

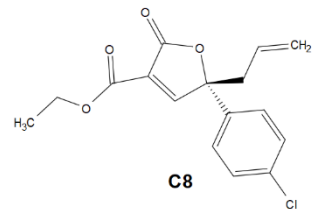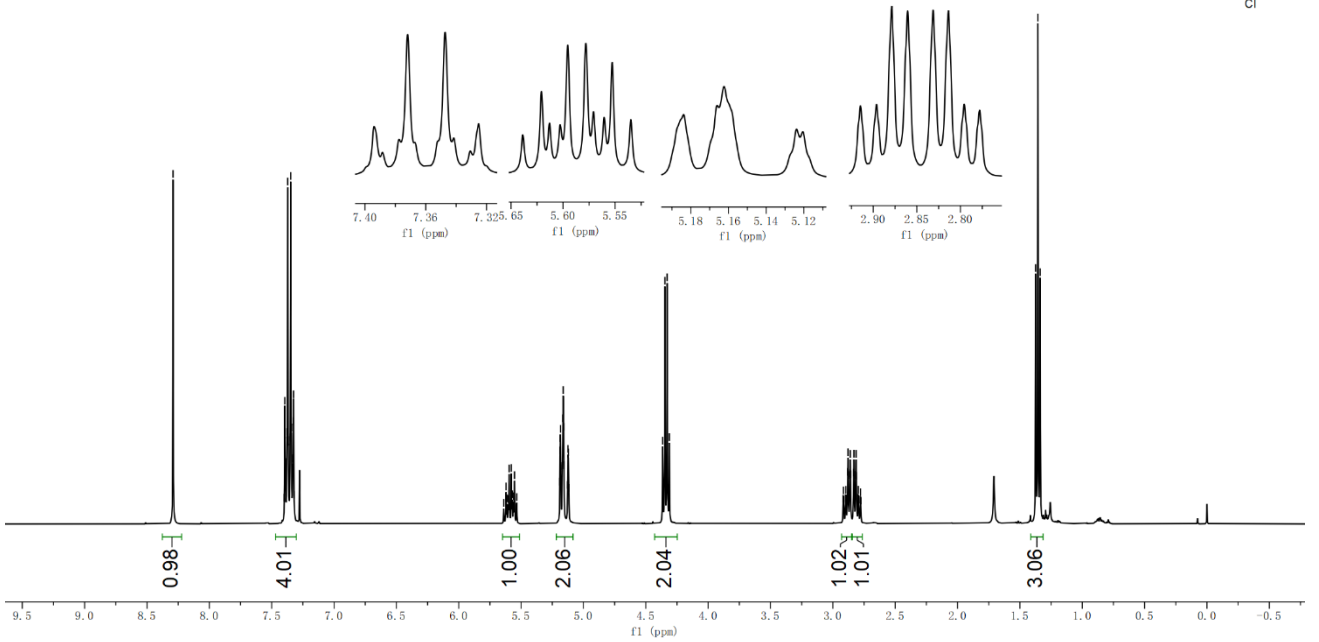

| Parameter              | Value                   |
|------------------------|-------------------------|
| Title                  | tanz-20230622-131.2.fid |
| Solvent                | CDCl3                   |
| Temperature            | 295.3                   |
| Number of Scans        | 256                     |
| Spectrometer Frequency | 100.64                  |

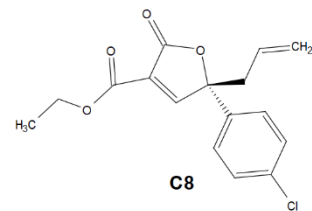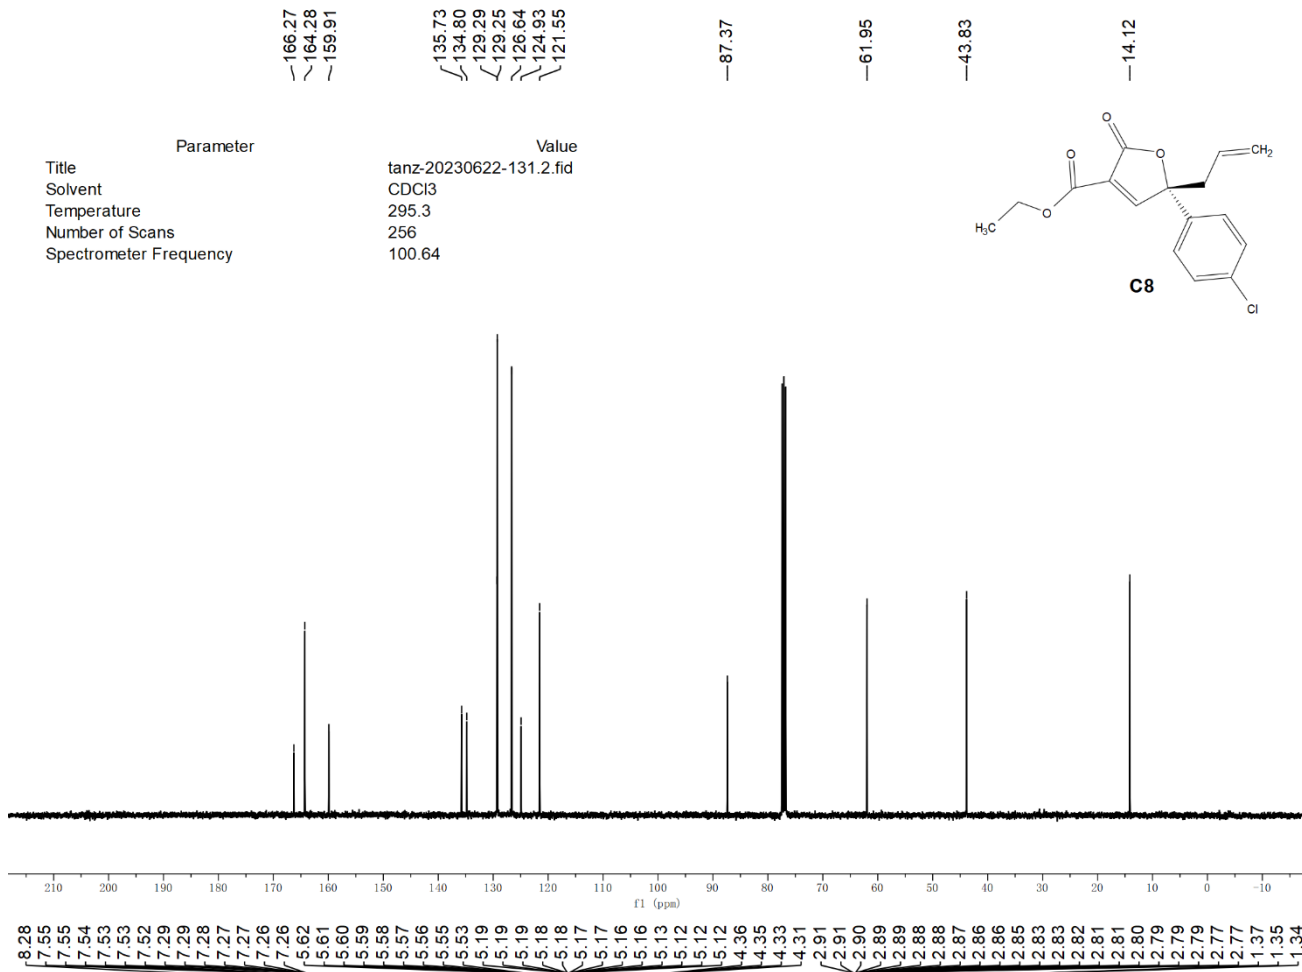

| Parameter              | Value                   |
|------------------------|-------------------------|
| Title                  | tanz-20230622-132.5.fid |
| Solvent                | CDCl3                   |
| Temperature            | 294.6                   |
| Number of Scans        | 16                      |
| Spectrometer Frequency | 400.18                  |

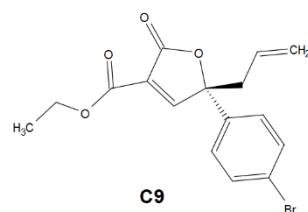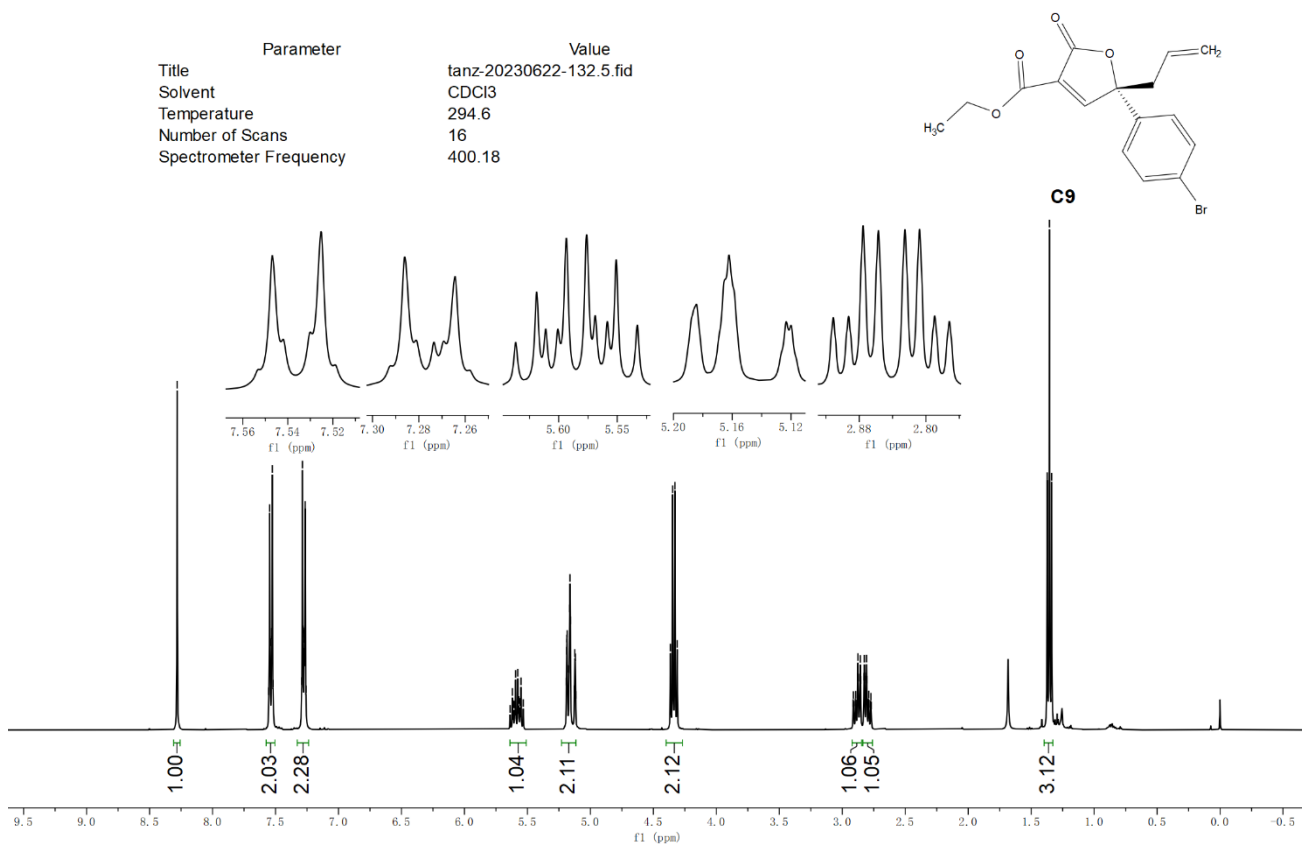

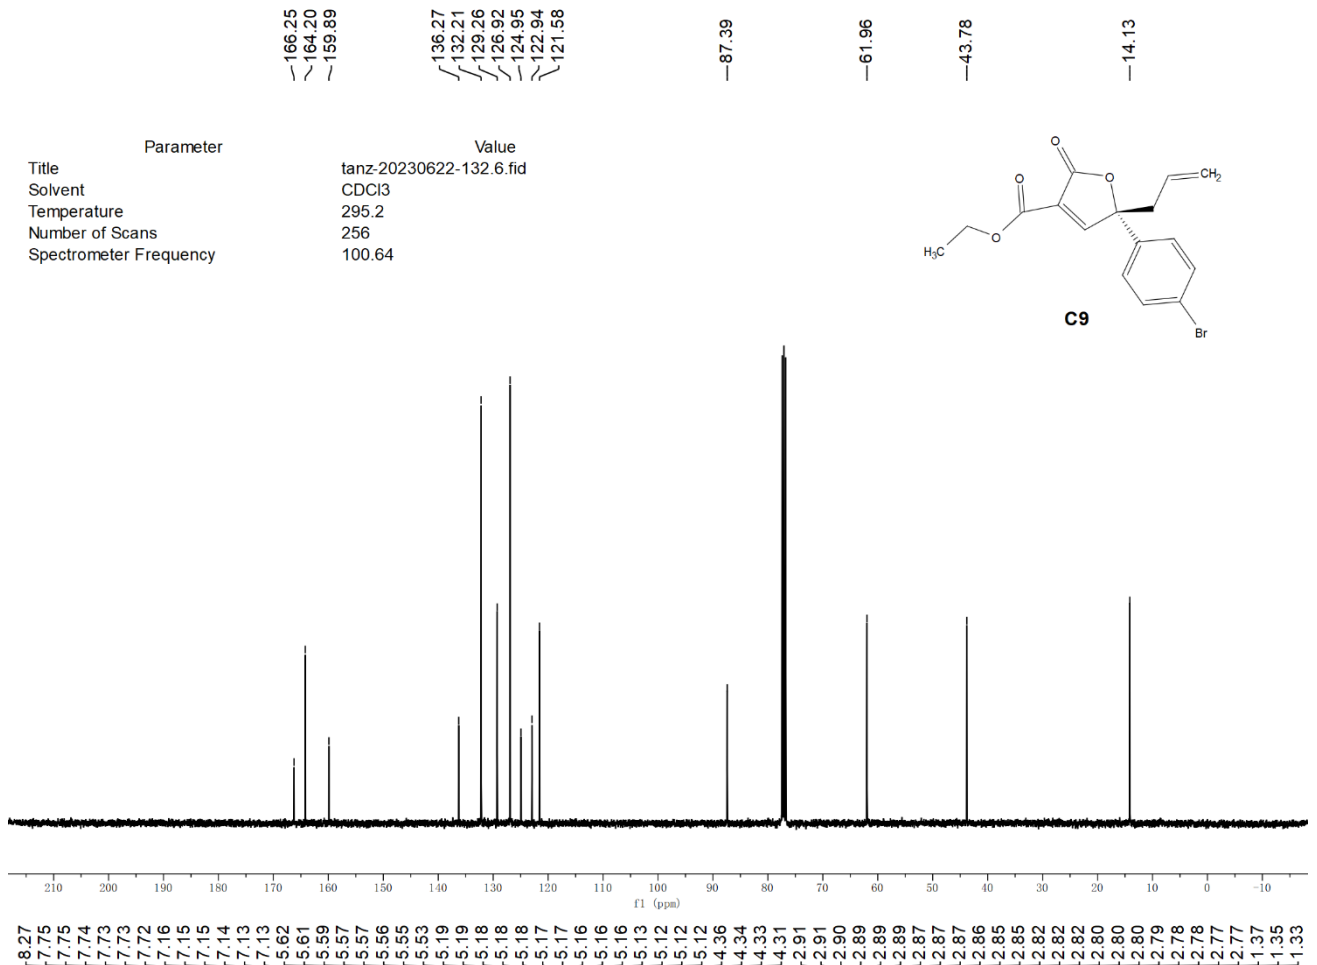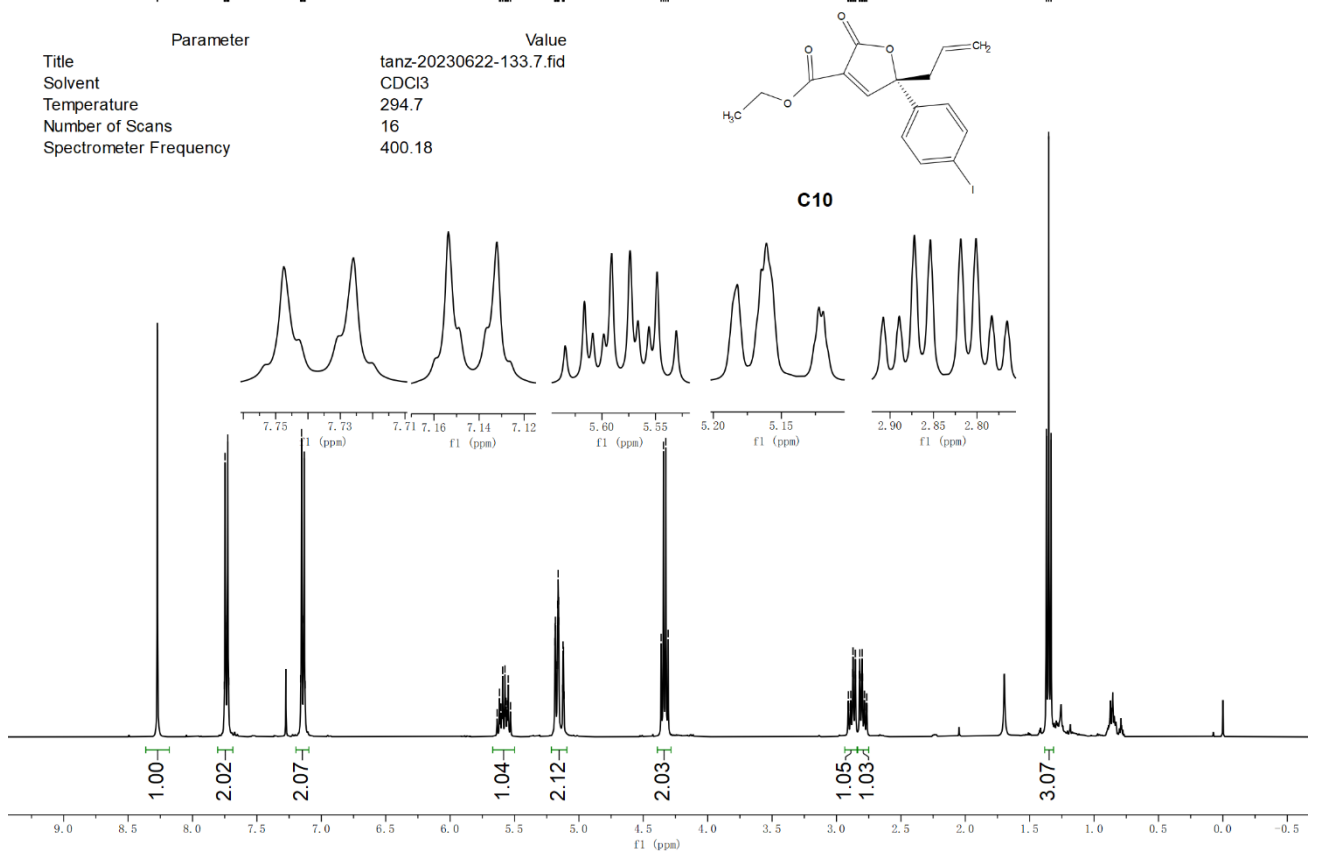

~166.25  
~164.20  
~159.88

~138.16  
~136.96  
~129.26  
~127.05  
~124.93  
~121.58

—94.60  
—87.45

—61.95

—43.72

—14.13

| Parameter              | Value                   |
|------------------------|-------------------------|
| Title                  | tanz-20230622-133.8.fid |
| Solvent                | CDCl3                   |
| Temperature            | 295.2                   |
| Number of Scans        | 256                     |
| Spectrometer Frequency | 100.64                  |

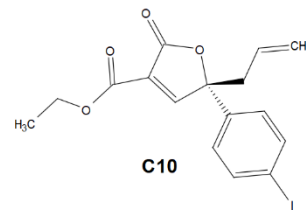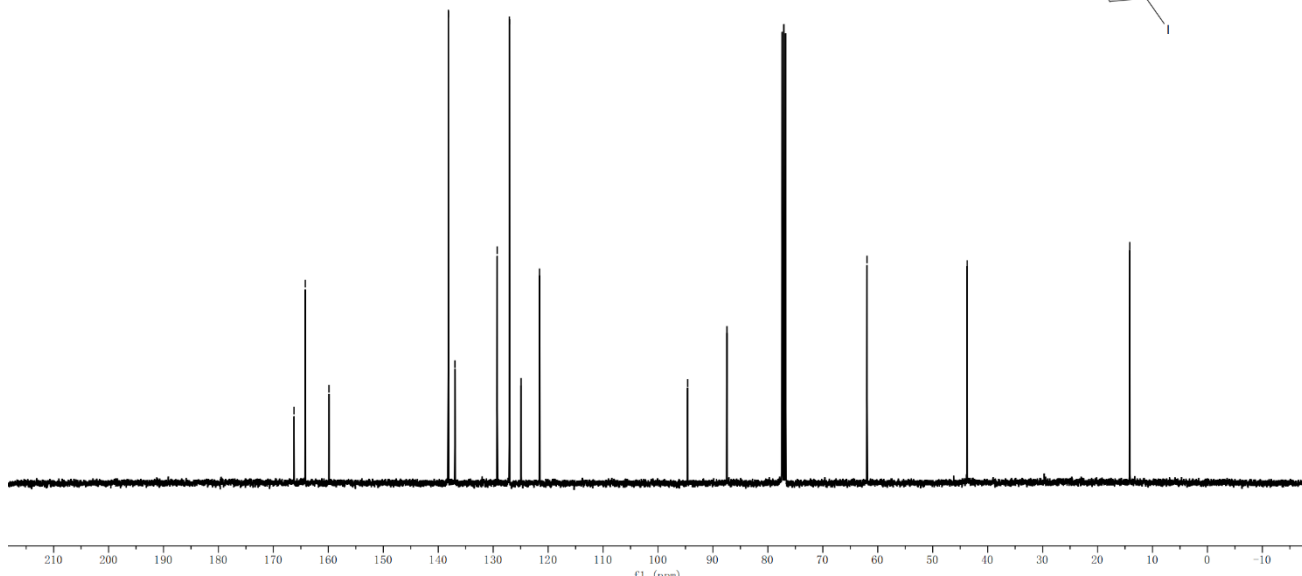

—8.32

7.69  
7.67  
7.56  
7.54

5.65  
5.63  
5.62  
5.61  
5.61  
5.59  
5.58  
5.57  
5.56  
5.54

5.20  
5.19  
5.18  
5.18  
5.18  
5.14  
5.14  
5.13  
5.13  
4.37  
4.35  
4.33  
4.32

2.95  
2.95  
2.94  
2.93  
2.93  
2.92  
2.92  
2.91  
2.90  
2.90  
2.89  
2.87  
2.86  
2.86  
2.85  
2.84  
2.84  
2.83  
2.83  
2.81  
2.81  
1.38  
1.36  
1.24

| Parameter              | Value                   |
|------------------------|-------------------------|
| Title                  | tanz-20230626-138.9.fid |
| Solvent                | CDCl3                   |
| Temperature            | 294.8                   |
| Number of Scans        | 16                      |
| Spectrometer Frequency | 400.18                  |

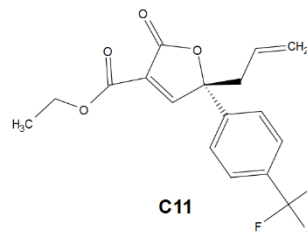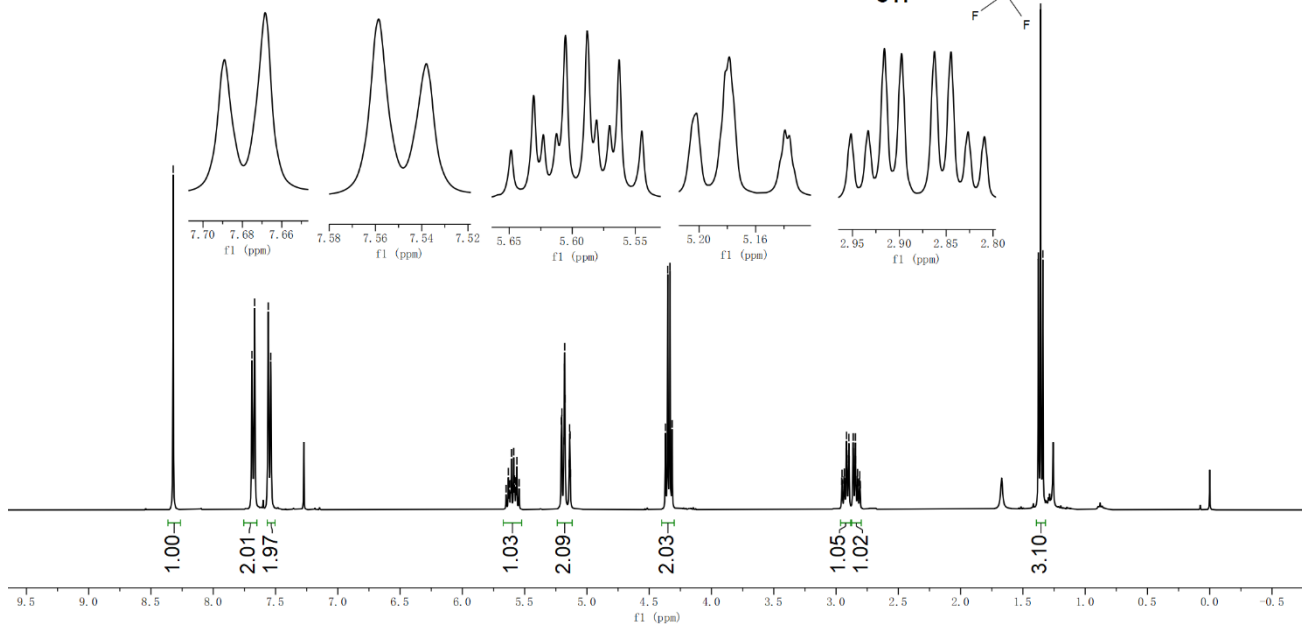

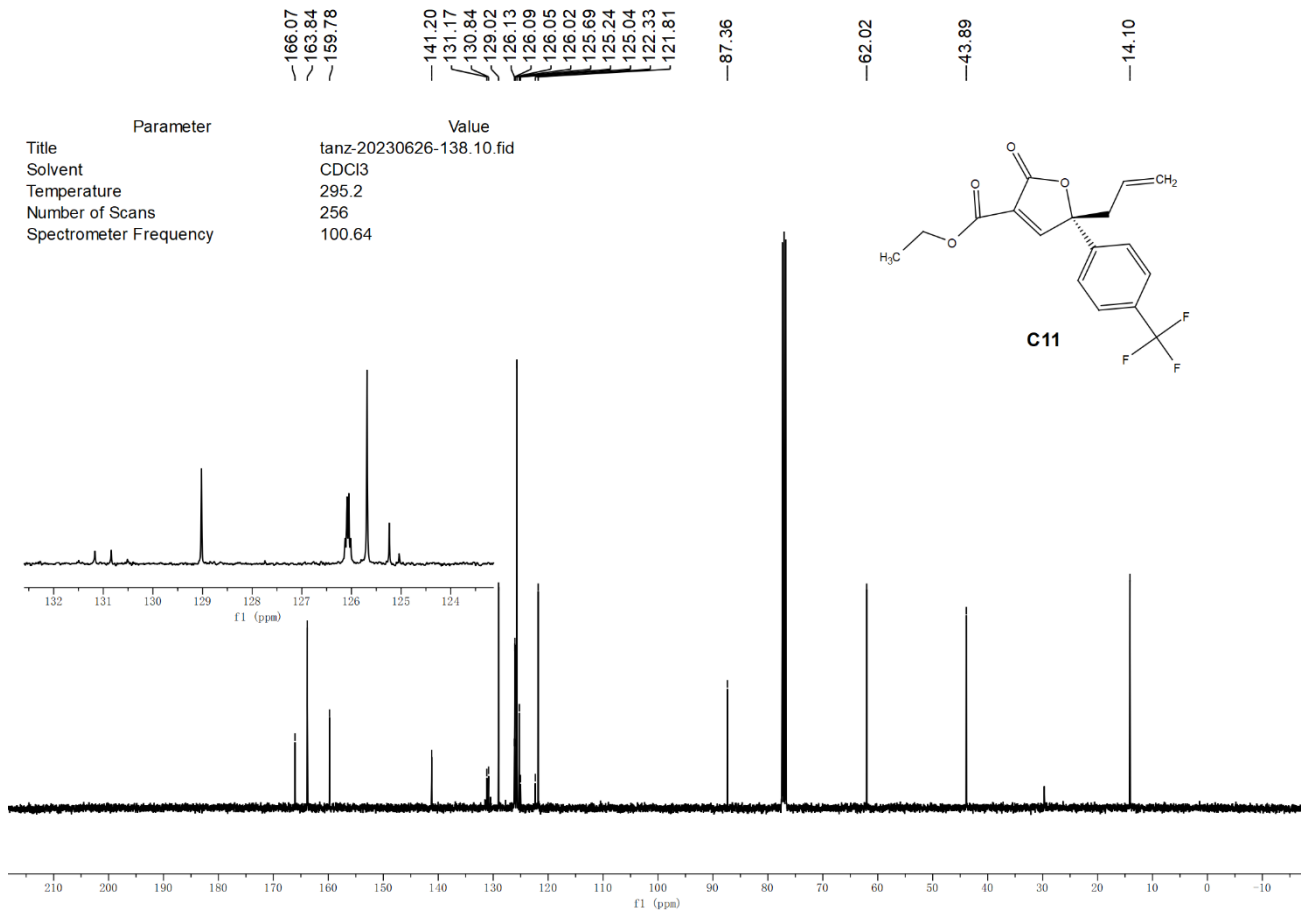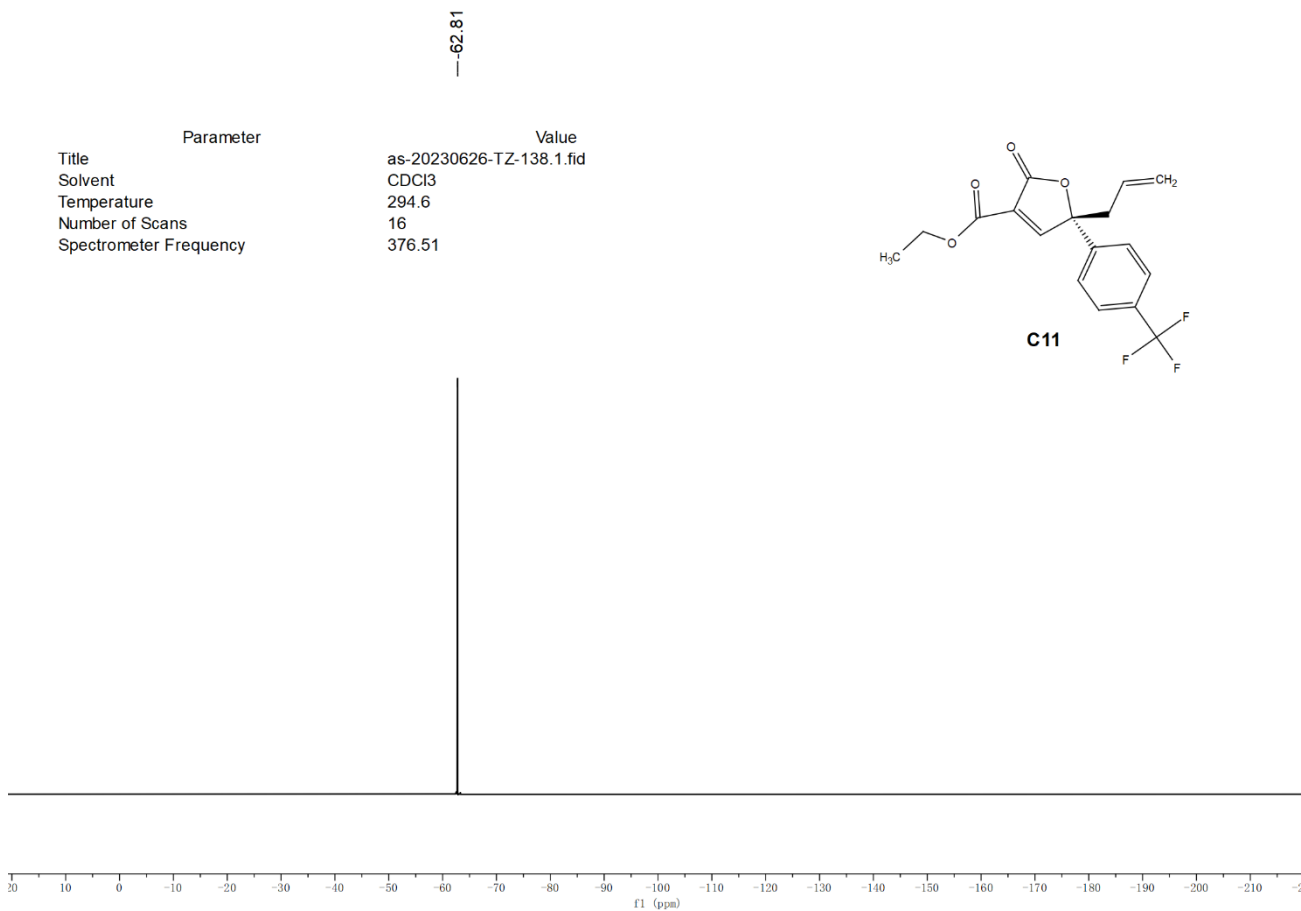

8.33  
8.09  
8.08  
8.08  
8.07  
8.06  
8.06  
7.50  
7.50  
7.48  
7.48  
7.47  
5.63  
5.61  
5.60  
5.58  
5.57  
5.56  
5.54  
5.19  
5.18  
5.17  
5.17  
5.16  
5.16  
5.12  
5.12  
5.12  
4.37  
4.35  
4.33  
4.31  
3.93  
2.95  
2.95  
2.95  
2.93  
2.93  
2.93  
2.92  
2.91  
2.91  
2.90  
2.89  
2.89  
2.86  
2.86  
2.86  
2.84  
2.84  
2.84  
2.83  
2.82  
2.82  
2.81  
2.81  
1.38  
1.36

| Parameter              | Value                   |
|------------------------|-------------------------|
| Title                  | tanz-20230626-136.5.fid |
| Solvent                | CDCl3                   |
| Temperature            | 294.7                   |
| Number of Scans        | 16                      |
| Spectrometer Frequency | 400.18                  |

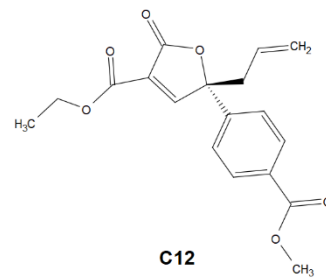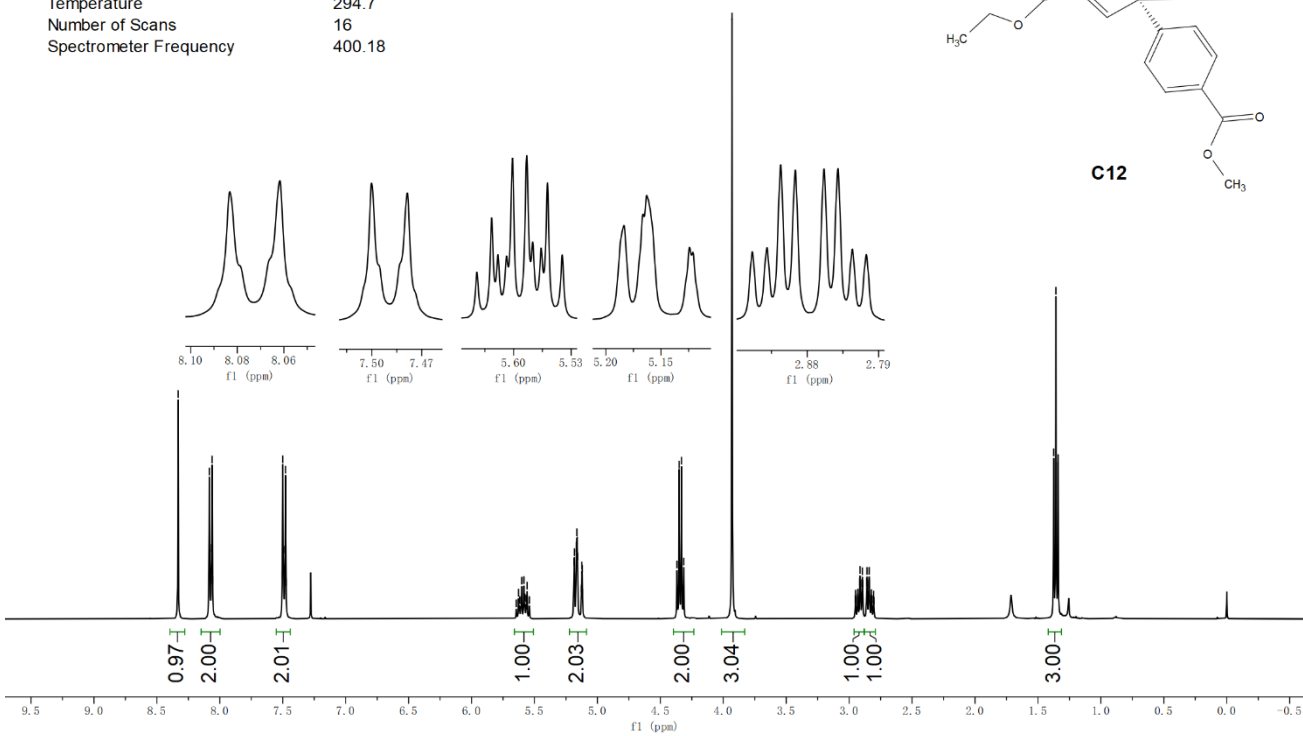

166.28  
166.19  
164.04  
159.86  
141.97  
130.52  
130.29  
129.16  
125.27  
125.12  
121.65  
87.62  
61.98  
52.36  
43.89  
14.12

| Parameter              | Value                   |
|------------------------|-------------------------|
| Title                  | tanz-20230626-136.6.fid |
| Solvent                | CDCl3                   |
| Temperature            | 295.3                   |
| Number of Scans        | 256                     |
| Spectrometer Frequency | 100.64                  |

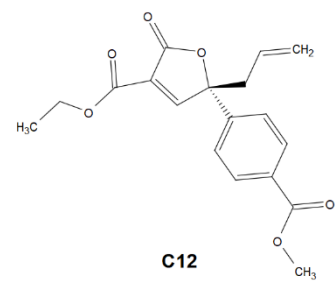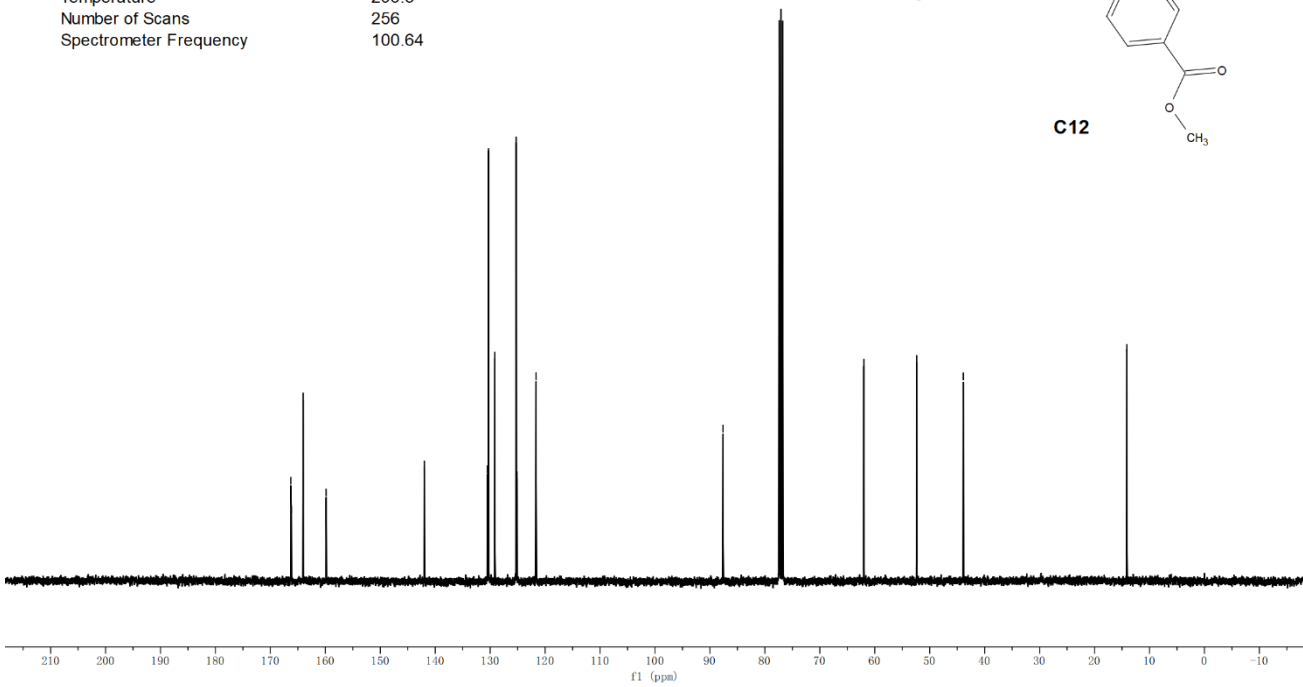

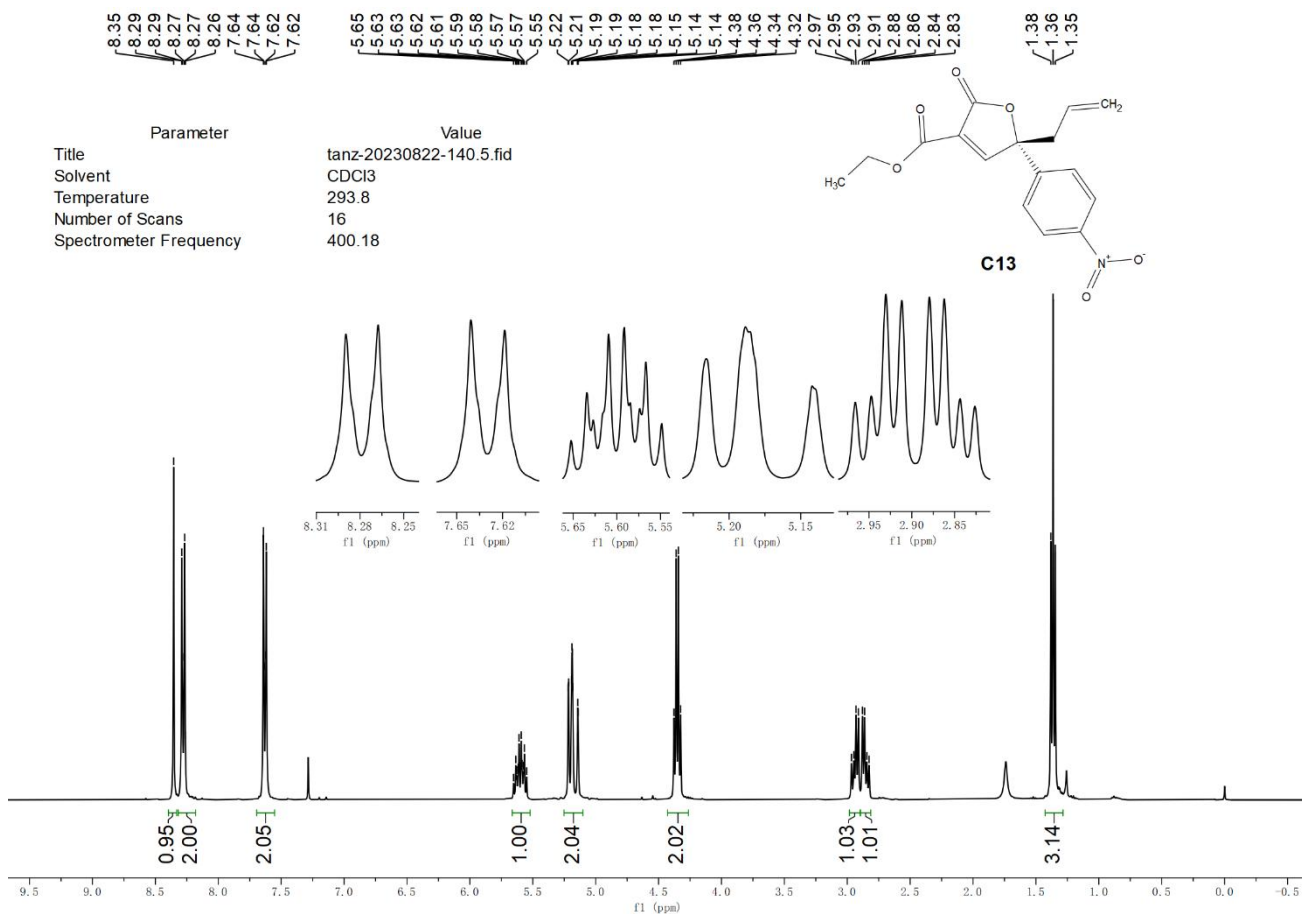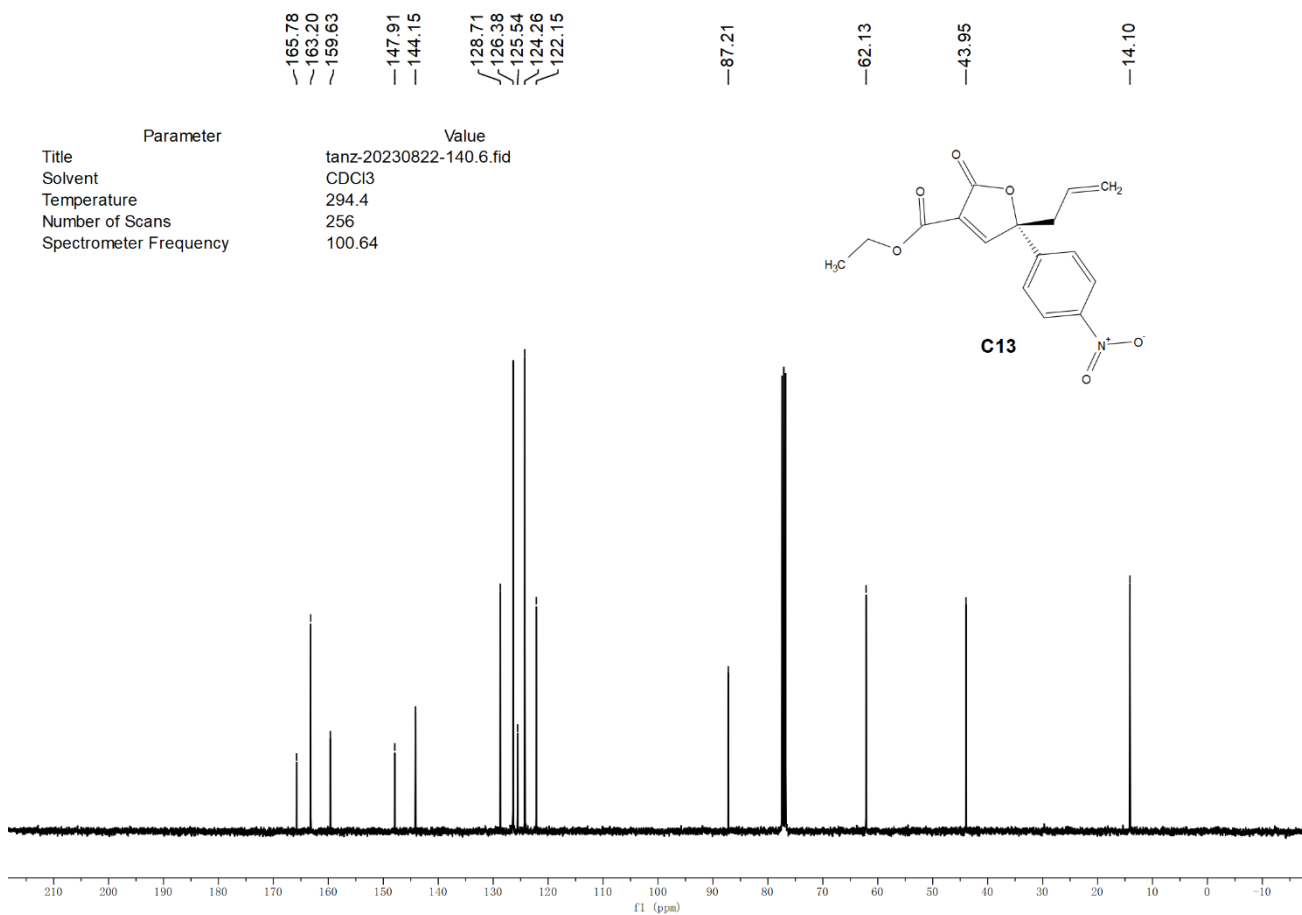

8.29 7.41 7.41 7.41 7.40 7.35 7.34 7.34 7.34 7.33 7.32 7.32 7.30 7.29 7.29 7.28 7.28 7.28 7.27 5.63 5.60 5.58 5.58 5.56 5.56 5.20 5.20 5.20 5.19 5.19 5.18 5.18 5.18 5.17 5.17 5.17 5.14 5.14 5.13 5.13 4.37 4.35 4.33 4.33 4.31 4.31 2.91 2.91 2.90 2.89 2.89 2.88 2.88 2.87 2.84 2.84 2.84 2.82 2.82 2.82 2.80 2.78 1.38 1.36 1.34

| Parameter              | Value                    |
|------------------------|--------------------------|
| Title                  | tanz-20230822-143.11.fid |
| Solvent                | CDCl3                    |
| Temperature            | 293.9                    |
| Number of Scans        | 16                       |
| Spectrometer Frequency | 400.18                   |

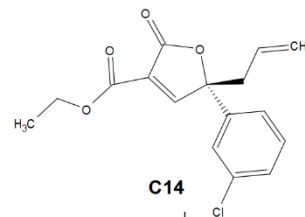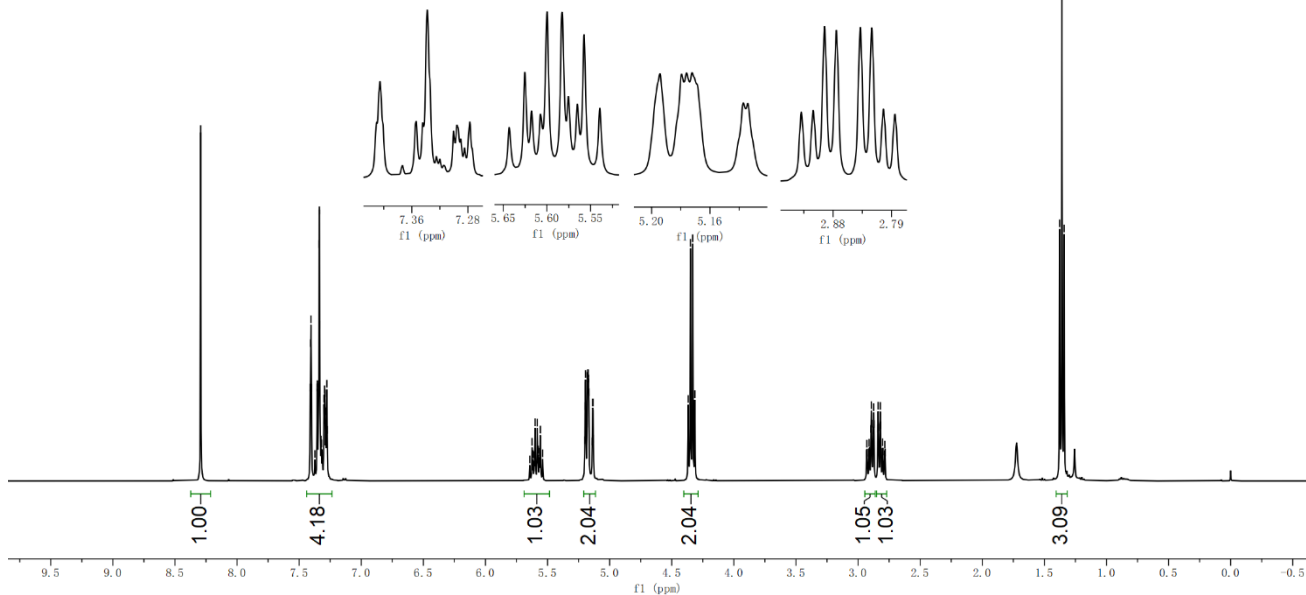

166.21 164.10 159.86 139.20 135.09 130.36 129.18 128.95 125.50 125.03 123.37 121.64 87.23 61.97 43.80 14.12

| Parameter              | Value                    |
|------------------------|--------------------------|
| Title                  | tanz-20230822-143.12.fid |
| Solvent                | CDCl3                    |
| Temperature            | 294.3                    |
| Number of Scans        | 256                      |
| Spectrometer Frequency | 100.64                   |

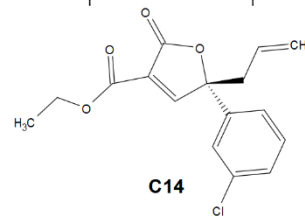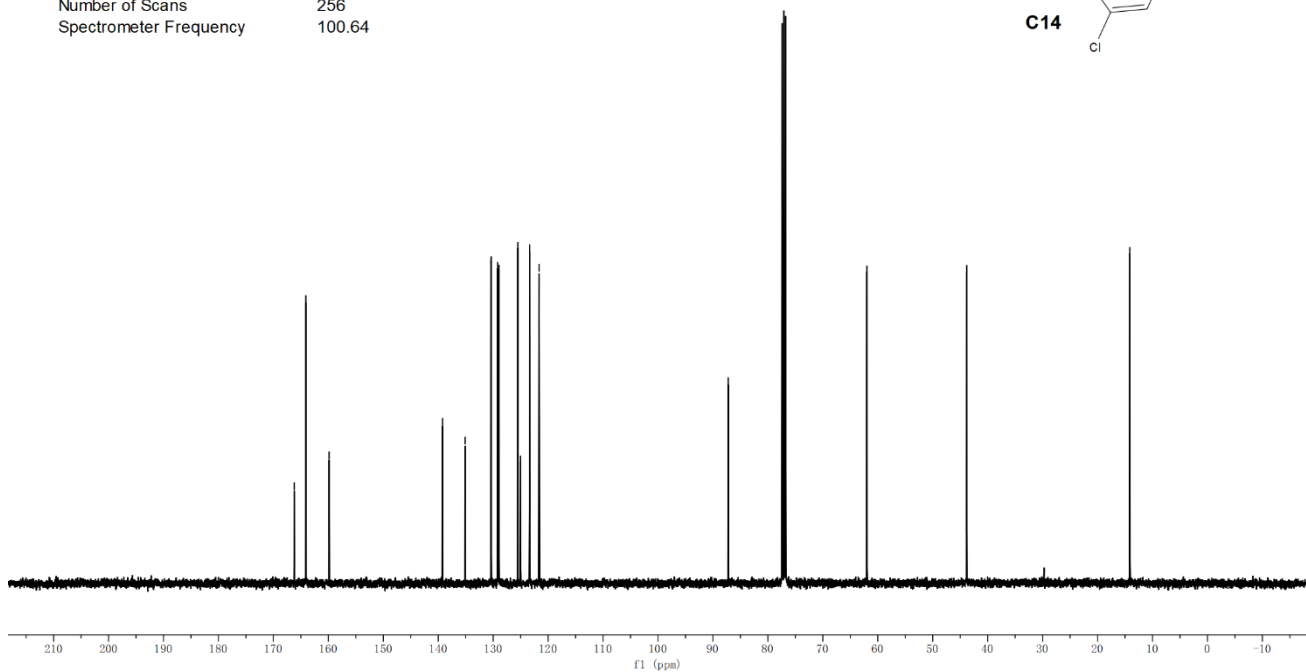



8.30  
7.34  
7.32  
7.30  
7.27  
6.96  
6.96  
6.96  
6.95  
6.95  
6.94  
6.94  
6.89  
6.89  
6.88  
6.87  
6.87  
6.86  
5.64  
5.62  
5.61  
5.60  
5.59  
5.59  
5.57  
5.17  
5.15  
5.15  
5.15  
5.15  
5.14  
5.14  
5.13  
5.12  
4.36  
4.34  
4.32  
4.31  
3.82  
2.94  
2.92  
2.91  
2.90  
2.89  
2.89  
2.88  
2.84  
2.84  
2.84  
2.83  
2.82  
2.82  
2.80  
2.79  
1.37  
1.35  
1.33

| Parameter              | Value                   |
|------------------------|-------------------------|
| Title                  | tanz-20230822-142.9.fid |
| Solvent                | CDCl3                   |
| Temperature            | 293.9                   |
| Number of Scans        | 16                      |
| Spectrometer Frequency | 400.18                  |

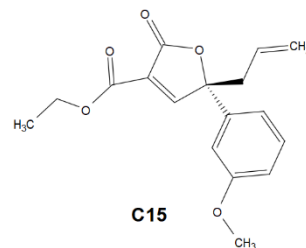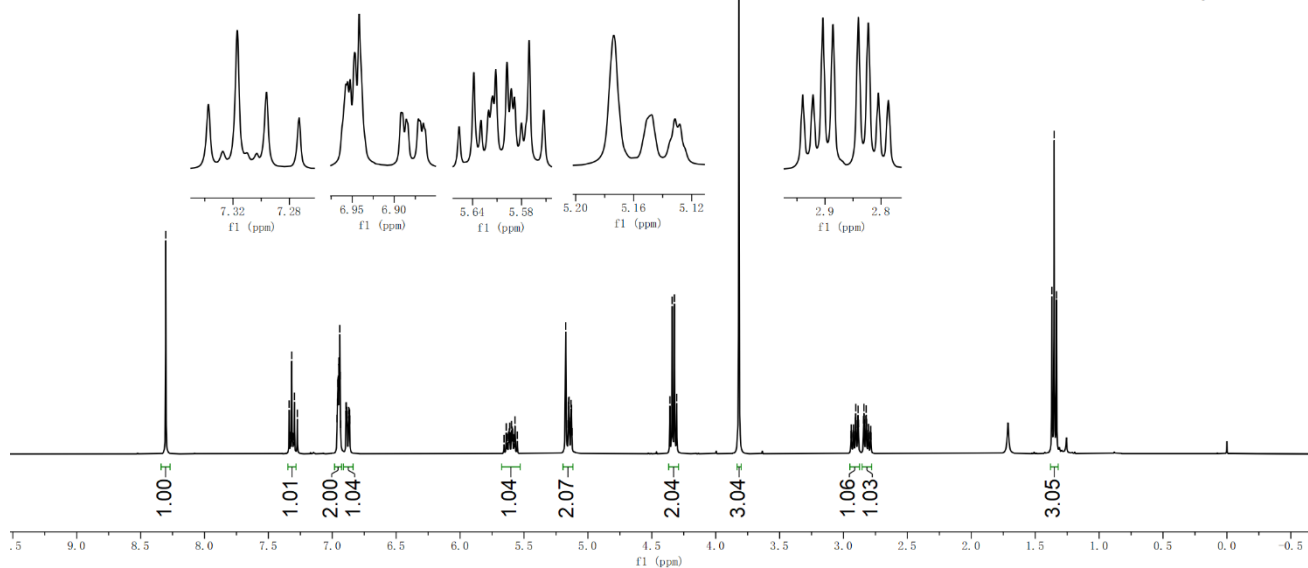

166.58  
164.86  
160.06  
160.04  
138.73  
130.10  
129.61  
124.58  
121.21  
117.36  
113.98  
111.05  
87.78  
61.85  
55.42  
43.88  
14.14

| Parameter              | Value                    |
|------------------------|--------------------------|
| Title                  | tanz-20230822-142.10.fid |
| Solvent                | CDCl3                    |
| Temperature            | 294.4                    |
| Number of Scans        | 256                      |
| Spectrometer Frequency | 100.64                   |

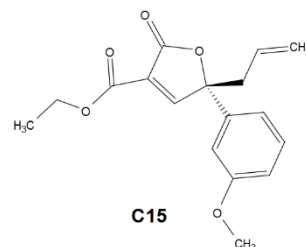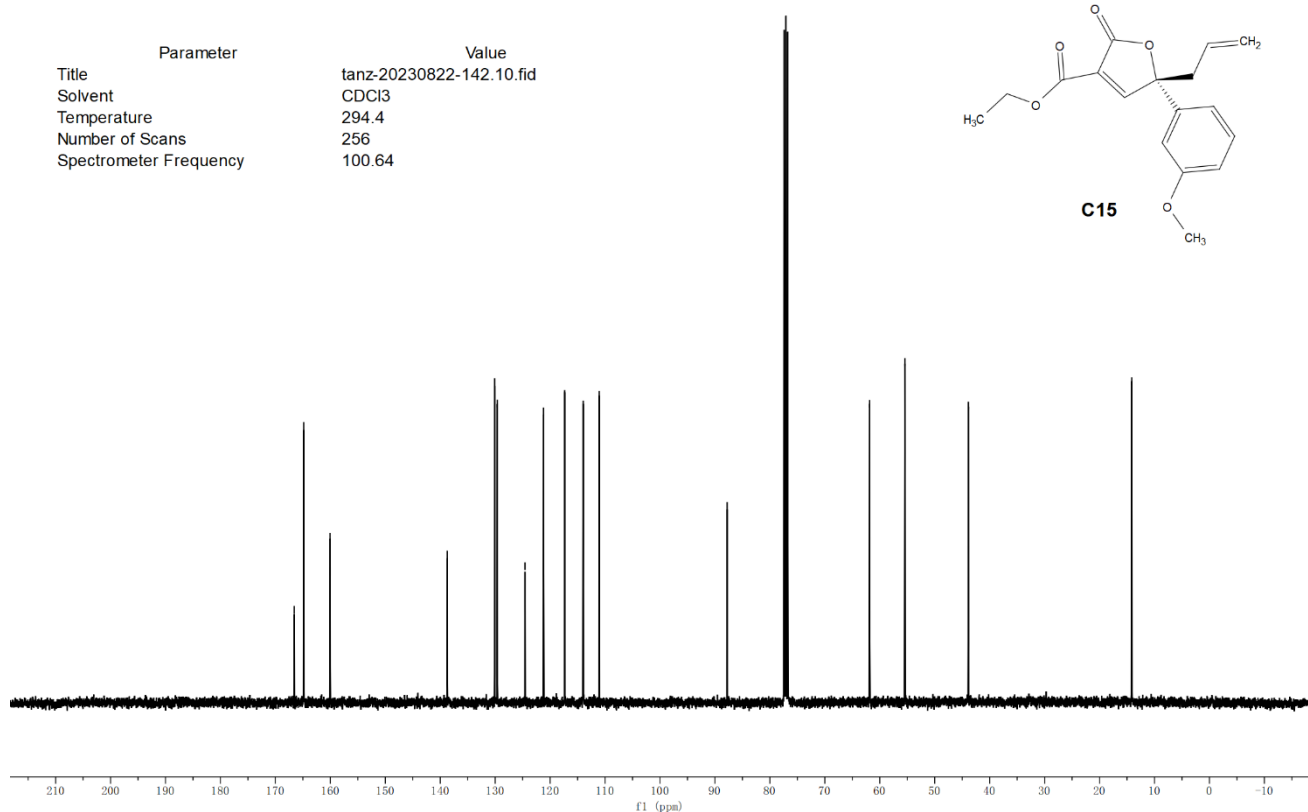

8.39  
8.29  
8.28  
8.28  
8.25  
8.25  
8.24  
8.23  
8.23  
8.22  
7.81  
7.81  
7.80  
7.79  
7.79  
7.78  
7.66  
7.64  
7.62  
5.65  
5.62  
5.60  
5.59  
5.58  
5.56  
5.23  
5.23  
5.22  
5.20  
5.20  
5.19  
5.19  
5.16  
5.15  
5.15  
5.15  
4.38  
4.36  
4.35  
4.33  
4.33  
2.96  
2.95  
2.95  
2.94  
2.93  
2.93  
2.92  
2.91  
2.90  
2.90  
2.89  
2.89  
2.88  
2.87  
2.87  
2.85  
1.37  
1.37  
1.35

| Parameter              | Value                   |
|------------------------|-------------------------|
| Title                  | tanz-20230902-154.1.fid |
| Solvent                | CDCl3                   |
| Temperature            | 293.9                   |
| Number of Scans        | 16                      |
| Spectrometer Frequency | 400.18                  |

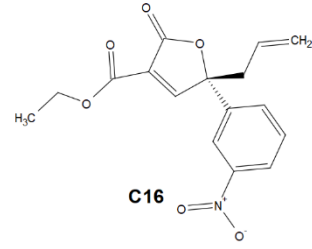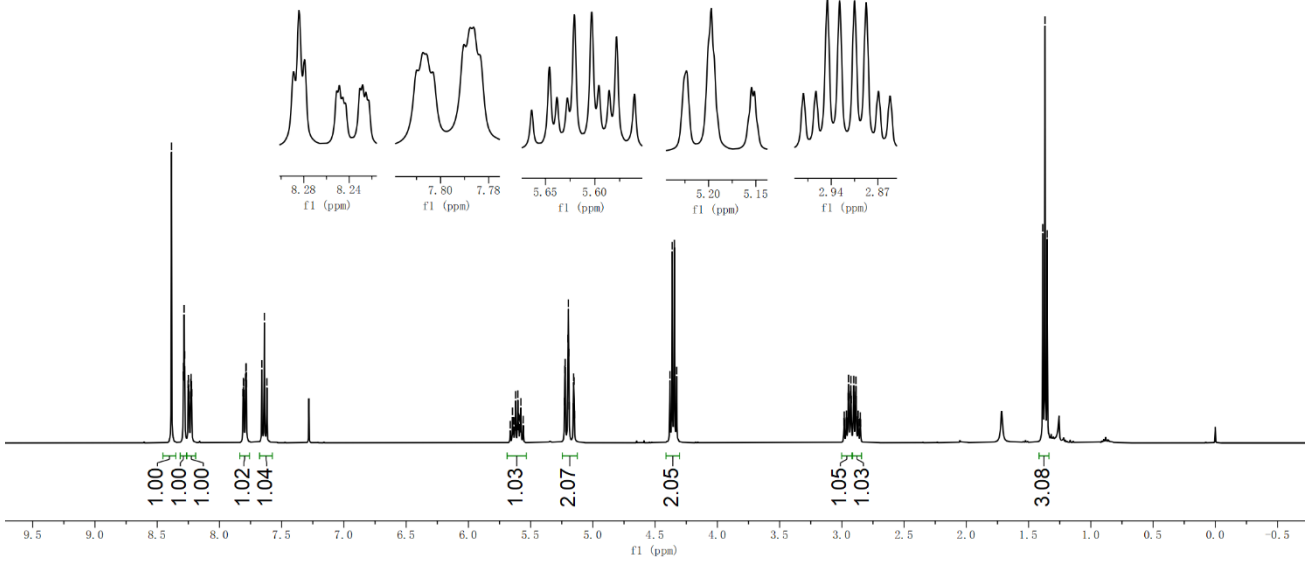

165.82  
163.24  
159.65  
148.45  
139.49  
131.30  
130.33  
128.76  
125.57  
123.74  
122.19  
120.50  
86.96  
62.12  
43.96  
14.11

| Parameter              | Value                   |
|------------------------|-------------------------|
| Title                  | tanz-20230902-154.2.fid |
| Solvent                | CDCl3                   |
| Temperature            | 294.2                   |
| Number of Scans        | 256                     |
| Spectrometer Frequency | 100.64                  |

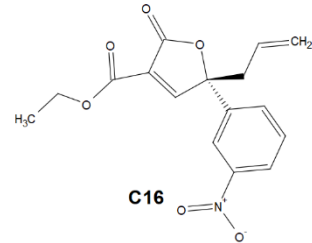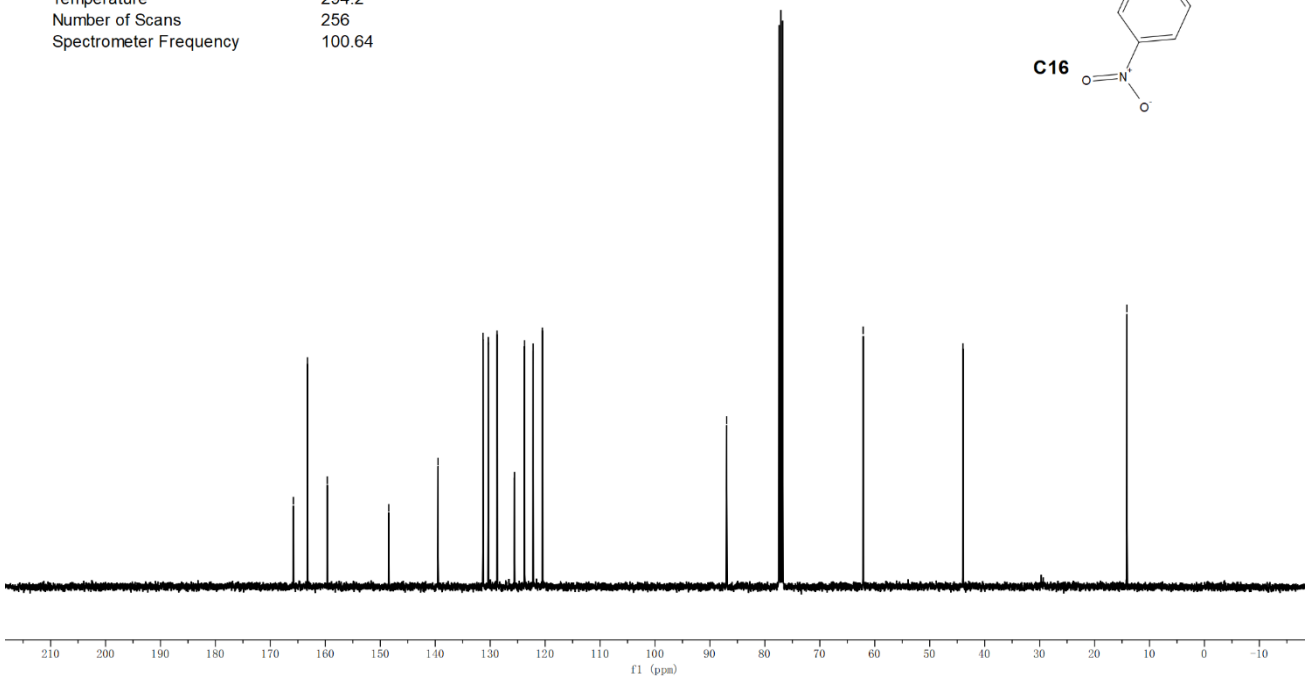

8.57  
7.34  
7.33  
7.32  
7.32  
7.27  
7.27  
7.26  
7.25  
7.25  
7.24  
7.23  
7.22  
7.21  
7.21  
7.20  
7.20  
7.19  
7.18  
7.17  
5.60  
5.58  
5.58  
5.57  
5.57  
5.56  
5.56  
5.55  
5.53  
5.51  
5.17  
5.16  
5.16  
5.14  
5.14  
5.14  
5.13  
5.13  
5.12  
5.12  
4.36  
4.36  
4.34  
4.32  
2.97  
2.96  
2.95  
2.95  
2.94  
2.93  
2.93  
2.93  
2.92  
2.91  
2.91  
2.89  
2.58  
1.36  
1.35

| Parameter              | Value                   |
|------------------------|-------------------------|
| Title                  | tanz-20230824-144.1.fid |
| Solvent                | CDCl3                   |
| Temperature            | 293.7                   |
| Number of Scans        | 16                      |
| Spectrometer Frequency | 400.18                  |

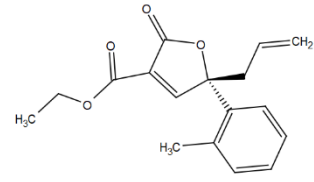

C17

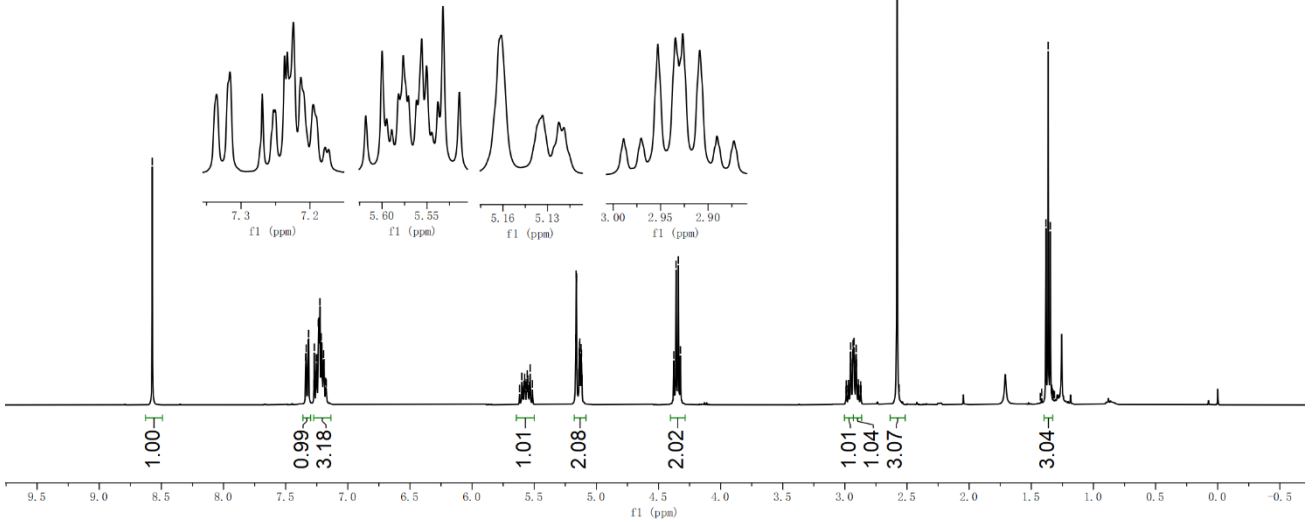

166.24  
164.26  
160.17  
135.56  
135.11  
133.01  
129.84  
128.81  
126.69  
126.35  
125.37  
121.01  
89.07  
61.88  
42.82  
21.85  
14.16

| Parameter              | Value                   |
|------------------------|-------------------------|
| Title                  | tanz-20230824-144.2.fid |
| Solvent                | CDCl3                   |
| Temperature            | 294.2                   |
| Number of Scans        | 256                     |
| Spectrometer Frequency | 100.64                  |

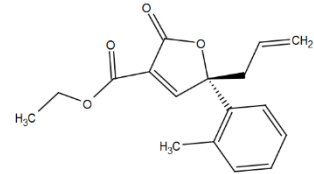

C17

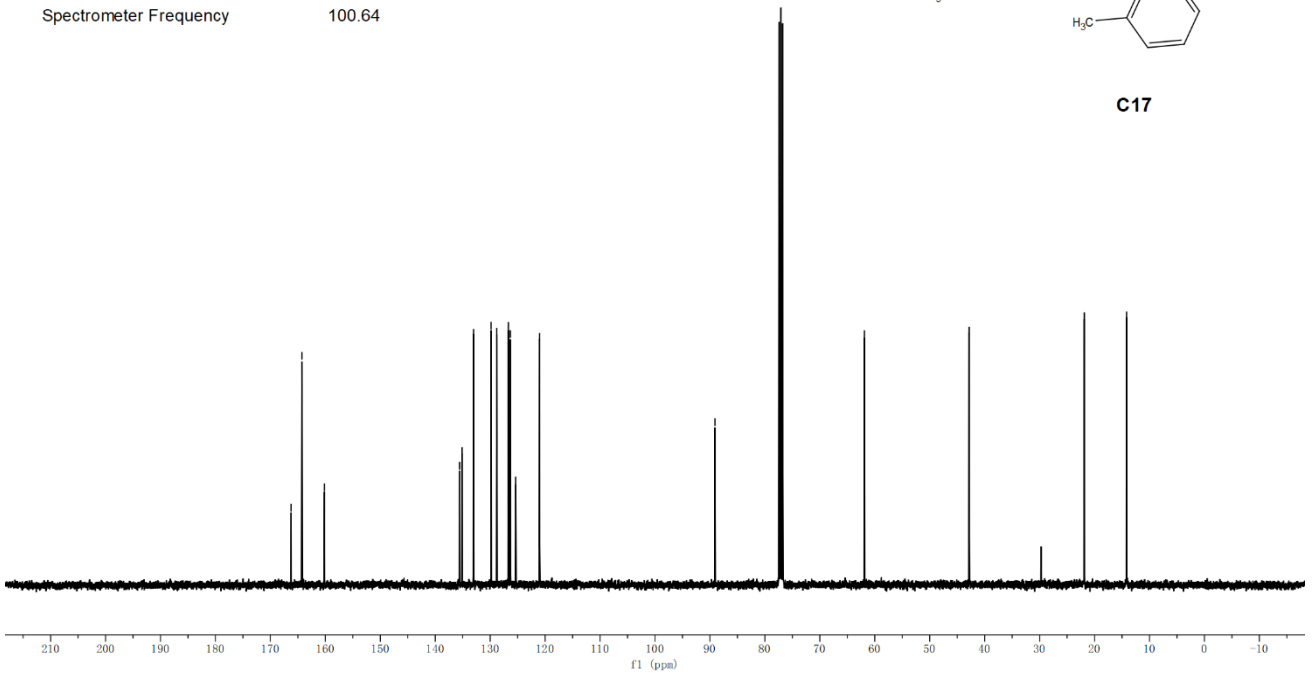

8.61  
7.65  
7.63  
7.63  
7.41  
7.40  
7.39  
7.37  
7.36  
7.25  
7.25  
7.24  
7.23  
7.22  
7.21  
7.11  
7.10  
7.09  
7.08  
6.87  
6.69  
6.51  
5.60  
5.56  
5.56  
5.13  
5.13  
5.12  
5.12  
5.12  
5.12  
5.10  
5.10  
5.09  
5.09  
5.09  
5.08  
5.08  
4.36  
4.35  
4.33  
4.31  
4.31  
3.01  
3.01  
3.01  
3.00  
3.00  
2.99  
2.98  
2.98  
2.97  
2.87  
2.87  
2.87  
2.85  
2.85  
2.85  
2.83  
2.82  
1.37  
1.36

| Parameter              | Value                    |
|------------------------|--------------------------|
| Title                  | as-20230824-tz-146.1.fid |
| Solvent                | CDCl3                    |
| Temperature            | 293.7                    |
| Number of Scans        | 16                       |
| Spectrometer Frequency | 400.18                   |

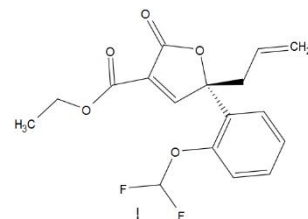

C18

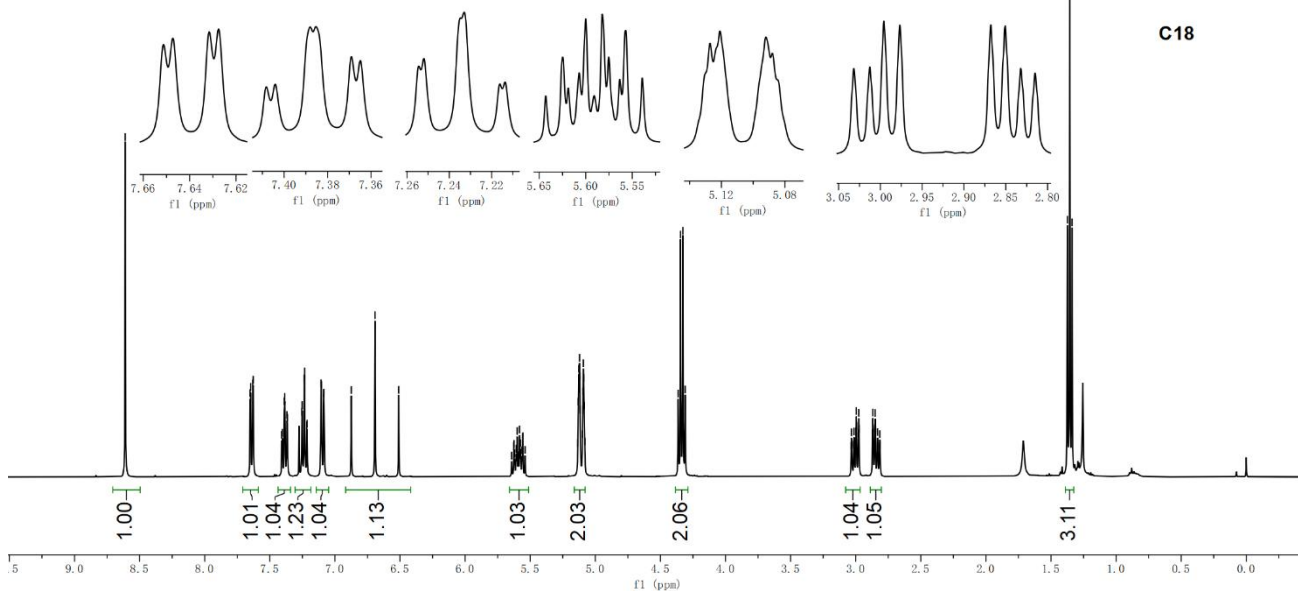

166.26  
163.83  
160.06  
147.90  
147.88  
147.85  
130.46  
129.77  
127.79  
127.63  
125.74  
124.74  
120.97  
118.63  
116.61  
116.05  
113.48  
87.03  
61.87  
41.89  
14.11

| Parameter              | Value                    |
|------------------------|--------------------------|
| Title                  | as-20230824-tz-146.2.fid |
| Solvent                | CDCl3                    |
| Temperature            | 294.3                    |
| Number of Scans        | 256                      |
| Spectrometer Frequency | 100.64                   |

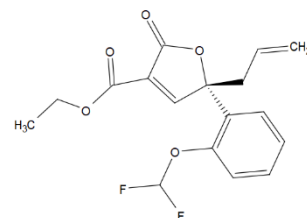

C18

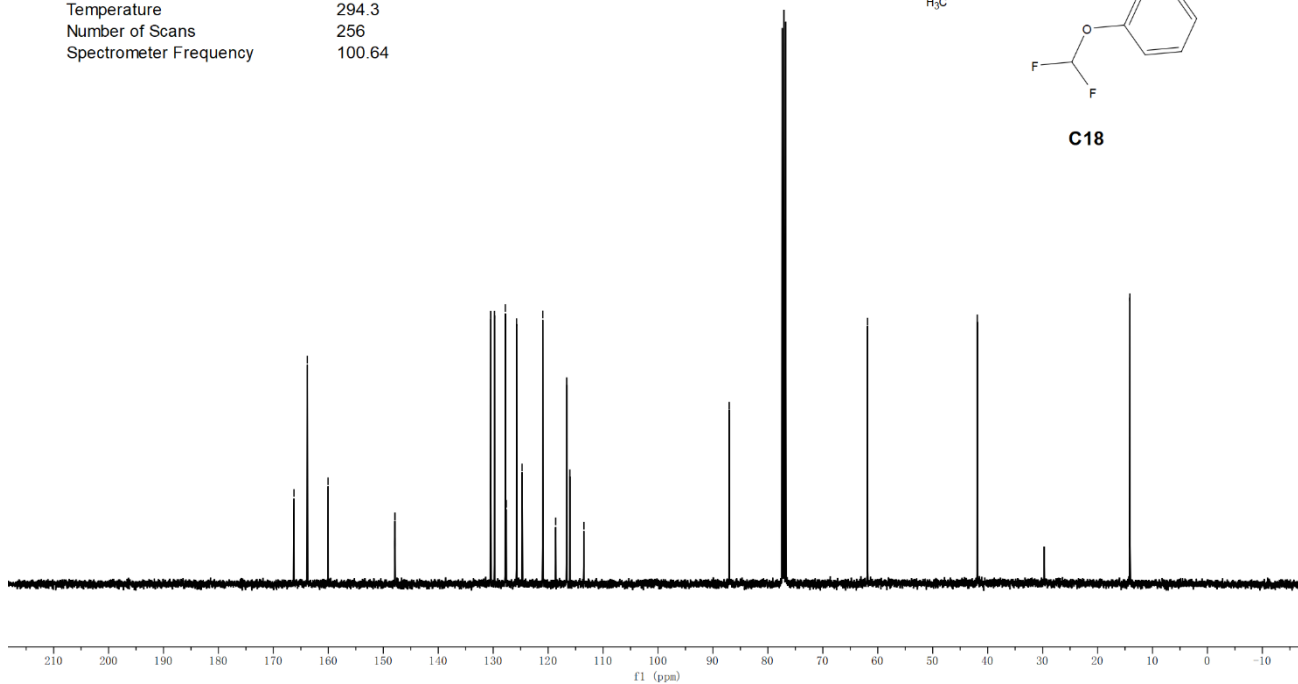

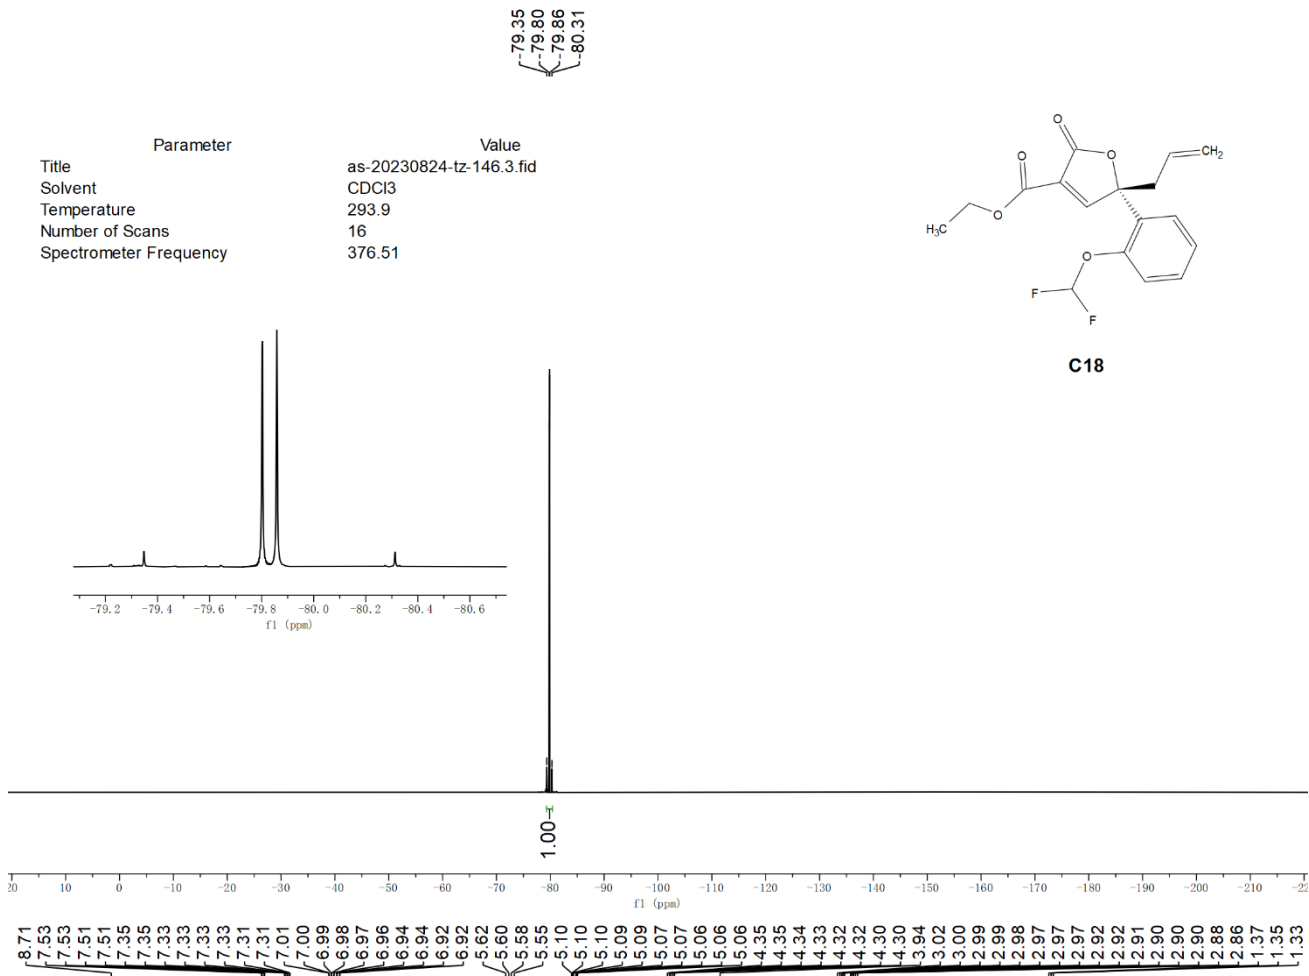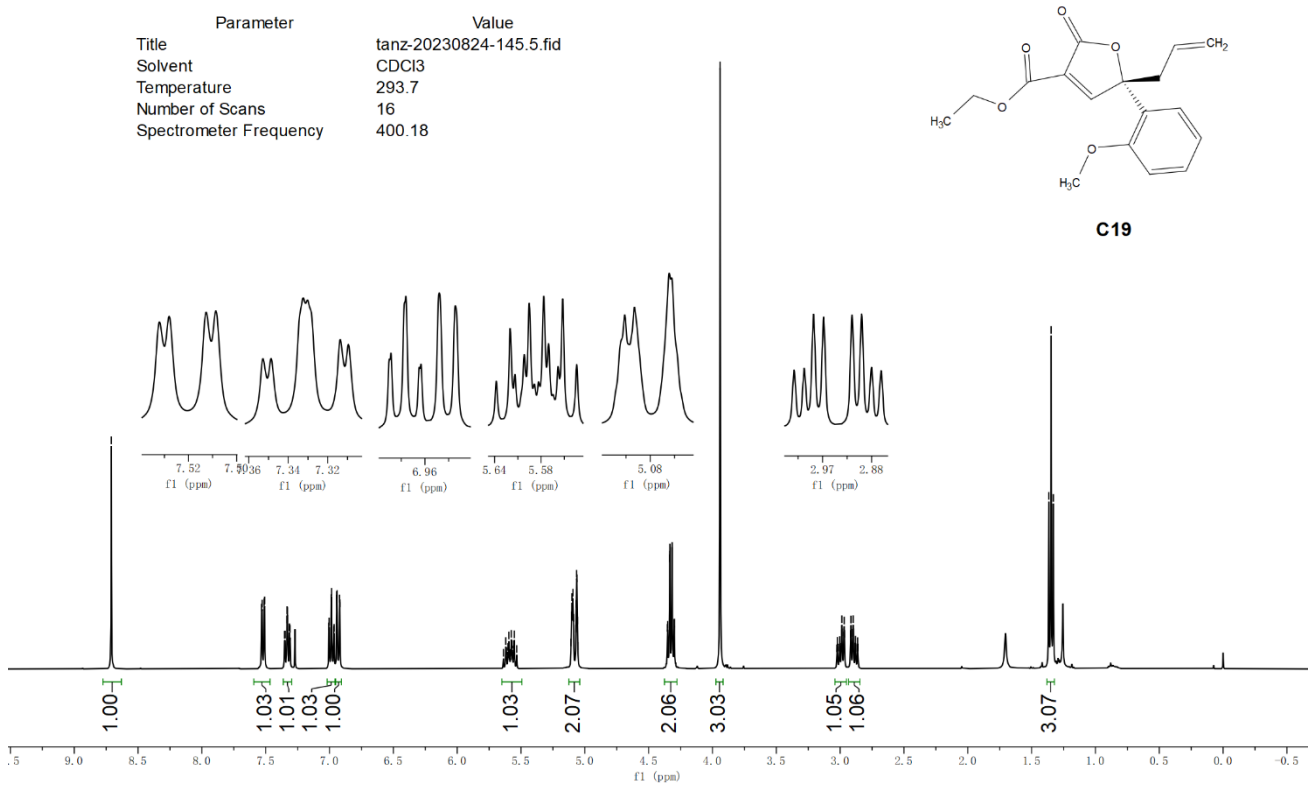

| Parameter              | Value                   |
|------------------------|-------------------------|
| Title                  | tanz-20230824-145.6.fid |
| Solvent                | CDCl3                   |
| Temperature            | 294.2                   |
| Number of Scans        | 256                     |
| Spectrometer Frequency | 100.64                  |

166.80  
165.37  
160.49  
155.10

130.44  
130.09  
126.55  
125.51  
124.03  
121.45  
120.38  
111.01

87.89

61.69  
55.49

41.12

14.17

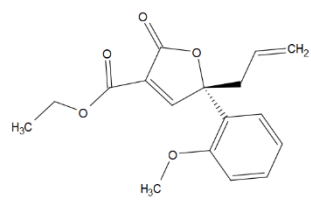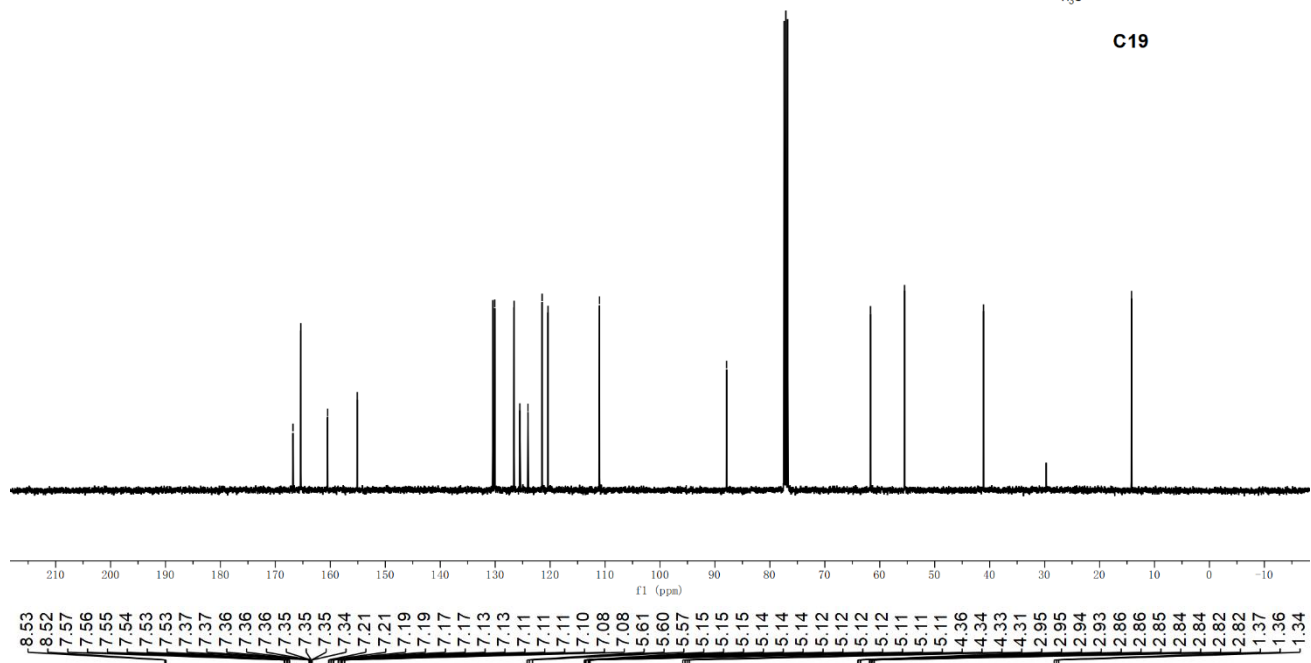

| Parameter              | Value                    |
|------------------------|--------------------------|
| Title                  | as-20230824-tz-147.7.fid |
| Solvent                | CDCl3                    |
| Temperature            | 293.7                    |
| Number of Scans        | 16                       |
| Spectrometer Frequency | 400.18                   |

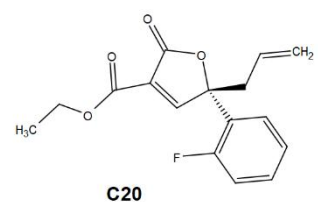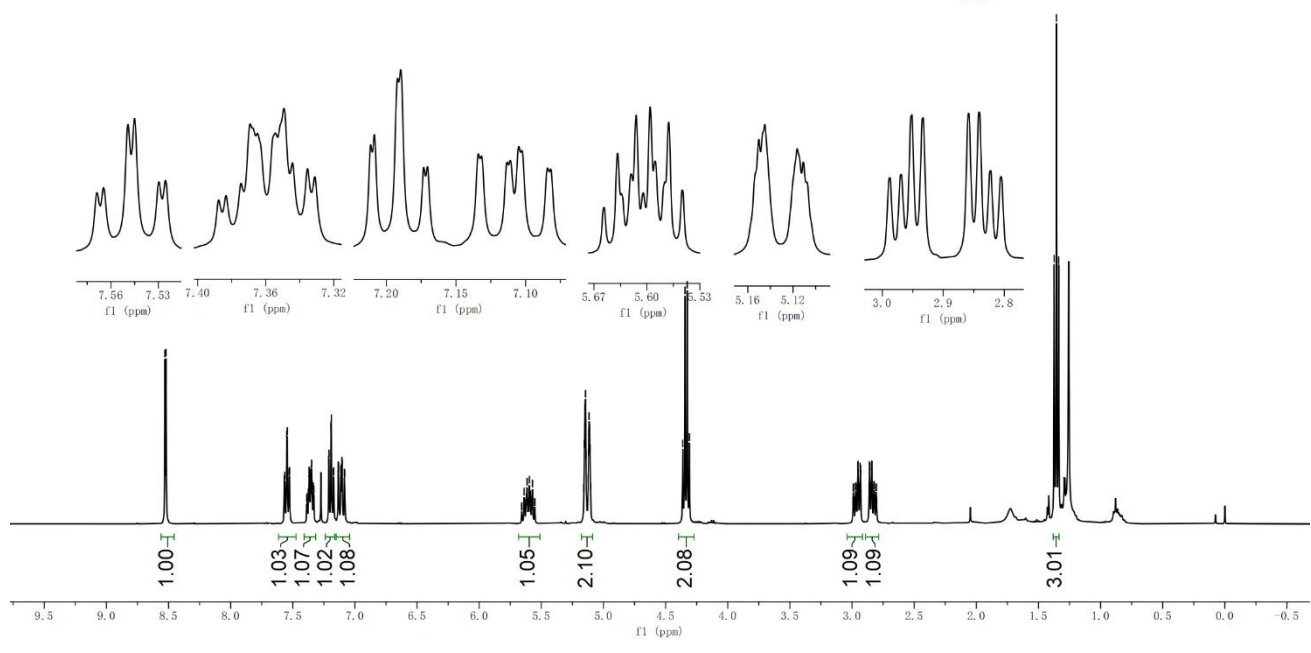

166.28  
163.66  
163.59  
159.98  
157.44  
130.79  
130.71  
129.49  
127.13  
127.09  
125.14  
125.11  
124.82  
124.75  
124.70  
121.25  
116.17  
115.95

86.29  
86.25

61.87

42.31  
42.28

14.13

| Parameter              | Value                    |
|------------------------|--------------------------|
| Title                  | as-20230824-tz-147.8.fid |
| Solvent                | CDCl3                    |
| Temperature            | 294.2                    |
| Number of Scans        | 256                      |
| Spectrometer Frequency | 100.64                   |

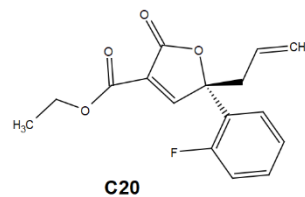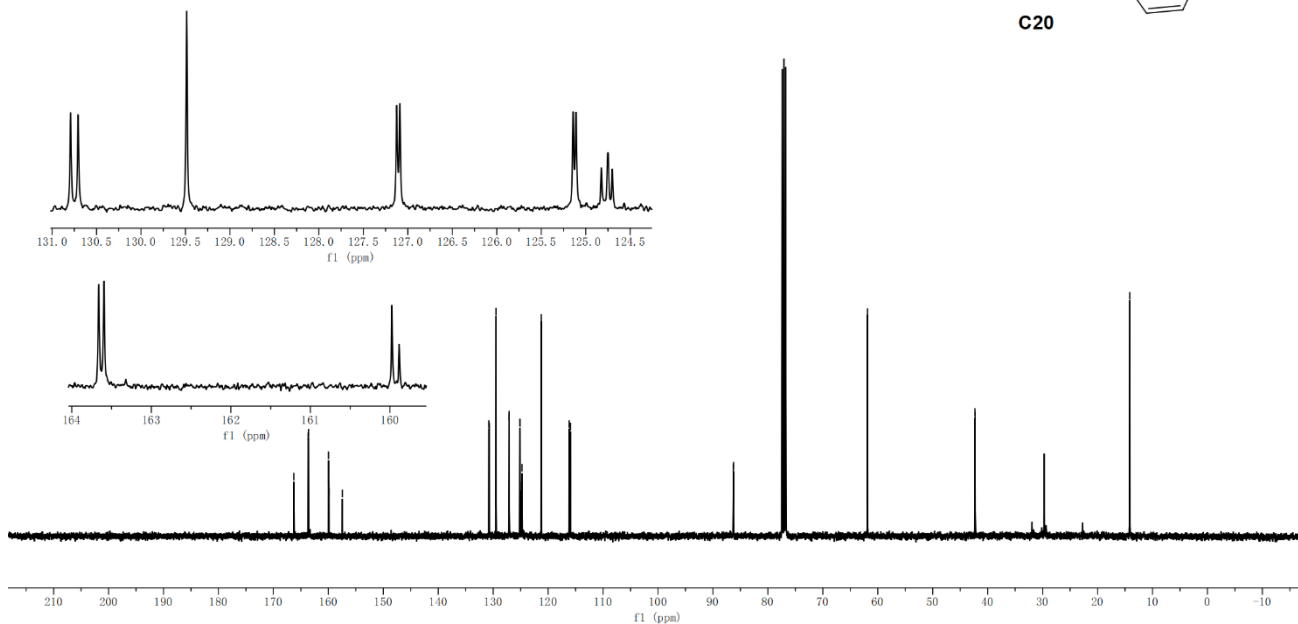

114.18

| Parameter              | Value                    |
|------------------------|--------------------------|
| Title                  | as-20230824-tz-147.9.fid |
| Solvent                | CDCl3                    |
| Temperature            | 293.9                    |
| Number of Scans        | 16                       |
| Spectrometer Frequency | 376.51                   |

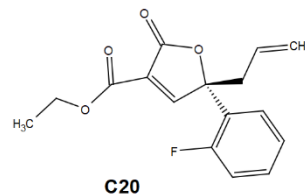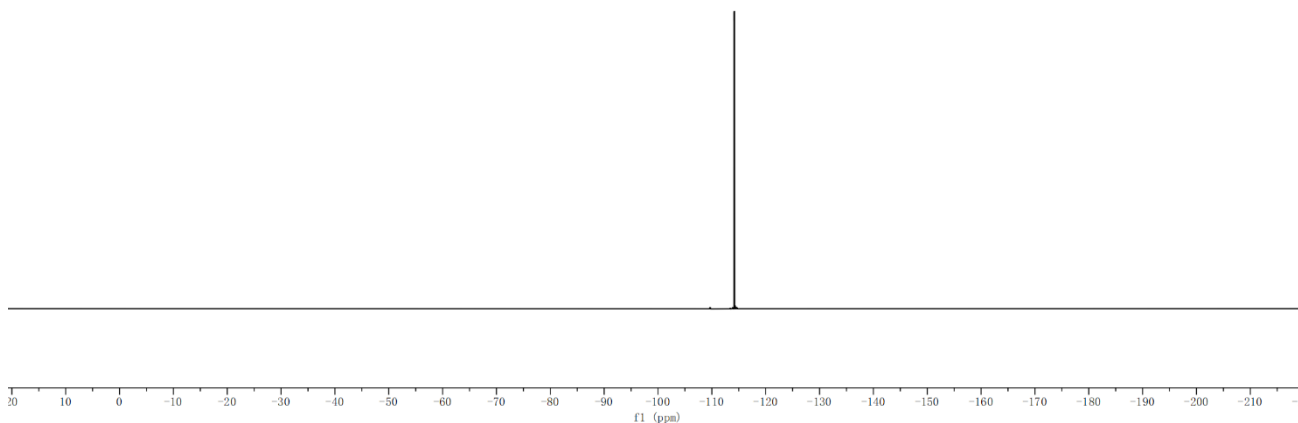

8.64  
7.85  
7.85  
7.83  
7.83  
7.81  
7.81  
7.79  
7.79  
7.68  
7.67  
7.66  
7.66  
7.64  
7.64  
7.56  
7.56  
7.54  
7.54  
7.52  
7.52  
5.65  
5.64  
5.63  
5.63  
5.62  
5.61  
5.60  
5.59  
5.59  
5.59  
5.57  
5.57  
5.55  
5.55  
5.17  
5.16  
5.15  
5.13  
5.12  
5.12  
4.37  
4.35  
4.33  
4.32  
4.32  
3.07  
3.05  
3.03  
3.01  
3.01  
2.94  
2.92  
2.90  
2.88  
1.36  
1.34

| Parameter              | Value                   |
|------------------------|-------------------------|
| Title                  | tanz-20230824-148.1.fid |
| Solvent                | CDCl3                   |
| Temperature            | 293.8                   |
| Number of Scans        | 16                      |
| Spectrometer Frequency | 400.18                  |

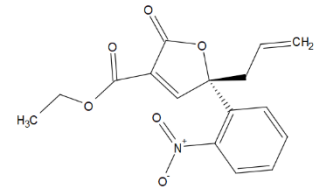

**C21**

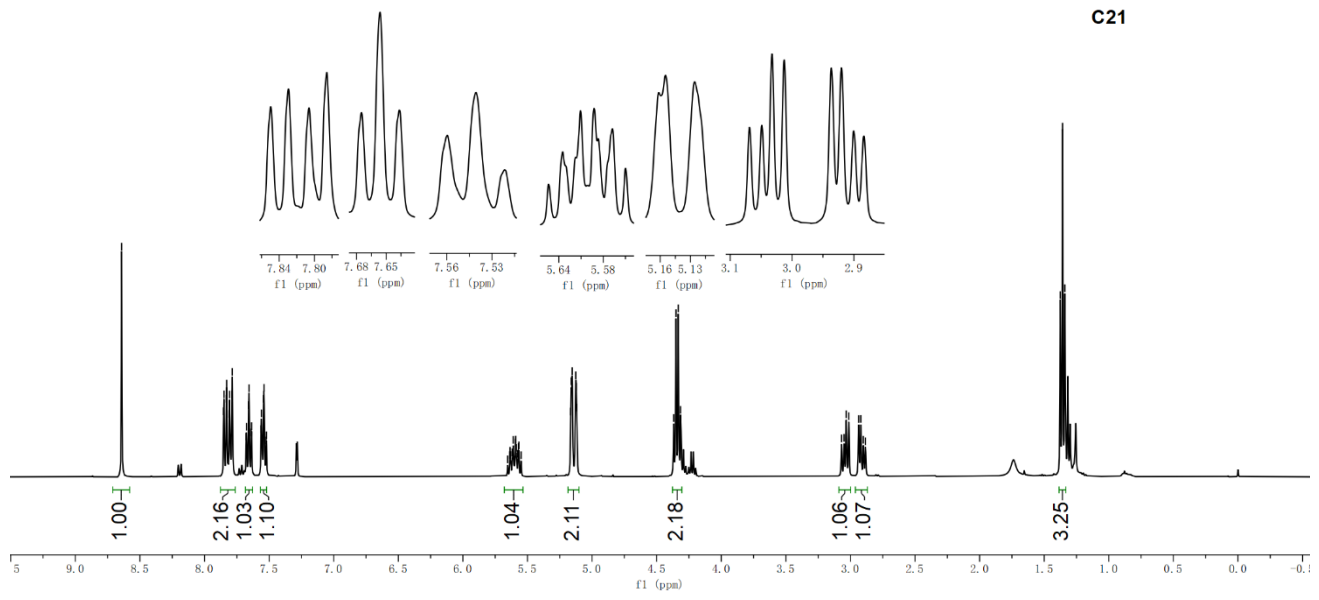

165.56  
163.38  
159.72  
148.38  
133.54  
131.04  
130.03  
129.32  
128.47  
125.81  
125.56  
121.77  
87.51  
62.02  
42.17  
14.11

| Parameter              | Value                   |
|------------------------|-------------------------|
| Title                  | tanz-20230824-148.2.fid |
| Solvent                | CDCl3                   |
| Temperature            | 294.3                   |
| Number of Scans        | 256                     |
| Spectrometer Frequency | 100.64                  |

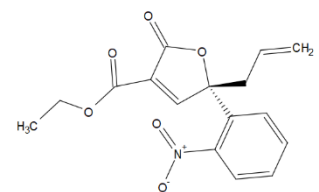

**C21**

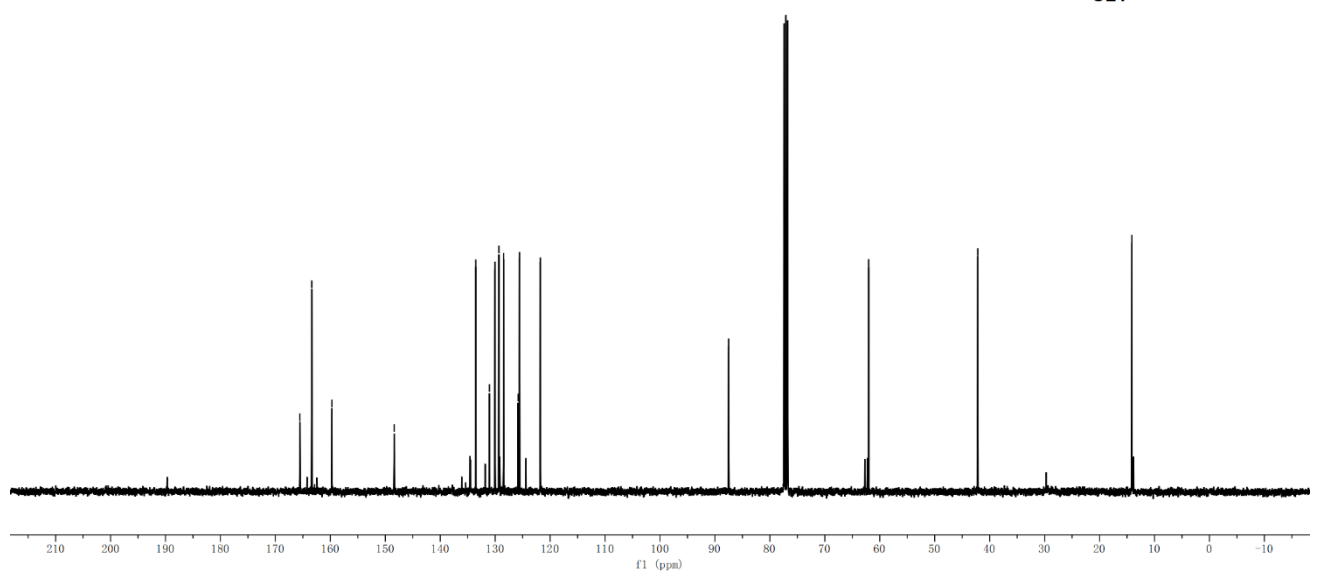



8.67  
7.28  
7.27  
7.27  
7.26  
7.25  
7.03  
7.02  
7.01  
7.01  
7.00  
6.99  
6.98  
6.88  
6.87  
6.86  
5.61  
5.59  
5.59  
5.57  
5.57  
5.54  
5.54  
5.11  
5.10  
5.10  
5.10  
5.09  
5.09  
5.08  
5.08  
5.08  
5.06  
5.06  
5.06  
4.36  
4.36  
4.34  
4.34  
4.33  
4.33  
4.31  
4.31  
3.93  
3.93  
2.99  
2.98  
2.98  
2.97  
2.96  
2.96  
2.96  
2.88  
2.88  
2.87  
2.86  
2.86  
2.84  
2.82  
1.37  
1.36

| Parameter              | Value                    |
|------------------------|--------------------------|
| Title                  | as-20230902-TZ-157.1.fid |
| Solvent                | CDCl3                    |
| Temperature            | 293.8                    |
| Number of Scans        | 16                       |
| Spectrometer Frequency | 400.18                   |

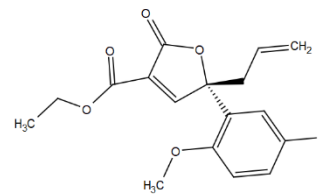

C22

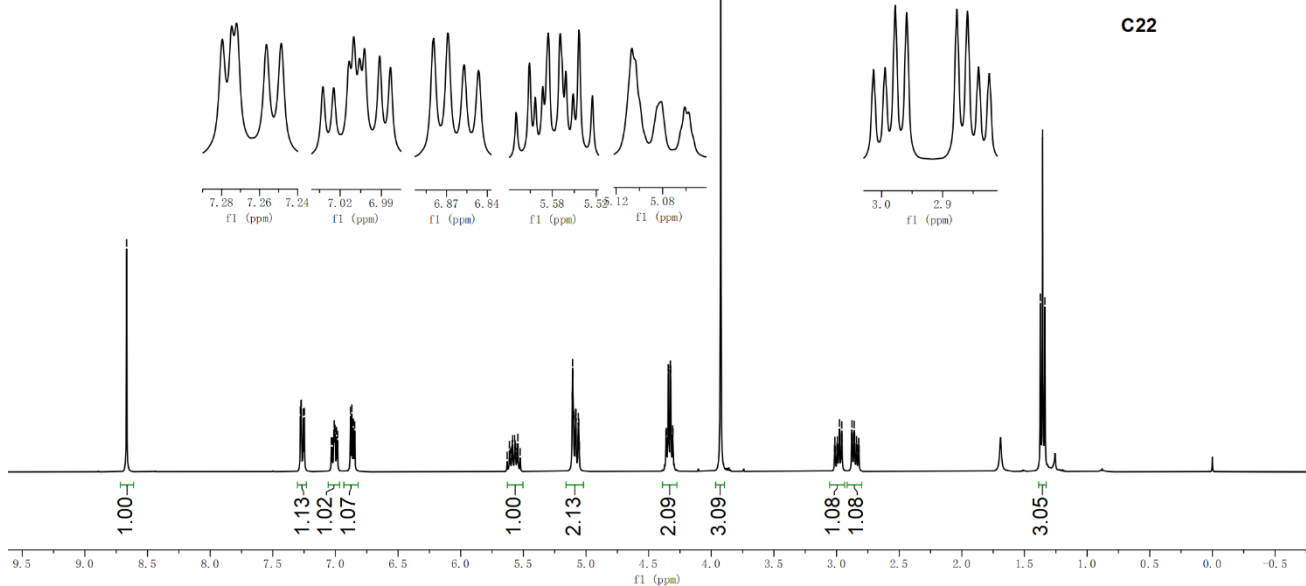

166.39  
164.62  
160.33  
158.43  
156.04  
151.19  
151.16  
130.07  
127.11  
127.04  
124.38  
120.71  
116.00  
115.77  
114.16  
113.90  
111.98  
111.90  
-87.29  
-61.80  
-56.00  
-40.97  
-14.15

| Parameter              | Value                    |
|------------------------|--------------------------|
| Title                  | as-20230902-TZ-157.2.fid |
| Solvent                | CDCl3                    |
| Temperature            | 294.4                    |
| Number of Scans        | 256                      |
| Spectrometer Frequency | 100.64                   |

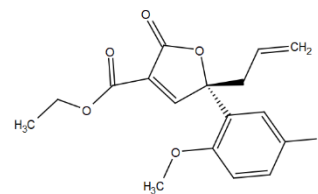

C22

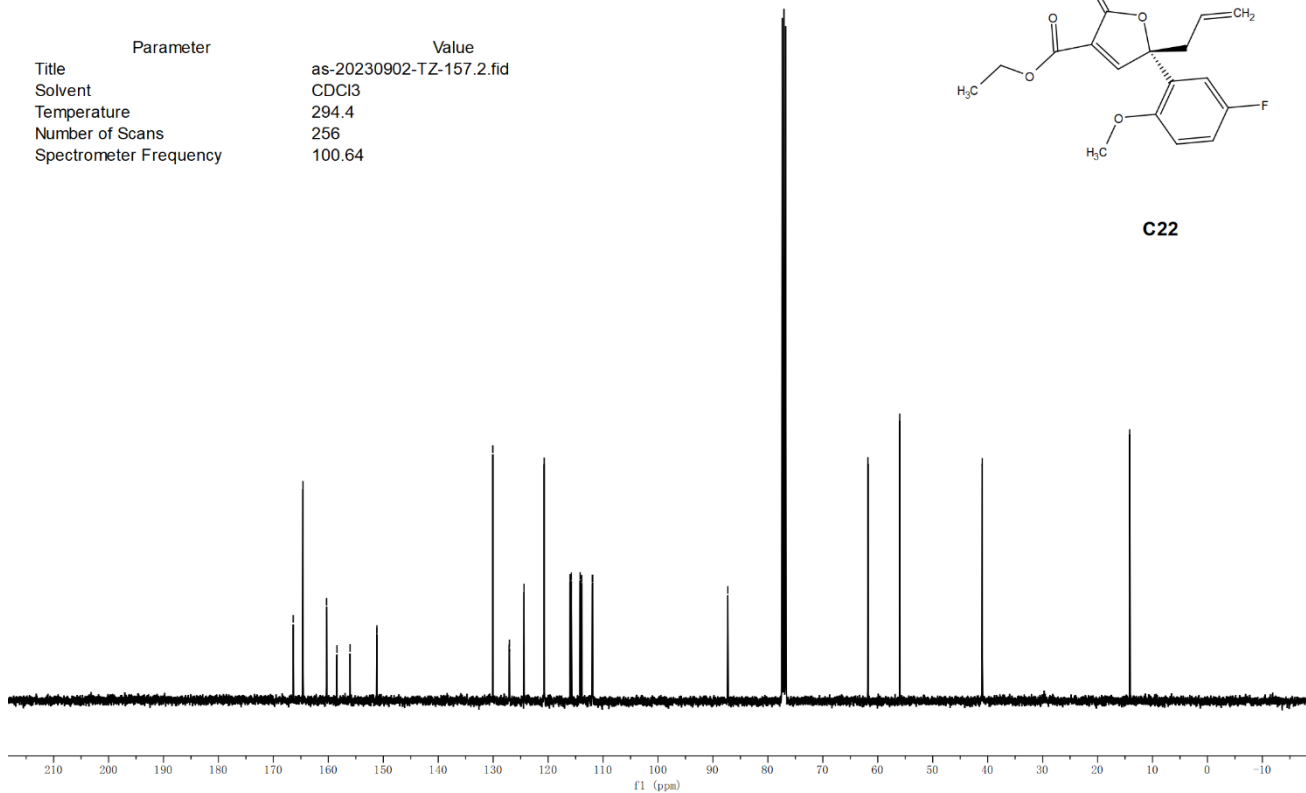

| Parameter              | Value                    |
|------------------------|--------------------------|
| Title                  | as-20230902-TZ-157.3.fid |
| Solvent                | CDCl3                    |
| Temperature            | 294.0                    |
| Number of Scans        | 16                       |
| Spectrometer Frequency | 376.51                   |

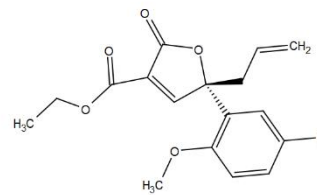

C22

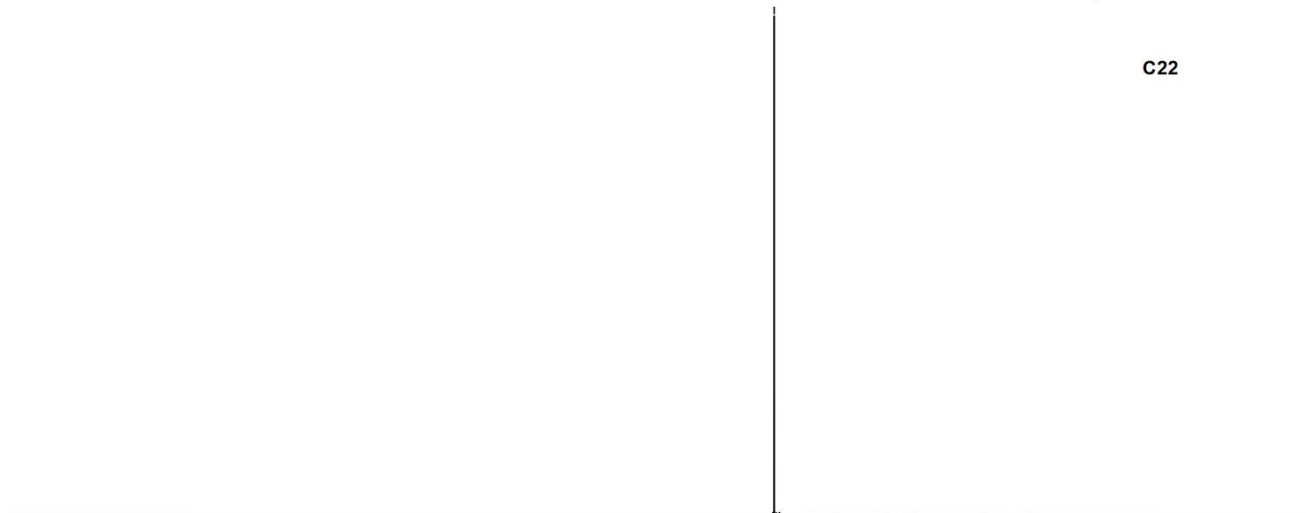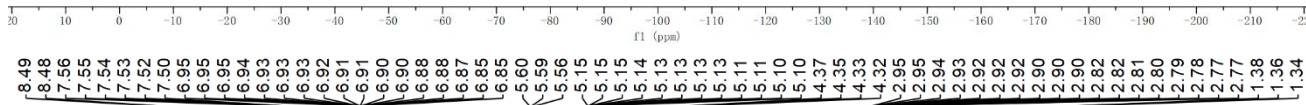

| Parameter              | Value                    |
|------------------------|--------------------------|
| Title                  | as-20230902-TZ-158.7.fid |
| Solvent                | CDCl3                    |
| Temperature            | 293.7                    |
| Number of Scans        | 16                       |
| Spectrometer Frequency | 400.18                   |

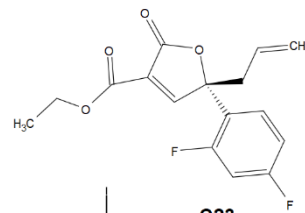

C23

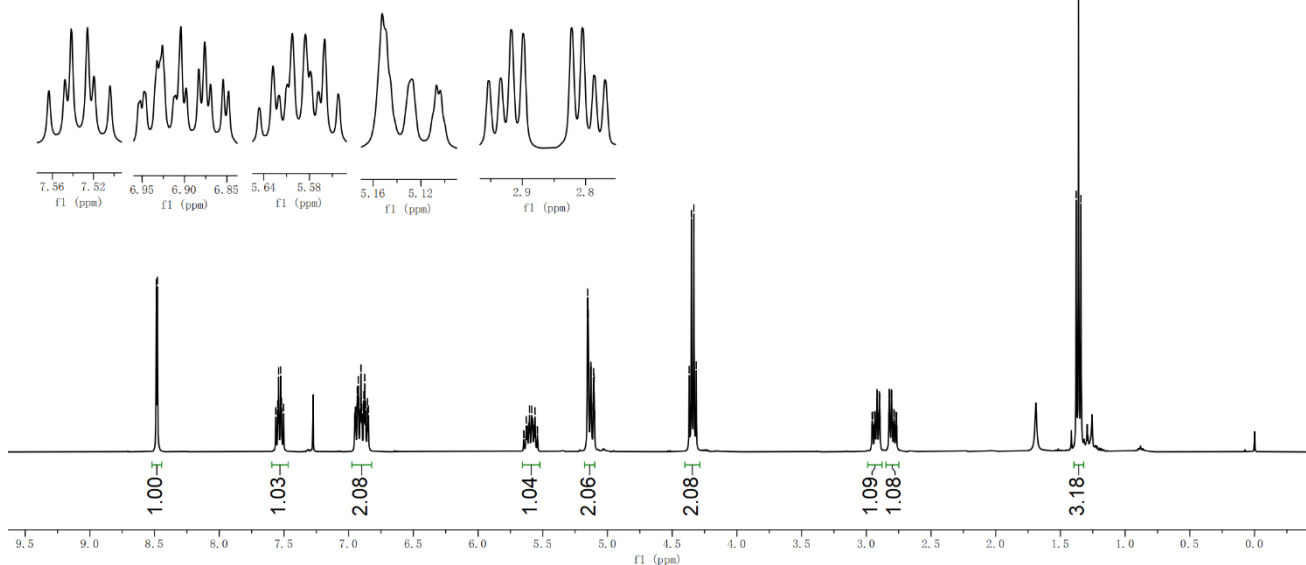

166.03  
164.50  
164.37  
163.27  
163.21  
162.00  
161.88  
160.05  
159.93  
159.88  
157.58  
157.46  
129.28  
128.38  
128.33  
128.29  
128.23  
124.90  
121.45  
120.96  
120.92  
120.84  
120.80  
112.38  
112.34  
112.16  
112.13  
104.88  
104.63  
104.37  
85.91  
85.86

| Parameter              | Value                    |
|------------------------|--------------------------|
| Title                  | as-20230902-TZ-158.8.fid |
| Solvent                | CDCl3                    |
| Temperature            | 294.3                    |
| Number of Scans        | 256                      |
| Spectrometer Frequency | 100.64                   |

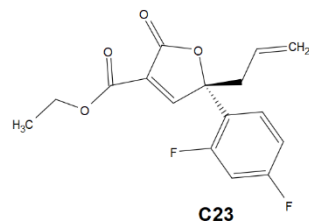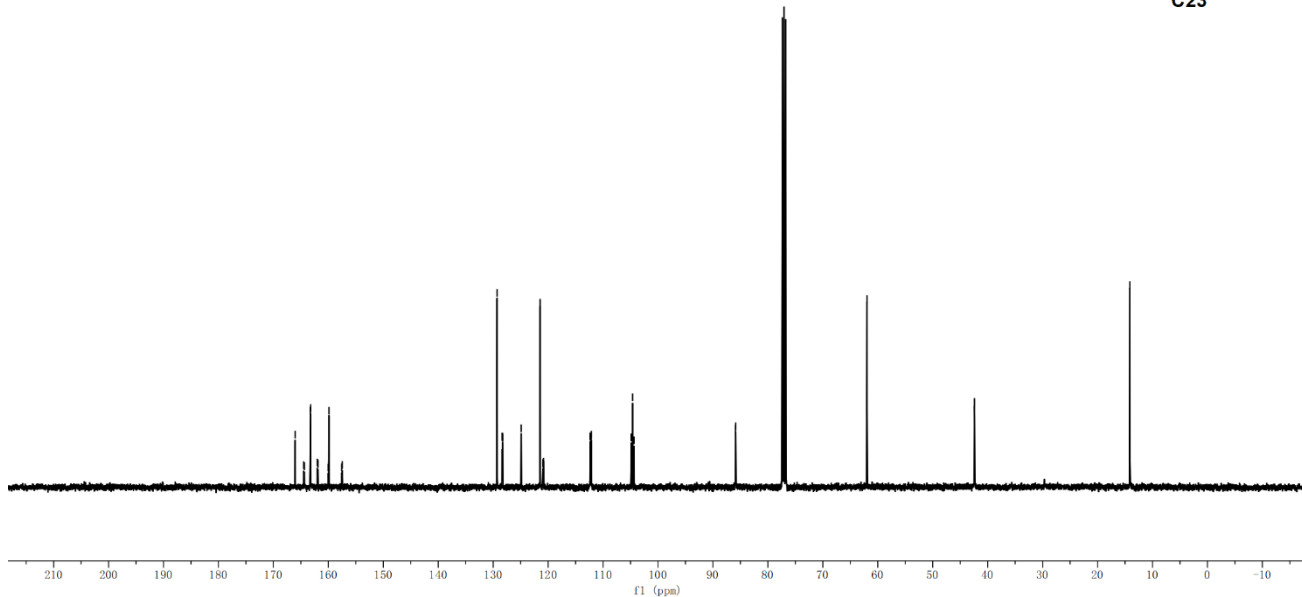

| Parameter              | Value                    |
|------------------------|--------------------------|
| Title                  | as-20230902-TZ-158.9.fid |
| Solvent                | CDCl3                    |
| Temperature            | 293.9                    |
| Number of Scans        | 16                       |
| Spectrometer Frequency | 376.51                   |

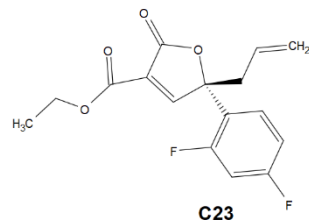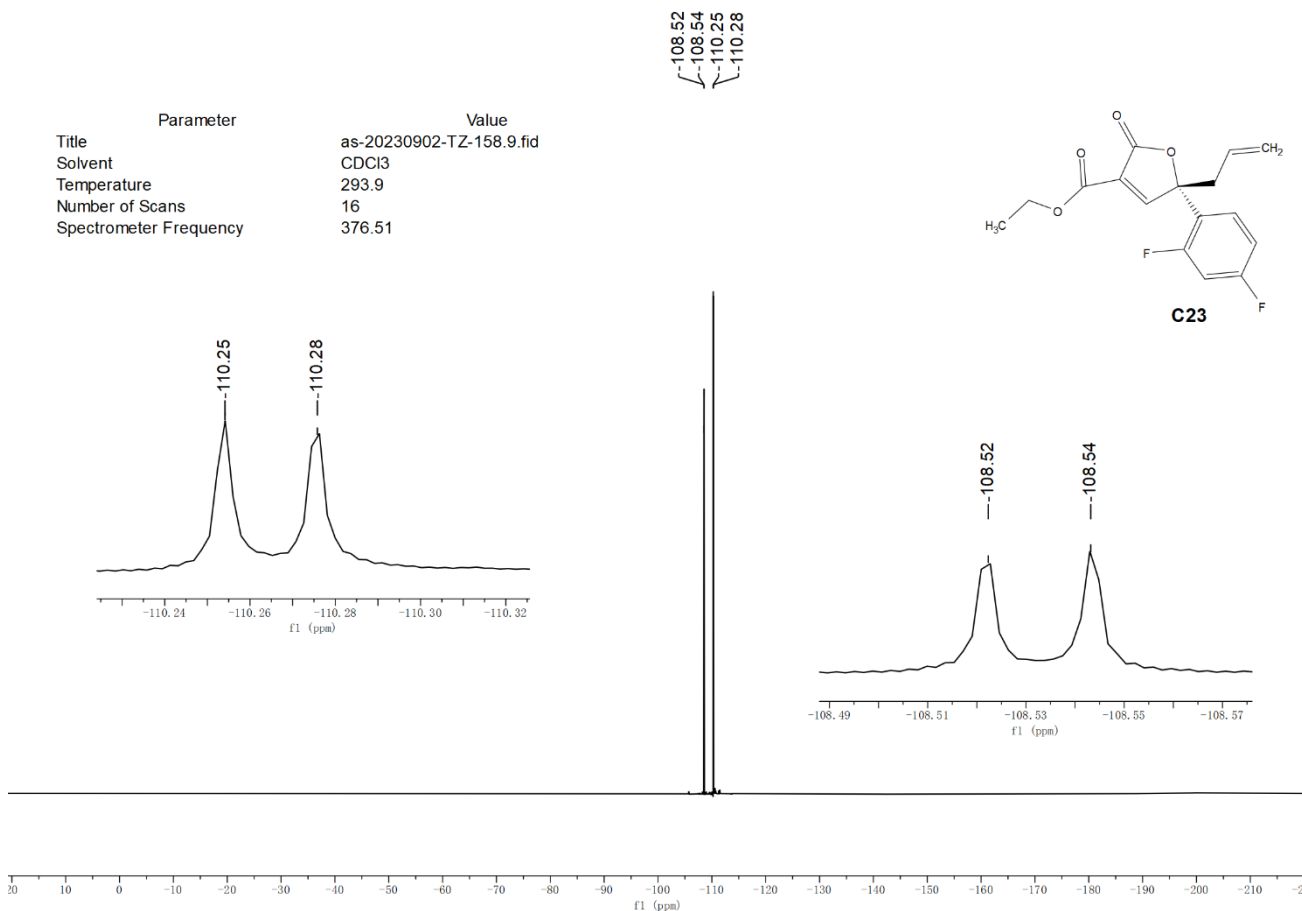

8.69  
7.09  
7.09  
7.09  
7.08  
6.87  
6.85  
6.84  
5.62  
5.60  
5.58  
5.57  
5.55  
5.12  
5.11  
5.11  
5.10  
5.10  
5.10  
5.08  
5.08  
5.07  
5.07  
5.06  
4.36  
4.36  
4.34  
4.34  
4.32  
4.32  
4.31  
4.30  
4.30  
3.89  
3.76  
3.02  
3.02  
3.01  
3.00  
3.00  
3.00  
2.99  
2.98  
2.98  
2.97  
2.96  
2.96  
2.91  
2.90  
2.90  
2.89  
2.89  
2.88  
2.87  
2.87  
2.86  
2.85  
2.85  
1.37  
1.35  
1.33

| Parameter              | Value                   |
|------------------------|-------------------------|
| Title                  | tanz-20230907-159.1.fid |
| Solvent                | CDCl3                   |
| Temperature            | 293.7                   |
| Number of Scans        | 16                      |
| Spectrometer Frequency | 400.18                  |

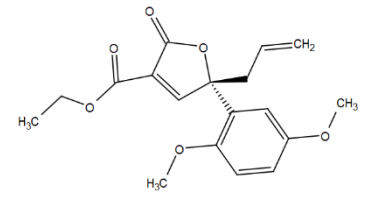

C24

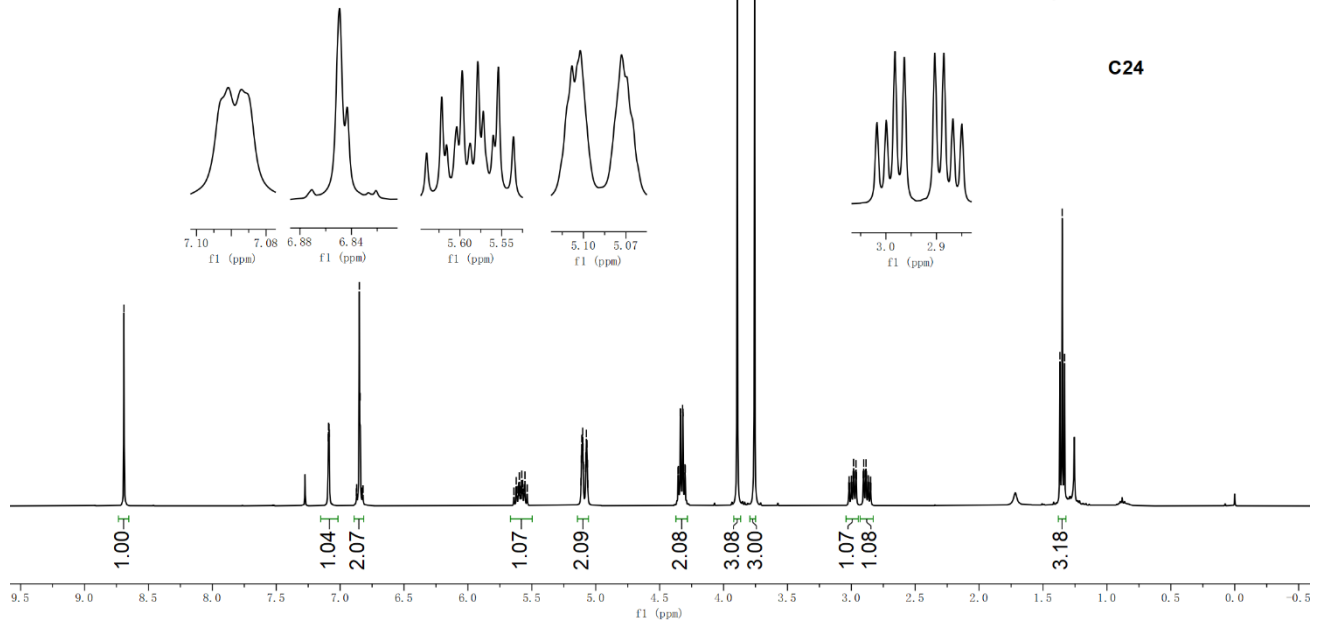

166.76  
165.27  
160.45  
154.06  
149.12  
130.35  
126.27  
124.02  
120.46  
114.87  
112.10  
112.05  
-87.75  
-61.70  
-55.84  
-41.11  
-29.71  
-14.16

| Parameter              | Value                   |
|------------------------|-------------------------|
| Title                  | tanz-20230907-159.2.fid |
| Solvent                | CDCl3                   |
| Temperature            | 294.2                   |
| Number of Scans        | 256                     |
| Spectrometer Frequency | 100.64                  |

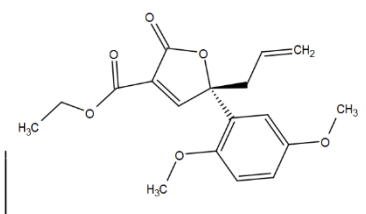

C24

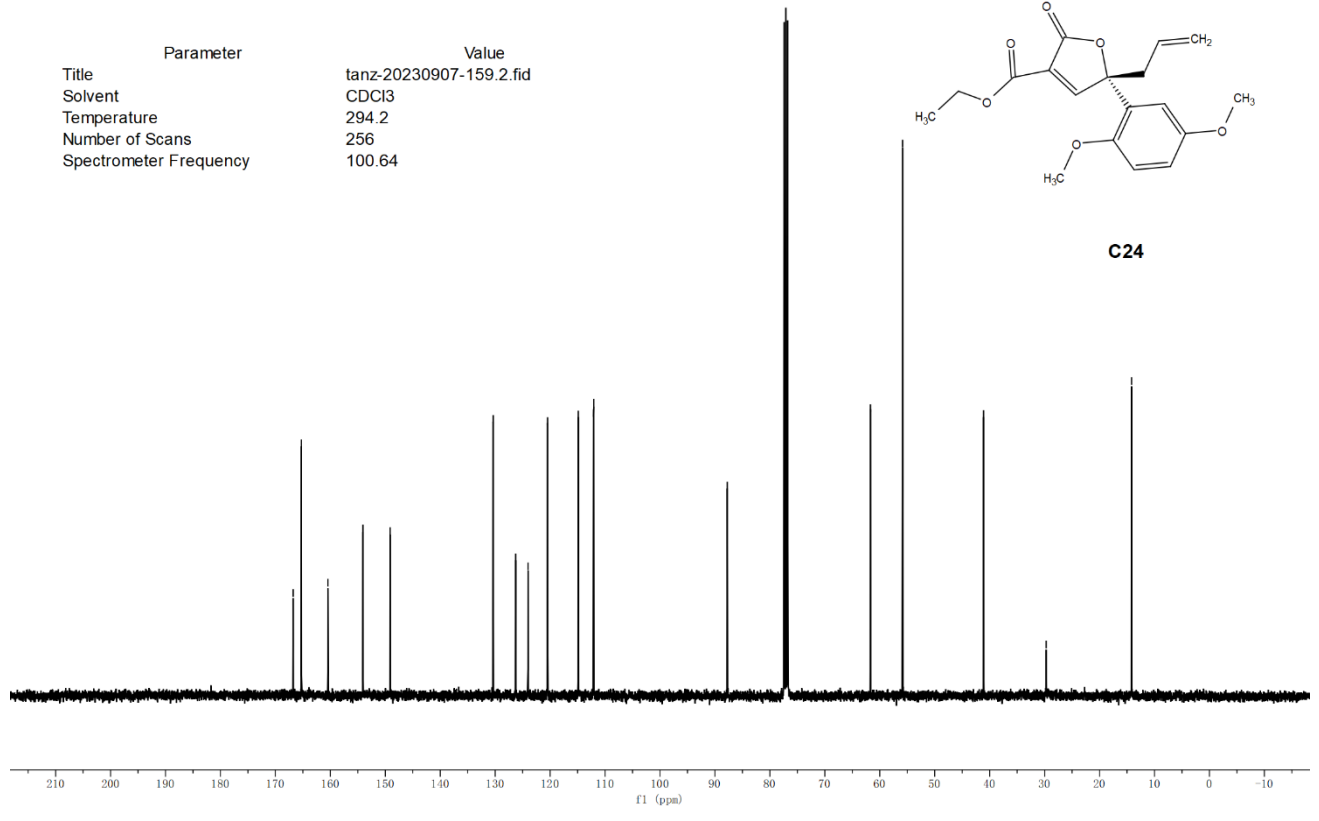

8.21  
7.36  
7.35  
7.34  
7.34  
7.05  
7.04  
7.04  
7.03  
7.02  
7.01  
5.70  
5.68  
5.67  
5.66  
5.66  
5.64  
5.63  
5.62  
5.61  
5.60  
5.23  
5.22  
5.20  
5.19  
5.19  
5.18  
4.38  
4.36  
4.34  
4.33  
3.03  
3.01  
3.00  
2.98  
2.96  
2.94  
2.92

| Parameter              | Value                   |
|------------------------|-------------------------|
| Title                  | tanz-20230902-156.7.fid |
| Solvent                | CDCl3                   |
| Temperature            | 293.8                   |
| Number of Scans        | 16                      |
| Spectrometer Frequency | 400.18                  |

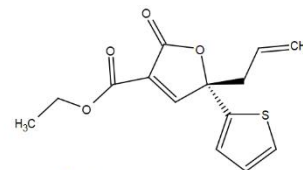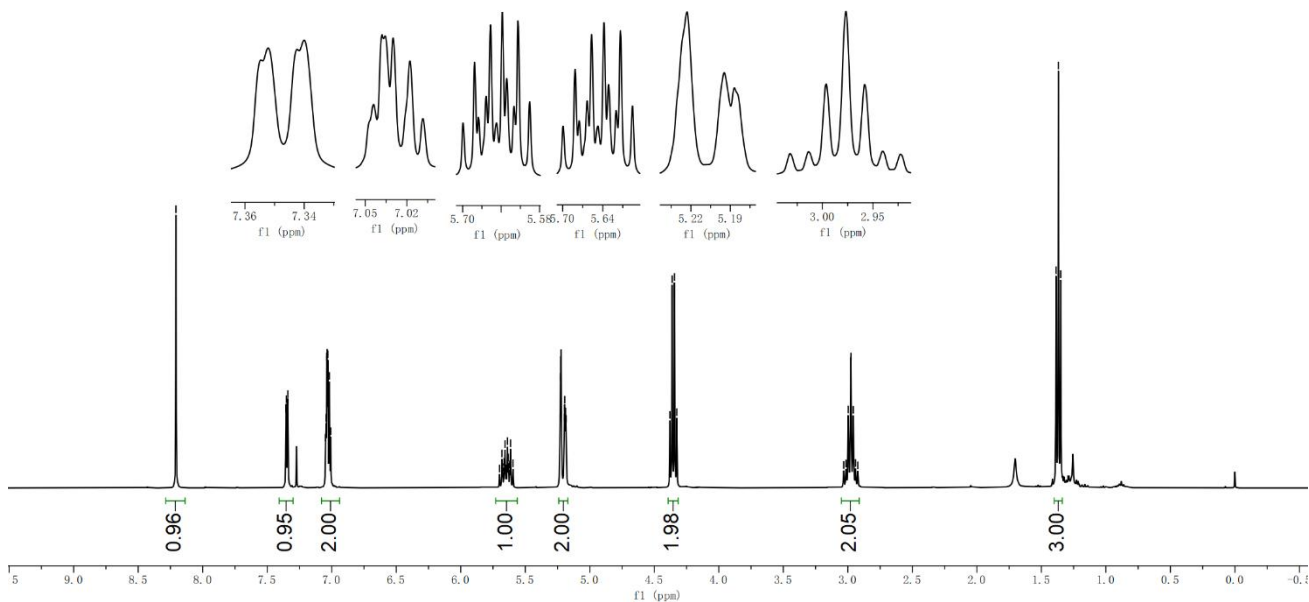

166.16  
163.75  
159.95  
139.53  
129.30  
127.35  
126.47  
125.39  
124.96  
121.65  
85.63  
61.97  
43.69  
14.13

| Parameter              | Value                   |
|------------------------|-------------------------|
| Title                  | tanz-20230902-156.8.fid |
| Solvent                | CDCl3                   |
| Temperature            | 294.3                   |
| Number of Scans        | 256                     |
| Spectrometer Frequency | 100.64                  |

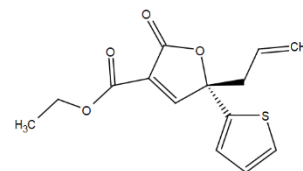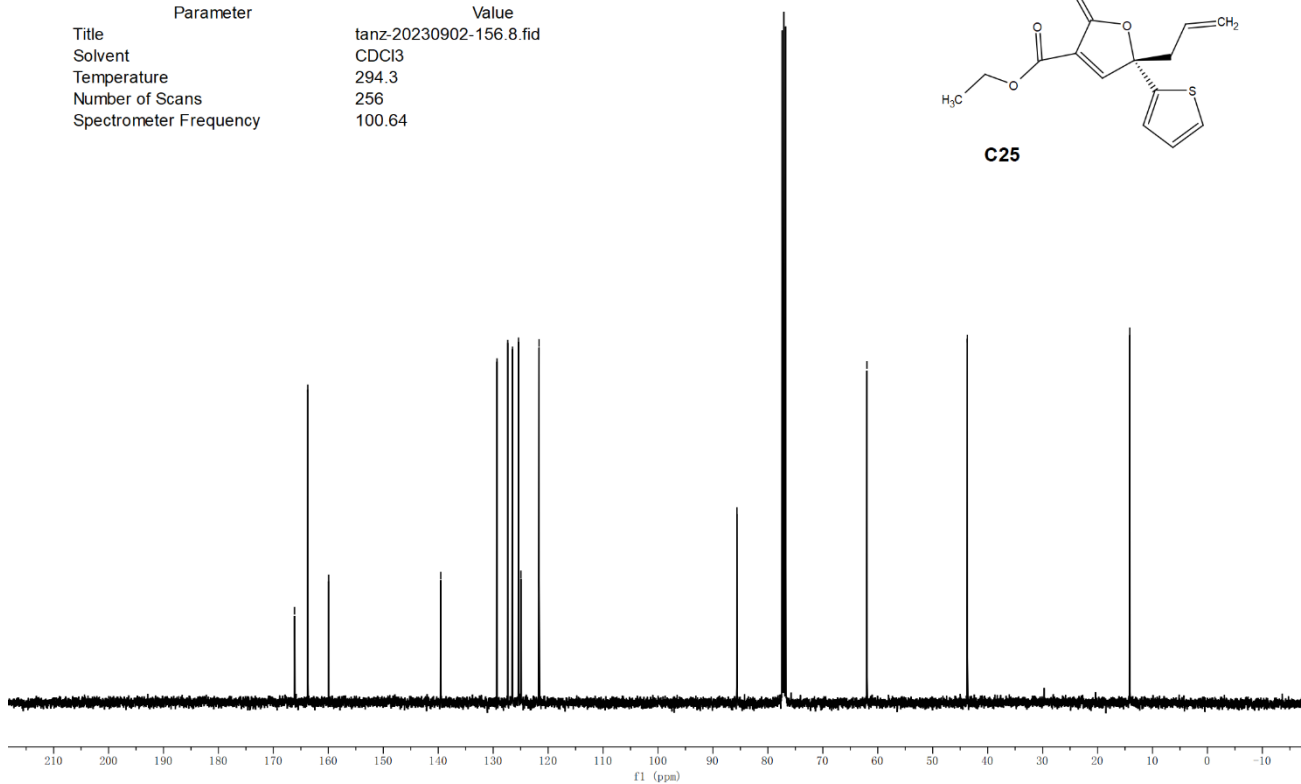

8.44  
7.90  
7.88  
7.88  
7.87  
7.86  
7.85  
7.84  
7.84  
7.83  
7.83  
7.55  
7.54  
7.53  
7.53  
7.52  
7.52  
7.51  
7.50  
7.50  
7.49  
7.48  
7.47  
7.46  
5.67  
5.65  
5.65  
5.63  
5.62  
5.60  
5.20  
5.19  
5.19  
5.18  
5.17  
5.17  
5.15  
5.15  
5.14  
4.36  
4.35  
4.33  
4.31  
3.04  
3.02  
3.01  
3.00  
2.99  
2.98  
2.98  
2.96  
2.95  
2.95  
2.94  
2.93  
2.92  
2.90  
1.37  
1.35  
1.33

| Parameter              | Value                   |
|------------------------|-------------------------|
| Title                  | tanz-20230902-155.5.fid |
| Solvent                | CDCl3                   |
| Temperature            | 293.9                   |
| Number of Scans        | 16                      |
| Spectrometer Frequency | 400.18                  |

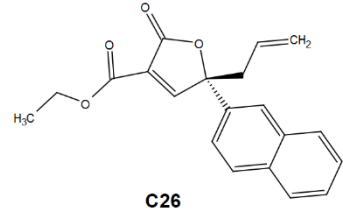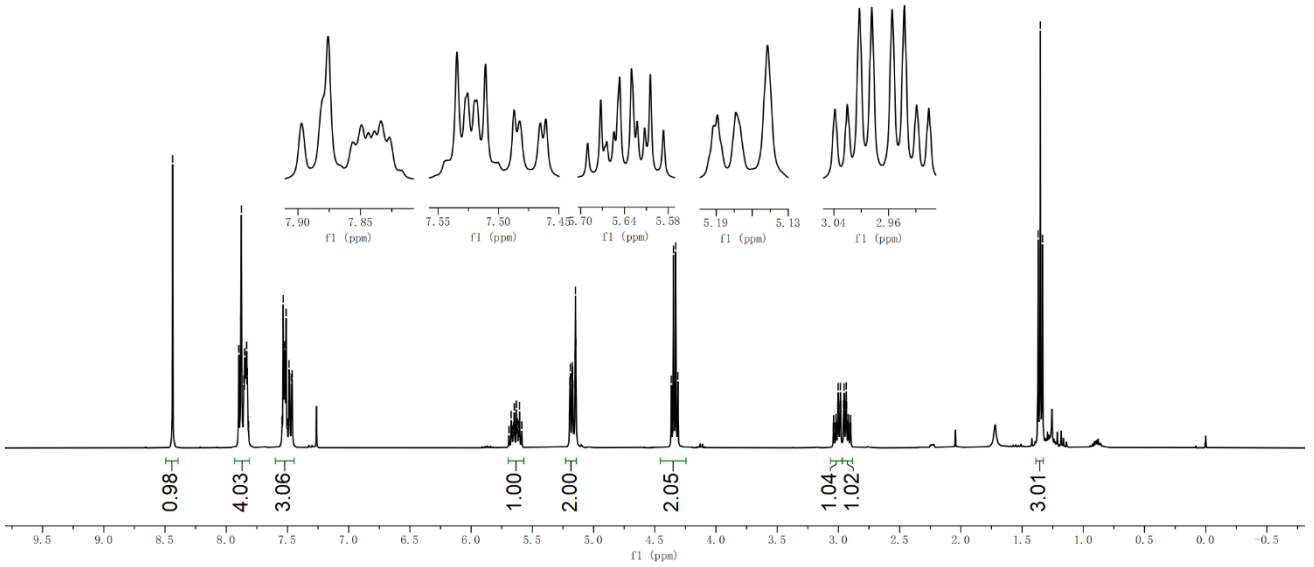

166.68  
164.93  
160.09  
134.43  
133.09  
132.99  
129.65  
129.03  
128.25  
127.70  
126.94  
126.91  
124.74  
124.51  
122.56  
121.29  
88.09  
61.89  
43.75  
14.15

| Parameter              | Value                   |
|------------------------|-------------------------|
| Title                  | tanz-20230902-155.6.fid |
| Solvent                | CDCl3                   |
| Temperature            | 294.3                   |
| Number of Scans        | 256                     |
| Spectrometer Frequency | 100.64                  |

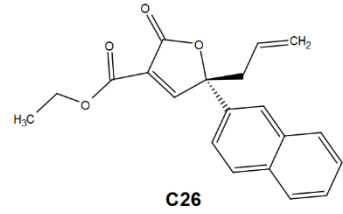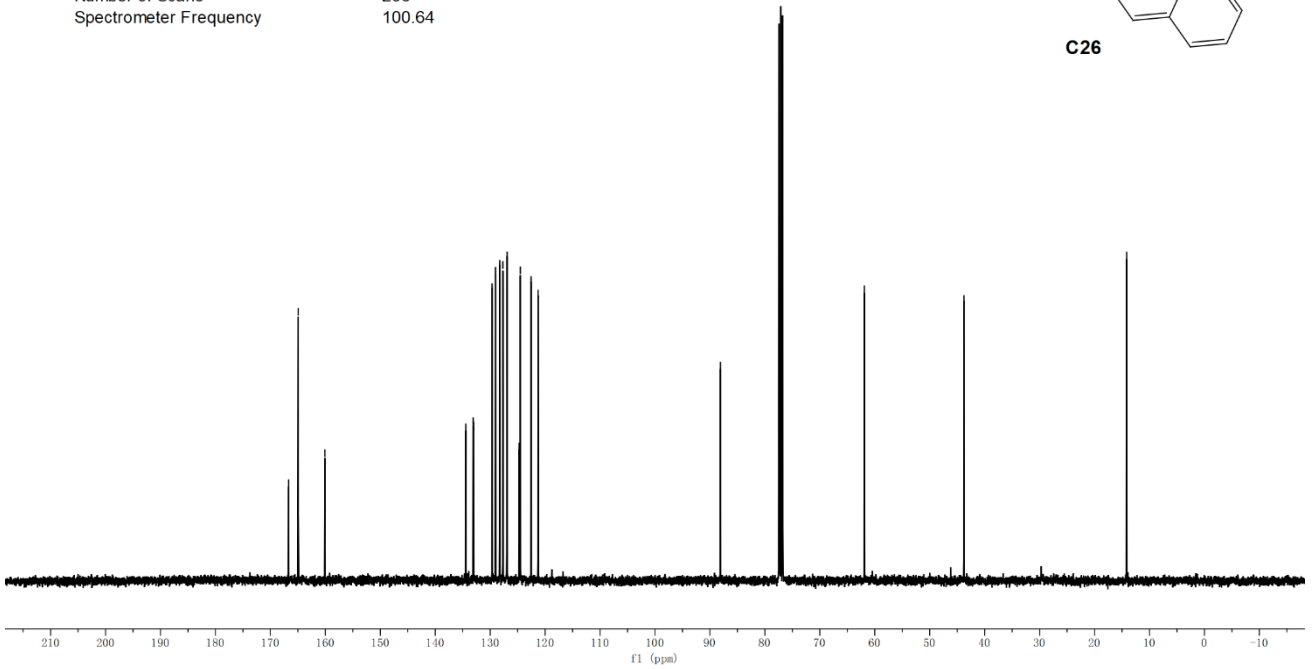

-8.05

5.71  
5.69  
5.69  
5.67  
5.67  
5.65  
5.64  
5.63  
5.62  
5.61  
5.20  
5.20  
5.20  
5.20  
5.19  
5.18  
5.18  
5.17  
5.17  
5.17  
5.14  
5.14  
5.13  
5.13  
4.35  
4.33  
4.30  
4.30  
2.54  
2.54  
2.54  
2.52  
2.52  
1.50  
1.36  
1.35  
1.33

| Parameter              | Value                   |
|------------------------|-------------------------|
| Title                  | tanz-20230907-161.9.fid |
| Solvent                | CDCl3                   |
| Temperature            | 293.8                   |
| Number of Scans        | 16                      |
| Spectrometer Frequency | 400.18                  |

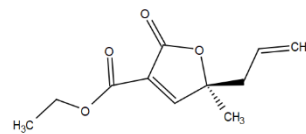

C27

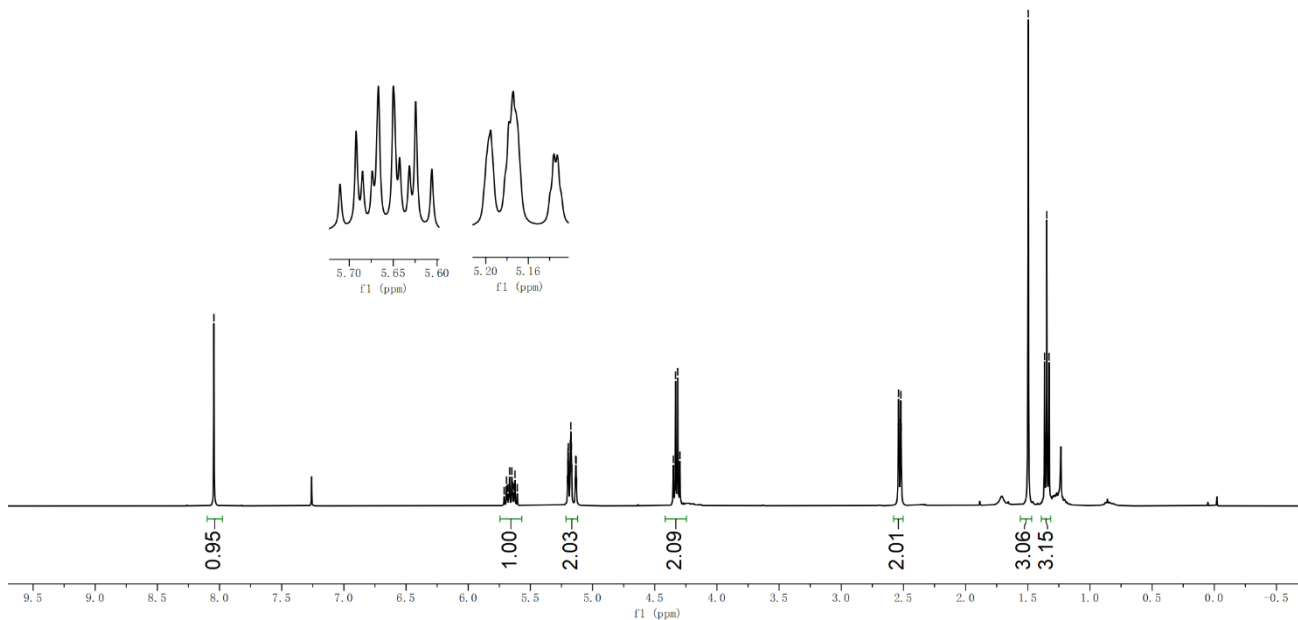

166.75  
166.33  
160.22  
130.23  
125.33  
120.93  
85.26  
61.77  
42.63  
23.13  
14.13

| Parameter              | Value                    |
|------------------------|--------------------------|
| Title                  | tanz-20230907-161.10.fid |
| Solvent                | CDCl3                    |
| Temperature            | 294.1                    |
| Number of Scans        | 256                      |
| Spectrometer Frequency | 100.64                   |

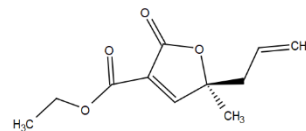

C27

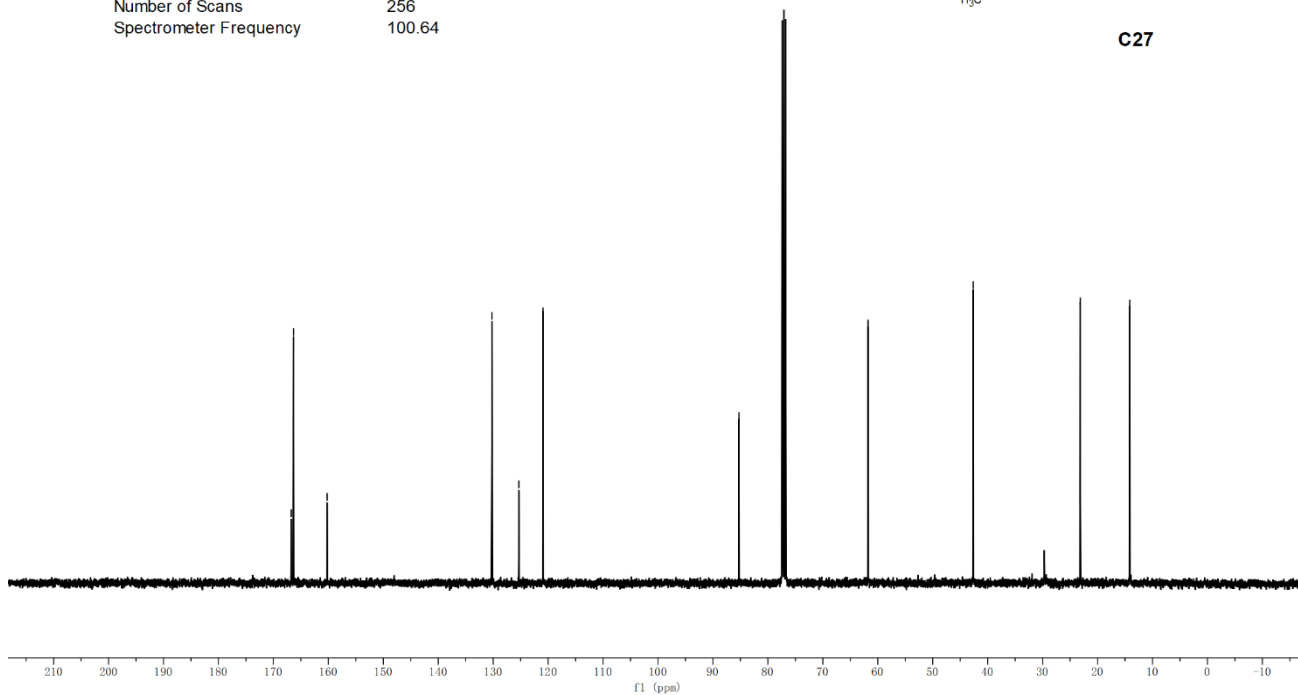

8.02  
5.74  
5.71  
5.69  
5.67  
5.21  
5.20  
5.20  
5.20  
5.19  
5.19  
5.17  
5.17  
5.17  
5.16  
5.15  
4.37  
4.35  
4.33  
4.31  
2.68  
2.66  
1.39  
1.37  
1.35  
1.24  
1.23  
1.23  
1.22  
1.21  
1.21  
0.61  
0.61  
0.60  
0.60  
0.59  
0.59  
0.58  
0.58  
0.57  
0.57  
0.56  
0.55  
0.55  
0.52  
0.51  
0.51  
0.50  
0.50  
0.50  
0.49  
0.49  
0.48  
0.47  
0.27  
0.27  
0.26  
0.26  
0.25  
0.25  
0.24  
0.24

| Parameter              | Value                   |
|------------------------|-------------------------|
| Title                  | tanz-20230907-162.9.fid |
| Solvent                | CDCl3                   |
| Temperature            | 293.8                   |
| Number of Scans        | 16                      |
| Spectrometer Frequency | 400.18                  |

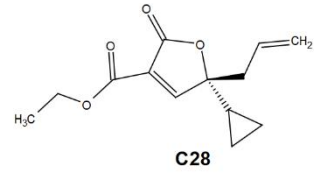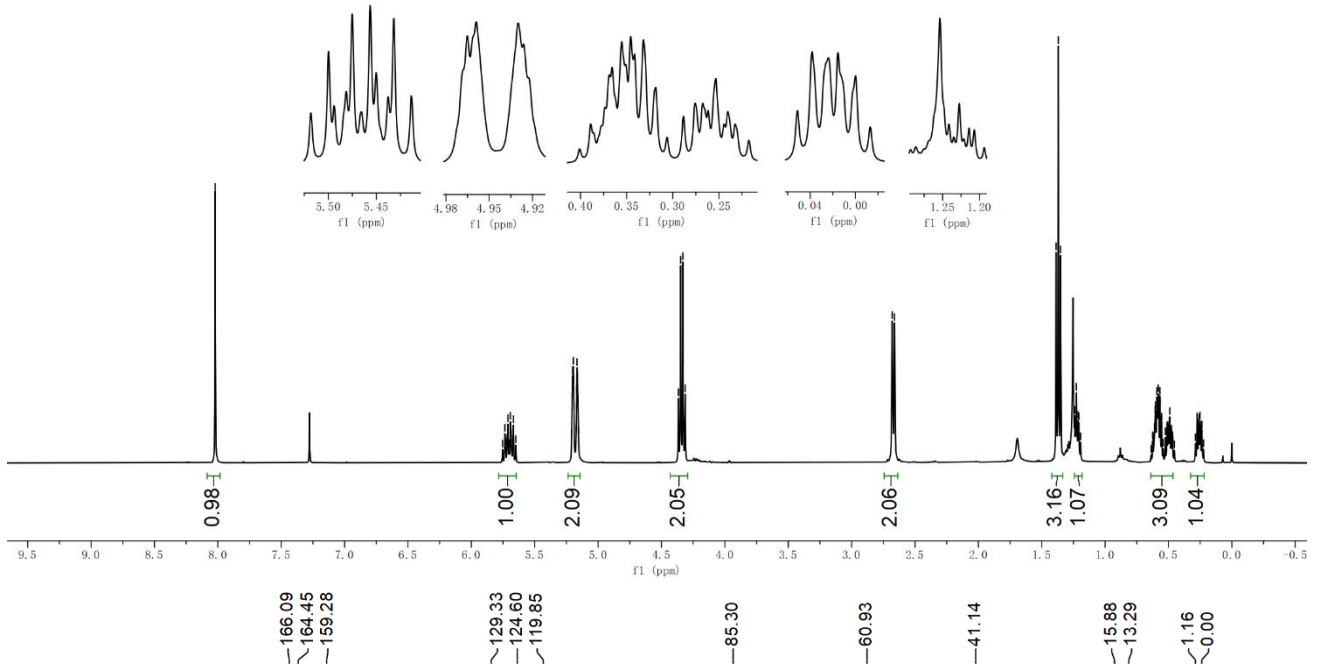

| Parameter              | Value                    |
|------------------------|--------------------------|
| Title                  | tanz-20230907-162.10.fid |
| Solvent                | CDCl3                    |
| Temperature            | 294.2                    |
| Number of Scans        | 256                      |
| Spectrometer Frequency | 100.64                   |

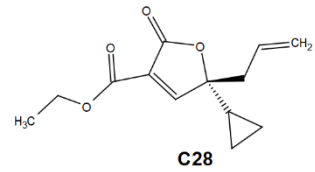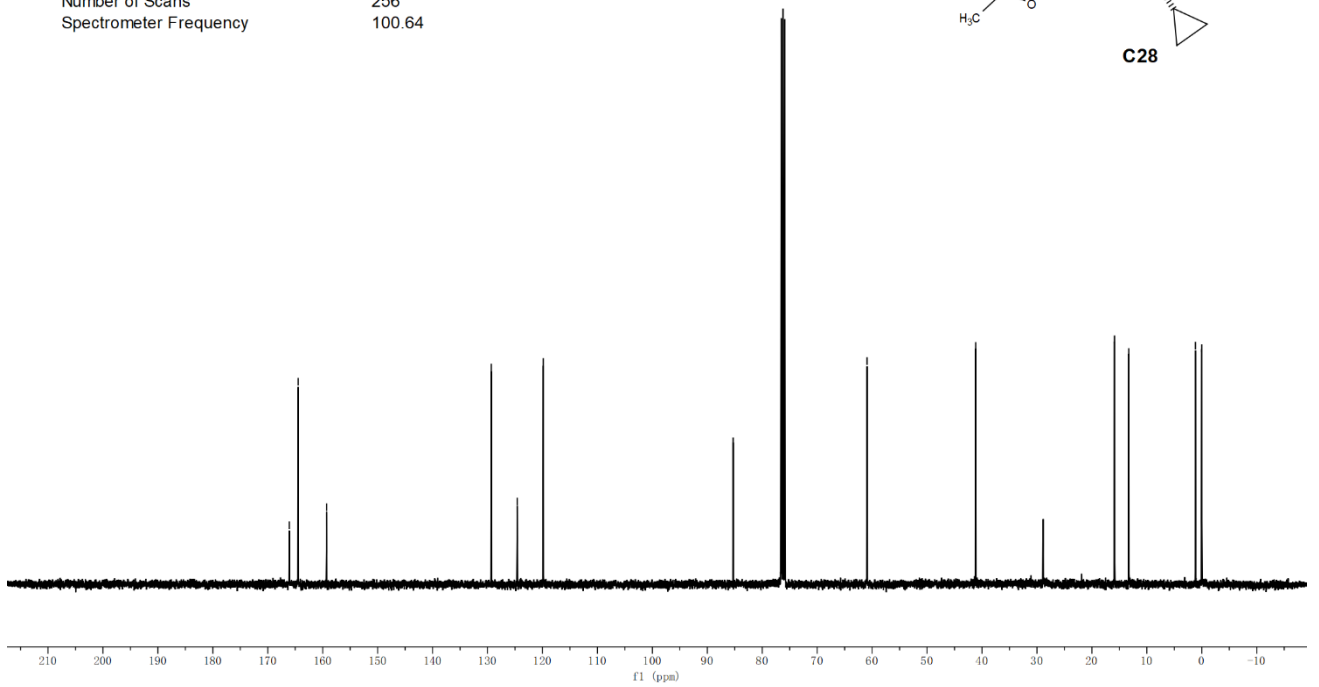



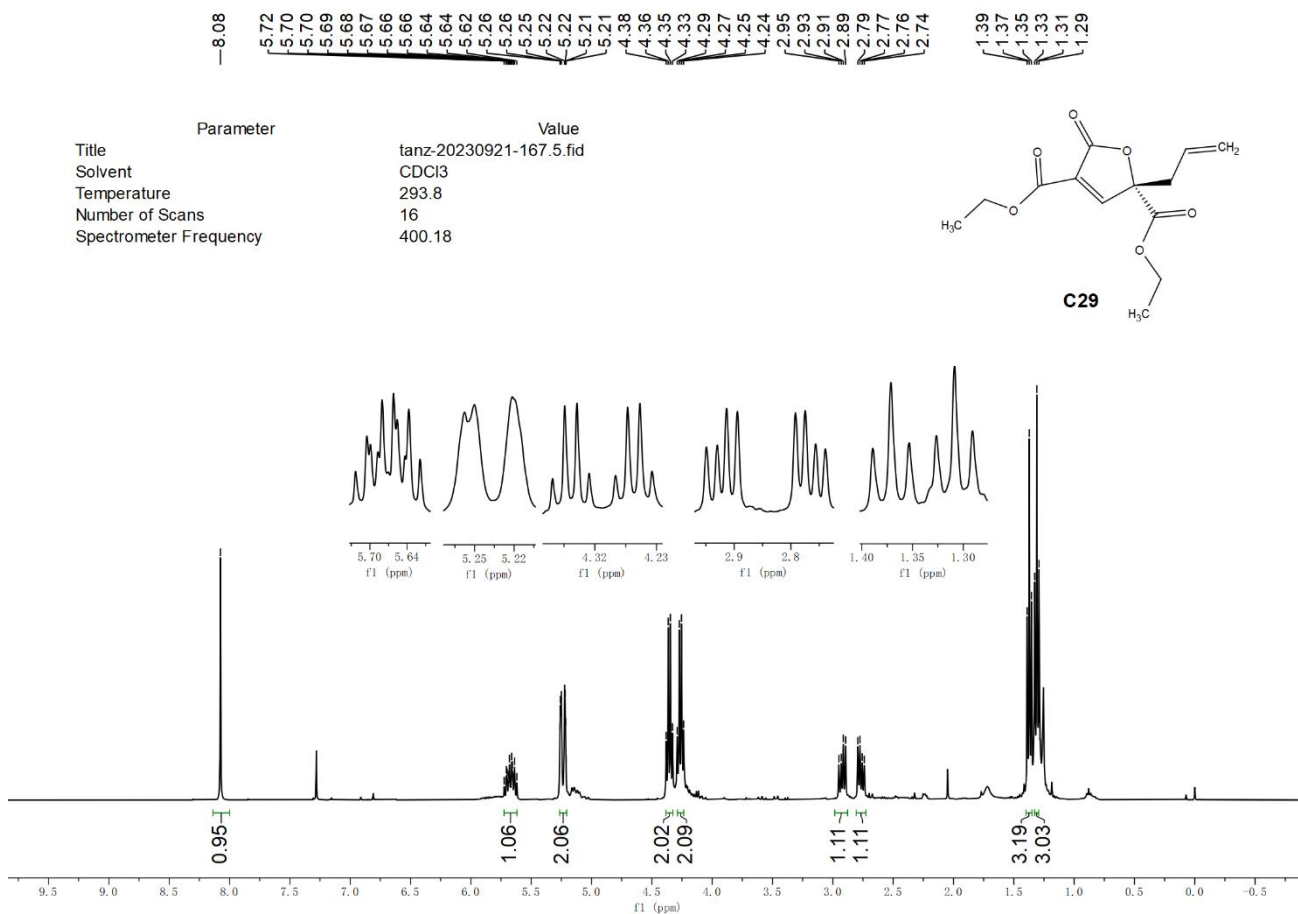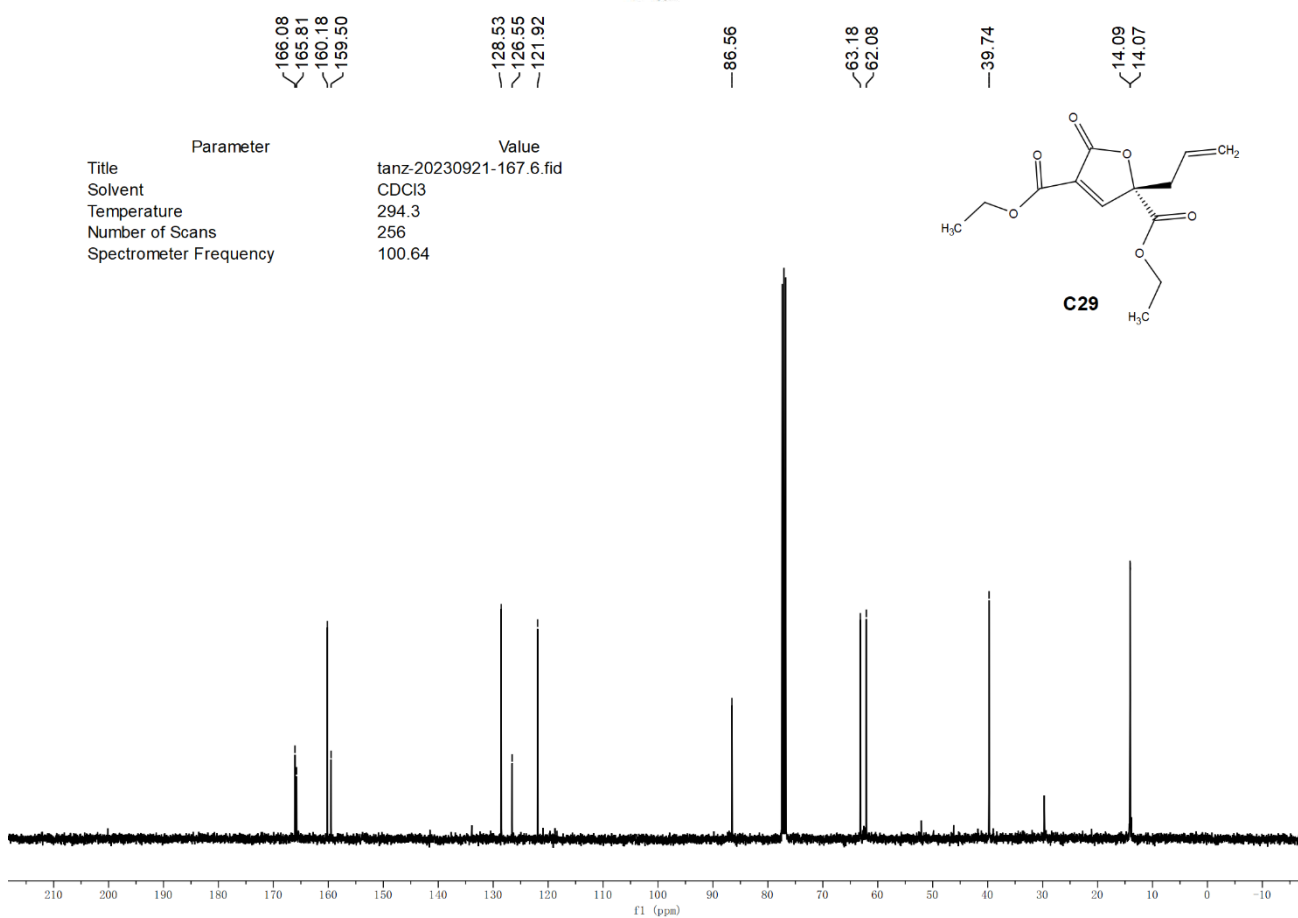

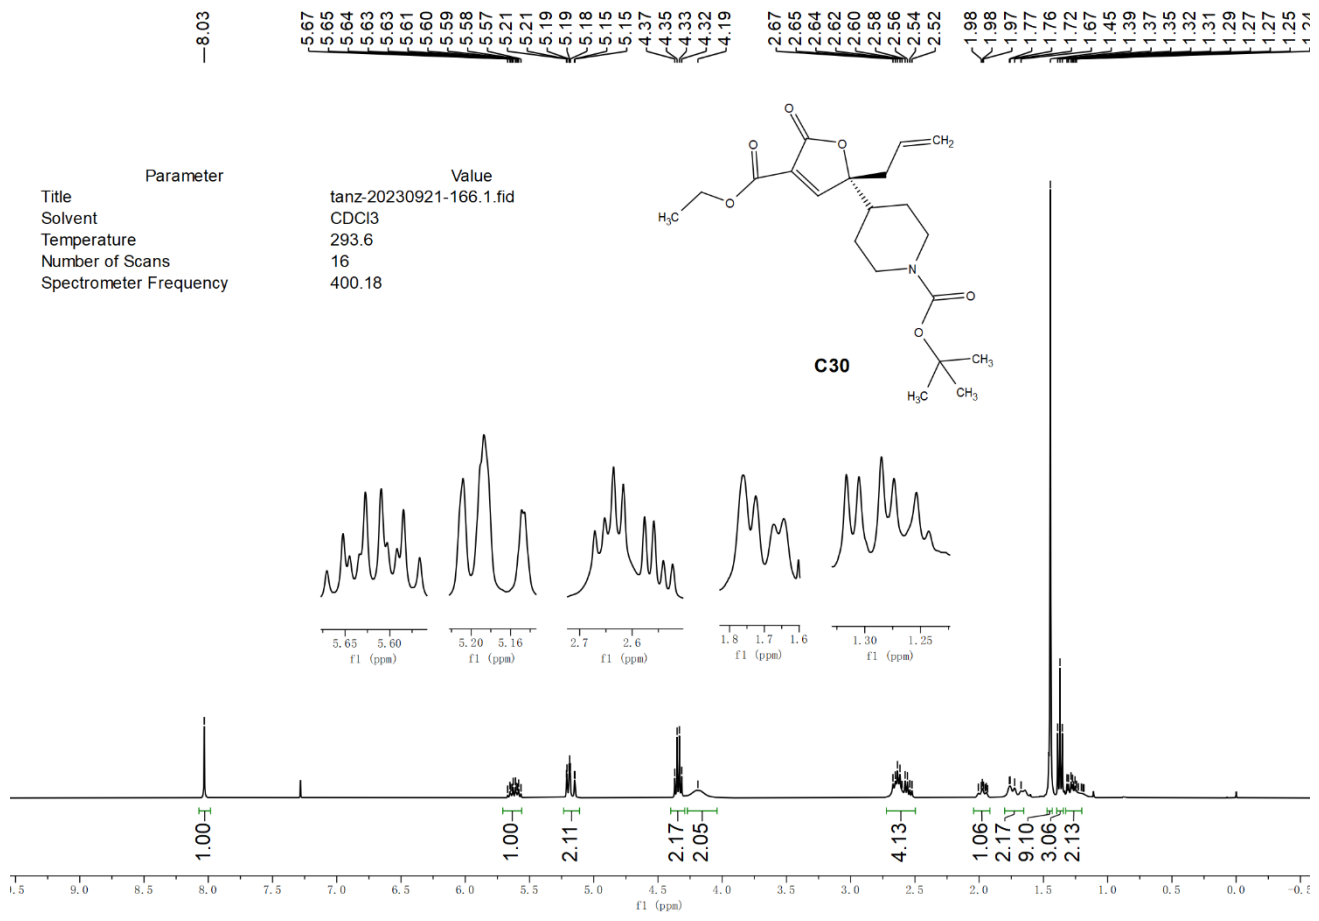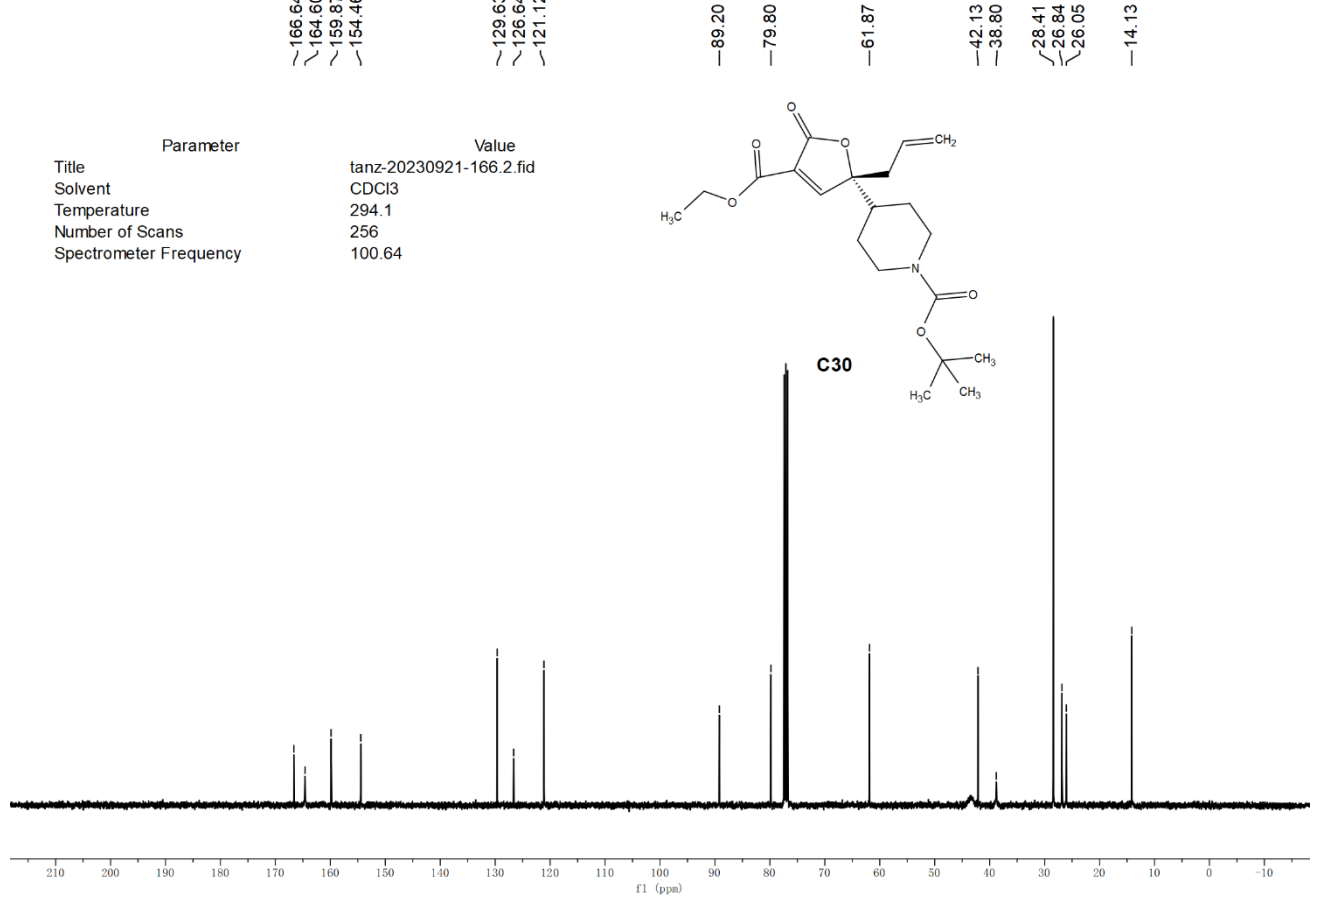

8.32  
7.42  
7.42  
7.41  
7.40  
7.39  
7.38  
7.37  
7.36  
7.35  
7.35  
7.34  
7.33  
7.33  
5.58  
5.57  
5.57  
5.55  
5.55  
5.54  
5.53  
5.53  
5.25  
5.24  
5.23  
5.22  
5.22  
5.22  
5.20  
5.20  
4.36  
4.34  
4.33  
4.31  
2.85  
2.85  
2.84  
2.83  
2.82  
2.82  
2.81  
2.80  
2.80  
2.78  
2.78  
2.78  
1.63  
1.62  
1.61  
1.37  
1.35  
1.34

| Parameter              | Value                   |
|------------------------|-------------------------|
| Title                  | tanz-20231122-168.1.fid |
| Solvent                | CDCl3                   |
| Temperature            | 293.3                   |
| Number of Scans        | 16                      |
| Spectrometer Frequency | 400.18                  |

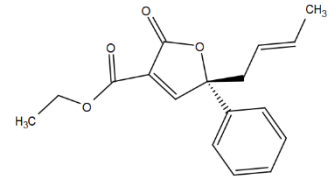

C31

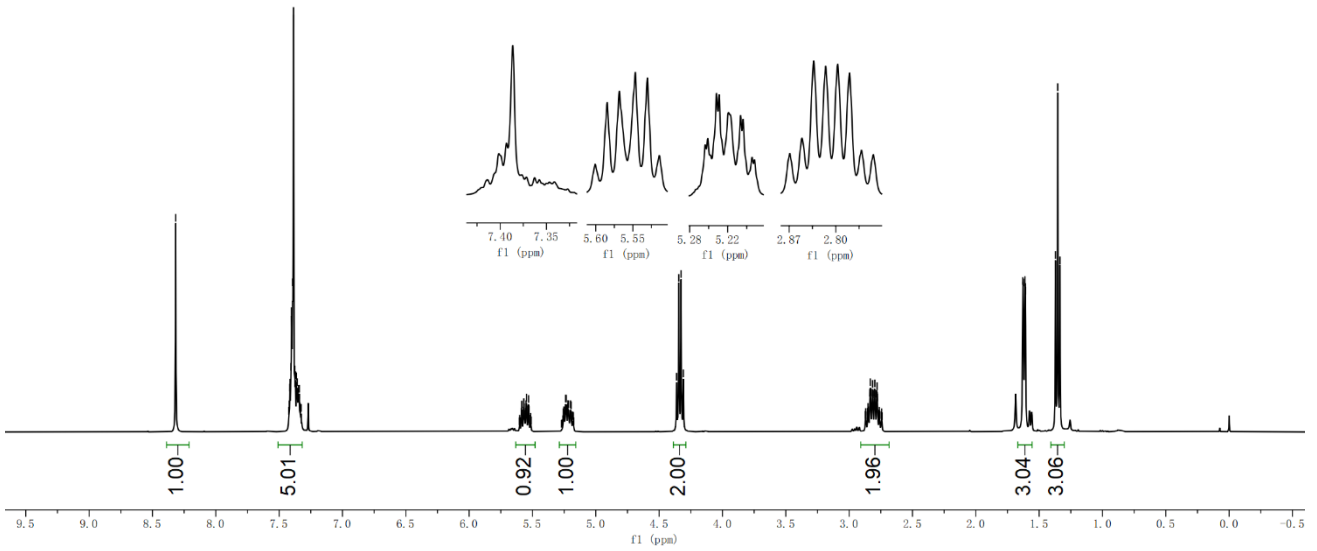

166.73  
165.28  
160.15  
137.47  
132.17  
128.99  
128.63  
125.19  
124.58  
121.94  
88.27  
61.81  
42.93  
18.05  
14.15

| Parameter              | Value                   |
|------------------------|-------------------------|
| Title                  | tanz-20231122-168.2.fid |
| Solvent                | CDCl3                   |
| Temperature            | 293.9                   |
| Number of Scans        | 256                     |
| Spectrometer Frequency | 100.64                  |

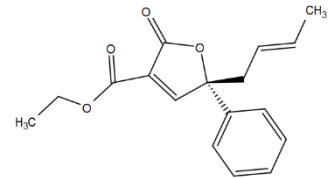

C31

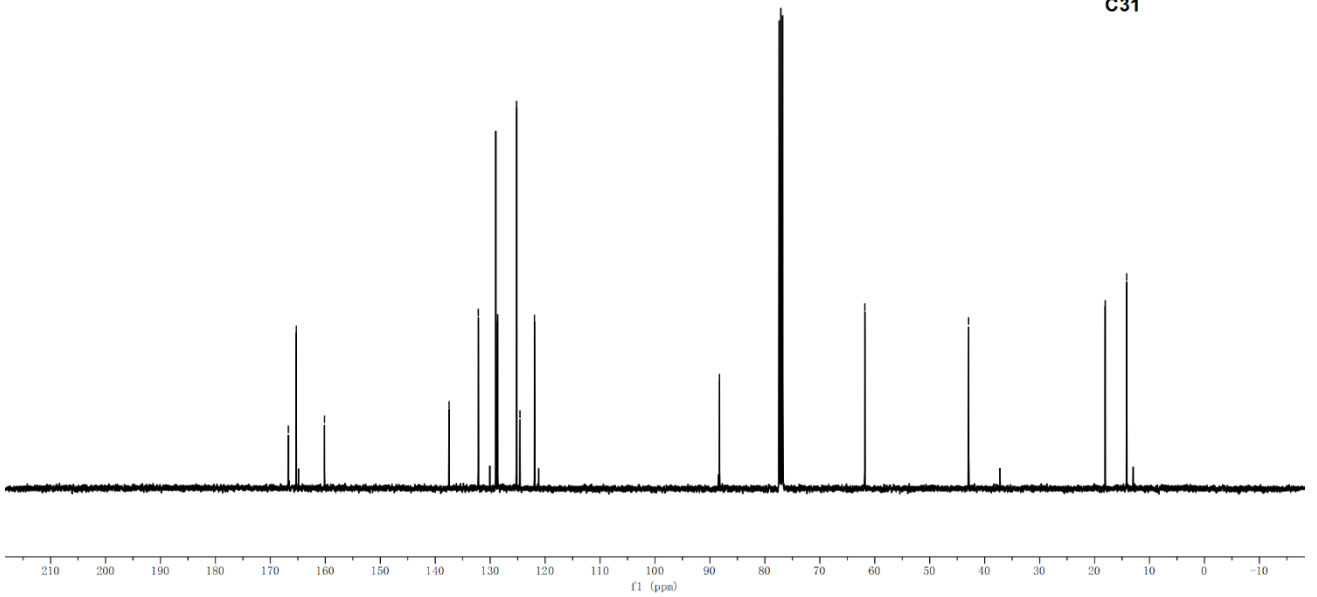

8.31  
7.41  
7.40  
7.40  
7.39  
7.38  
7.37  
7.36  
7.35  
7.35  
7.34  
7.34  
7.33  
7.32  
5.54  
5.54  
5.53  
5.52  
5.52  
5.50  
5.50  
5.48  
5.25  
5.23  
5.23  
5.22  
5.21  
5.21  
5.19  
5.19  
5.19  
4.36  
4.34  
4.32  
4.31  
2.86  
2.84  
2.84  
2.82  
2.82  
2.80  
2.80  
2.79  
2.78  
2.77  
1.95  
1.93  
1.91  
1.90  
1.37  
1.35  
1.33  
1.32  
1.30  
1.28  
1.27  
1.02  
0.80  
0.79

| Parameter              | Value                   |
|------------------------|-------------------------|
| Title                  | tanz-20231122-169.5.fid |
| Solvent                | CDCl3                   |
| Temperature            | 293.6                   |
| Number of Scans        | 16                      |
| Spectrometer Frequency | 400.18                  |

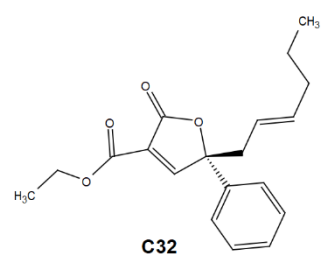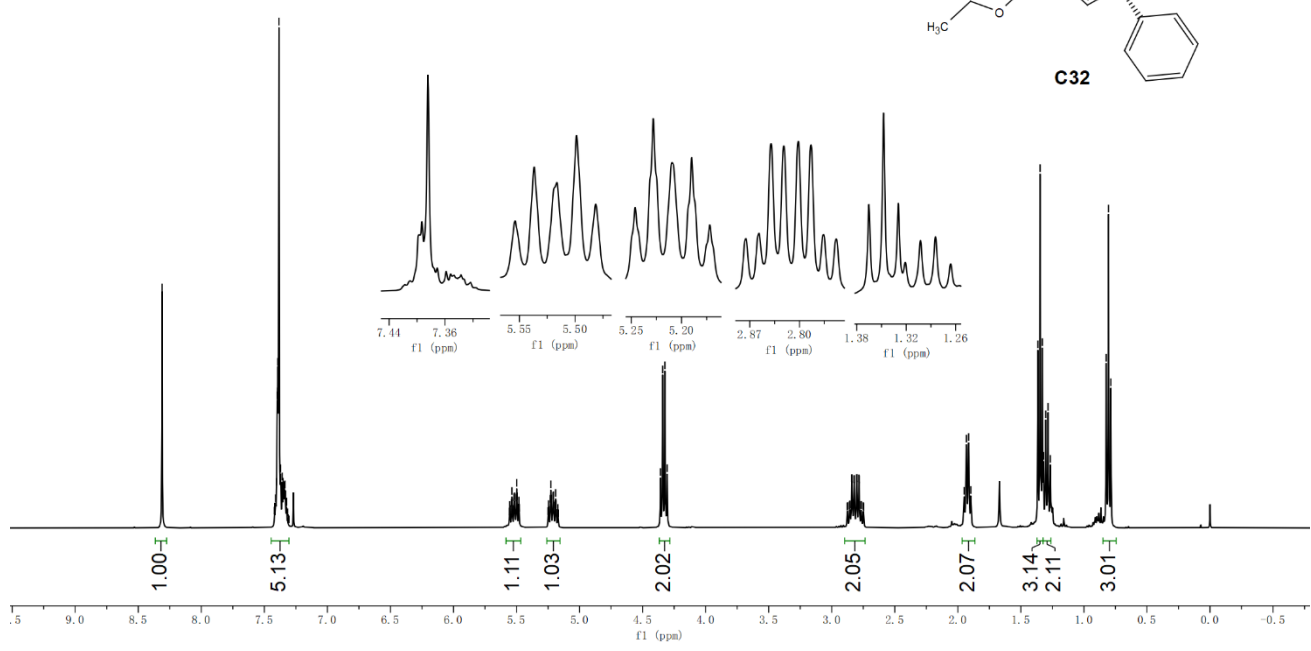

166.71  
165.29  
160.12  
137.60  
137.48  
128.97  
128.61  
125.19  
124.63  
120.99  
88.34  
61.78  
42.96  
34.55  
22.25  
14.15  
13.50

| Parameter              | Value                   |
|------------------------|-------------------------|
| Title                  | tanz-20231122-169.6.fid |
| Solvent                | CDCl3                   |
| Temperature            | 294.0                   |
| Number of Scans        | 256                     |
| Spectrometer Frequency | 100.64                  |

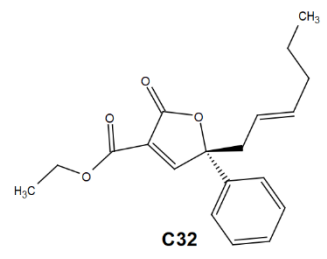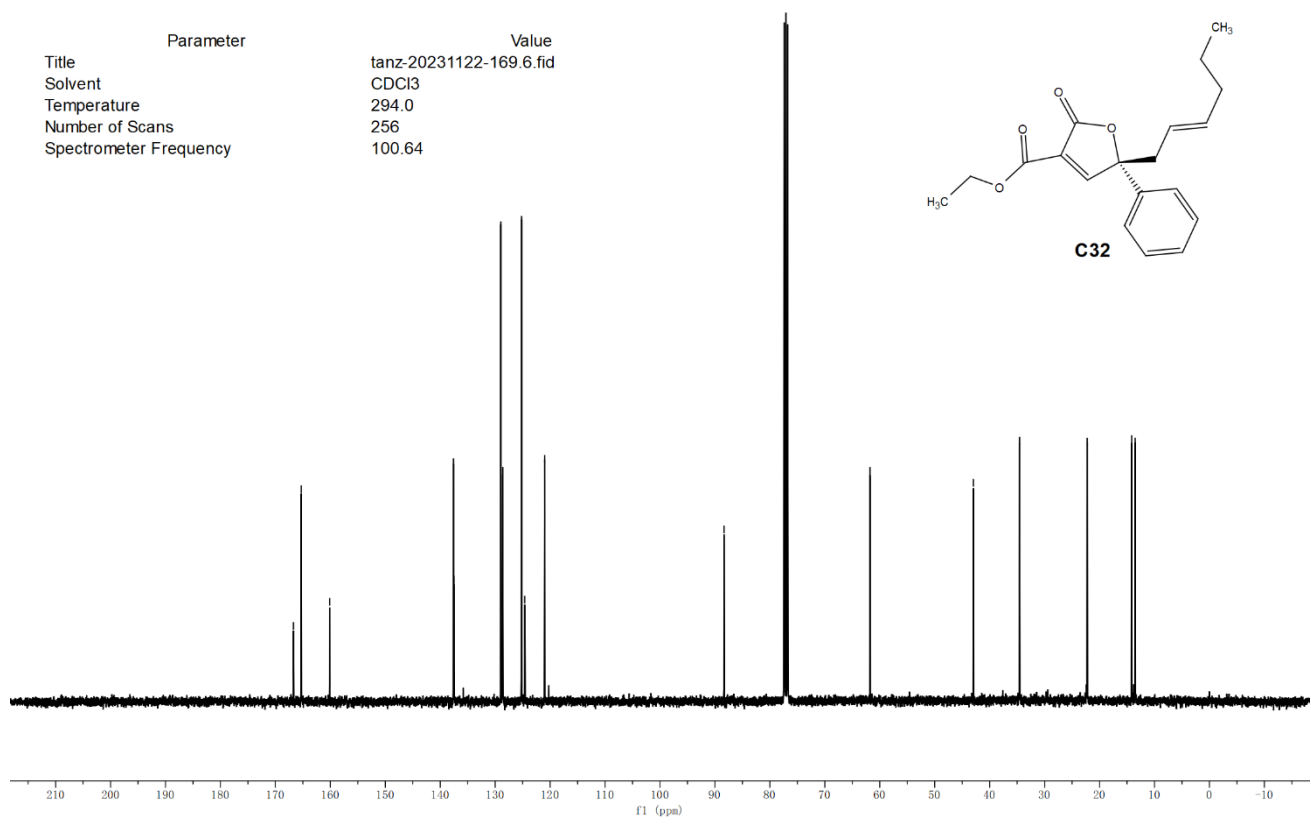

8.39  
7.44  
7.42  
7.42  
7.41  
7.40  
7.39  
7.39  
7.38  
7.37  
7.37  
7.36  
7.35  
7.35  
7.34  
7.34  
7.30  
7.30  
7.29  
7.28  
7.28  
7.27  
7.26  
7.25  
7.25  
7.24  
7.23  
7.23  
7.22  
7.22  
7.21  
7.20  
7.20  
6.47  
6.43  
6.00  
5.98  
5.96  
5.96  
5.94  
5.93  
5.93  
4.32  
4.32  
4.31  
4.29  
4.29  
3.09  
3.09  
3.07  
3.07  
3.05  
3.05  
3.04  
3.03  
3.03  
3.01  
3.01  
2.99  
2.99  
2.97  
2.96  
2.96  
1.35  
1.33  
1.31

| Parameter              | Value                         |
|------------------------|-------------------------------|
| Title                  | tanz-20231220-YHAY-tz-1.1.fid |
| Solvent                | CDCl3                         |
| Temperature            | 293.6                         |
| Number of Scans        | 16                            |
| Spectrometer Frequency | 400.18                        |

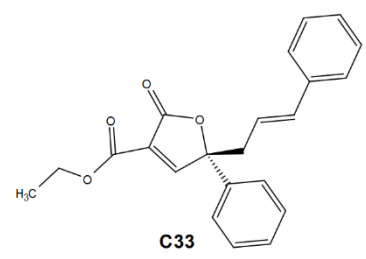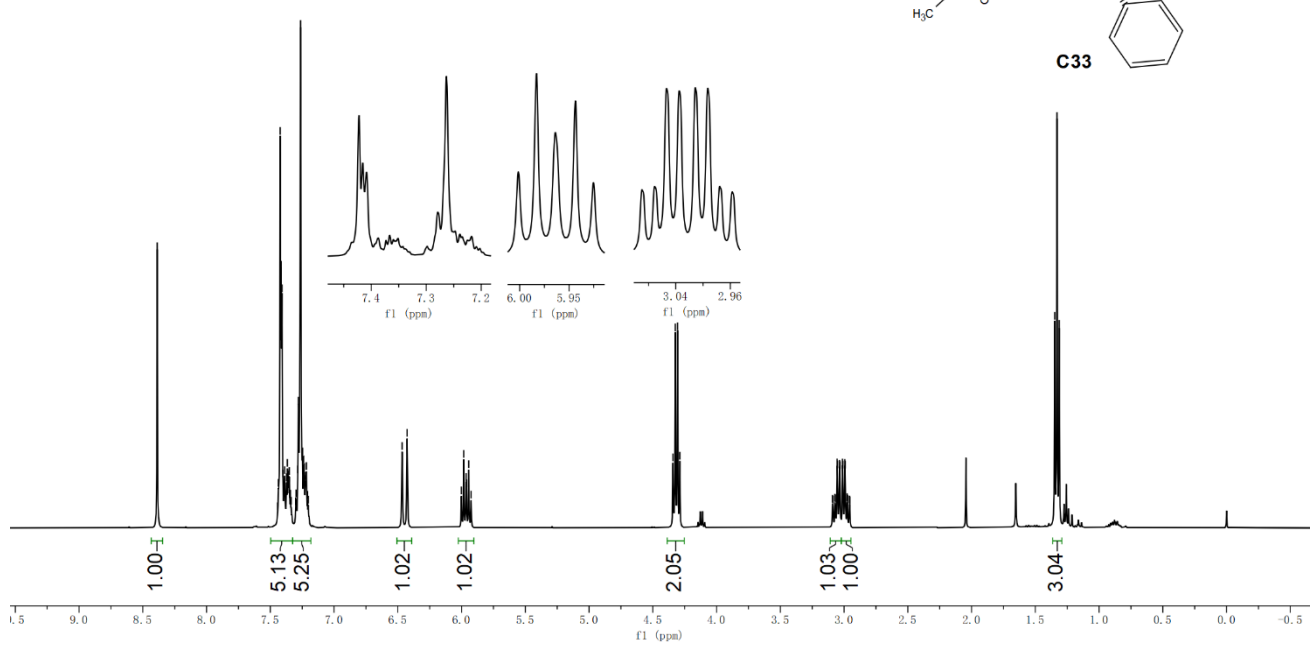

166.54  
165.05  
160.05  
137.21  
136.48  
135.81  
129.11  
128.80  
128.59  
127.84  
126.38  
125.23  
124.69  
120.86  
88.24  
61.88  
43.38  
14.13

| Parameter              | Value                         |
|------------------------|-------------------------------|
| Title                  | tanz-20231220-YHAY-tz-1.2.fid |
| Solvent                | CDCl3                         |
| Temperature            | 293.8                         |
| Number of Scans        | 256                           |
| Spectrometer Frequency | 100.64                        |

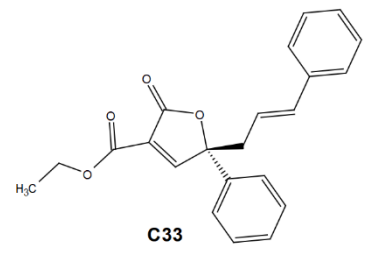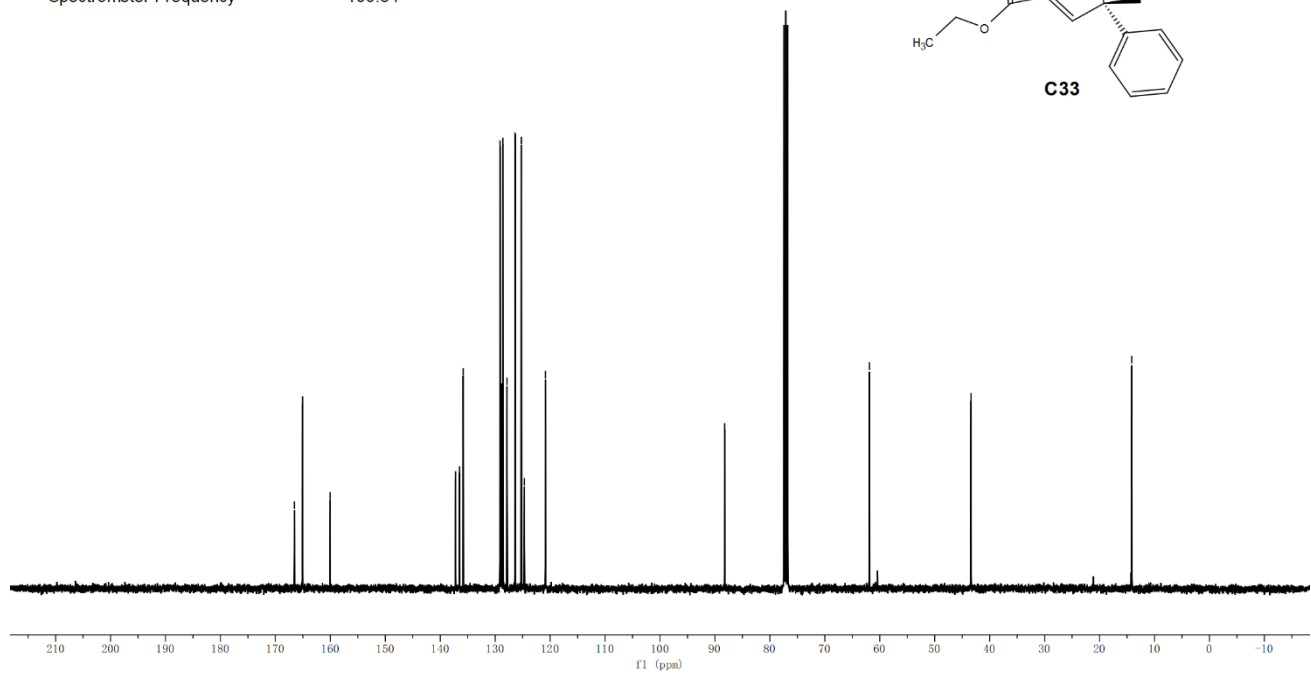

7.66  
7.64  
7.40  
7.39  
7.38  
7.37  
7.36  
7.35  
7.34  
7.33  
7.32  
7.31  
6.11  
6.09  
5.64  
5.62  
5.62  
5.62  
5.60  
5.59  
5.58  
5.57  
5.56  
5.14  
5.14  
5.13  
5.13  
5.12  
5.12  
5.12  
5.11  
5.10  
5.10  
5.09  
5.09  
2.92  
2.91  
2.91  
2.89  
2.89  
2.88  
2.88  
2.87  
2.86  
2.86  
2.86  
2.82  
2.82  
2.82  
2.81  
2.80  
2.80  
2.79  
2.78  
2.77  
2.77

| Parameter              | Value                  |
|------------------------|------------------------|
| Title                  | tanz-20240201-LR.1.fid |
| Solvent                | CDCl3                  |
| Temperature            | 293.6                  |
| Number of Scans        | 16                     |
| Spectrometer Frequency | 400.18                 |

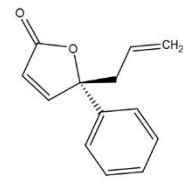

D1

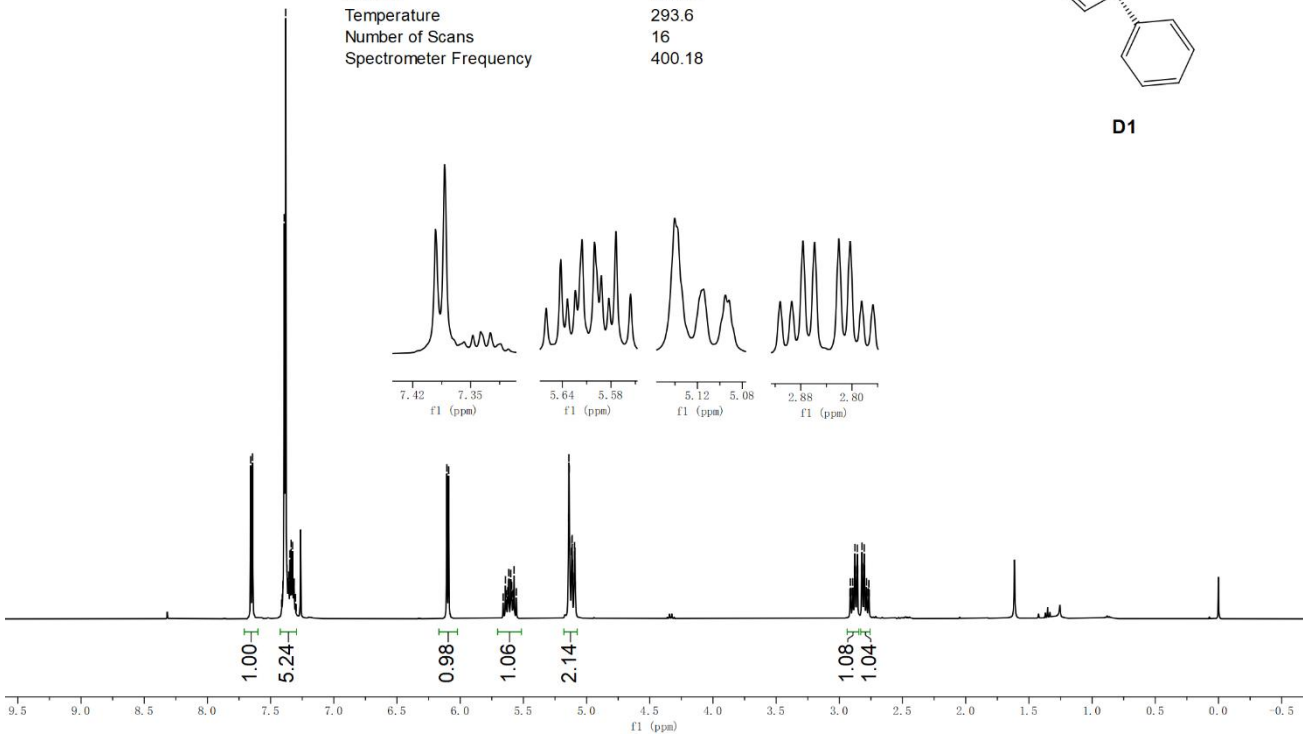

172.08  
158.68  
138.58  
130.41  
128.83  
128.35  
125.12  
120.61  
120.47  
90.73  
44.05

| Parameter              | Value                  |
|------------------------|------------------------|
| Title                  | tanz-20240201-LR.2.fid |
| Solvent                | CDCl3                  |
| Temperature            | 294.4                  |
| Number of Scans        | 256                    |
| Spectrometer Frequency | 100.64                 |

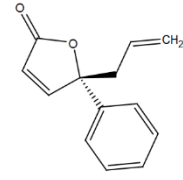

D1

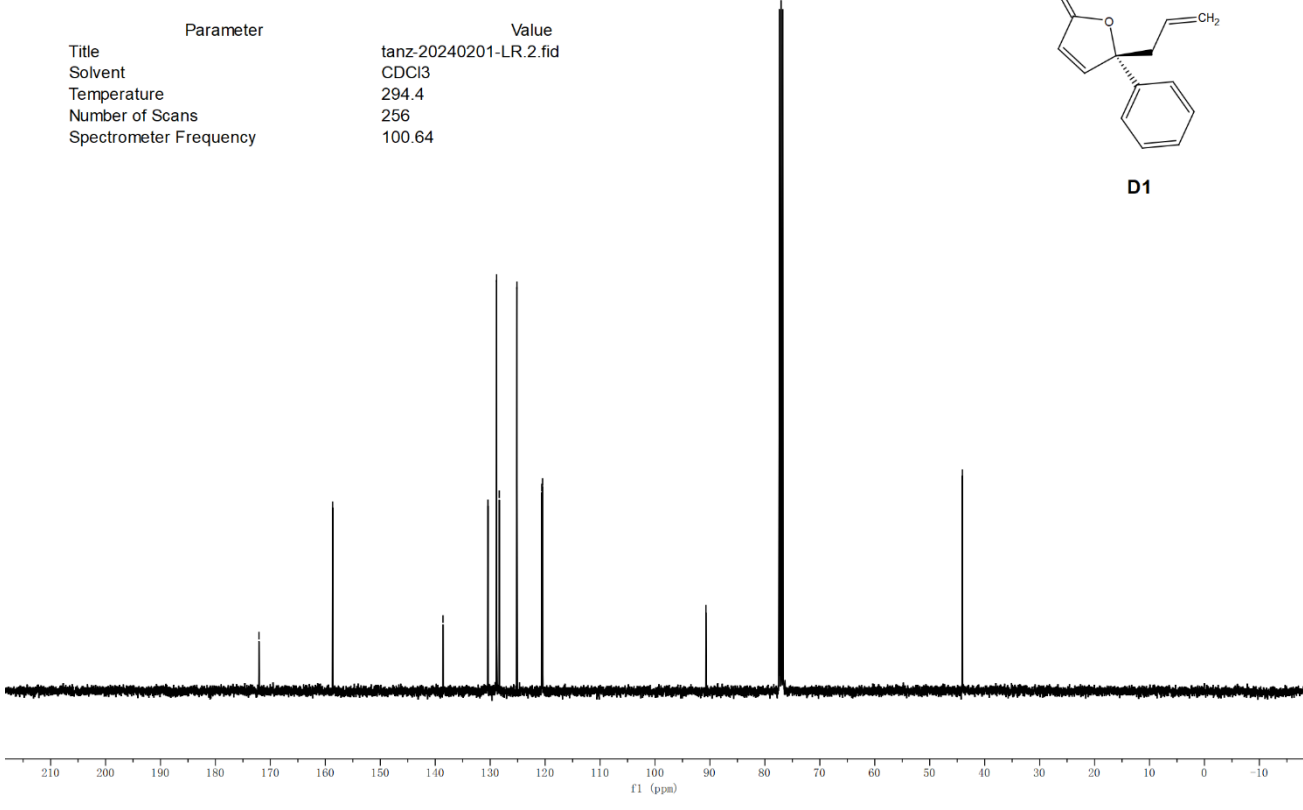

7.40  
7.40  
7.38  
7.38  
7.36  
7.36  
7.35  
7.35  
7.34  
7.34  
7.33  
7.33  
7.32  
7.32  
7.31  
7.31  
7.30  
7.30  
5.64  
5.63  
5.18  
5.18  
5.17  
5.17  
5.16  
5.16  
5.15  
5.15  
5.14  
5.14  
5.13  
5.13  
5.12  
5.12  
5.11  
5.11  
5.10  
5.10  
5.08  
5.08  
4.27  
4.26  
4.26  
4.25  
4.24  
4.24  
4.13  
4.13  
4.11  
4.11  
3.78  
3.78  
3.47  
3.46  
3.44  
3.44  
2.91  
2.91  
2.89  
2.88  
2.88  
2.87  
2.87  
2.86  
2.84  
2.84  
2.83  
2.81  
2.81  
2.79  
2.79  
2.77  
2.75  
2.75  
2.74  
2.74  
2.71  
2.71  
2.70  
2.66  
2.64  
1.32  
1.32  
1.30  
1.28  
1.28  
1.21  
1.19  
1.18

| Parameter              | Value                   |
|------------------------|-------------------------|
| Title                  | tanz-20240201-199.1.fid |
| Solvent                | CDCl3                   |
| Temperature            | 293.8                   |
| Number of Scans        | 16                      |
| Spectrometer Frequency | 400.18                  |

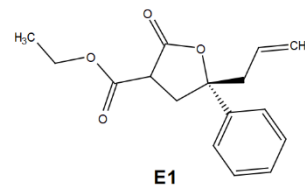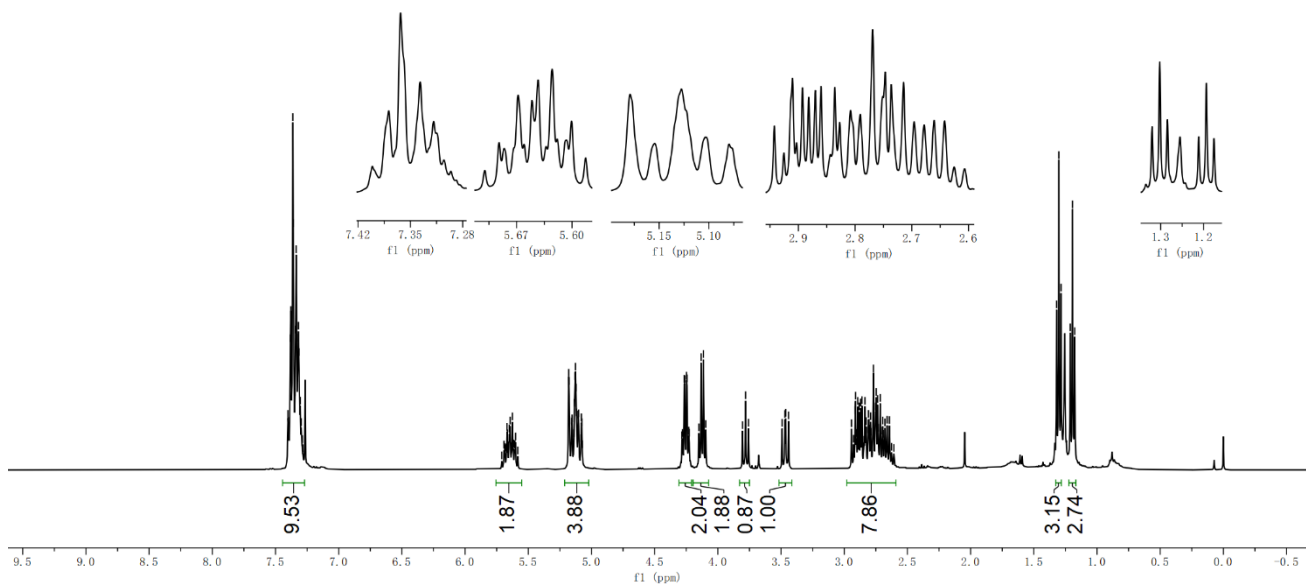

171.26  
171.08  
167.62  
167.36  
142.90  
141.68  
131.17  
131.09  
128.70  
128.50  
128.07  
127.86  
124.73  
124.56  
120.80  
120.14  
87.52  
87.42  
62.24  
62.21  
47.41  
46.92  
46.63  
46.46  
37.63  
36.78  
14.09  
13.94

| Parameter              | Value                   |
|------------------------|-------------------------|
| Title                  | tanz-20240201-199.2.fid |
| Solvent                | CDCl3                   |
| Temperature            | 294.3                   |
| Number of Scans        | 256                     |
| Spectrometer Frequency | 100.64                  |

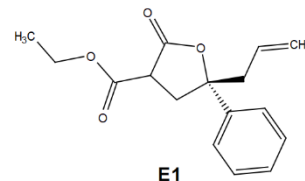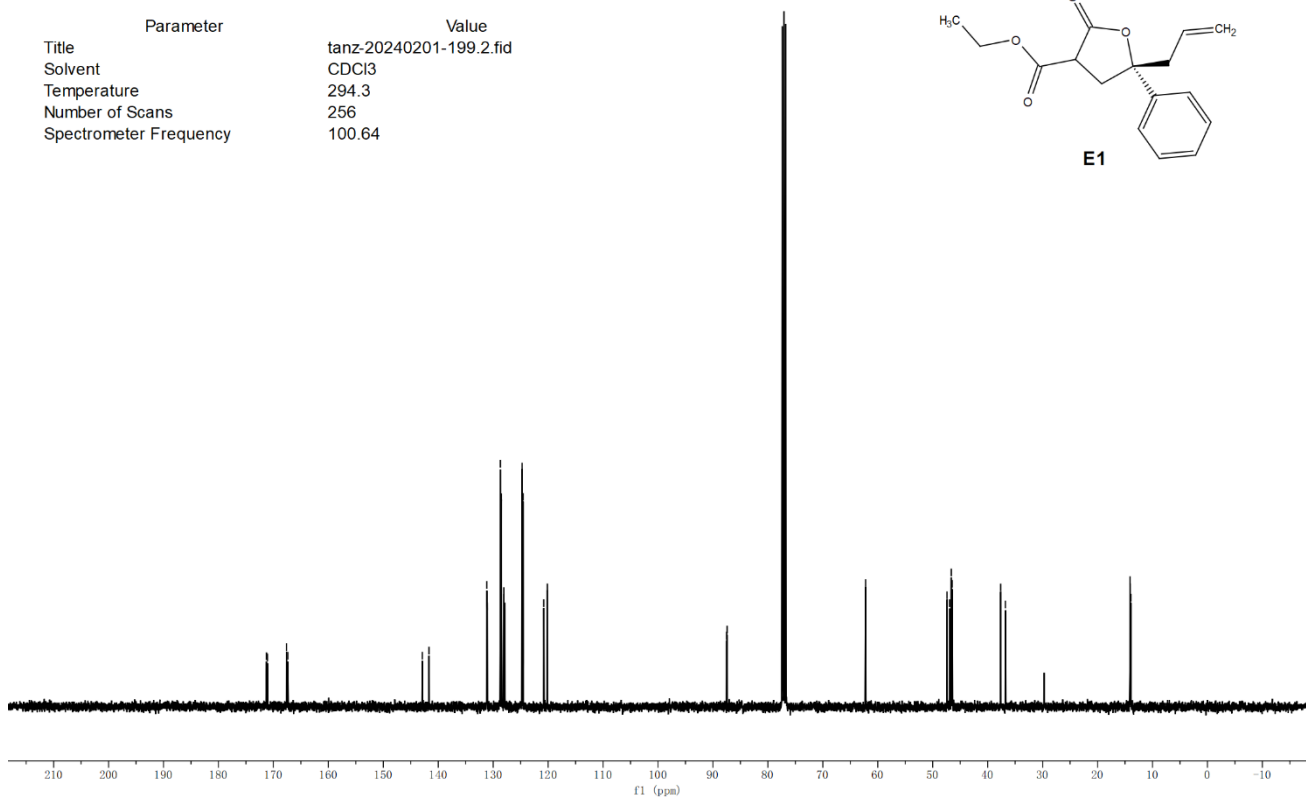

## (L) References

- [1] Y. H. Wen, X. Huang, J. L. Huang, Y. Xiong, B. Qin and X. M. Feng, *Synlett*, 2005, **16**, 2445–2448.
- [2] Wu, Q. Shao, G. Yang and W. Zhang, *Chem. Eur. J.*, 2018, **24**, 1241–1245.
- [3] M. Wu, Z. Han, H. Ni, N. Wang, K. Ding and Y. Lu, *Chem. Sci.*, 2022, **13**, 3161–3168.
- [4] (a) G. M. Sheldrick, *Acta Cryst.* 2008, **A64**, 112–122. (b) G. M. Sheldrick, *Acta Cryst.* 2015, **A71**, 3–8. (c) G. M. Sheldrick, *Acta Cryst.* 2015, **C71**, 3–8. (d) O.V. Dolomanov, L.J. Bourhis, R.J. Gildea, J. A. K. Howard, H. Puschmann, *J. Appl. Cryst.* 2009, **42**, 339–341. (e) A. L. Spek, *J. Appl. Cryst.* 2003, **36**, 7–13.
